# Supplementary material
Source: PubMed Central journal article supplement (PMC3324882)

**Replacing conventional carbon nucleophiles with electrophiles:nickel-catalyzed  
reductive alkylation of aryl bromides and chlorides**

Daniel A. Everson, Brittany A. Jones, and Daniel J. Weix\*.  
Department of Chemistry, University of Rochester, Rochester, NY 14627

**Supporting Information**

## Table of Contents

|                                                                   |    |
|-------------------------------------------------------------------|----|
| 1. General                                                        | 4  |
| 2. Methods                                                        | 5  |
| 3. Preparation of substrates used in reductive coupling reactions | 6  |
| 4. Reductive cross-coupling reactions                             | 7  |
| 5. Selectivity Data for Reductive Cross-Couplings in Schemes 2-4  | 10 |
| 6. Hammett Study                                                  | 15 |
| 7. Substrates, catalyst, and reducing agents effects on rate      | 20 |
| 8. Compound characterization                                      | 22 |
| 9. Spectra                                                        |    |
| ○ p-Bromophenyl-dimethylsilanol <sup>1</sup> H NMR                | 47 |
| ○ p-Bromophenyl-dimethylsilanol <sup>13</sup> C NMR               | 48 |
| ○ Compound <b>3b</b> <sup>1</sup> H NMR                           | 49 |
| ○ Compound <b>3b</b> <sup>13</sup> C NMR                          | 50 |
| ○ Compound <b>3c</b> <sup>1</sup> H NMR                           | 51 |
| ○ Compound <b>3c</b> <sup>13</sup> C NMR                          | 52 |
| ○ Compound <b>3d</b> <sup>1</sup> H NMR                           | 53 |
| ○ Compound <b>3d</b> <sup>13</sup> C NMR                          | 54 |
| ○ Compound <b>3e</b> <sup>1</sup> H NMR                           | 55 |
| ○ Compound <b>3e</b> <sup>13</sup> C NMR                          | 56 |
| ○ Compound <b>3f</b> <sup>1</sup> H NMR                           | 57 |
| ○ Compound <b>3f</b> <sup>13</sup> C NMR                          | 58 |
| ○ Compound <b>3g</b> <sup>1</sup> H NMR                           | 59 |
| ○ Compound <b>3g</b> <sup>13</sup> C NMR                          | 60 |
| ○ Compound <b>3h</b> <sup>1</sup> H NMR                           | 61 |
| ○ Compound <b>3h</b> <sup>13</sup> C NMR                          | 62 |
| ○ Compound <b>3i</b> <sup>1</sup> H NMR                           | 63 |
| ○ Compound <b>3i</b> <sup>13</sup> C NMR                          | 64 |
| ○ Compound <b>3i</b> <sup>19</sup> F NMR                          | 65 |
| ○ Compound <b>3j</b> <sup>1</sup> H NMR                           | 66 |
| ○ Compound <b>3j</b> <sup>13</sup> C NMR                          | 67 |
| ○ Compound <b>3j</b> <sup>19</sup> F NMR                          | 68 |
| ○ Compound <b>3k</b> <sup>1</sup> H NMR                           | 69 |
| ○ Compound <b>3k</b> <sup>13</sup> C NMR                          | 70 |
| ○ Compound <b>3l</b> <sup>1</sup> H NMR                           | 71 |
| ○ Compound <b>3l</b> <sup>13</sup> C NMR                          | 72 |
| ○ Compound <b>3m</b> <sup>1</sup> H NMR                           | 73 |
| ○ Compound <b>3m</b> <sup>13</sup> C NMR                          | 74 |
| ○ Compound <b>3n</b> <sup>1</sup> H NMR                           | 75 |
| ○ Compound <b>3n</b> <sup>13</sup> C NMR                          | 76 |
| ○ Compound <b>3o</b> <sup>1</sup> H NMR                           | 77 |
| ○ Compound <b>3o</b> <sup>13</sup> C NMR                          | 78 |
| ○ Compound <b>3p</b> <sup>1</sup> H NMR                           | 79 |
| ○ Compound <b>3p</b> <sup>13</sup> C NMR                          | 80 |
| ○ Compound <b>3q</b> <sup>1</sup> H NMR                           | 81 |
| ○ Compound <b>3q</b> <sup>13</sup> C NMR                          | 82 |

|                                           |     |
|-------------------------------------------|-----|
| ○ Compound <b>3r</b> <sup>1</sup> H NMR   | 83  |
| ○ Compound <b>3r</b> <sup>13</sup> C NMR  | 84  |
| ○ Compound <b>3s</b> <sup>1</sup> H NMR   | 85  |
| ○ Compound <b>3s</b> <sup>13</sup> C NMR  | 86  |
| ○ Compound <b>3t</b> <sup>1</sup> H NMR   | 87  |
| ○ Compound <b>3t</b> <sup>13</sup> C NMR  | 88  |
| ○ Compound <b>3u</b> <sup>1</sup> H NMR   | 89  |
| ○ Compound <b>3u</b> <sup>13</sup> C NMR  | 90  |
| ○ Compound <b>3v</b> <sup>1</sup> H NMR   | 91  |
| ○ Compound <b>3v</b> <sup>13</sup> C NMR  | 92  |
| ○ Compound <b>3b</b> <sup>1</sup> H NMR   | 93  |
| ○ Compound <b>3b</b> <sup>13</sup> C NMR  | 94  |
| ○ Compound <b>3w</b> <sup>1</sup> H NMR   | 95  |
| ○ Compound <b>3w</b> <sup>13</sup> C NMR  | 96  |
| ○ Compound <b>3i</b> <sup>1</sup> H NMR   | 97  |
| ○ Compound <b>3i</b> <sup>13</sup> C NMR  | 98  |
| ○ Compound <b>3i</b> <sup>19</sup> F NMR  | 99  |
| ○ Compound <b>3d</b> <sup>1</sup> H NMR   | 100 |
| ○ Compound <b>3d</b> <sup>13</sup> C NMR  | 101 |
| ○ Compound <b>3h</b> <sup>1</sup> H NMR   | 102 |
| ○ Compound <b>3h</b> <sup>13</sup> C NMR  | 103 |
| ○ Compound <b>3x</b> <sup>1</sup> H NMR   | 104 |
| ○ Compound <b>3x</b> <sup>13</sup> C NMR  | 105 |
| ○ Compound <b>3y</b> <sup>1</sup> H NMR   | 106 |
| ○ Compound <b>3y</b> <sup>13</sup> C NMR  | 107 |
| ○ Compound <b>3y</b> <sup>19</sup> F NMR  | 108 |
| ○ Compound <b>3z</b> <sup>1</sup> H NMR   | 109 |
| ○ Compound <b>3z</b> <sup>13</sup> C NMR  | 110 |
| ○ Compound <b>3aa</b> <sup>1</sup> H NMR  | 111 |
| ○ Compound <b>3aa</b> <sup>13</sup> C NMR | 112 |
| ○ Compound <b>3ab</b> <sup>1</sup> H NMR  | 113 |
| ○ Compound <b>3ab</b> <sup>13</sup> C NMR | 114 |
| ○ Compound <b>3ac</b> <sup>1</sup> H NMR  | 115 |
| ○ Compound <b>3ac</b> <sup>13</sup> C NMR | 116 |
| ○ Compound <b>3ad</b> <sup>1</sup> H NMR  | 117 |
| ○ Compound <b>3ad</b> <sup>13</sup> C NMR | 118 |
| ○ Compound <b>3ae</b> <sup>1</sup> H NMR  | 119 |
| ○ Compound <b>3ae</b> <sup>13</sup> C NMR | 120 |
| ○ Compound <b>3ae</b> <sup>19</sup> F NMR | 121 |
| ○ Compound <b>3af</b> <sup>1</sup> H NMR  | 122 |
| ○ Compound <b>3af</b> <sup>13</sup> C NMR | 123 |
| ○ Compound <b>3ag</b> <sup>1</sup> H NMR  | 124 |
| ○ Compound <b>3ag</b> <sup>13</sup> C NMR | 125 |
| ○ Compound <b>3ah</b> <sup>1</sup> H NMR  | 126 |
| ○ Compound <b>3ah</b> <sup>13</sup> C NMR | 127 |
| ○ Compound <b>3ai</b> <sup>1</sup> H NMR  | 128 |

|                                           |     |
|-------------------------------------------|-----|
| ○ Compound <b>3ai</b> <sup>13</sup> C NMR | 129 |
| ○ Compound <b>3aj</b> <sup>1</sup> H NMR  | 130 |
| ○ Compound <b>3aj</b> <sup>13</sup> C NMR | 131 |
| ○ Compound <b>3ak</b> <sup>1</sup> H NMR  | 132 |
| ○ Compound <b>3ak</b> <sup>13</sup> C NMR | 133 |
| ○ Compound <b>3al</b> <sup>1</sup> H NMR  | 134 |
| ○ Compound <b>3al</b> <sup>13</sup> C NMR | 135 |

## 1. Chemicals

NiI<sub>2</sub>·xH<sub>2</sub>O (x = 3.5 by elemental analysis) and anhydrous sodium iodide were purchased from Strem and used as received. It is important to note that the stoichiometry of NiI<sub>2</sub> hydrate is variable. We found that *excess nickel is not detrimental to the isolated yield of product*, but we obtained lower yields in reactions employing excess ligands. Therefore, we employed slight excess (0.107 equiv [Ni] to 0.100 mol% [ligands] or 0.054 equiv [Ni] to 0.050% [ligands]) in our reactions to account for the variable nickel stoichiometry.

4,4'-Dimethoxy-2, 2'-bipyridine, 1,10-phenanthroline, zinc dust (<10 micron), ethyl 4-bromobutyrate, 4-bromo-N,N-dimethyl aniline, 4-bromoaniline, 1,4-dibromobenzene, 4-bromoanisole, 4-bromophenol, 2-bromotoluene, bromobenzene, 1-bromo-4-fluorobenzene, 4-bromobenzotrifluoride, 4-bromophenylboronic acid, 4-bromobenzonitrile, 4'-bromoacetophenone, 3-bromoanisole, chlorobenzene, 1-chloronaphthalene (tech. grade), methyl 4-chlorobenzoate, 4-chlorobenzonitrile, 3-bromopropyl amine hydrobromide, 2-ethylhexyl bromide, 2-bromomethyl-1,3-dioxolane, 2-chloro-6-methylpyridine, anhydrous pyridine, *p*-toluenesulfonyl chloride, acetyl chloride, 2-bromo-1-butene, cyclopentyl bromide, cycloheptyl bromide, 2-bromoheptane, benzyl alcohol, 4-bromobutyric acid, *n*-butyl lithium (1.6 M in hexanes), dichlorodimethylsilane, were purchased from Aldrich and used as received.

5-Bromo-2-methyl-2-pentene, (*E*)-2-bromo-2-butene, and (*Z*)-2-bromo-2-butene were purchased from Aldrich and filtered through a short basic alumina pad (1.5 cm) in a pipette packed with glass wool prior to use.

2-Bromoethanol and 4-chlorobenzotrifluoride were purchased from TCI and used as received.

2-Chloro-5-(trifluoromethyl)benzonitrile, 4-chlorophenyl methyl sulfone were purchased from Acros and used as received.

Ethyl 3-bromobenzoate, 4'-chloroacetophenone, and 3-bromopropylboronic acid pinacol ester, 2-bromo-1-butene were purchased from Alfa Aesar and used as received.

*Tert*-butyl-dimethylchlorosilane was purchased for Gelest and used as received.

1-Bromo-2-methylpropene was purchased from Synthonix and used as received.

Octylbenzene [2189-60-8],<sup>1</sup> 3-bromopropyl-carbamic acid tert-butyl ester [83948-53-2],<sup>2</sup> (3-bromopropyl)carbamic acid benzyl ester [39945-54-5],<sup>3</sup> p-bromophenylboronic pinacol ester [68716-49-4],<sup>4</sup> (2-bromoethoxy)(tert-butyl)dimethylsilane [86864-60-0],<sup>5</sup> N-acetyl-5-bromoindole [61995-52-6],<sup>6</sup> (4-bromophenyl)trimethylstannane [937-11-1],<sup>7</sup> 4-bromophenyl 4-methylbenzenesulfonate [6324-15-8],<sup>8</sup> 4-acetoxybromobenzene [1927-95-3],<sup>9</sup> 4-bromophenyl trifluoromethanesulfonate [66107-30-0],<sup>10</sup> 1-bromo-4-N-(p-toluenesulfonamido)benzene [32857-48-0],<sup>11</sup> benzyl 4-bromobutanoate [126430-46-4],<sup>12</sup> were synthesized according to the literature procedures and spectral data were in agreement with the reported values.

**Solvents.** DMPU (1,3-Dimethyl-3,4,5,6-tetrahydro-2(1*H*)-pyrimidinone, absolute, over molecular sieve (H<sub>2</sub>O ≤ 0.03%), ≥ 99.0% (GC) was purchased from Aldrich or AK Scientific, and in most cases was used as received. Although sequential drying of DMPU over 4 Å molecular sieves before use could reduce water content to as low as 16 ppm, successful reactions were observed in DMPU containing as much as 1000 ppm water. The solvent can be stored on the bench over molecular sieves (4 Å) for extended periods of time (weeks) without detrimental effects on the yield of the cross-coupling reaction.

One lot received from Aldrich was a pale yellow color instead of a colorless liquid. Reactions run using this yellow DMPU resulted in lower yields. Impure DMPU can be purified by short path distillation from calcium hydride, followed by drying over molecular sieves (4 Å). The resulting material is colorless, dry (typically <100 ppm H<sub>2</sub>O by Karl-Fischer titration, Metrohm), and provides the expected yields.

All other dry solvents were prepared from ACS grade, inhibitor free solvents by passage through activated alumina and molecular sieves in a Vacuum Atmospheres solvent purification system. Water content was routinely measured using Karl-Fisher titration (Metrohm) and was less than 50 ppm in all cases.

**Zinc.** While we obtained good yields with a variety of zinc sources, one lot of zinc dust (< 10 um) purchased from Aldrich resulted in long induction periods and reaction times (> 48 h) for the catalytic cross coupling reactions. Additionally, zinc dust (< 10 um) that had remained on the bench and exposed to air in chemical inventory for extended periods for time (months to years) also resulted in long induction periods and reaction times. However, the problem of inactive zinc could be remedied by (1) careful activation with acid (listed directly below) or (2) the addition of

<sup>1</sup> Everson, D. A.; Shrestha, R.; Weix, D. J., *J. Am. Chem. Soc.* **2010**, *132*, 920-921.

<sup>2</sup> Georgiades, S. N.; Clardy, J., *Org. Lett.* **2005**, *7*, 4091-4094.

<sup>3</sup> Robarge, M. J.; Husbands, S. M.; Kieltyka, A.; Brodbeck, R.; Thurkauf, A.; Newman, A. H., *J. Med. Chem.* **2001**, *44*, 3175-3186.

<sup>4</sup> Koolmeister, T.; Södergren, M.; Scobie, M., *Tetrahedron Lett.* **2002**, *43*, 5965-5968.

<sup>5</sup> Kuwabe, S.-i.; Torraca, K. E.; Buchwald, S. L., *J. Am. Chem. Soc.* **2001**, *123*, 12202-12206.

<sup>6</sup> Phipps, R. J.; Grimster, N. P.; Gaunt, M. J., *J. Am. Chem. Soc.* **2008**, *130*, 8172-8174.

<sup>7</sup> Deushi, T.; Takahashi, Y.; Ishiwata, H.; Okuno, Y.; Oda, T.; Shiratsuchi, M.; Yamamoto, K. (Kowa Co. Japan). Azoxy Compound. US Patent 5,541,169, July 30, 1996.

<sup>8</sup> Zim, D.; Lando, V. R.; Dupont, J.; Monteiro, A. L. *Org. Lett.* **2001**, *3*, 3049-3052

<sup>9</sup> Johnson, A. T.; Wang, L.; Standeven, A. M.; Escobar, M.; Chandraratna, R. A. S. *Bioorg. Med. Chem.* **1999**, *7*, 1321-1338.

<sup>10</sup> Echavarren, A. M.; Stille, J. K. *J. Am. Chem. Soc.* **1987**, *109*, 5478-5486.

<sup>11</sup> McKeown, S. C.; Hall, A.; Blunt, R.; Brown, S. H.; Chessell, I. P.; Chowdhury, A.; Giblin, G. M. P.; Healy, M. P.; Johnson, M. R.; Lorthioir, O.; Michel, A. D.; et al. *Bioorg. Med. Chem.* **2007**, *17*, 1750-1754.

<sup>12</sup> Notre, J. L.; Mele, D. V.; Frost, C. G. *Adv. Synth. Catal.* **2007**, *349*, 432-440.

catalytic amounts of TMSCl and 1,2-dibromoethane directly to the reaction mixture (detailed on page S-9).

**Zinc activation with acid.** Zinc dust (120 g) was washed with 2% aqueous HCl (300 mL) for 1 min in a 400 mL beaker. It is important that the zinc not be exposed to the acidic solution for more than ~1 min. We found that longer exposure times resulted in zinc dust that was too active, which resulted in diminished yields of cross-coupled product and increased amounts of hydrodehalogenation. The zinc was collected by vacuum filtration and washed with water (3 × 200 mL), ethanol (200 mL), and ether (200 mL). Any clumps of zinc were lightly broken-up by crushing in a mortar and pestle (grinding also appeared to make the zinc too reactive). The zinc was dried in an oven for 30 min at 150 °C.

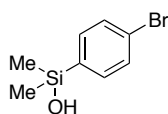

**p-Bromophenyl-dimethylsilanol** [18246-02-1]<sup>13</sup> was prepared in analogy to a published procedure.<sup>14</sup> A 100 mL round bottom flask equipped with a teflon coated magnetic stir bar was flame dried and cooled under argon. 1,4-dibromobenzene (1.5 g, 6.5 mmol) was dissolved in dry ether (50 mL). Under an argon atmosphere at room temperature *n*-butyllithium (1.6M in hexanes, 4.0 mL, 6.5 mmol) was added slowly over the course of 5 minutes to generate the monoanion. A separate 2-neck 100 mL round bottom flask equipped with a teflon coated magnetic stir bar, a septum on one neck and a reflux condenser on the other neck was flame dried and cooled under argon. The two-neck flask was then charged with dichlorodimethylsilane (719 μL, 7.8 mmol) and dry ether (5 mL). Next, the reaction solution was slowly transferred over 30 minutes by cannula to the two-neck round bottom flask, causing a white precipitate to form. After the addition was complete the septum on the 2-neck flask was replaced with a glass stopper and the reaction mixture was heated to 50 °C for 18 h. After allowing the reaction to cool to room temperature saturated ammonium chloride (20 mL) was added causing the white precipitate to dissolve after stirring. The contents of the flask were transferred to a separatory funnel; the organics were collected and washed with saturated ammonium chloride (20 mL), water (20 mL), and brine (20 mL) before drying over MgSO<sub>4</sub>, filtering and concentrating. The crude material was purified by chromatography on silica gel (8:2 hexanes: ethyl acetate, R<sub>f</sub> = 0.35, stains with KMnO<sub>4</sub>) to give 464 mg of faintly yellow oil (31%).

<sup>1</sup>H-NMR (500 MHz; CDCl<sub>3</sub>): δ 7.51 (d, *J* = 7.8 Hz, 2H), 7.43 (d, *J* = 7.9 Hz, 2H), 2.33 (s, 1H), 0.38 (s, 6H).

<sup>13</sup>C-NMR (126 MHz; CDCl<sub>3</sub>): δ 138.0, 134.8, 131.2, 124.6, 0.1.

GC-MS *m/z* (% relative intensity, ion): 231.95 (17.48, M<sup>+</sup>), 216.85 (99.35, M<sup>+</sup>-CH<sub>3</sub>), 214.90 (100.00, M<sup>+</sup>-CH<sub>3</sub>), 77.00 (18.17, M<sup>+</sup>-C<sub>2</sub>H<sub>7</sub>BrOSi).

<sup>13</sup> Aoki, Toshiki; Watanabe, Jun; Ishimoto, Yoshiyuki; Oikawa, Eizo; Hayakawa, Yoshio; Nishida, Masakazu *J. Fluorine Chem.*, **1992**, 59, 285-288.

<sup>14</sup> Aoki, T.; Watanabe, J.; Ishimoto, Y.; Oikawa, E.; Hayakawa, Y.; Nishida, M. *J. Fluorine Chem.* **1992**, 59, 285-288.

## 2. Analytical Methods

NMR chemical shifts are reported in ppm and referenced to the residual solvent peak  $\text{CDCl}_3$  ( $\delta = 7.26$  ppm  $^1\text{H}$  or  $\delta = 77.16$  ppm  $^{13}\text{C}$ ) as an internal standard or trifluorotoluene ( $\delta = 0.000$  ppm) as an external standard ( $^{13}\text{g}$ ). NMR spectra were recorded on Bruker model Avance NMR spectrometer operating at 400.13 MHz or 500.13 MHz proton NMR frequency, and data analysis was performed using the iNMR software package (version 4.0.4). In the  $^{13}\text{C}$  spectra of boron containing compounds (**3ag-ah**) the resonance corresponding to the carbon attached to boron was not observed.<sup>15</sup> The  $^1\text{H}$  NMR spectrum of **3o** and the  $^1\text{H}$  and  $^{13}\text{C}$  NMR spectra of **3al** contain peaks corresponding to long chain aliphatic hydrocarbons (grease).<sup>16</sup>

GC analyses of crude reaction mixtures were performed on an Agilent 7890A GC equipped with dual DB-5 columns (20 m x 180  $\mu\text{m}$  x 0.18  $\mu\text{m}$ ), dual FID detectors and using hydrogen as the carrier gas. The analysis method used in all cases was 1  $\mu\text{L}$  inj. of sample, inj. temp of 300  $^\circ\text{C}$ , 100:1 split ratio, initial inlet pressure was 20.3 psi but varied as the column flow was held constant at 1.8 mL/min for the duration of the run. Initial oven temperature of 50  $^\circ\text{C}$  was held for 0.46 min followed by a temperature ramp up to 300  $^\circ\text{C}$  at 65  $^\circ\text{C}/\text{min}$  and finally the temperature was held at 300  $^\circ\text{C}$  for 0.69 min. Total run time was  $\sim 5$  min. FID temperature was 325  $^\circ\text{C}$ .

GC analyses of crude reaction mixtures for competition experiments were performed on an Agilent 7890A GC equipped with dual DB-5 columns (20 m x 180  $\mu\text{m}$  x 0.18  $\mu\text{m}$ ), dual FID detectors and using hydrogen as the carrier gas. The analysis method used for experiments employing 4-fluorobromobenzene, 3-bromoanisole, ethyl-3-bromobenzoate, 4-fluorobenzotrifluoride and 4'-bromoacetophenone was 1  $\mu\text{L}$  inj. of sample, inj. temp of 300  $^\circ\text{C}$ , 100:1 split ratio, initial inlet pressure was 20.3 psi but varied as the column flow was held constant at 1.8 mL/min for the duration of the run. Initial oven temperature of 50  $^\circ\text{C}$  was held for 1.0 min followed by a temperature ramp up to 300  $^\circ\text{C}$  at 30  $^\circ\text{C}/\text{min}$  and finally the temperature was held at 300  $^\circ\text{C}$  for 0.69 min. Total run time was  $\sim 9.5$  min. FID temperature was 325  $^\circ\text{C}$ . The competition experiment employing 4-bromoanisole used the same GC analysis used for evaluating crude reaction mixtures (described above).

GC/MS analyses were performed on a Shimadzu GCMS-QP2010 equipped with an RTX-XLB column (30 m x 0.25 mm x 0.28  $\mu\text{m}$ ) with a quadrupole mass analyzer using helium as the carrier gas. The analysis method used in all cases was 5  $\mu\text{L}$  inj. of sample, inj. temp of 225  $^\circ\text{C}$ , 25:1 split ratio, initial inlet pressure was 7.8 psi, but varied as the column flow was held constant at 1.0 mL/min for the duration of the run, the interface temperature was held at 250  $^\circ\text{C}$ , and the ion source (EI, 30 eV) was held at 250  $^\circ\text{C}$ . Initial oven temperature was held at 50  $^\circ\text{C}$  for 3 min with the detector off followed by a temperature ramp, with the detector on, to 280  $^\circ\text{C}$  at 40  $^\circ\text{C}/\text{min}$ , and finally the temperature was held at 280  $^\circ\text{C}$  for 3 min. Total run time was 11.75 min. For compounds **3aa** and **3ad** the method was modified to hold the final temperature of 280  $^\circ\text{C}$  for 8 min.

<sup>15</sup> Boebel, T. A.; Hartwig, J. F. *J. Am. Chem. Soc.* **2008**, *130*, 7534-7535.

<sup>16</sup> Gottlieb, H. E.; Vadim, K.; Nudelman, A. *J. Org. Chem.*, **1997**, *62*, 7512-7515.

Chromatography was performed on silica gel (EMD, silica gel 60, particle size 0.040-0.063 mm) using standard flash techniques. Products were visualized by one of the following methods: UV stain, ninhydrin stain, KMnO<sub>4</sub> stain, iodine stain, or by GC.

### 3. General Procedures for Reductive Cross-Coupling Reactions

#### Optimization and Control Reactions.

Reactions were set upon the bench-top without any precautions to exclude air or moisture. To a 1-dram vial containing a teflon-coated stir-bar was added the required amount of appropriate catalyst and ligand(s) followed by DMPU (2 mL), pyridine, organohalide(s) (0.500 mmol each), Zn<sup>0</sup> dust (>10 μm, 2.00 equiv), and dodecane (10.0 μL internal standard). The reaction vials were capped with a PTFE-faced silicone septum, and heated in a reaction block on the bench-top. After 15-41 h reaction time, 10-50 μL aliquots of reaction mixture were removed with a 50 μL gas-tight syringe and quenched with 10-50 μL of 1 M aqueous NaHSO<sub>4</sub>, diluted with ethyl ether or ethyl acetate (1 mL), and filtered through a short silica pad (1.5 cm) in a pipette packed with glass wool. The filtrate was analyzed by gas chromatography and percent yield or percent conversion based on unreacted starting material was calculated.

#### GC response factor for 1-bromooctane (2) and 1-phenyloctane (3)

The GC response factor for **3** was determined by making standard solutions of **3** with the internal standard dodecane in volumetric flasks using ether as the solvent. The response factor (R<sub>f</sub>) was calculated from equation (1):

$$R_f = (\text{analyte signal})([\text{dodecane}]) / ([\text{analyte}])(\text{dodecane signal}) \quad (1)$$

| Analyte                     | [Analyte]<br>mM | Analyte<br>Signal (pA*s) | [dodecane] | Dodecane<br>signal (pA*s) | Response<br>factor (R <sub>f</sub> ) | Average |
|-----------------------------|-----------------|--------------------------|------------|---------------------------|--------------------------------------|---------|
| 1-phenyloctane ( <b>3</b> ) | 0.00124         | 542.2475                 | 0.00174    | 44.90781                  | 1.141                                | 1.183   |
|                             | 0.00994         | 379.89758                | 0.00120    | 43.59599                  | 1.050                                |         |
|                             | 0.00752         | 316.98511                | 0.00110    | 37.45347                  | 1.235                                |         |
|                             | 0.00500         | 72.07383                 | 0.00113    | 13.80404                  | 1.177                                |         |
|                             | 0.00248         | 48.28048                 | 0.00122    | 18.07833                  | 1.310                                |         |
| 1-bromooctane ( <b>2</b> )  | 0.01125         | 245.24623                | 0.00132    | 47.55844                  | 0.605                                | 0.627   |
|                             | 0.00843         | 189.69733                | 0.00132    | 46.93354                  | 0.633                                |         |
|                             | 0.00562         | 125.32188                | 0.00132    | 45.38866                  | 0.649                                |         |
|                             | 0.00281         | 60.75986                 | 0.00132    | 45.94073                  | 0.621                                |         |

#### General procedure for preparative reactions.

##### Reactions run with un-activated zinc.

***On the bench-top with no precaution to exclude air or moisture*** NiI<sub>2</sub>xH<sub>2</sub>O (x = 3.5, MW = 375.56 determined by elemental analysis, 15.1-30.2 mg, 0.040-0.080 mmol, 0.053-0.107 equiv) 4,4'-dimethoxy-2, 2'-bipyridine (for electron rich aryl halides, 8.1-16.2 mg, 0.0375-0.0750 mmol, 0.050-0.100 equiv) or 1,10-phenanthroline (for electron poor aryl halides, 6.8-13.6 mg, 0.0377-0.0750 mmol, 0.050-0.100 equiv), sodium iodide (28.5 mg, 0.190 mmol, 0.250 equiv), and solid substrates (0.75 mmol, 1.00 equiv) were weighed on weigh paper and



transferred to a 1 dram vial equipped with a magnetic stir bar. Solvent, DMPU (1,3-Dimethyl-3,4,5,6-tetrahydro-2(1*H*)-pyrimidinone (3.0 mL), pyridine (3-6  $\mu$ L, 0.039-0.0775 mmol, 0.052-0.103 equiv), liquid reagents, and zinc dust (>10  $\mu$ m, 98 mg, 1.50 mmol, 2.00 equiv) were added. The reaction vials were capped with a PTFE-faced silicone septum, and the generally green solution was stirred at room temperature for approximately 5 min. before heating to 60 or 80  $^{\circ}$ C in a reaction block on the bench-top.

The reaction progress was followed by GC analysis. At appropriate times 10  $\mu$ L aliquots of reaction mixture were removed with a 10  $\mu$ L gas-tight syringe and quenched with 50  $\mu$ L of 1 M aqueous NaHSO<sub>4</sub>, diluted with ethyl ether or ethyl acetate (1 mL), and filtered through a short silica pad (1.5 cm) in a pipette packed with glass wool. The filtrate was analyzed by gas chromatography.

The reactions generally turn from green to black when complete (Figure S1). Upon completion (judged as <1 Area % of starting materials remaining by GC analysis) the entire reaction mixture was loaded onto a silica gel column for purification. The reaction vial was rinsed with ether and dichloromethane (1 mL each), which were also loaded on the column.

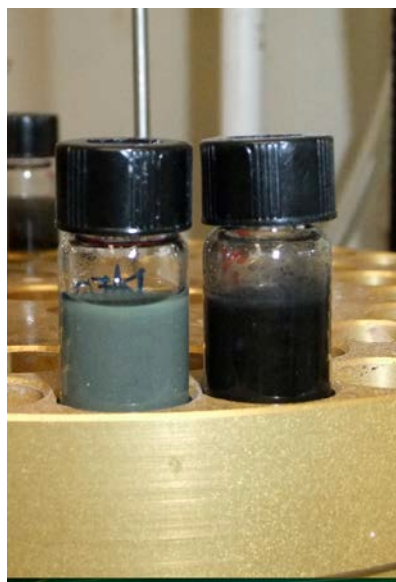

**Figure S1:** Reactions color change from gray-green (active reaction on the left) to black (complete reaction on the right), which reliably marks the end-point (complete consumption of both starting materials) of the reaction.

#### **Reactions run with activated zinc.**

The general procedure above for reactions run with un-activated zinc was followed except chlorotrimethylsilane and 1,2-dibromoethane (6  $\mu$ L each) were added sequentially as the last two reagents to the reaction vial. The reactions progressed normally and were followed in the same manner. The reaction color change from gray green to black occurred generally in 2-4 h compared 12-24 h for reactions run with un-activated zinc.

#### 4. Selectivity Data for the Reactions in Schemes 2-4

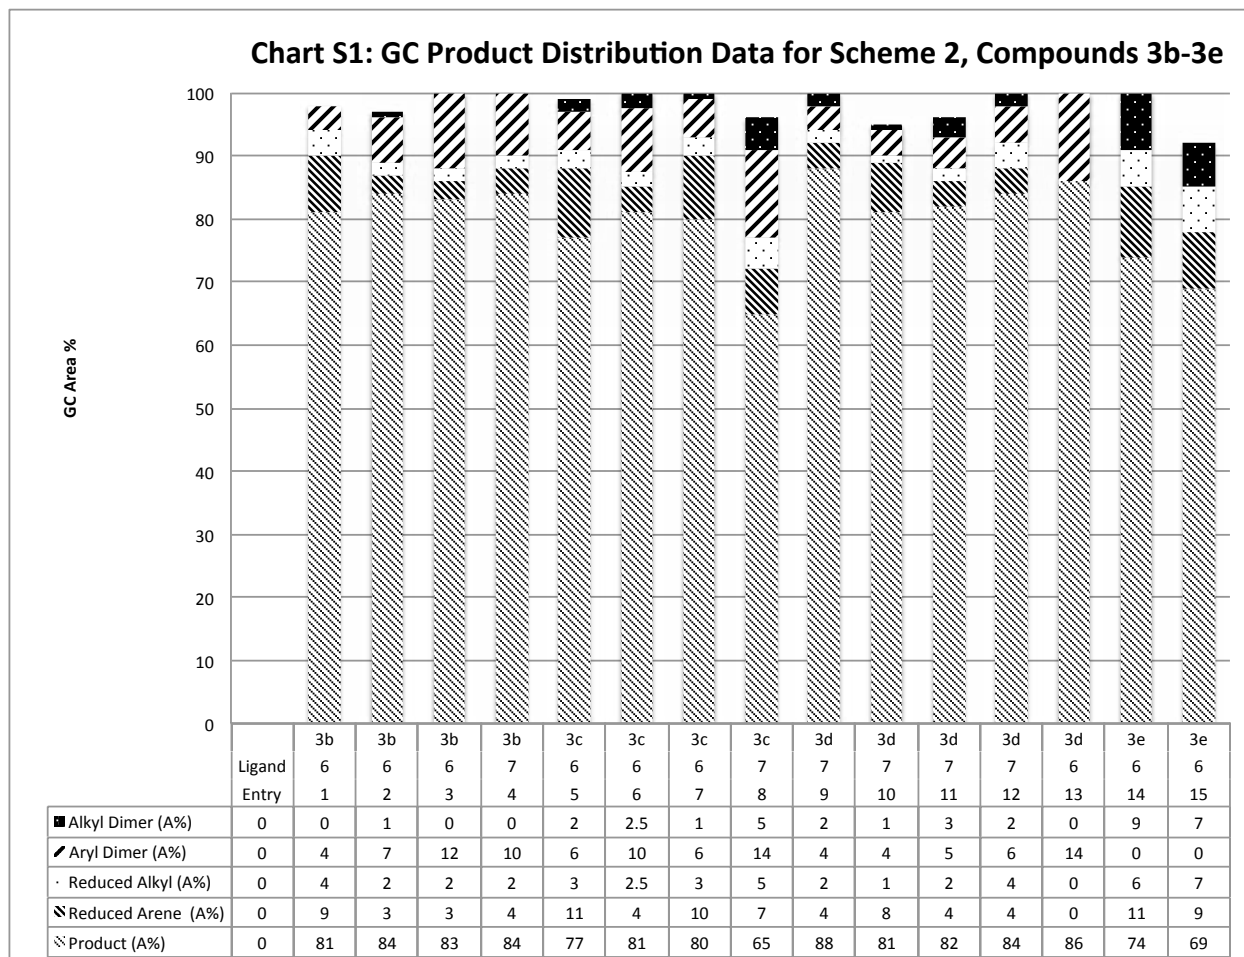

Area percent determined by GC from crude reaction mixtures. In cases where the A% is 0, a peak of <0.5 A% is present or no peak is observed and the retention time of the compound is known. Exceptions are the aryl dimer peak for **3e**, in which there is no assignable peak and retention time of the compound is unknown. Superscripts correspond to footnotes for the respective scheme in the manuscript.

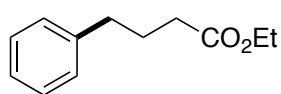

**3b**  
5 mol % **6**, 76%  
7 mol % **6**, 86%

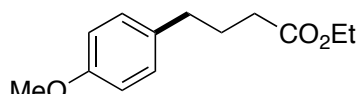

**3c**  
5 mol % **6**, 70%  
7 mol % **6**, 73%  
10 mol % **6**, 73%

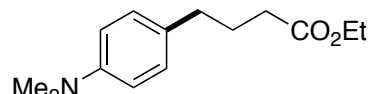

**3e**  
5 mol % **6**, 72%<sup>b</sup>

Chart S2: GC Product Distribution Data for Scheme 2, Compounds 3f-3l

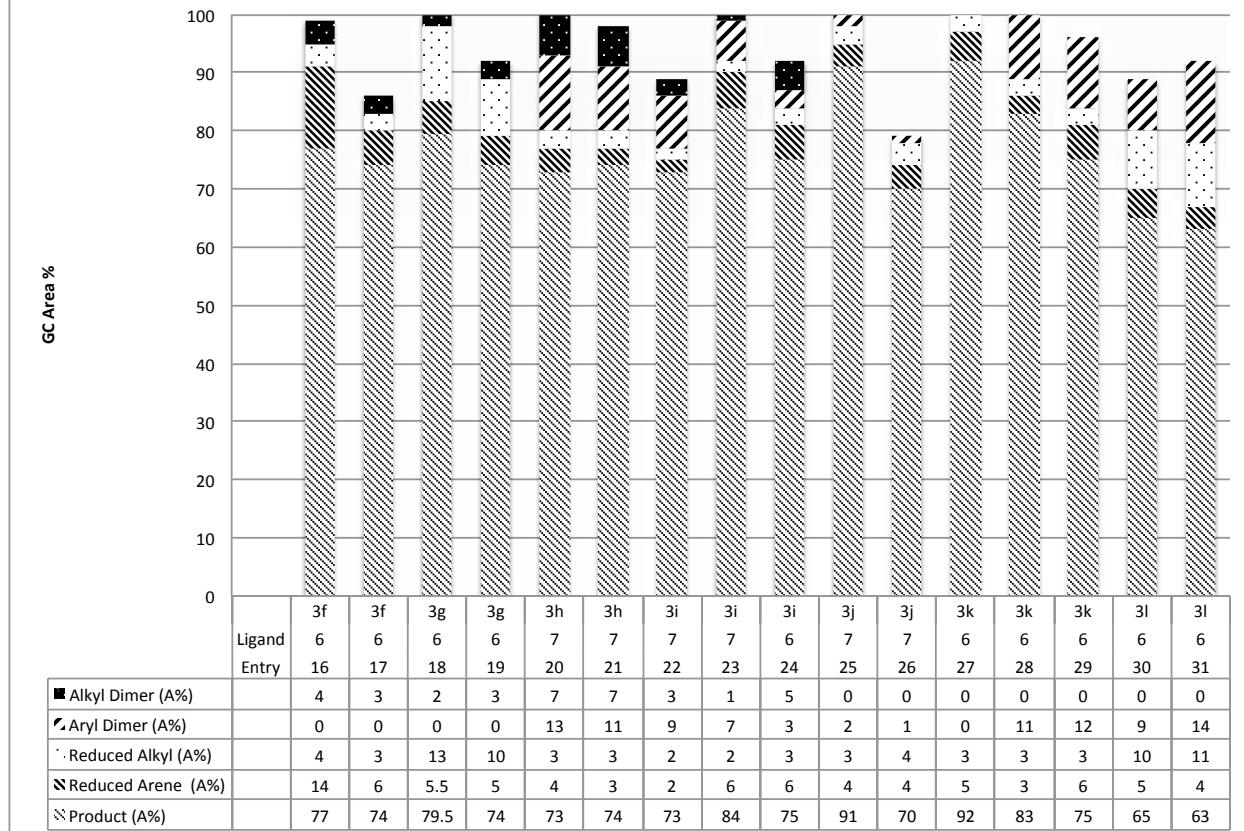

Area percent determined by GC from crude reaction mixtures. In cases where the A% is 0, a peak of <0.5 A% is present or no peak is observed and the retention time of the compound is known. The product and aryl dimer peaks co-elute for **3g**, and the reported area percent for product includes both compounds. Superscripts correspond to footnotes for the respective scheme in the manuscript.

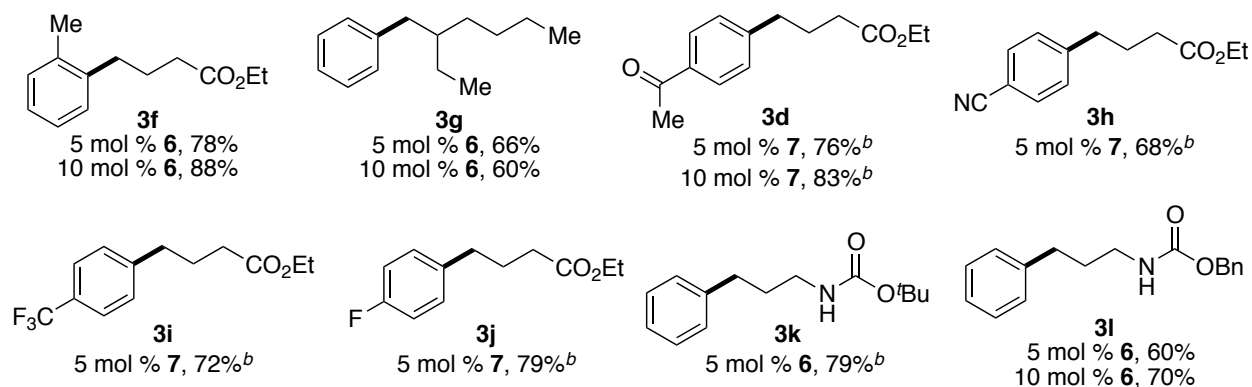

Chart S3: GC Product Distribution Data for Scheme 2, Compounds 3m-3v

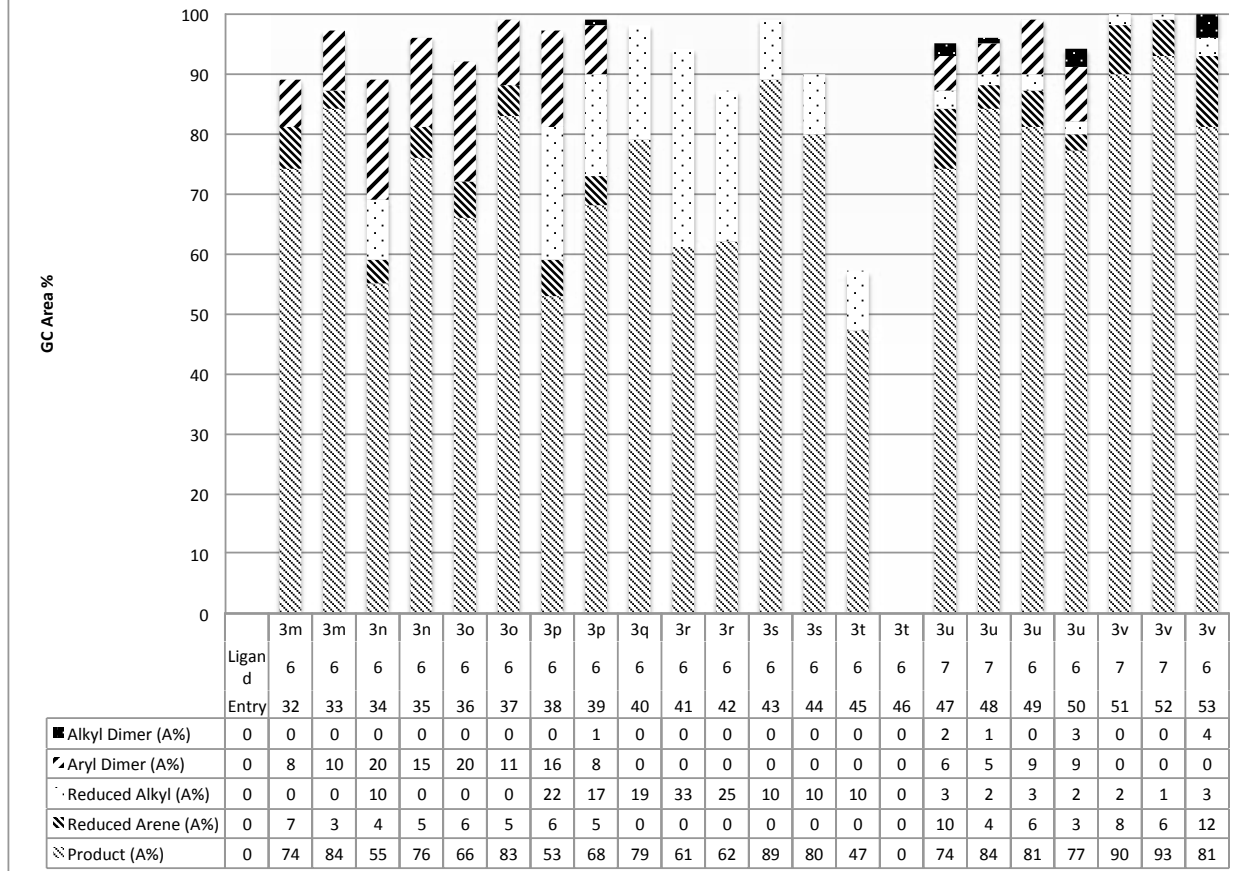

Area percent determined by GC from crude reaction mixtures. In cases where the A% is 0, a peak of <0.5 A% is present or no peak is observed and the retention time of the compound is known. Exceptions are the reduced alkyl for **3m** and **3o**, the reduced aryl, aryl dimer, and alkyl dimer for **3q-s**, in which there is no assignable peak and retention time of the compounds is unknown. Additionally, there is no data available for one run of product **3t**. Superscripts correspond to footnotes for the respective scheme in the manuscript.

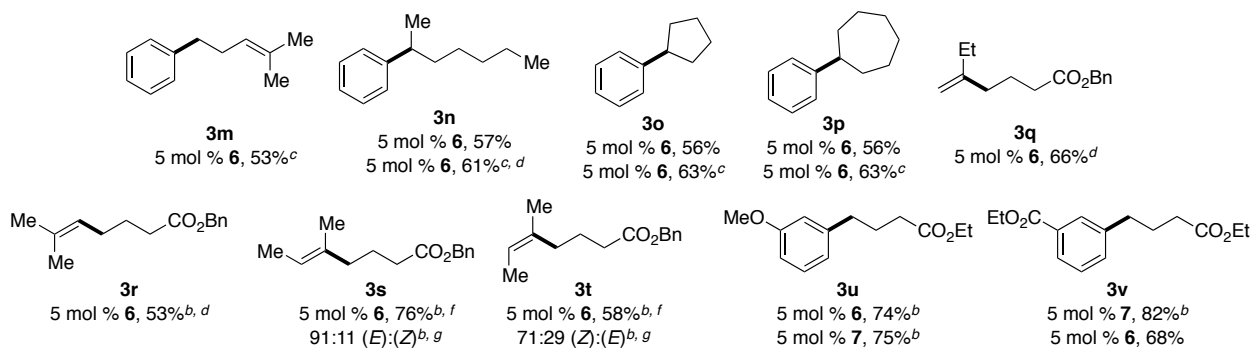

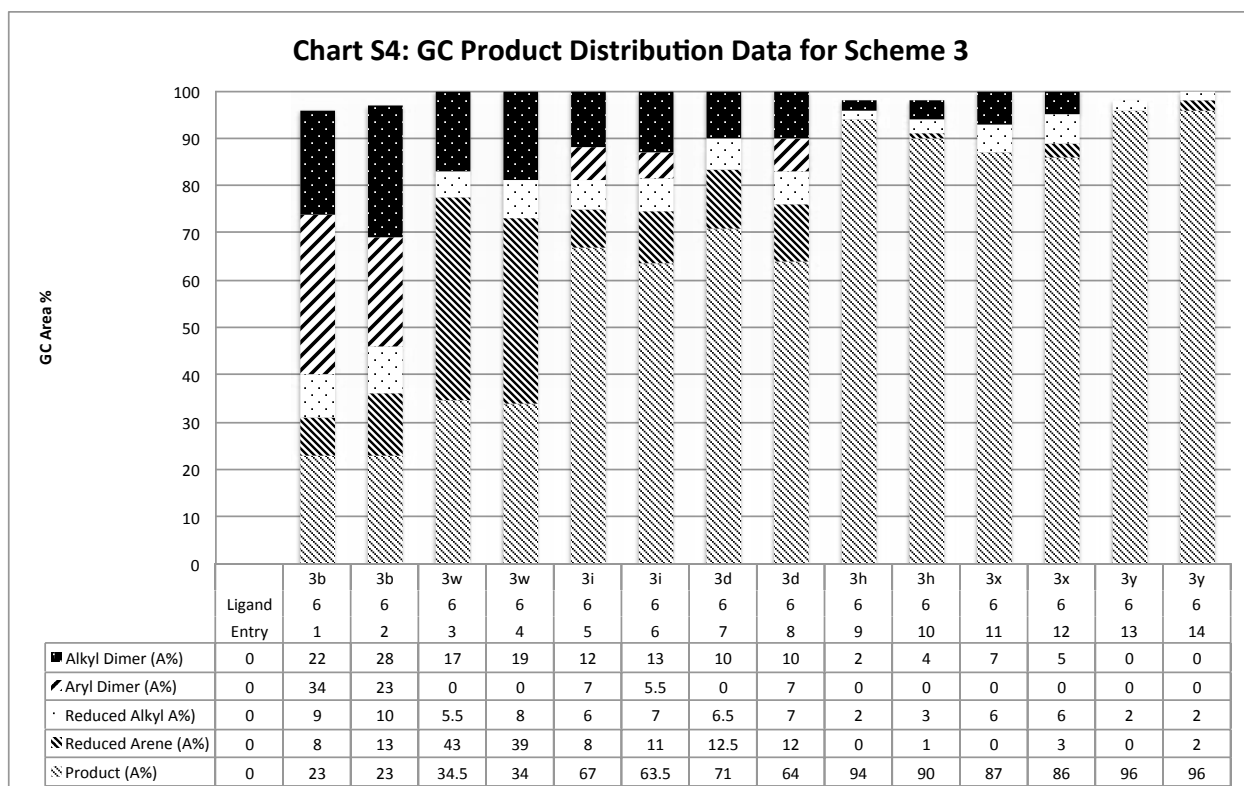

Area percent determined by GC from crude reaction mixtures. In cases where the A% is 0, a peak of <0.5 A% is present or no peak is observed and the retention time of the compound is known. Exceptions are the aryl dimer for **3w** and **3x**, in which there is no assignable peak and retention time of the compounds is unknown. Superscripts correspond to footnotes for the respective scheme in the manuscript.

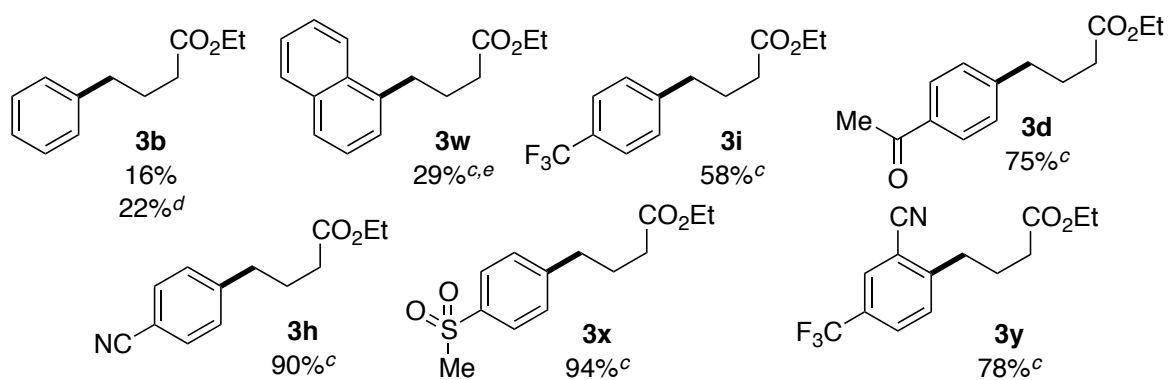

Chart S5: GC Distribution Data for Scheme 4, Compounds 3z-3ae

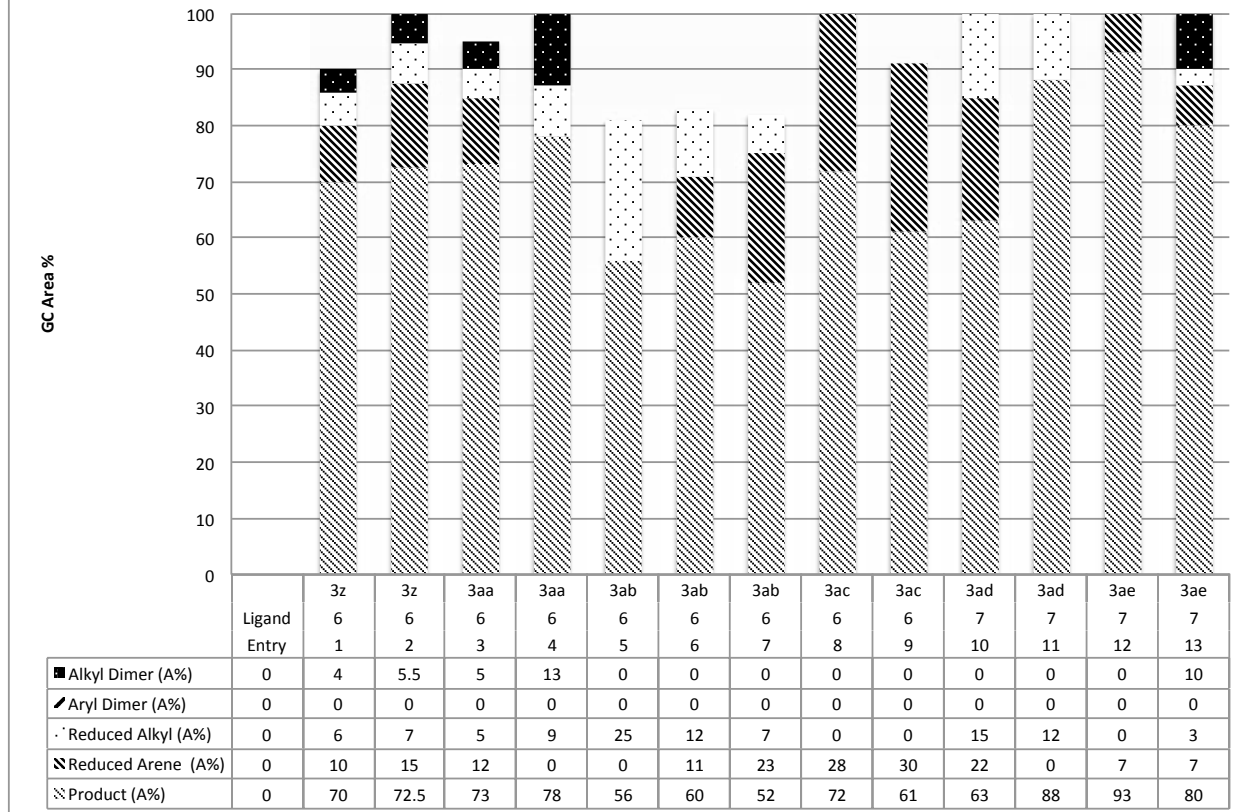

Area percent determined by GC from crude reaction mixtures. In cases where the A% is 0, a peak of <0.5 A% is present or no peak is observed and the retention time of the compound is known. Exceptions are the aryl dimer for **3aa**, **3ac-ae** in which there is no assignable peak and retention time of the compounds is unknown. Superscripts correspond to footnotes for the respective scheme in the manuscript.

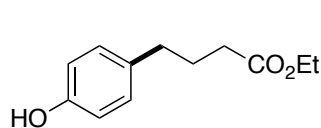

**3z**

5 mol % **6**, 74%<sup>c</sup>

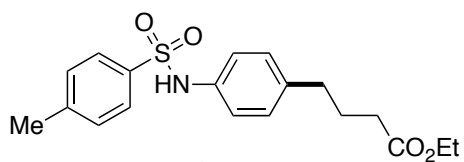

**3aa**

5 mol % **6**, 96%<sup>c</sup>

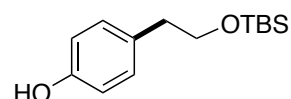

**3ab**

5 mol % **6**, 76%<sup>c, e</sup>  
5 mol % **6**, 65%<sup>f</sup>

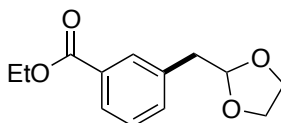

**3ac**

5 mol % **7**, 60%<sup>c, d</sup>

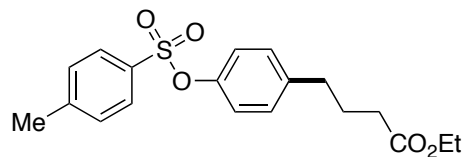

**3ad**

5 mol % **7**, 76%<sup>c</sup>

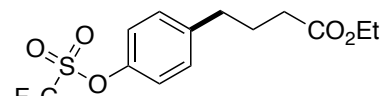

**3ae**

5 mol % **7**, 74%<sup>c</sup>

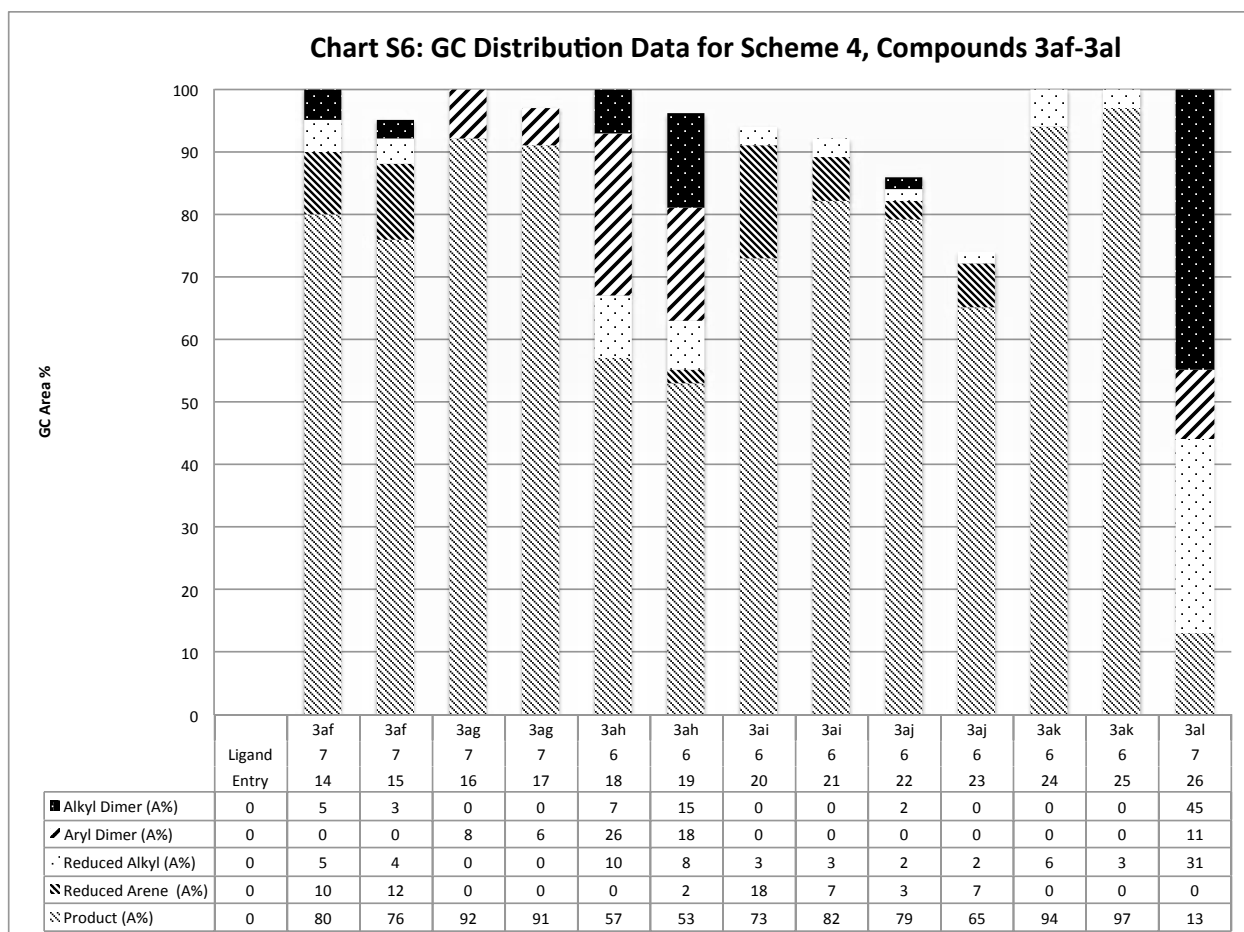

Area percent determined by GC from crude reaction mixtures. In cases where the A% is 0, a peak of <0.5 A% is present or no peak is observed and the retention time of the compound is known. Exceptions are the aryl dimer for **3af-ag** and **3ai-ak** in which there is no assignable peak and retention time of the compounds is unknown. Superscripts correspond to footnotes for the respective scheme in the manuscript.

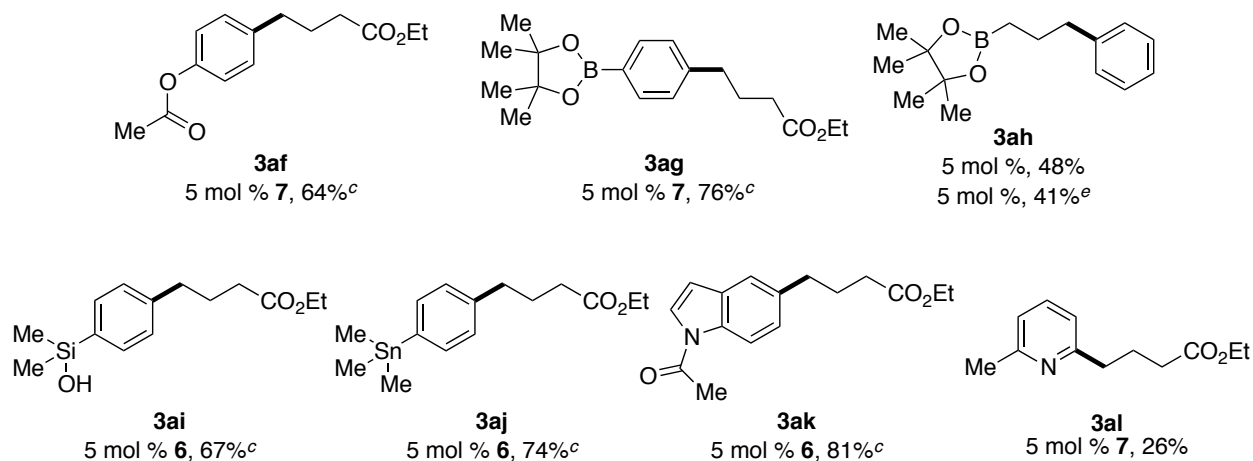

## 5. Hammett Study

### Reaction set-up and data collection.

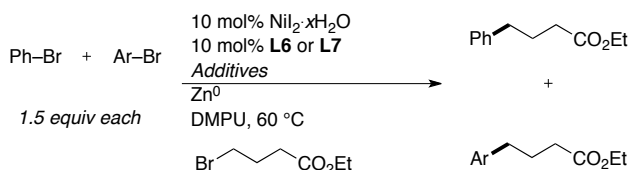

The general procedure was followed except for the use of two different aryl bromides (0.375 mmol, 1.50 equiv each) and ethyl 4-bromobutyrate (0.25 mmol, 1.00 equiv), dodecane (10  $\mu\text{L}$ , 0.044 mmol as internal standard), and the sequential addition of 1,2-dibromoethane (0.07 mmol, 0.28 equiv) and chlorotrimethylsilane (0.034 mmol, 0.136 equiv) as the last two reagents to activate the zinc. The reactions were heated at 60  $^\circ\text{C}$ , and the reaction progress were followed by GC analysis until complete consumption of alkyl bromide. At appropriate times 25  $\mu\text{L}$  aliquots of reaction mixture were removed with a 100  $\mu\text{L}$  gas-tight syringe and quenched with 25  $\mu\text{L}$  of 1 M aqueous  $\text{NaHSO}_4$ , diluted with ethyl ether (1 mL), and filtered through a short silica pad (1.5 cm) in a pipette packed with glass wool. The filtrate was analyzed by gas chromatography.

### Determination of $k_{rel}$ for six aryl bromides

The  $k_{rel}$  values were obtained by fitting the data to equation (2):

$$\ln([\text{ArBr}]_0/[\text{ArBr}]) = k_{rel}\ln([\text{PhBr}]_0/[\text{PhBr}]). \quad (2)$$

Chart S7:  $k_{rel}$  for 4-bromoanisole

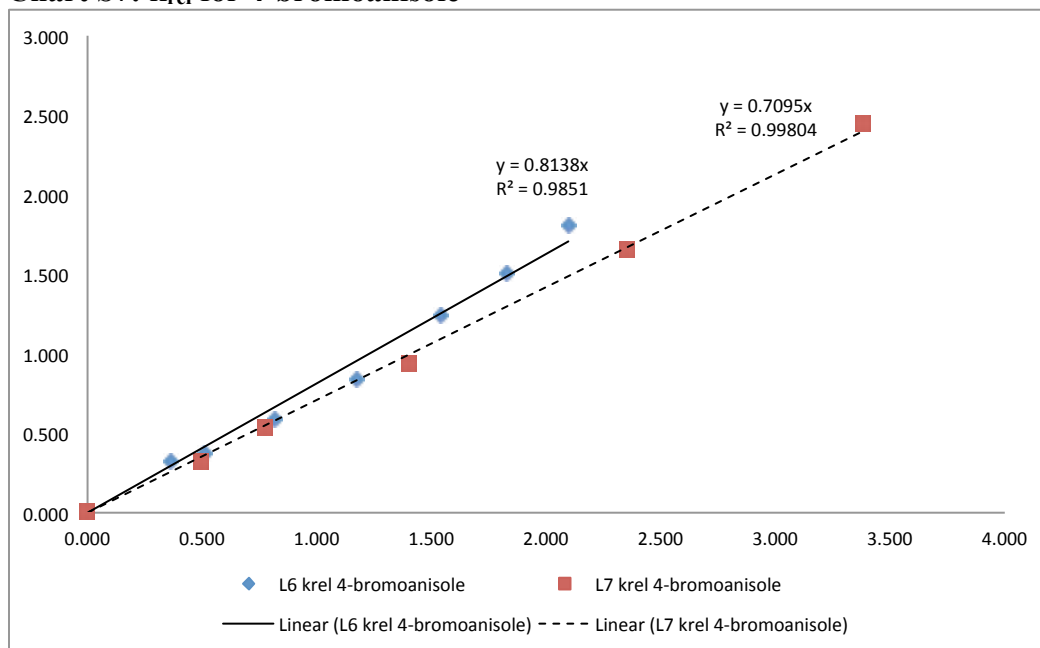



**Chart S8:  $k_{rel}$  for 4-fluorobromobenzene**

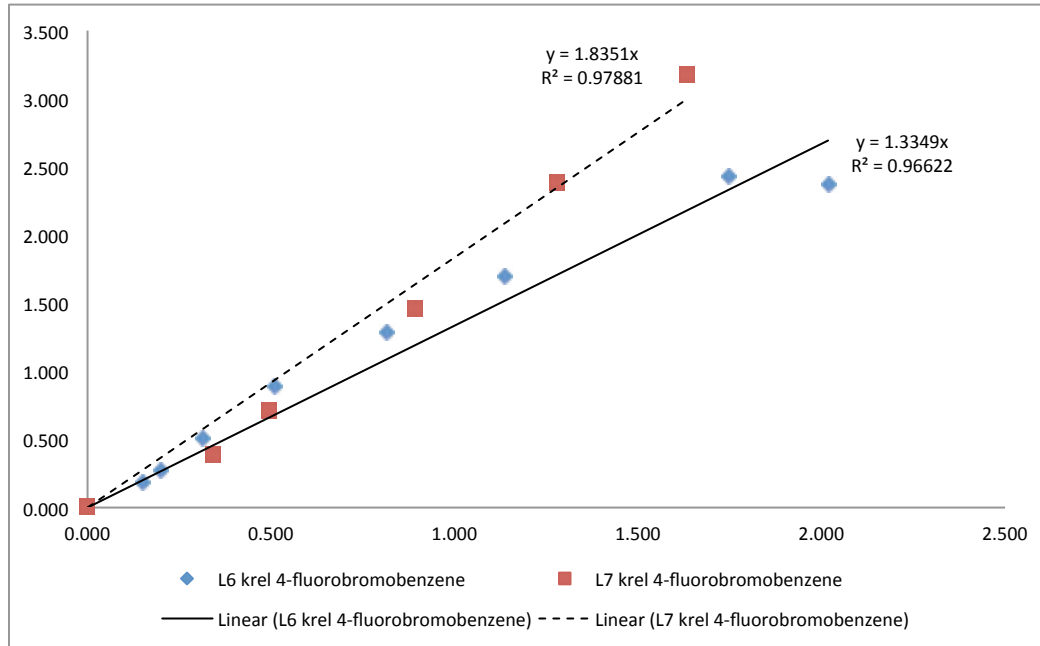

**Chart S9:  $k_{rel}$  for 3-bromoanisole**

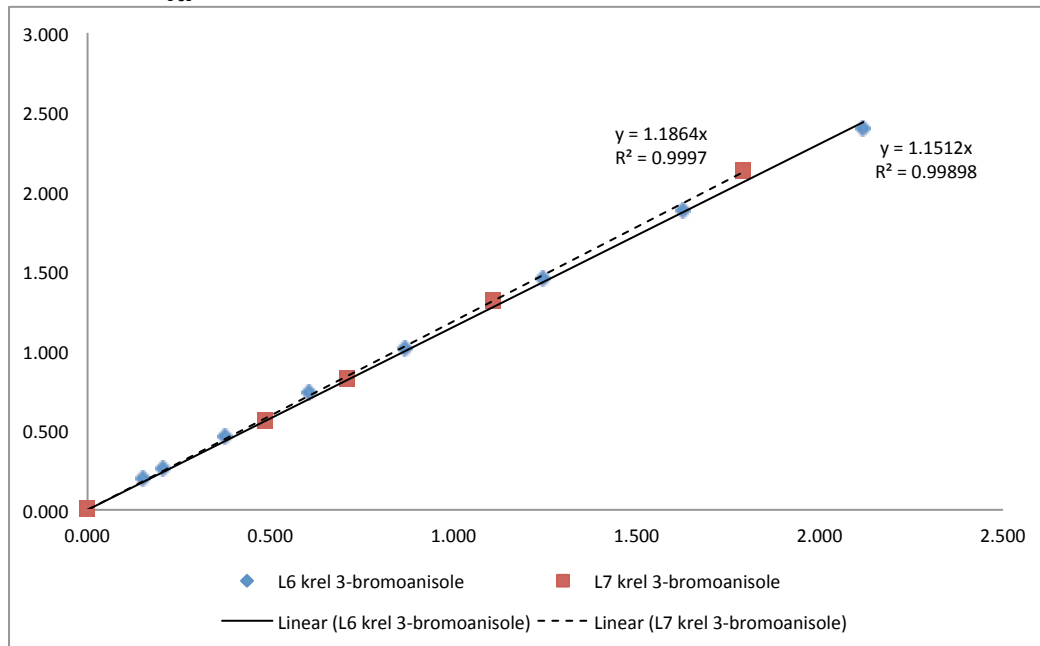

**Chart S10:  $k_{rel}$  for ethyl 3-bromobenzoate**

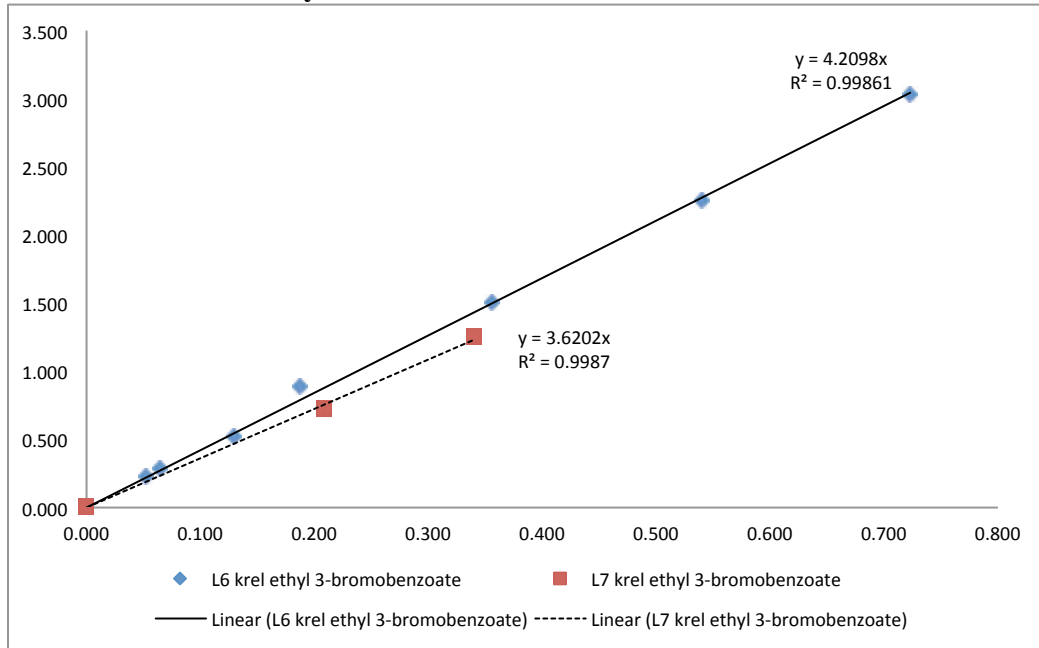

**Chart S11:  $k_{rel}$  for 4-bromobenzotrifluoride**

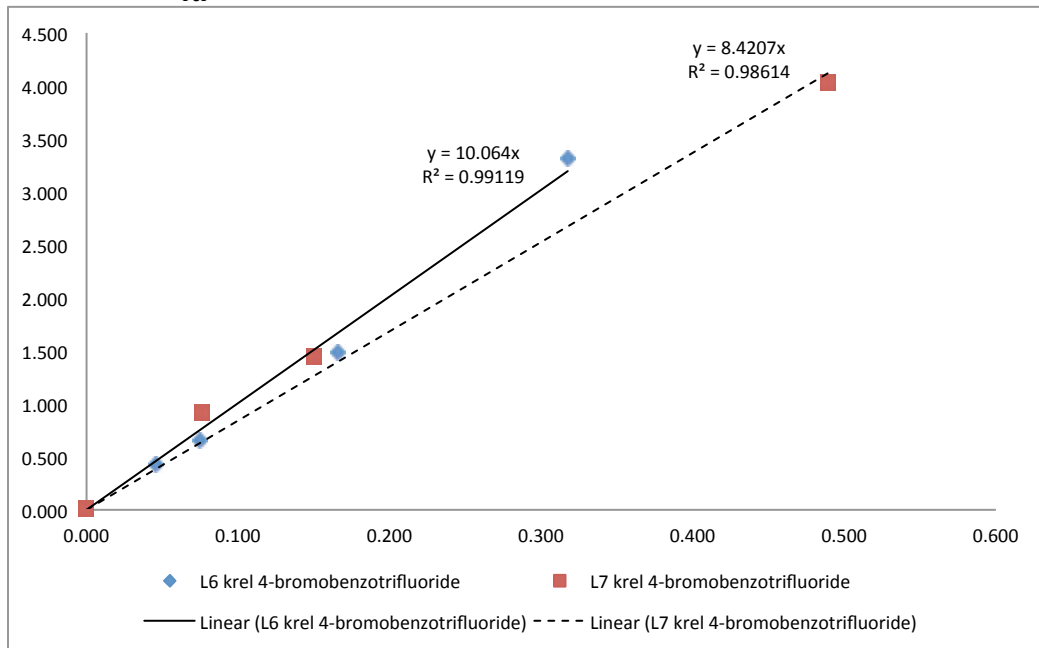

**Chart S12:  $k_{rel}$  for 4'-bromoacetophenone**

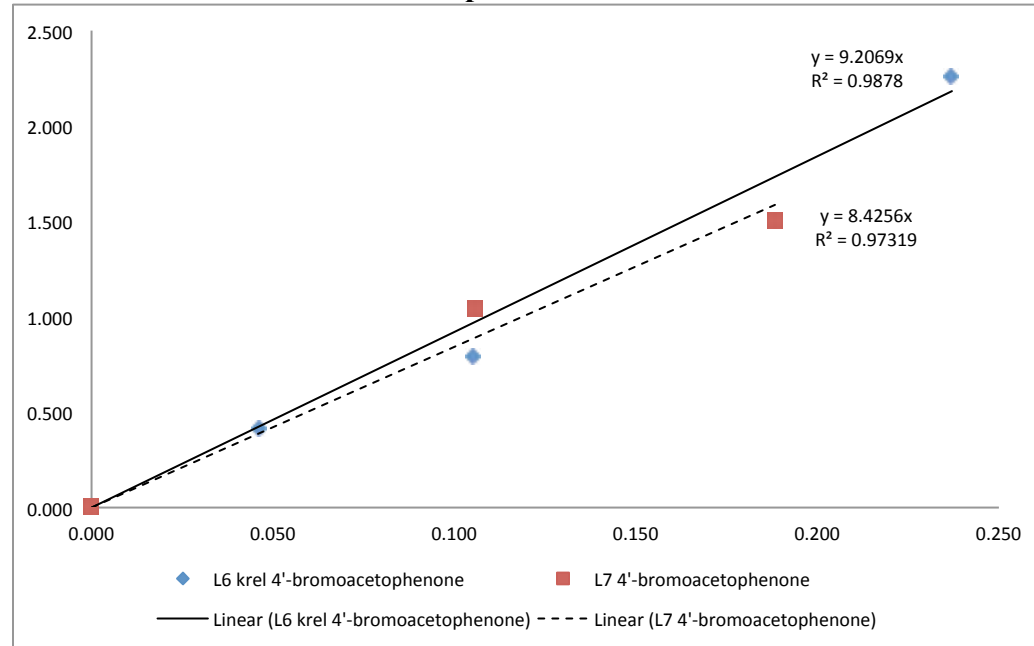

### GC response factors for aryl bromides used in Hammett study

The GC response factors for the aryl bromides used in the Hammett study were determined by making standard solutions of each aryl bromide with the internal standard in 100.00 mL volumetric flasks using hexanes as the solvent. The response factor ( $R_f$ ) was calculated from equation (1).

| Analyte                    | [Analyte]<br>mM | Analyte<br>Signal (pA*s) | [dodecane] | Dodecane<br>signal (pA*s) | Response<br>factor ( $R_f$ ) | Average |
|----------------------------|-----------------|--------------------------|------------|---------------------------|------------------------------|---------|
| bromobenzene ( <b>1a</b> ) | 0.01125         | 68.61488                 | 0.00132    | 15.07314                  | 0.534                        | 0.487   |
|                            | 0.00843         | 94.05482                 | 0.00132    | 34.61944                  | 0.425                        |         |
|                            | 0.00562         | 112.93882                | 0.00132    | 52.16728                  | 0.508                        |         |
|                            | 0.00281         | 54.63529                 | 0.00132    | 53.29126                  | 0.482                        |         |
| 4-bromoanisole             | 0.01125         | 200.53317                | 0.00132    | 47.86666                  | 0.492                        | 0.514   |
|                            | 0.00843         | 118.33664                | 0.00132    | 34.9503                   | 0.530                        |         |
|                            | 0.00562         | 84.66516                 | 0.00132    | 37.89532                  | 0.525                        |         |
|                            | 0.00281         | 26.36431                 | 0.00132    | 24.29691                  | 0.510                        |         |
| 3-bromoanisole             | 0.01125         | 213.93135                | 0.00132    | 43.73502                  | 0.574                        | 0.484   |
|                            | 0.00843         | 157.93858                | 0.00132    | 50.56739                  | 0.489                        |         |
|                            | 0.00562         | 111.9446                 | 0.00132    | 57.44534                  | 0.458                        |         |
|                            | 0.00281         | 52.17599                 | 0.00132    | 59.2877                   | 0.413                        |         |
| 4-fluoro-bromobenzene      | 0.01125         | 207.32381                | 0.00132    | 47.41028                  | 0.513                        | 0.501   |
|                            | 0.00843         | 149.09506                | 0.00132    | 47.09661                  | 0.496                        |         |
|                            | 0.00562         | 59.11299                 | 0.00132    | 27.11171                  | 0.512                        |         |
|                            | 0.00281         | 42.78619                 | 0.00132    | 41.64735                  | 0.483                        |         |
| 4-bromobenzotrifluoride    | 0.01125         | 63.57201                 | 0.00132    | 18.31174                  | 0.407                        | 0.377   |
|                            | 0.00843         | 21.69062                 | 0.00132    | 7.7937                    | 0.436                        |         |

|                                   |         |           |         |          |       |       |
|-----------------------------------|---------|-----------|---------|----------|-------|-------|
|                                   | 0.00562 | 22.27199  | 0.00132 | 20.03488 | 0.261 |       |
|                                   | 0.00281 | 40.76057  | 0.00132 | 47.37431 | 0.404 |       |
| 4 <sup>l</sup> -bromoacetophenone | 0.01125 | 258.54169 | 0.00132 | 49.48981 | 0.613 | 0.603 |
|                                   | 0.00843 | 194.25781 | 0.00132 | 50.27432 | 0.605 |       |
|                                   | 0.00562 | 127.78354 | 0.00132 | 49.64022 | 0.605 |       |
|                                   | 0.00281 | 62.00702  | 0.00132 | 49.46333 | 0.589 |       |
| ethyl 3-bromobenzoate             | 0.01125 | 309.31046 | 0.00132 | 49.48981 | 0.613 | 0.648 |
|                                   | 0.00843 | 203.75116 | 0.00132 | 50.27432 | 0.605 |       |
|                                   | 0.00562 | 134.89    | 0.00132 | 49.64022 | 0.605 |       |
|                                   | 0.00281 | 61.72871  | 0.00132 | 49.46333 | 0.589 |       |

**Chart S13: Ligand 6: Log(k<sub>rel</sub>) versus  $\sigma(\bullet)$**

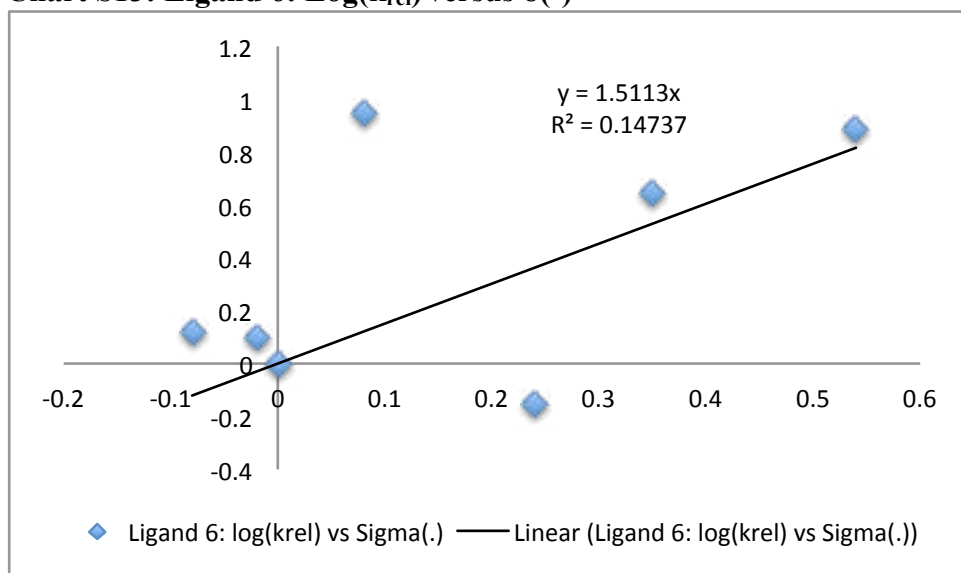

**Chart S14: Ligand 7: Log(k<sub>rel</sub>) versus  $\sigma(\bullet)$**

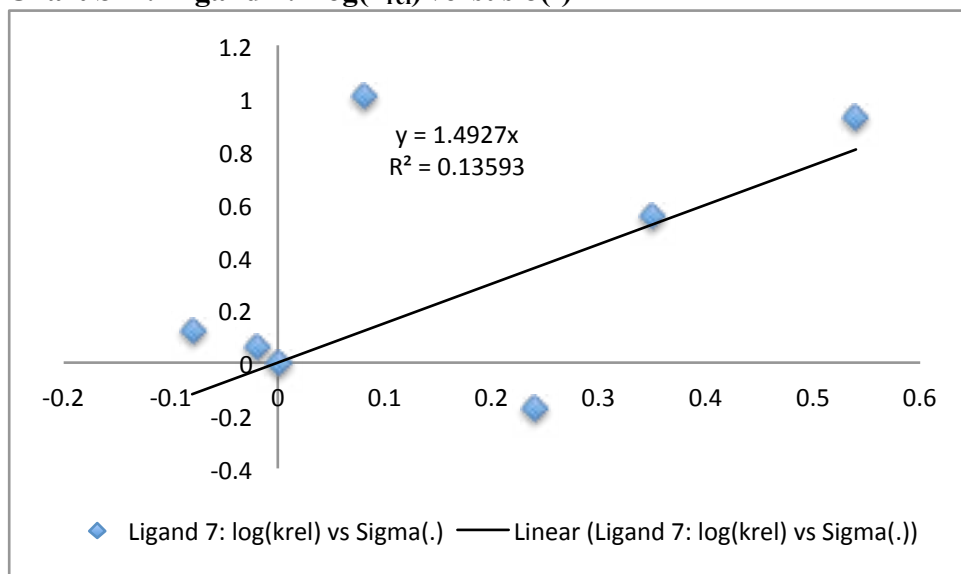

As mentioned in the main text the plot of  $k_{rel}$  versus  $\sigma(\bullet)$  was not linear.

## 6. Substrates, catalyst, and reducing agent effect on rate

### Reaction set-up and data collection using un-activated zinc

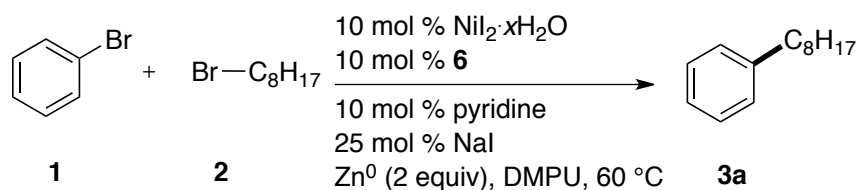

### Standard reaction with un-activated zinc

A 10 mL Schlenk flask was charged with bromobenzene (**1**) (112  $\mu\text{L}$ , 1.00 mmol), 1-bromooctane (**2**) (172  $\mu\text{L}$ , 1.00 mmol),  $\text{NiI}_2 \cdot x\text{H}_2\text{O}$  (40.2 mg, 0.108 mmol), 4,4'-dimethoxy-2,2'-bipyridine (**6**) (21.6 mg, 0.10 mmol), pyridine (4  $\mu\text{L}$ , 0.10 mmol), sodium iodide (38 mg, 0.25 mmol), zinc dust (>10  $\mu\text{m}$ , 130 mg, 2.00 mmol), DMPU (4.0 mL) and dodecane (10  $\mu\text{L}$ , 0.044 mmol as internal standard). The vessel was capped with a septum and the headspace was flushed with Ar gas for 10 seconds. The reaction was heated at 60 °C under positive Ar gas pressure, and the reaction progress were followed by GC analysis. At appropriate times 50  $\mu\text{L}$  aliquots of reaction mixture were removed with a 100  $\mu\text{L}$  gas-tight syringe and quenched with 50  $\mu\text{L}$  of 1 M aqueous  $\text{NaHSO}_4$ , diluted with ethyl ether (1 mL), and filtered through a short silica pad (1.5 cm) in a pipette packed with glass wool. The filtrate was analyzed by gas chromatography. Formation of **3a** was followed with time and plotted using equation (3).

$$-\ln(1-f) = mt \quad (3)$$

Where  $f$  is the fraction of product formed as a function of time and  $t$  is time (min).

Chart S15: Standard reaction with un-activated zinc

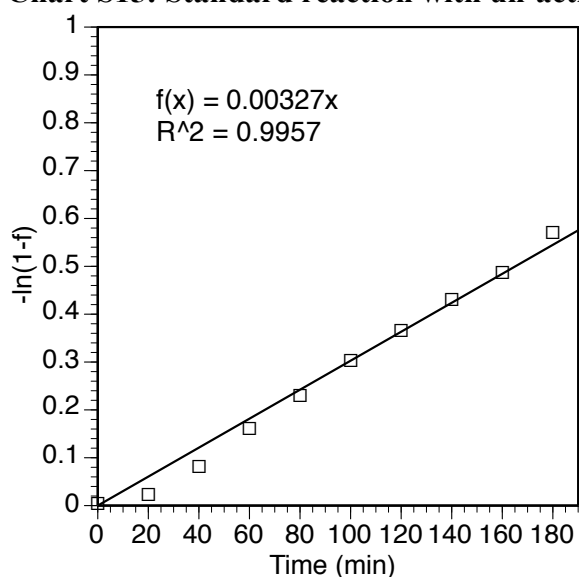

### Effect of doubling the amount of bromobenzene (1) with un-activated zinc

The general procedure for the standard reaction was followed except with excess bromobenzene (1a) (224  $\mu\text{L}$ , 2.00 mmol).

Chart S16: Effect of doubling the amount of bromobenzene (1) with un-activated zinc

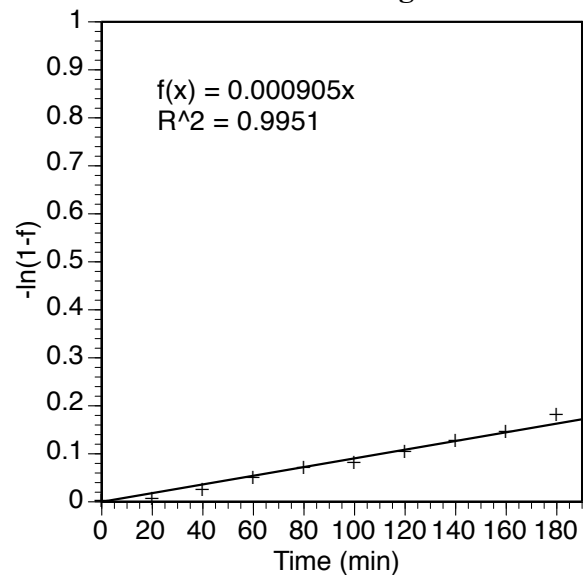

### Effect of doubling the amount of 1-bromooctane (2) with un-activated zinc

The general procedure for the standard reaction was followed except with excess 1-bromooctane (2) (344  $\mu\text{L}$ , 2.00 mmol).

Chart S17: Effect of doubling the amount of 1-bromooctane (2) with un-activated zinc

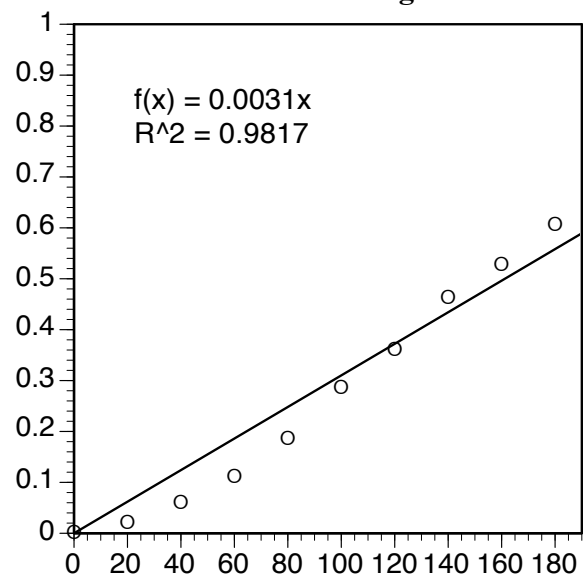

### Effect of doubling the amount of 6/Ni/pyridine with un-activated zinc

The general procedure for the standard reaction was followed except with 20 mol% catalyst loading using  $\text{NiI}_2 \cdot x\text{H}_2\text{O}$  (80.4 mg, 0.216 mmol), 4,4'-dimethoxy-2, 2'-bipyridine (**6**) (43.2 mg, 0.20 mmol), pyridine (8  $\mu\text{L}$ , 0.10 mmol).

Chart S18: Effect of doubling the amount of 6/Ni/pyridine with un-activated zinc

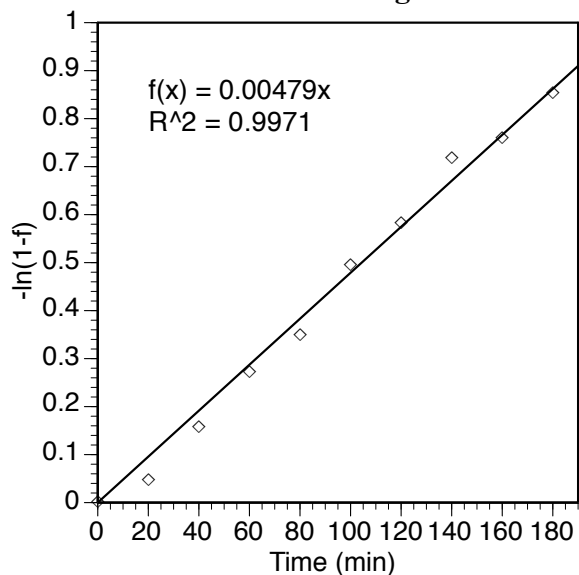

### Effect of doubling the amount of un-activated zinc

The general procedure for the standard reaction was followed except with 4 equiv Zn dust (>10  $\mu\text{m}$ , 260 mg, 4.00 mmol)

Chart S19: Effect of doubling the amount of un-activated zinc

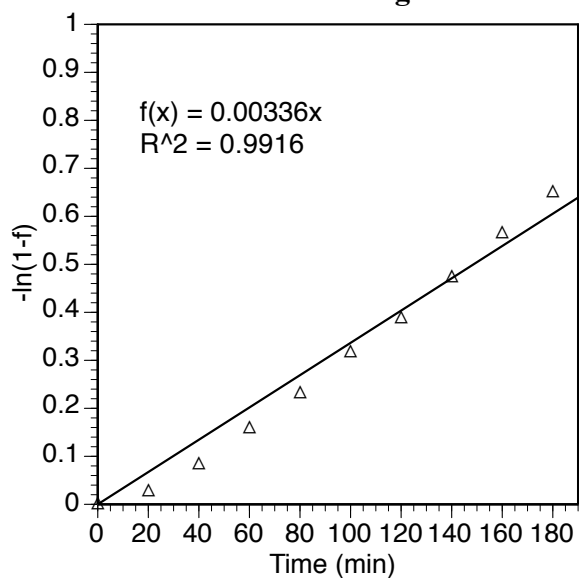

## Reaction set-up and data collection using activated zinc

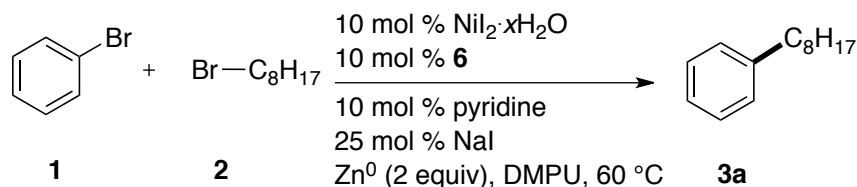

## Standard reaction with activated zinc

The general procedure was followed with bromobenzene (**1**) (56  $\mu\text{L}$ , 0.50 mmol), 1-bromooctane (**2**) (86  $\mu\text{L}$ , 0.50 mmol),  $\text{NiI}_2 \cdot x\text{H}_2\text{O}$  (20.1 mg, 0.054 mmol), 4,4'-dimethoxy-2, 2'-bipyridine (**6**) (10.8 mg, 0.05 mmol), pyridine (2  $\mu\text{L}$ , 0.05 mmol), sodium iodide (19 mg, 0.125 mmol), zinc dust (>10  $\mu\text{m}$ , 65 mg, 1.00 mmol), DMPU (2.0 mL) and dodecane (10  $\mu\text{L}$ , 0.044 mmol as internal standard). Chlorotrimethylsilane and 1,2-dibromoethane (6 mL each) were sequentially added as the last two reagents. The reaction was heated at 60 °C, and the reaction progress were followed by GC analysis. At appropriate times 25  $\mu\text{L}$  aliquots of reaction mixture were removed with a 100  $\mu\text{L}$  gas-tight syringe and quenched with 25  $\mu\text{L}$  of 1 M aqueous  $\text{NaHSO}_4$ , diluted with ethyl ether (1 mL), and filtered through a short silica pad (1.5 cm) in a pipette packed with glass wool. The filtrate was analyzed by gas chromatography. Formation of **3a** was followed with time and plotted using equation (3).

Chart S20: Standard reaction with activated zinc

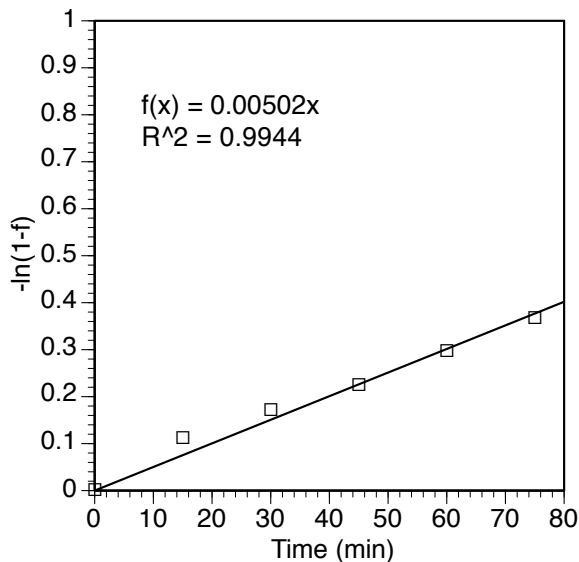

## Effect of doubling the amount of bromobenzene (1) with activated zinc

The general procedure for the standard reaction was followed except with excess bromobenzene (**1a**) (112  $\mu\text{L}$ , 1.00 mmol).



**Chart S21: Effect of doubling the amount of bromobenzene (1) with activated zinc**

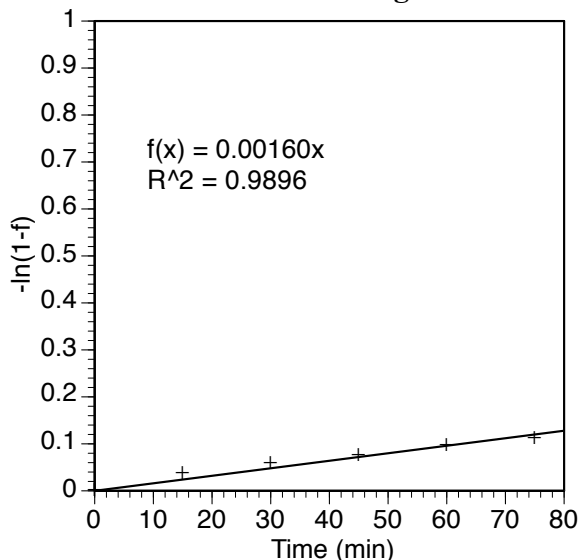

**Effect of doubling the amount of 1-bromooctane (2) with activated zinc**

The general procedure for the standard reaction was followed except with excess 1-bromooctane (2) (172  $\mu\text{L}$ , 1.00 mmol).

**Chart S22: Effect of doubling the amount of 1-bromooctane (2) with activated zinc**

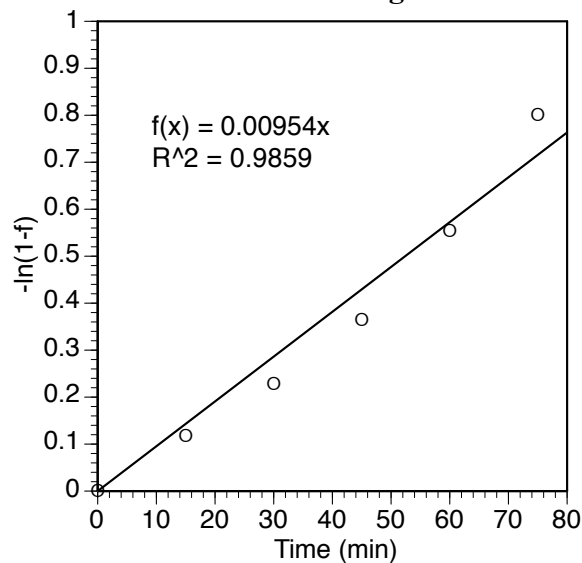

**Effect of doubling the amount of 6/Ni/pyridine with activated zinc**

The general procedure for the standard reaction was followed except with 20 mol% catalyst loading using  $\text{NiI}_2 \cdot x\text{H}_2\text{O}$  (40.2 mg, 0.108 mmol), 4,4'-dimethoxy-2, 2'-bipyridine (6) (21.6 mg, 0.10 mmol), pyridine (4  $\mu\text{L}$ , 0.10 mmol).

**Chart S23: Effect of doubling the amount of 6/Ni/pyridine with activated zinc**

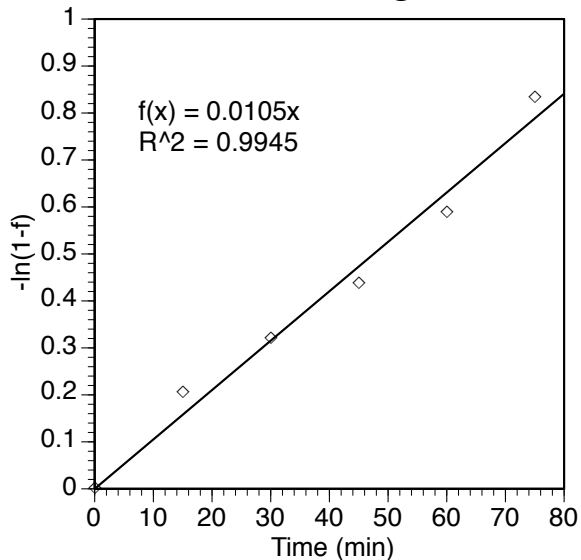

**Effect of doubling the amount of activated zinc**

The general procedure for the standard reaction was followed except with 4 equiv Zn dust (>10  $\mu\text{m}$ , 130 mg, 2.00 mmol).

**Chart S24: Effect of doubling the amount of activated zinc**

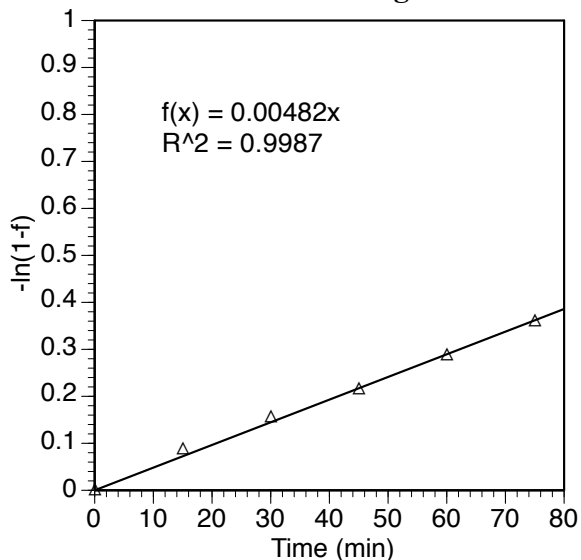

**Effect of spiking 1 equiv benzene into the standard reaction with activated zinc**

The general procedure was followed for the standard reaction except with the addition of benzene (1 equiv 42  $\mu\text{L}$ ).

Chart S25: Effect of spiking 1 equiv benzene into the standard reaction with activated zinc

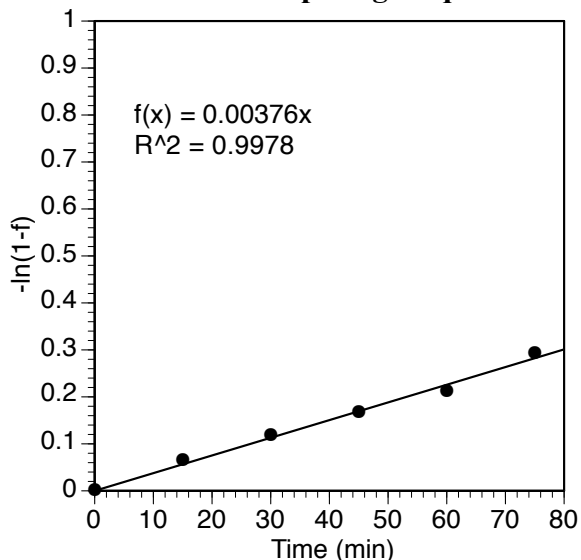

## 7. Procedures and Compound Characterization

### Compounds in Scheme 2: Aryl and alkyl bromides

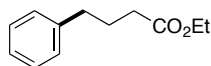

**ethyl 4-phenylbutanoate (3b)** [CAS:10031-93-3].<sup>17</sup> The general procedure was followed with bromobenzene (80  $\mu$ L, 0.75 mmol, 1.00 equiv) and ethyl 4-bromobutanoate (107  $\mu$ L, 0.75 mmol, 1.00 equiv) at 60  $^{\circ}$ C for 14-41 h. The product was isolated by chromatography (95:5 hexanes: ether) as pale yellow oil. With 4,4'-dimethoxy-2, 2'-bipyridine: first run 124 mg (86%, 11 mol% catalyst, 21 h). Second run 109 mg (76%, 5 mol% catalyst, 41 h). Third run 124 mg (86%, 7 mol% catalyst, 24 h). With 1,10-phenanthroline: 104 mg (72%, 11 mol% catalyst, 14.5 h).

$^1$ H-NMR (500 MHz;  $\text{CDCl}_3$ ):  $\delta$  7.37-7.24 (m, 5H), 4.20 (q,  $J = 7.1$  Hz, 2H), 2.72 (t,  $J = 7.6$  Hz, 2H), 2.39 (t,  $J = 7.5$  Hz, 2H), 2.03 (quintet,  $J = 7.5$  Hz, 2H), 1.32 (t,  $J = 7.1$  Hz, 3H).

$^{13}$ C-NMR (126 MHz;  $\text{CDCl}_3$ ):  $\delta$  173.5, 141.5, 128.57, 128.45, 126.0, 60.3, 35.2, 33.8, 26.6, 14.3.

GC-MS  $m/z$  (% relative intensity, ion): 192.05 (21.91,  $\text{M}^+$ ), 147.05 (57.00,  $\text{M}^+ - \text{C}_2\text{H}_5\text{O}$ ), 105.00 (24.23,  $\text{M}^+ - \text{C}_4\text{H}_7\text{O}_2$ ), 91.00 (100.00,  $\text{M}^+ - \text{C}_7\text{H}_7$ ).

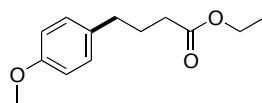

<sup>17</sup> Kurono, Nobuhito.; Sugita, K.; Takasugi, S.; Tokuda, M. *Tetrahedron*, **1999**, *55*, 6097.

**ethyl 4-(4-methoxyphenyl)butanoate (3c)** [CAS:4586-89-4].<sup>18</sup> The general procedure was followed with 4-bromoanisole (94  $\mu$ L, 0.75 mmol, 1.00 equiv) and ethyl 4-bromobutanoate (107  $\mu$ L, 0.75 mmol, 1.00 equiv) at 60 °C for 13-21 h. The product was isolated by chromatography (9:1 pentane: ether) as pale yellow oil. With 4,4'-dimethoxy-2, 2'-bipyridine: first run 121 mg (73%, 11 mol% catalyst, 13 h). Second run 121 mg (73%, 7 mol% catalyst, 19 h). Third run 117 mg (70%, 5 mol% catalyst, 21 h). With 1,10-phenanthroline: 102 mg (61%, 11 mol% catalyst, 15 h), isolated by chromatography (95:5 pentane: ether).

<sup>1</sup>H-NMR (500 MHz; CDCl<sub>3</sub>):  $\delta$  7.09 (d,  $J$  = 8.5 Hz, 2H), 6.83 (d,  $J$  = 8.5 Hz, 2H), 4.12 (q,  $J$  = 7.1 Hz, 2H), 3.79 (s, 3H), 2.59 (t,  $J$  = 7.6 Hz, 2H), 2.30 (t,  $J$  = 7.5 Hz, 2H), 1.92 (quintet,  $J$  = 7.5 Hz, 2H), 1.25 (t,  $J$  = 7.1 Hz, 3H).

<sup>13</sup>C-NMR (126 MHz; CDCl<sub>3</sub>):  $\delta$  173.7, 158.0, 133.6, 129.5, 113.9, 60.4, 55.4, 34.4, 33.8, 26.9, 14.4.

GC-MS  $m/z$  (% relative intensity, ion): 222.05 (25.27, M<sup>+</sup>), 177.05 (17.70, M<sup>+</sup>-C<sub>2</sub>H<sub>5</sub>O), 134.05 (100.00, M<sup>+</sup>-C<sub>4</sub>H<sub>8</sub>O<sub>2</sub>), 121.00 (77.81, M<sup>+</sup>-C<sub>8</sub>H<sub>9</sub>O).

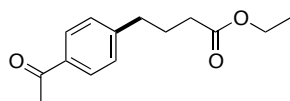

**ethyl 4-(4-acetylphenyl)butanoate (3d)** [CAS:71665-59-3].<sup>19</sup> The general procedure was followed with 4-bromoacetophenone (149 mg, 0.75 mmol, 1.00 equiv) and ethyl 4-bromobutanoate (107  $\mu$ L, 0.75 mmol, 1.00 equiv) at 60 °C for 12-25 h. The product was isolated by chromatography (8:2 pentane: ether) as colorless oil. With 4,4'-dimethoxy-2, 2'-bipyridine: first run 123 mg (70%, 11 mol% catalyst, 21 h). With 1,10-phenanthroline: first run 148 mg (84%, 11 mol% catalyst, 25 h), isolated by chromatography (85:15 pentane: ether). Second run 143 mg (81%, 11 mol% catalyst, 12 h), isolated by chromatography (7:3 hexanes: ether). Third run 133 mg (76%, 5 mol% catalyst, 19 h), isolated by chromatography (5:1 hexanes: ether). Fourth run 133 mg (76%, 5 mol% catalyst, 19 h), isolated by chromatography (7:3 hexanes: ether).

<sup>1</sup>H-NMR (500 MHz; CDCl<sub>3</sub>):  $\delta$  7.89 (d,  $J$  = 8.1 Hz, 2H), 7.27 (d,  $J$  = 8.2 Hz, 2H), 4.13 (q,  $J$  = 7.1 Hz, 2H), 2.71 (t,  $J$  = 7.6 Hz, 2H), 2.58 (s, 3H), 2.32 (t,  $J$  = 7.4 Hz, 2H), 1.97 (quintet,  $J$  = 7.5 Hz, 2H), 1.25 (t,  $J$  = 7.1 Hz, 3H).

<sup>13</sup>C-NMR (126 MHz; CDCl<sub>3</sub>):  $\delta$  197.9, 173.3, 147.4, 135.4, 128.81, 128.70, 60.5, 35.2, 33.7, 26.7, 26.3, 14.4.

GC-MS  $m/z$  (% relative intensity, ion): 234.05 (36.10, M<sup>+</sup>), 219.00 (10.98, M<sup>+</sup>-CH<sub>3</sub>), 147.05 (100.00, M<sup>+</sup>-C<sub>4</sub>H<sub>7</sub>O<sub>2</sub>), 131.05 (38.08, M<sup>+</sup>-C<sub>5</sub>H<sub>11</sub>O<sub>2</sub>), 90.00 (26.55, M<sup>+</sup>-C<sub>7</sub>H<sub>12</sub>O<sub>3</sub>).

<sup>18</sup> Cahiez, G.; Foulgoc, L.; Moyeux, A. *Angew. Chem., Int. Ed.*, **2009**, *48*, 2969-2972.

<sup>19</sup> Sase, S.; Jaric, M.; Metzger, A.; Malakhov, V.; Knochel, P. *J. Org. Chem.*, **2008**, *73*, 7380-7382.

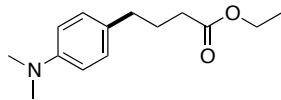

**ethyl 4-(4-(dimethylamino)phenyl)butanoate (3e).** The general procedure was followed with 4-bromo-N,N-dimethylaniline (150 mg, 0.75 mmol, 1.00 equiv) and ethyl 4-bromobutanoate (107  $\mu$ L, 0.75 mmol, 1.00 equiv) at 60 °C for 16-23 h. The product was isolated by chromatography (95:5 hexanes: ether) as pale yellow oil. With 4,4'-dimethoxy-2, 2'-bipyridine: first run 122 mg (69%, 5 mol% catalyst, 23 h). Second run 131 mg (74%, 5 mol% catalyst, 19 h).

$^1\text{H-NMR}$  (400 MHz;  $\text{CDCl}_3$ ):  $\delta$  7.08 (d,  $J = 8.5$  Hz, 2H), 6.72 (d,  $J = 8.6$  Hz, 2H), 4.14 (q,  $J = 7.1$  Hz, 2H), 2.93 (s, 6H), 2.59 (t,  $J = 7.5$  Hz, 2H), 2.33 (t,  $J = 7.4$  Hz, 2H), 1.95 (dt,  $J = 9.4, 5.5$  Hz, 2H), 1.27 (t,  $J = 7.1$  Hz, 3H).

$^{13}\text{C-NMR}$  (126 MHz;  $\text{CDCl}_3$ ):  $\delta$  173.8, 149.3, 129.7, 129.2, 113.1, 60.3, 41.0, 34.2, 33.9, 27.0, 14.4.

GC-MS  $m/z$  (% relative intensity, ion): 235.10 (25.35,  $\text{M}^+$ ), 190.05 (6.72,  $\text{M}^+ - \text{C}_2\text{H}_5\text{O}$ ), 134.10 (100.00,  $\text{M}^+ - \text{C}_5\text{H}_9\text{O}_2$ ).

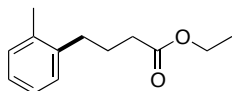

**ethyl 4-(*o*-tolyl)butanoate (3f) [CAS:105986-51-4].**<sup>20</sup> The general procedure was followed with 2-bromotoluene (90  $\mu$ L, 0.75 mmol, 1.00 equiv) and ethyl 4-bromobutanoate (107  $\mu$ L, 0.75 mmol, 1.00 equiv) at 60 °C for 23-24 h. The product was isolated by chromatography (pentane) as pale yellow oil. With 4,4'-dimethoxy-2, 2'-bipyridine: first run 137 mg (88%, 11 mol% catalyst, 24 h). Second run 121 mg (78%, 5 mol% catalyst, 19 h), isolated by chromatography (95:5 pentane: ether).

$^1\text{H-NMR}$  (500 MHz;  $\text{CDCl}_3$ ):  $\delta$  7.15-7.10 (m, 5H), 4.14 (q,  $J = 7.1$  Hz, 2H), 2.65 (t,  $J = 7.8$  Hz, 2H), 2.37 (t,  $J = 7.4$  Hz, 3H), 2.32 (s, 3H), 1.92 (dt,  $J = 15.3, 7.6$  Hz, 2H), 1.27 (t,  $J = 7.1$  Hz, 3H).

$^{13}\text{C-NMR}$  (126 MHz;  $\text{CDCl}_3$ ):  $\delta$  173.6, 139.8, 136.1, 130.4, 129.1, 126.23, 126.06, 60.4, 34.1, 32.7, 25.5, 19.4, 14.4.

GC-MS  $m/z$  (% relative intensity, ion): 206.15 (11.02,  $\text{M}^+$ ), 161.10 (18.29,  $\text{M}^+ - \text{C}_2\text{H}_5\text{O}$ ), 88.10 (25.46,  $\text{M}^+ - \text{C}_9\text{H}_{11}$ ), 118.10 (46.98,  $\text{M}^+ - \text{C}_4\text{H}_7\text{O}_2$ ), 105.05 (100.00,  $\text{M}^+ - \text{C}_5\text{H}_9\text{O}_2$ ).

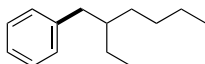

**(2-ethylhexyl)benzene (3g) [CAS:5617-39-0].**<sup>21</sup> The general procedure was followed with bromobenzene (80  $\mu$ L, 0.75 mmol, 1.00 equiv) and 2-ethylhexyl bromide (133  $\mu$ L, 0.75 mmol,

<sup>20</sup> Tamaru, Y.; Ochiai, H.; Nakamura, T.; Yoshida, Z. *Tetrahedron Lett.*, **1986**, 27, 955-958.

<sup>21</sup> (a) Fessard, T. C.; Motoyoshi, H.; Carreira, E. M. *Angew. Chem., Int. Ed.* **2007**, 46, 2078; (b) Toussaint, H. *J. Am. Chem. Soc.* **1940**, 62, 1145.

1.00 equiv) at 60 °C for 23-38 h. The product was isolated by chromatography (pentane) as colorless oil. With 4,4'-dimethoxy-2, 2'-bipyridine: first run 94 mg (66%, 5 mol% catalyst, 38 h). Second run 86 mg (60%, 11 mol% catalyst, 23 h).

<sup>1</sup>H-NMR (500 MHz; CDCl<sub>3</sub>): δ 7.34-7.20 (m, 5H), 2.64-2.56 (m, 2H), 1.64 (m, 1H), 1.35 (m, 8H), 0.94 (m, 6H).

<sup>13</sup>C-NMR (126 MHz; CDCl<sub>3</sub>): δ 141.9, 129.2, 128.1, 125.5, 41.2, 40.2, 32.4, 28.9, 25.5, 23.1, 14.2, 10.8.

GC-MS *m/z* (% relative intensity, ion): 190.10 (22.83, M<sup>+</sup>), 98.10 (16.38, M<sup>+</sup>-C<sub>7</sub>H<sub>8</sub>), 92.05 (100.00, M<sup>+</sup>-C<sub>7</sub>H<sub>6</sub>), 91.00 (89.47, M<sup>+</sup>-C<sub>7</sub>H<sub>7</sub>), 57.05 (M<sup>+</sup>-C<sub>4</sub>H<sub>9</sub>).

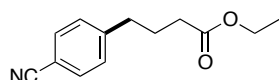

**ethyl 4-(4-cyanophenyl)butanoate (3h) [CAS:131379-33-4].**<sup>22</sup> The general procedure was followed with 4-bromobenzonitrile (137 mg, 0.75 mmol, 1.00 equiv) and ethyl 4-bromobutanoate (107 μL, 0.75 mmol, 1.00 equiv) at 60 °C for 18-19 h. The product was isolated by chromatography (8:2 pentane: ether) as colorless oil. With 1,10-phenanthroline: first run 113 mg (69%, 5 mol% catalyst, 18 h). Second run 107 mg (66%, 5 mol% catalyst, 18 h).

<sup>1</sup>H-NMR (500 MHz; CDCl<sub>3</sub>): δ 7.58 (d, *J* = 8.1 Hz, 2H), 7.29 (d, *J* = 8.0 Hz, 2H), 4.13 (q, *J* = 7.1 Hz, 2H), 2.71 (t, *J* = 7.7 Hz, 2H), 2.32 (t, *J* = 7.3 Hz, 2H), 1.96 (quintet, *J* = 7.6 Hz, 2H), 1.25 (t, *J* = 7.1 Hz, 3H).

<sup>13</sup>C-NMR (126 MHz; CDCl<sub>3</sub>): δ 173.2, 147.2, 132.4, 129.4, 119.1, 110.1, 60.6, 35.3, 33.5, 26.1, 14.4.

GC-MS *m/z* (% relative intensity, ion): 217.00 (14.63, M<sup>+</sup>), 172.05 (34.76, M<sup>+</sup>-C<sub>3</sub>H<sub>5</sub>O), 130.05 (60.09, M<sup>+</sup>-C<sub>4</sub>H<sub>7</sub>O<sub>2</sub>), 116.00 (100.00, M<sup>+</sup>-C<sub>5</sub>H<sub>9</sub>O<sub>2</sub>).

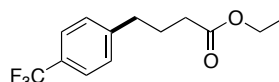

**ethyl 4-(4-(trifluoromethyl)phenyl)butanoate (3i) [CAS:1235271-20-1].**<sup>22</sup> The general procedure was followed with 4-bromobenzotrifluoride (104 μL, 0.75 mmol, 1.00 equiv) and ethyl 4-bromobutanoate (107 μL, 0.75 mmol, 1.00 equiv) at 60 °C for 19-20 h. The product was isolated by chromatography (95:5 pentane: ether) as yellow oil. With 4,4'-dimethoxy-2, 2'-bipyridine: first run 120 mg (61%, 5 mol% catalyst, 20 h). With 1,10-phenanthroline: first run 135 mg (69%, 5 mol% catalyst, 20 h). Second run 144 mg (74%, 5 mol% catalyst, 19 h).

<sup>1</sup>H-NMR (500 MHz; CDCl<sub>3</sub>): δ 7.51 (d, *J* = 7.9 Hz, 2H), 7.27 (d, *J* = 7.9 Hz, 2H), 4.11 (q, *J* = 7.1 Hz, 2H), 2.69 (t, *J* = 7.6 Hz, 2H), 2.30 (t, *J* = 7.4 Hz, 2H), 1.95 (quintet, *J* = 7.5 Hz, 2H), 1.23 (t, *J* = 7.1 Hz, 3H).

<sup>22</sup> Amatore, M.; Gosmini, C. *Chem.-Eur. J.*, **2010**, *16*, 5848-5852.

$^{13}\text{C}$ -NMR (126 MHz;  $\text{CDCl}_3$ ):  $\delta$  173.3, 145.7, 128.9, 128.5 (q,  $J$  = 33.4 Hz), 125.4 (q,  $J$  = 3.8 Hz), 124.5 (q,  $J$  = 271.8 Hz), 60.5, 35.0, 33.6, 26.3, 14.3.

$^{19}\text{F}$ -NMR (376 MHz;  $\text{CDCl}_3$ ):  $\delta$  0.5.

GC-MS  $m/z$  (% relative intensity, ion): 215.00 (23.28,  $\text{M}^+$ - $\text{C}_2\text{H}_5\text{O}$ ), 172.00 (22.10,  $\text{M}^+$ - $\text{C}_4\text{H}_8\text{O}_2$ ), 159.00 (72.48,  $\text{M}^+$ - $\text{C}_5\text{H}_9\text{O}_2$ ), 88.00 (100.00,  $\text{M}^+$ - $\text{C}_{318}\text{F}_3$ ), 70.00 (29.55,  $\text{M}^+$ - $\text{C}_{12}\text{H}_{15}\text{O}_2$ ).

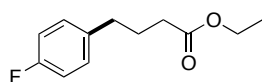

**ethyl 4-(4-fluorophenyl)butanoate (3j)** [CAS:1693-05-6].<sup>23</sup> The general procedure was followed with 1-bromo-4-fluorobenzene (82  $\mu\text{L}$ , 0.75 mmol, 1.00 equiv) and ethyl 4-bromobutanoate (107  $\mu\text{L}$ , 0.75 mmol, 1.00 equiv) at 60  $^\circ\text{C}$  for 16-20 h. The product was isolated by chromatography (95:5 pentane: ether) as pale yellow oil. With 4,4'-dimethoxy-2, 2'-bipyridine: first run 114 mg (72%, 5 mol% catalyst, 20 h). With 1,10-phenanthroline: first run 124 mg (79%, 5 mol% catalyst, 19 h). Second run 123 mg (78%, 5 mol% catalyst, 16 h).

$^1\text{H}$ -NMR (500 MHz;  $\text{CDCl}_3$ ):  $\delta$  7.13 (td,  $J$  = 6.0, 2.4 Hz, 2H), 6.96 (t,  $J$  = 8.7 Hz, 2H), 4.12 (q,  $J$  = 7.1 Hz, 2H), 2.62 (t,  $J$  = 7.6 Hz, 2H), 2.30 (t,  $J$  = 7.4 Hz, 2H), 1.93 (quintet,  $J$  = 7.5 Hz, 2H), 1.25 (t,  $J$  = 7.1 Hz, 3H).

$^{13}\text{C}$ -NMR (126 MHz;  $\text{CDCl}_3$ ):  $\delta$  173.5, 161.4 (d,  $J$  = 243.1 Hz), 137.1 (d,  $J$  = 2.6 Hz), 129.9 (d,  $J$  = 7.9 Hz), 115.2 (d,  $J$  = 21.4 Hz), 60.4, 34.4, 33.6, 26.7, 14.3.

$^{19}\text{F}$ -NMR (376 MHz;  $\text{C}_6\text{D}_6$ ):  $\delta$  -118.0.

GC-MS  $m/z$  (% relative intensity, ion): 210.05 (18.12,  $\text{M}^+$ ), 165.05 (46.57,  $\text{M}^+$ - $\text{C}_2\text{H}_5\text{O}$ ), 122.00 (60.77,  $\text{M}^+$ - $\text{C}_4\text{H}_8\text{O}_2$ ), 109.00 (100.00,  $\text{M}^+$ - $\text{C}_5\text{H}_9\text{O}_2$ ).

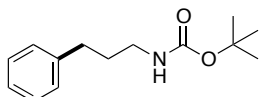

**tert-butyl (3-phenylpropyl)carbamate (3k)** [CAS:147410-39-7].<sup>24</sup> The general procedure was followed with bromobenzene (80  $\mu\text{L}$ , 0.75 mmol, 1.00 equiv) and *tert*-butyl (3-bromopropyl)carbamate (179 mg, 0.75 mmol, 1.00 equiv) at 60  $^\circ\text{C}$  for 13-17 h. The product was isolated by chromatography (9:1 hexanes: ether) as pale yellow oil. With 4,4'-dimethoxy-2, 2'-bipyridine: first run 140 mg (79%, 5 mol% catalyst, 20 h). Second run 138 mg (78%, 5 mol% catalyst, 17 h).

$^1\text{H}$ -NMR (500 MHz;  $\text{CDCl}_3$ ):  $\delta$  7.31-7.19 (m, 5H), 4.54 (s, 1H), 3.18 (d,  $J$  = 6.0 Hz, 2H), 2.66 (t,  $J$  = 7.8 Hz, 2H), 1.83 (quintet,  $J$  = 7.4 Hz, 2H), 1.47 (s, 3i).

$^{13}\text{C}$ -NMR (126 MHz;  $\text{CDCl}_3$ ):  $\delta$  156.1, 141.7, 128.52, 128.47, 126.0, 79.2, 40.4, 33.3, 31.9, 28.5.

<sup>23</sup> Kitazawa, N.; Ueno, K.; Takahashi, K.; Kimura, T.; Sasaki, A.; Kawano, K.; Okabe, T.; Komatsu, M.; Matsunaga, M.; Kubota, A.; Eisai Co., Ltd. Indoles. US2002/19531, May 18, 2001.

<sup>24</sup> Maddani, Mahagundappa R.; Moorthy, Saravana K.; Prabhu, Kandikere R. *Tetrahedron*, **2010**, *66*, 329-333.

GC-MS  $m/z$  (% relative intensity, ion): 179.05 (28.56,  $M^+$ -C<sub>4</sub>H<sub>9</sub>), 118.05 (100.00,  $M^+$ -C<sub>5</sub>H<sub>11</sub>NO<sub>2</sub>), 91.00 (36.09,  $M^+$ -C<sub>7</sub>H<sub>14</sub>NO<sub>2</sub>).

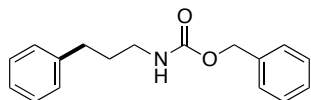

**benzyl (3-phenylpropyl)carbamate (31)** [CAS:302569-84-2].<sup>25</sup> The general procedure was followed with bromobenzene (80  $\mu$ L, 0.75 mmol, 1.00 equiv) and benzyl (3-bromopropyl)carbamate (204 mg, 0.75 mmol, 1.00 equiv) at 60 °C for 5-17 h. The product was isolated by chromatography (75:25 hexanes: ether) as pale yellow oil. With 4,4'-dimethoxy-2, 2'-bipyridine: first run 121 mg (60%, 5 mol% catalyst, 17 h). Second run 141 mg (70%, 11 mol% catalyst, 5 h).

<sup>1</sup>H-NMR (500 MHz; CDCl<sub>3</sub>):  $\delta$  7.39-7.20 (m, 10H), 5.14 (s, 2H), 4.99 (s, 1H), 3.25 (d,  $J$  = 6.3 Hz, 2H), 2.67 (t,  $J$  = 7.4 Hz, 2H), 1.86 (t,  $J$  = 7.1 Hz, 2H).

<sup>13</sup>C-NMR (126 MHz; CDCl<sub>3</sub>):  $\delta$  176.5, 156.5, 141.4, 136.7, 128.52, 128.45, 128.37, 128.1, 126.0, 66.6, 40.7, 33.0, 31.6.

GC-MS  $m/z$  (% relative intensity, ion): 178.10 (36.72,  $M^+$ -C<sub>7</sub>H<sub>7</sub>), 117.05 (25.22,  $M^+$ -C<sub>12</sub>H<sub>10</sub>), 91.00 (100.00,  $M^+$ -C<sub>10</sub>H<sub>12</sub>NO<sub>2</sub>), 77.00 (11.62,  $M^+$ -C<sub>5</sub>H<sub>9</sub>NO<sub>2</sub>).

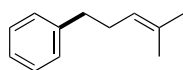

**(4-methylpent-3-en-1-yl)benzene (3m)** [CAS:33501-90-5].<sup>26</sup> The general procedure was followed with bromobenzene (80  $\mu$ L, 0.75 mmol, 1.00 equiv) and 5-bromo-2-methyl-2-pentene (100  $\mu$ L, 0.75 mmol, 1.00 equiv, filtered through a short silica pad (1.5 cm) in a pipette packed with glass wool prior to use to remove yellow coloration) at 60 °C for 20-25 h. The product was isolated by chromatography (hexanes) as pale yellow oil. With 4,4'-dimethoxy-2, 2'-bipyridine: first run 60 mg (50%, 5 mol% catalyst, 20 h), further purified by preparative TLC (hexanes). Second run 68 mg (56%, 5 mol% catalyst, 25 h).

<sup>1</sup>H-NMR (500 MHz; CDCl<sub>3</sub>):  $\delta$  7.32-7.19 (m, 5H), 5.21 (ddd,  $J$  = 7.0, 5.8, 1.2 Hz, 1H), 2.67 (t,  $J$  = 7.8 Hz, 2H), 2.33 (q,  $J$  = 7.5 Hz, 2H), 1.72 (s, 3H), 1.60 (s, 3H).

<sup>13</sup>C-NMR (126 MHz; CDCl<sub>3</sub>):  $\delta$  142.6, 132.2, 128.6, 128.4, 125.8, 123.9, 36.3, 30.2, 25.8, 17.8.

GC-MS  $m/z$  (% relative intensity, ion): 160.10 (48.52,  $M^+$ ), 104.00 (11.23,  $M^+$ -C<sub>4</sub>H<sub>7</sub>), 91.00 (73.07,  $M^+$ -C<sub>5</sub>H<sub>9</sub>), 69.05 (100.00,  $M^+$ -C<sub>7</sub>H<sub>7</sub>).

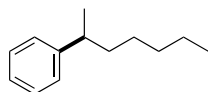

<sup>25</sup> Yang, B.-L.; Tian, S.-K. *Eur. J. Org. Chem.* **2007**, 28, 4646.

<sup>26</sup> Charette, A. B.; Molinaro, C.; Brochu, C. *J. Am. Chem. Soc.* **2001**, 123, 12160.



**heptan-2-ylbenzene (3n)** [CAS:2132-84-5].<sup>27</sup> The general procedure was followed with bromobenzene (80  $\mu$ L, 0.75 mmol, 1.00 equiv) and 2-bromoheptane (148  $\mu$ L, 0.94 mmol, 1.25 equiv, technical grade, 89:11 2-bromoheptane:3-bromoheptane) at 60 °C for 17-23 h. The product was isolated by chromatography (pentane) as a 6.3:1 mixture of **3n**:heptan-3-ylbenzene as colorless oil. With 4,4'-dimethoxy-2, 2'-bipyridine: first run 75 mg (57% isolated as a 87:13 ratio of **3n**:heptan-3-ylbenzene, 5 mol% catalyst, 23 h). Second run with 2-bromoheptane (177  $\mu$ L, 1.125 mmol, 1.50 equiv) 81 mg (61% isolated as a 79:21 ratio of **3n**:heptan-3-ylbenzene, 5 mol% catalyst, 25 h).

<sup>1</sup>H-NMR (400 MHz; CDCl<sub>3</sub>):  $\delta$  7.31-7.17 (m, 5H), 2.67 (sextet,  $J = 7.1$  Hz, 1H), 1.59-1.52 (m, 2H), 1.25 (m, 3i), 0.85 (t,  $J = 6.8$  Hz, 3H).

<sup>13</sup>C-NMR (126 MHz; CDCl<sub>3</sub>):  $\delta$  148.1, 128.4, 127.1, 125.9, 40.1, 38.6, 32.1, 27.5, 22.7, 22.5, 14.2.

GC-MS  $m/z$  (% relative intensity, ion): 176.10 (15.86, M<sup>+</sup>), 105.05 (100.00, M<sup>+</sup>-C<sub>5</sub>H<sub>11</sub>), 91.05 (19.36, M<sup>+</sup>-C<sub>6</sub>H<sub>14</sub>), 77.05 (12.47, M<sup>+</sup>-C<sub>7</sub>H<sub>15</sub>).

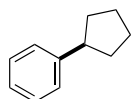

**cyclopentylbenzene (3o)** [CAS:700-88-9].<sup>28</sup> The general procedure was followed with bromobenzene (80  $\mu$ L, 0.75 mmol, 1.00 equiv) and cyclopentyl bromide (101  $\mu$ L, 0.94 mmol, 1.25 equiv) at 60 °C for 17-23 h. The product was isolated by chromatography (pentane) as colorless oil. With 4,4'-dimethoxy-2, 2'-bipyridine: first run 62 mg (56%, 5 mol% catalyst, 23 h). Second run with cyclopentyl bromide (121  $\mu$ L, 1.125 mmol, 1.50 equiv) 69 mg (63%, 5 mol% catalyst, 25 h).

<sup>1</sup>H-NMR (500 MHz; CDCl<sub>3</sub>):  $\delta$  7.31-7.16 (m, 5H), 3.03-2.96 (m, 1H), 2.08-2.06 (m, 2H), 1.83-1.80 (m, 2H), 1.71-1.58 (m, 4H).

<sup>13</sup>C-NMR (126 MHz; CDCl<sub>3</sub>):  $\delta$  146.7, 128.4, 127.2, 125.8, 46.1, 34.8, 25.7.

GC-MS  $m/z$  (% relative intensity, ion): 146.10 (67.78, M<sup>+</sup>), 117.05 (100.00, M<sup>+</sup>-C<sub>2</sub>H<sub>4</sub>), 104.00 (67.78, M<sup>+</sup>-C<sub>3</sub>H<sub>6</sub>), 91.05 (52.29, M<sup>+</sup>-C<sub>4</sub>H<sub>8</sub>), 77.05 (26.40, M<sup>+</sup>-C<sub>5</sub>H<sub>9</sub>).

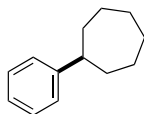

**phenylcycloheptane (3p)** [CAS:4401-18-7].<sup>29</sup> The general procedure was followed with bromobenzene (80  $\mu$ L, 0.75 mmol, 1.00 equiv) and cycloheptyl bromide (129  $\mu$ L, 0.94 mmol, 1.25 equiv) at 60 °C for 17-23 h. The product was isolated by chromatography (pentane) as colorless oil. With 4,4'-dimethoxy-2, 2'-bipyridine: first run 74 mg (57%, 5 mol% catalyst, 23

<sup>27</sup> Hobbs, C.; Hammann, W. *J. Org. Chem.* **1970**, 35 4188-4191.

<sup>28</sup> Clive, D. L. J.; Pham, M. P. *J. Org. Chem.*, **2009**, 74, 1685-1690.

<sup>29</sup> Kawamura, S.; Ishizuka, K.; Takaya, H.; Nakamura, M. *Chem. Commun.*, **2010**, 46, 6054-6056.

h). Second run with cycloheptyl bromide (155  $\mu\text{L}$ , 1.125 mmol, 1.50 equiv) 81 mg (61%, 5 mol% catalyst, 25 h).

$^1\text{H-NMR}$  (400 MHz;  $\text{CDCl}_3$ ):  $\delta$  7.30-7.14 (m, 5H), 2.66 (tt,  $J = 10.4, 3.6$  Hz, 1H), 1.92 (dq,  $J = 10.0, 3.3$  Hz, 2H), 1.82-1.77 (m, 2H), 1.73-1.53 (m, 8H).

$^{13}\text{C-NMR}$  (126 MHz;  $\text{CDCl}_3$ ):  $\delta$  150.2, 128.4, 126.8, 125.6, 47.2, 37.0, 28.1, 27.4.

GC-MS  $m/z$  (% relative intensity, ion): 174.10 (36.12,  $\text{M}^+$ ), 117.10 (56.38,  $\text{M}^+-\text{C}_4\text{H}_8$ ), 104.00 (100.00,  $\text{M}^+-\text{C}_5\text{H}_{10}$ ), 91.00 (71.15,  $\text{M}^+-\text{C}_6\text{H}_{12}$ ), 77.05 (13.31,  $\text{M}^+-\text{C}_7\text{H}_{13}$ ).

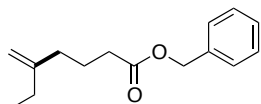

**benzyl 5-methyleneheptanoate (3q).** The general procedure was followed with 2-bromo-1-butene (77  $\mu\text{L}$ , 0.75 mmol, 1.00 equiv) and benzyl 4-bromobutanoate (193 mg, 0.75 mmol, 1.00 equiv) at 60  $^\circ\text{C}$  for 25 h. The product was isolated by chromatography (95:5 hexanes: ether) as a 74:26 mixture of product:benzylbutyrate.<sup>30</sup> These products proved challenging to separate by chromatography and the yield for product was calculated from the NMR ratio with MW data. With 4,4'-dimethoxy-2, 2'-bipyridine: first run 146 mg, which corresponds to a 66% yield of **3q**, 5 mol% catalyst. Characterization data are for **3q** only.

$^1\text{H-NMR}$  (500 MHz;  $\text{CDCl}_3$ ):  $\delta$  7.36-7.31 (m, 5H), 5.12 (s, 2H), 4.73 (s, 1H), 4.69 (s, 1H), 2.36 (t,  $J = 7.6$  Hz, 2H), 2.07-1.98 (m, 4H), 1.79 (quintet,  $J = 7.5$  Hz, 2H), 1.01 (t,  $J = 7.4$  Hz, 3H).

$^{13}\text{C-NMR}$  (126 MHz;  $\text{CDCl}_3$ ):  $\delta$  173.6, 150.4, 136.2, 128.7, 128.3, 108.6, 66.2, 35.6, 33.9, 28.7, 23.1, 12.4.

GC-MS  $m/z$  (% relative intensity, ion): 141.10 (24.32,  $\text{M}^+-\text{C}_7\text{H}_7$ ), 95.05 (20.10,  $\text{M}^+-\text{C}_8\text{H}_7\text{O}_2$ ), 91.00 (100.00,  $\text{M}^+-\text{C}_8\text{H}_{13}\text{O}_2$ ), 55.00 (16.39,  $\text{M}^+-\text{C}_{11}\text{H}_{13}\text{O}_2$ ).

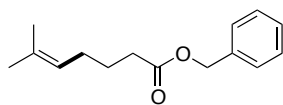

**benzyl 6-methylhept-5-enoate (3r) [CAS:108957-11-5].** The general procedure was followed with 2-bromo-1-propene (67  $\mu\text{L}$ , 0.75 mmol, 1.00 equiv) and benzyl 4-bromobutanoate (193 mg, 0.75 mmol, 1.00 equiv) at 60  $^\circ\text{C}$  for 18-25 h. The product was isolated by chromatography (95:5 hexanes: ether) as yellow oil, which was contaminated with benzyl butyrate.<sup>30</sup> Yields quoted in the text exclude the weight of the contaminant. With 4,4'-dimethoxy-2, 2'-bipyridine: first run 117 mg of a 71:29 ratio of **3r**:benzyl butyrate, which corresponds to a 51% yield of **3r**, (5 mol% catalyst, 25 h). Second run, 112 mg of 82:18 ratio of **3r**:benzyl butyrate, which corresponds to a 55% yield of **3r**, (5 mol% catalyst, 18 h). Characterization data are for **3r** only.

$^1\text{H-NMR}$  (500 MHz;  $\text{CDCl}_3$ ):  $\delta$  7.36 (m, 5H), 5.12-5.08 (m, 3H), 2.35 (tt,  $J = 7.3, 3.8$  Hz, 2H), 2.02 (q,  $J = 7.2$  Hz, 2H), 1.71-1.66 (m, 5H), 1.58 (s, 3H).

<sup>30</sup> Poeylout-Palena, A. A.; Testero, S. A.; Mata, E. G., *Chem. Commun.* **2010**, 46, 6054-6056.

$^{13}\text{C}$ -NMR (126 MHz;  $\text{CDCl}_3$ ):  $\delta$  173.7, 136.3, 132.7, 128.7, 128.32, 128.29, 123.6, 66.2, 33.9, 27.5, 25.8, 25.2, 17.8.

GC-MS  $m/z$  (% relative intensity, ion): 141.10 (79.93,  $\text{M}^+$ - $\text{C}_7\text{H}_7$ ), 99.05 (12.44,  $\text{M}^+$ - $\text{C}_{10}\text{H}_{14}$ ), 91.00 (100.00,  $\text{M}^+$ - $\text{C}_8\text{H}_{13}\text{O}_2$ ), 69.05 (12.87,  $\text{M}^+$ - $\text{C}_{10}\text{H}_{11}\text{O}_2$ ).

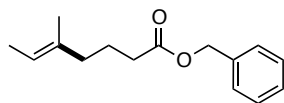

**(E)-benzyl 5-methylhept-5-enoate (3s).** The general procedure was followed with (*E*)-2-bromo-2-butene (76  $\mu\text{L}$ , 0.75 mmol, 1.00 equiv) and benzyl 4-bromobutanoate (198.2 mg, 0.75 mmol, 1.00 equiv) at 60  $^\circ\text{C}$  for 22-26 h. The product was isolated by chromatography (95:5 hexanes:ether) as yellow oil. With 4,4'-dimethoxy-2, 2'-bipyridine: first run 125 mg (72%, 5 mol% catalyst, 26 h) isolated as a 93:7 ratio of **3s**:**3t**. Second run 137 mg (79%, 5 mol% catalyst, 22 h) isolated as a 89:11 ratio of **3s**:**3t**. Reported chemical shifts are for the major isomer (**3s**) only.

$^1\text{H}$ -NMR (500 MHz;  $\text{CDCl}_3$ ):  $\delta$  7.37-7.33 (m, 5H), 5.21 (q,  $J = 6.2$  Hz, 1H), 5.13 (s, 2H), 2.34 (dt,  $J = 12.6, 6.7$  Hz, 2H), 2.02 (t,  $J = 7.3$  Hz, 2H), 1.77 (quintet,  $J = 7.4$  Hz, 2H), 1.59-1.53 (m, 6H).

$^{13}\text{C}$ -NMR (126 MHz;  $\text{CDCl}_3$ ):  $\delta$  173.7, 136.3, 134.7, 128.6, 128.28, 128.25, 119.5, 66.2, 39.0, 33.8, 23.2, 15.5, 13.4.

GC-MS  $m/z$  (% relative intensity, ion): 141.10 (52.43,  $\text{M}^+$ - $\text{C}_7\text{H}_7$ ), 97.05 (2.55,  $\text{M}^+$ - $\text{C}_8\text{H}_7\text{O}_2$ ), 91.00 (100.00,  $\text{M}^+$ - $\text{C}_6\text{H}_{13}\text{O}_2$ ).

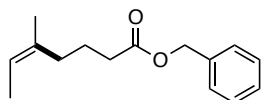

**(Z)-benzyl 5-methylhept-5-enoate (3t).** The general procedure was followed with (*Z*)-2-bromo-2-butene (76  $\mu\text{L}$ , 0.75 mmol, 1.00 equiv, 88:12 ratio of *Z*:*E* isomers by  $^1\text{H}$  NMR analysis) and benzyl 4-bromobutanoate (198.2 mg, 0.75 mmol, 1.00 equiv) at 60  $^\circ\text{C}$  for 20 h. The product was isolated by chromatography (95:5 hexanes:ether) as yellow oil. With 4,4'-dimethoxy-2, 2'-bipyridine: first run 85 mg (49%, 5 mol% catalyst, 20 h) isolated as a 68:32 ratio of **3t**:**3s**. Second run 115 mg (66%, 5 mol% catalyst, 20 h) isolated as a 73:27 ratio of **3t**:**3s**. Reported chemical shifts are for the major isomer (**3t**) only.

$^1\text{H}$ -NMR (500 MHz;  $\text{CDCl}_3$ ):  $\delta$  7.37-7.33 (m, 5H), 5.24 (q,  $J = 6.7$  Hz, 1H), 5.12 (s, 3H), 2.34 (dt,  $J = 13.5, 7.0$  Hz, 3H), 2.07 (t,  $J = 7.5$  Hz, 2H), 1.78-1.71 (m, 3H), 1.69-1.66 (m, 3H), 1.58-1.52 (m, 5H), 0.96 (t,  $J = 7.4$  Hz, 1H), 0.89 (t,  $J = 6.9$  Hz, 1H).

$^{13}\text{C}$ -NMR (126 MHz;  $\text{CDCl}_3$ ):  $\delta$  173.7, 136.2, 134.9, 128.7, 128.39, 128.32, 128.29, 120.1, 66.3, 33.9, 30.6, 23.28, 23.16, 23.00, 13.4.

GC-MS  $m/z$  (% relative intensity, ion): 141.10 (51.58,  $M^+$ - $C_7H_7$ ), 97.10 (2.52,  $M^+$ - $C_8H_7O_2$ ), 91.00 (100.00,  $M^+$ - $C_6H_{13}O_2$ ).

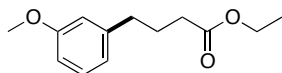

**ethyl 4-(3-methoxyphenyl)butanoate (3u) [CAS:57816-01-0].**<sup>31</sup> The general procedure was followed with 3-bromoanisole (95  $\mu$ L, 0.75 mmol, 1.00 equiv) and ethyl 4-bromobutanoate (107  $\mu$ L, 0.75 mmol, 1.00 equiv) at 60 °C for 19-25 h. The product was isolated by chromatography (9:1 hexanes: ether) as pale yellow oil. With 4,4'-dimethoxy-2, 2'-bipyridine: first run 115 mg (69%, 5 mol% catalyst, 25 h). Second run 130 mg (78%, 5 mol% catalyst, 19 h). With 1,10-phenanthroline: first run 116 mg (69%, 5 mol% catalyst, 25 h). Second run 134 mg (81%, 5 mol% catalyst, 19 h).

<sup>1</sup>H-NMR (500 MHz;  $CDCl_3$ ):  $\delta$  7.22-7.19 (m, 1H), 6.76 (dd,  $J = 17.1, 6.8$  Hz, 3H), 4.13 (q,  $J = 7.1$  Hz, 2H), 3.79 (s, 3H), 2.64 (t,  $J = 7.6$  Hz, 2H), 2.32 (t,  $J = 7.5$  Hz, 2H), 1.96 (quintet,  $J = 7.5$  Hz, 2H), 1.26 (t,  $J = 7.1$  Hz, 3H).

<sup>13</sup>C-NMR (126 MHz;  $CDCl_3$ ):  $\delta$  173.5, 159.7, 143.1, 129.4, 121.0, 114.3, 111.3, 60.3, 55.2, 35.2, 33.7, 26.5, 14.3.

GC-MS  $m/z$  (% relative intensity, ion): 222.05 (29.39,  $M^+$ ), 177.05 (24.70,  $M^+$ - $C_2H_5O$ ), 135.10 (33.51,  $M^+$ - $C_4H_7O_2$ ), 134.05 (100.00,  $M^+$ - $C_4H_8O_2$ ), 121.05 (30.30,  $M^+$ - $C_5H_9O_2$ ).

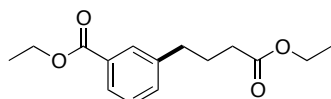

**ethyl 3-(4-ethoxy-4-oxobutyl)benzoate (3v) [CAS:364359-10-4].**<sup>32</sup> The general procedure was followed with ethyl-3-bromobenzoate (120  $\mu$ L, 0.75 mmol, 1.00 equiv) and ethyl 4-bromobutanoate (107  $\mu$ L, 0.75 mmol, 1.00 equiv) at 60 °C for 15-20 h. The product was isolated by chromatography (9:1 pentane: ether) as pale yellow oil. With 4,4'-dimethoxy-2, 2'-bipyridine: first run 136 mg (68%, 5 mol% catalyst, 20 h). With 1,10-phenanthroline: first run 159 mg (80%, 5 mol% catalyst, 17 h). Second run 167 mg (84%, 5 mol% catalyst, 15 h).

<sup>1</sup>H-NMR (500 MHz;  $CDCl_3$ ):  $\delta$  7.88 (dd,  $J = 7.8, 2.8$  Hz, 2H), 7.38-7.34 (m, 2H), 4.40-4.35 (m, 2H), 4.13 (q,  $J = 7.1$  Hz, 2H), 2.71 (t,  $J = 7.6$  Hz, 2H), 2.32 (dd,  $J = 9.9, 5.0$  Hz, 2H), 2.01-1.95 (m, 2H), 1.40 (t,  $J = 7.1$  Hz, 3H), 1.26 (t,  $J = 7.1$  Hz, 3H).

<sup>13</sup>C-NMR (126 MHz;  $CDCl_3$ ):  $\delta$  173.4, 166.8, 141.8, 133.1, 130.7, 129.6, 128.5, 127.4, 61.0, 60.4, 35.0, 33.7, 26.5, 14.47, 14.36.

GC-MS  $m/z$  (% relative intensity, ion): 264.10 (24.98,  $M^+$ ), 219.00 (48.48,  $M^+$ - $C_2H_5O$ ), 190.05 (100.00,  $M^+$ - $C_3H_6O_2$ ), 177.05 (73.39,  $M^+$ - $C_4H_2O_2$ ), 163.05 (29.30,  $M^+$ - $C_5H_3p_2$ ), 91.00 (78.92,  $M^+$ - $C_8H_{14}O_4$ ).

<sup>31</sup> Wilhelm, T.; Lautens, M. *Org. Lett.*, **2005**, 7, 4053-4056.

<sup>32</sup> Dohle, W.; Lindsay, D. M.; Knochel, P. *Org. Lett.*, **2001**, 3, 2871-2874.

### Compounds in Scheme 3: Aryl Chlorides

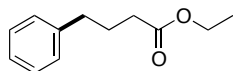

**ethyl 4-phenylbutanoate (3b)** [CAS:10031-93-3].<sup>17</sup> The general procedure was followed, omitting sodium iodide, with chlorobenzene (76  $\mu$ L, 0.75 mmol, 1.00 equiv) and ethyl 4-bromobutanoate (107  $\mu$ L, 0.75 mmol, 1.00 equiv) at 80 °C for 19-22 h. The product was isolated by chromatography (95:5 hexanes: ether) as pale yellow oil. With 4,4'-dimethoxy-2, 2'-bipyridine: first run 23 mg (16%, 5 mol% catalyst, 22 h). Second run with ethyl 4-bromobutanoate (135  $\mu$ L, 0.94 mmol, 1.25 equiv) 31 mg (22%, 5 mol% catalyst, 19 h).

<sup>1</sup>H-NMR (500 MHz; CDCl<sub>3</sub>):  $\delta$  7.28-7.18 (m, 5H), 4.13 (q,  $J$  = 7.1 Hz, 2H), 2.66 (t,  $J$  = 7.6 Hz, 2H), 2.32 (t,  $J$  = 7.5 Hz, 2H), 1.96 (quintet,  $J$  = 7.5 Hz, 2H), 1.25 (t,  $J$  = 7.1 Hz, 3H).

<sup>13</sup>C-NMR (126 MHz; CDCl<sub>3</sub>):  $\delta$  173.6, 141.6, 128.64, 128.52, 126.1, 60.4, 35.3, 33.9, 26.7, 14.4.

GC-MS  $m/z$  (% relative intensity, ion): 192.00 (16.22, M<sup>+</sup>), 147.05 (47.84, M<sup>+</sup>-C<sub>2</sub>H<sub>5</sub>O), 105.00 (23.77, M<sup>+</sup>-C<sub>4</sub>H<sub>7</sub>O<sub>2</sub>), 91.00 (100.00, M<sup>+</sup>-C<sub>5</sub>H<sub>9</sub>O<sub>2</sub>).

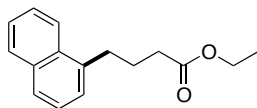

**ethyl 4-(naphthalen-1-yl)butanoate (3w)** [CAS:6326-89-2].<sup>33</sup> The general procedure was followed, omitting sodium iodide, with 1-chloronaphthalene (102  $\mu$ L, 0.75 mmol, 1.00 equiv, technical grade 1-chloronaphthalene (87:13 1-chloronaphthalene:2-chloronaphthalene) and ethyl 4-bromobutanoate (135  $\mu$ L, 0.94 mmol, 1.25 equiv) at 80 °C for 19-23 h. The product was isolated by chromatography (95:5 hexanes: ether) as yellow oil, which was a mixture of 1- and 2-alkylated naphthalenes. With 4,4'-dimethoxy-2, 2'-bipyridine: first run 50 mg (28%, 5 mol% catalyst, 23 h). Second run 53 mg (29%, 5 mol% catalyst, 19 h). Characterization data are for 1-alkylated product **3w** only.

<sup>1</sup>H-NMR (500 MHz; CDCl<sub>3</sub>):  $\delta$  8.08 (d,  $J$  = 8.3 Hz, 1H), 7.86 (d,  $J$  = 7.9 Hz, 1H), 7.73 (d,  $J$  = 8.1 Hz, 1H), 7.53-7.47 (m, 2H), 7.40 (t,  $J$  = 7.6 Hz, 1H), 7.33 (d,  $J$  = 6.7 Hz, 1H), 4.15 (q,  $J$  = 7.1 Hz, 2H), 3.13 (t,  $J$  = 7.7 Hz, 2H), 2.42 (t,  $J$  = 7.3 Hz, 2H), 2.10 (dt,  $J$  = 15.0, 7.4 Hz, 2H), 1.27 (t,  $J$  = 7.1 Hz, 3H).

<sup>13</sup>C-NMR (126 MHz; CDCl<sub>3</sub>):  $\delta$  173.6, 137.7, 134.1, 132.0, 128.9, 127.0, 126.3, 126.0, 125.6, 123.9, 60.5, 34.2, 32.5, 26.0, 14.4.

GC-MS  $m/z$  (% relative intensity, ion): 242.05 (29.68, M<sup>+</sup>), 154.05 (100.00, M<sup>+</sup>-C<sub>4</sub>H<sub>8</sub>O<sub>2</sub>), 141.00 (55.69, M<sup>+</sup>-C<sub>5</sub>H<sub>9</sub>O<sub>2</sub>), 115.00 (33.21, M<sup>+</sup>-C<sub>10</sub>H<sub>7</sub>).

<sup>33</sup> Dutta, A. K.; Ryan, W.; Thomas, B. F.; Singer, M.; Compton, D. R.; et al. *Bioorg. Med. Chem.*, **1997**, *5*, 1591-1600.

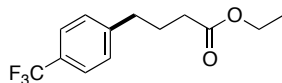

**ethyl 4-(4-(trifluoromethyl)phenyl)butanoate (3i)** [CAS:1235271-20-1].<sup>22</sup> The general procedure was followed, omitting sodium iodide, with 4-chlorobenzotrifluoride (100  $\mu$ L, 0.75 mmol, 1.00 equiv) and ethyl 4-bromobutanoate (135  $\mu$ L, 0.94 mmol, 1.25 equiv) at 80 °C for 18-19 h. The product was isolated by chromatography (95:5 hexanes: ether) as colorless oil. With 4,4'-dimethoxy-2, 2'-bipyridine: first run 109 mg (56%, 5 mol% catalyst, 18 h). Second run 115 mg (59%, 5 mol% catalyst, 19 h).

<sup>1</sup>H-NMR (500 MHz; CDCl<sub>3</sub>):  $\delta$  7.54 (d,  $J$  = 8.0 Hz, 2H), 7.29 (d,  $J$  = 7.9 Hz, 2H), 4.13 (q,  $J$  = 7.1 Hz, 2H), 2.71 (t,  $J$  = 7.6 Hz, 2H), 2.32 (t,  $J$  = 7.4 Hz, 2H), 1.97 (quintet,  $J$  = 7.5 Hz, 2H), 1.26 (t,  $J$  = 7.1 Hz, 3H).

<sup>13</sup>C-NMR (126 MHz; CDCl<sub>3</sub>):  $\delta$  173.3, 145.7, 128.9, 128.5 (q,  $J$  = 33.3 Hz), 125.4 (q,  $J$  = 3.8 Hz), 124.5 (q,  $J$  = 271.9 Hz), 60.5, 35.0, 33.6, 26.3, 14.3.

<sup>19</sup>F-NMR (376 MHz; CDCl<sub>3</sub>):  $\delta$  0.5.

GC-MS  $m/z$  (% relative intensity, ion): 260.05 (7.36, M<sup>+</sup>), 215.00 (17.04, M<sup>+</sup>-C<sub>2</sub>H<sub>5</sub>O), 159.00 (57.74, M<sup>+</sup>-C<sub>5</sub>H<sub>9</sub>O<sub>2</sub>), 88.00 (M+H -C<sub>9</sub>H<sub>8</sub>F<sub>3</sub>).

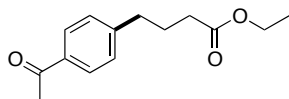

**ethyl 4-(4-acetylphenyl)butanoate (3d)** [CAS:71665-59-3].<sup>19</sup> The general procedure was followed, omitting sodium iodide, with 4'-chloroacetophenone (97  $\mu$ L, 0.75 mmol, 1.00 equiv) and ethyl 4-bromobutanoate (135  $\mu$ L, 0.94 mmol, 1.25 equiv) at 80 °C for 18-20 h. The product was isolated by chromatography (7:3 hexanes: ether) as pale yellow oil. With 4,4'-dimethoxy-2, 2'-bipyridine: first run 132 mg (75%, 5 mol% catalyst, 18 h). Second run 132 mg (75%, 5 mol% catalyst, 20 h).

<sup>1</sup>H-NMR (400 MHz; CDCl<sub>3</sub>):  $\delta$  7.89 (d,  $J$  = 8.2 Hz, 2H), 7.27 (d,  $J$  = 8.4 Hz, 3H), 4.13 (q,  $J$  = 7.1 Hz, 2H), 2.71 (t,  $J$  = 7.7 Hz, 2H), 2.58 (s, 3H), 2.32 (t,  $J$  = 7.4 Hz, 2H), 1.97 (quintet,  $J$  = 7.5 Hz, 2H), 1.25 (t,  $J$  = 7.1 Hz, 3H).

<sup>13</sup>C-NMR (126 MHz; CDCl<sub>3</sub>):  $\delta$  197.9, 173.3, 147.4, 135.4, 128.82, 128.71, 60.5, 35.2, 33.7, 26.7, 26.3, 14.4.

GC-MS  $m/z$  (% relative intensity, ion): 234.05 (34.83, M<sup>+</sup>), 21900 (10.38, M<sup>+</sup>-CH<sub>3</sub>), 147.05 (100.00, M<sup>+</sup>-C<sub>4</sub>H<sub>7</sub>O<sub>2</sub>), 146.05 (15.73, M<sup>+</sup>-C<sub>4</sub>H<sub>8</sub>O<sub>2</sub>), 118.00 (15.48, M<sup>+</sup>-C<sub>6</sub>H<sub>12</sub>O<sub>2</sub>).

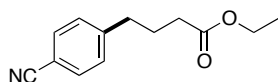

**ethyl 4-(4-cyanophenyl)butanoate (3h)** [CAS:131379-33-4].<sup>22</sup> The general procedure was followed, omitting sodium iodide, with 4-chlorobenzonitrile (103 mg, 0.75 mmol, 1.00 equiv) and ethyl 4-bromobutanoate (135  $\mu$ L, 0.94 mmol, 1.25 equiv) at 80 °C for 19-23 h. The product

was isolated by chromatography (8:2 hexanes: ether) as yellow oil. With 4,4'-dimethoxy-2, 2'-bipyridine: first run 144 mg (88%, 5 mol% catalyst, 23 h). Second run 149 mg (92%, 5 mol% catalyst, 19 h).

$^1\text{H-NMR}$  (500 MHz;  $\text{CDCl}_3$ ):  $\delta$  7.57 (d,  $J = 8.1$  Hz, 2H), 7.28 (d,  $J = 8.0$  Hz, 2H), 4.12 (q,  $J = 7.1$  Hz, 2H), 2.71 (t,  $J = 7.7$  Hz, 2H), 2.31 (t,  $J = 7.3$  Hz, 2H), 1.95 (quintet,  $J = 7.6$  Hz, 2H), 1.25 (t,  $J = 7.1$  Hz, 3H).

$^{13}\text{C-NMR}$  (126 MHz;  $\text{CDCl}_3$ ):  $\delta$  173.1, 147.2, 132.4, 129.4, 119.1, 110.1, 60.5, 35.3, 33.5, 26.1, 14.4.

GC-MS  $m/z$  (% relative intensity, ion): 216.95 (19.84,  $\text{M}^+\text{-H}$ ), 172.00 (44.22,  $\text{M}^+\text{-C}_2\text{H}_5\text{O}$ ), 130.05 (63.60,  $\text{M}^+\text{-C}_4\text{H}_7\text{O}_2$ ), 116.00 (100.00,  $\text{M}^+\text{-C}_5\text{H}_9\text{O}_2$ ), 88.00 (95.52,  $\text{M}^+\text{-C}_9\text{H}_8\text{N}$ ).

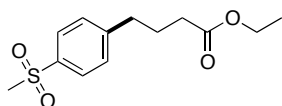

**ethyl 4-(4-(methylsulfonyl)phenyl)butanoate (3x).** The general procedure was followed, omitting sodium iodide, with 4-chlorophenyl-methylsulfone (143 mg, 0.75 mmol, 1.00 equiv) and ethyl 4-bromobutanoate (135  $\mu\text{L}$ , 0.94 mmol, 1.25 equiv) at 80  $^\circ\text{C}$  for 18 h. The product was isolated by chromatography (1:1 hexanes: ether) as yellow oil. With 4,4'-dimethoxy-2, 2'-bipyridine: first run 190 mg (94%, 5 mol% catalyst, 18 h). Second run 192 mg (94%, 5 mol% catalyst, 18 h).

$^1\text{H-NMR}$  (500 MHz;  $\text{CDCl}_3$ ):  $\delta$  7.84 (d,  $J = 8.2$  Hz, 2H), 7.37 (d,  $J = 8.1$  Hz, 2H), 4.11 (q,  $J = 7.1$  Hz, 2H), 3.02 (s, 3H), 2.73 (t,  $J = 7.7$  Hz, 2H), 2.31 (t,  $J = 7.3$  Hz, 2H), 1.96 (quintet,  $J = 7.5$  Hz, 2H), 1.24 (t,  $J = 7.1$  Hz, 3H).

$^{13}\text{C-NMR}$  (126 MHz;  $\text{CDCl}_3$ ):  $\delta$  173.1, 148.2, 138.3, 129.5, 127.6, 60.5, 44.6, 35.0, 33.5, 26.1, 14.3.

GC-MS  $m/z$  (% relative intensity, ion): 270.10 (12.17,  $\text{M}^+$ ), 183.00 (100.00,  $\text{M}^+\text{-C}_4\text{H}_7\text{O}_2$ ), 147.05 (20.00,  $\text{M}^+\text{-C}_3\text{H}_8\text{O}_3\text{S}$ ), 90.00 (30.34,  $\text{M}^+\text{-C}_6\text{H}_{12}\text{O}_4\text{S}$ ).

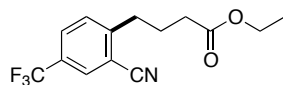

**ethyl 4-(2-cyano-4-(trifluoromethyl)phenyl)butanoate (3y).** The general procedure was followed, omitting sodium iodide, with 2-chloro-5-(trifluoromethyl)benzonitrile (154 mg, 0.75 mmol, 1.00 equiv) and ethyl 4-bromobutanoate (135  $\mu\text{L}$ , 0.94 mmol, 1.25 equiv) at 80  $^\circ\text{C}$  for 18 h. The product was isolated by chromatography (7:3 hexanes: ether) as yellow oil. With 4,4'-dimethoxy-2, 2'-bipyridine: first run 170 mg (80%, 5 mol% catalyst, 18 h). Second run 162 mg (76%, 5 mol% catalyst, 18 h).

$^1\text{H-NMR}$  (500 MHz;  $\text{CDCl}_3$ ):  $\delta$  7.87 (s, 1H), 7.76 (d,  $J = 8.1$  Hz, 1H), 7.50 (d,  $J = 8.1$  Hz, 1H), 4.13 (q,  $J = 7.1$  Hz, 2H), 2.95 (t,  $J = 7.8$  Hz, 2H), 2.38 (t,  $J = 7.3$  Hz, 2H), 2.02 (quintet,  $J = 7.6$  Hz, 2H), 1.25 (t,  $J = 7.1$  Hz, 3H).

$^{13}\text{C}$ -NMR (126 MHz;  $\text{CDCl}_3$ ):  $\delta$  172.8, 149.6, 130.5, 129.7 (dd,  $J_1 = 37.50$  Hz,  $J_2 = 3.43$  Hz), 123.1 (q,  $J = 272.31$ ), 116.6, 113.5, 33.8, 33.5, 25.7, 14.3.

$^{19}\text{F}$ -NMR (376 MHz;  $\text{CDCl}_3$ ):  $\delta$ -0.1.

GC-MS  $m/z$  (% relative intensity, ion): 285.1 (6.58,  $\text{M}^+$ ), 240.00 (16.97,  $\text{M}^+ - \text{C}_2\text{H}_5\text{O}$ ), 198.00 (12.97,  $\text{M}^+ - \text{C}_4\text{H}_7\text{O}_2$ ), 184.00 (43.54,  $\text{M}^+ - \text{C}_5\text{H}_9\text{O}_2$ ), 88.05 ( $\text{M} + \text{H} - \text{C}_{10}\text{H}_7\text{F}_3\text{N}$ ).

#### Compounds in Scheme 4.

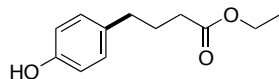

**ethyl 4-(4-hydroxyphenyl)butanoate (3z)** [CAS:62889-58-1].<sup>34</sup> The general procedure was followed with 4-bromophenol (130 mg, 0.75 mmol, 1.00 equiv) and ethyl 4-bromobutanoate (107  $\mu\text{L}$ , 0.75 mmol, 1.00 equiv) at 60  $^\circ\text{C}$  for 16 h. The product was isolated by chromatography (7:3 pentane: ether) mixed fractions were further purified by preparative TLC (7:3 pentane: ether, 1500  $\mu\text{m}$ ) as yellow oil. With 4,4'-dimethoxy-2, 2'-bipyridine: first run 116 mg (74%, 5 mol% catalyst, 16 h). Second run 115 mg (74%, 5 mol% catalyst, 16 h).

$^1\text{H}$ -NMR (500 MHz;  $\text{CDCl}_3$ ):  $\delta$  7.02 (d,  $J = 8.4$  Hz, 2H), 6.77-6.75 (m, 2H), 5.43 (s, 1H), 4.13 (q,  $J = 7.1$  Hz, 2H), 2.57 (t,  $J = 7.6$  Hz, 2H), 2.31 (t,  $J = 7.5$  Hz, 2H), 1.91 (t,  $J = 7.5$  Hz, 2H), 1.25 (t,  $J = 7.1$  Hz, 3H).

$^{13}\text{C}$ -NMR (126 MHz;  $\text{CDCl}_3$ ):  $\delta$  174.1, 154.0, 133.6, 129.7, 115.3, 60.6, 34.4, 33.8, 26.9, 14.4.

GC-MS  $m/z$  (% relative intensity, ion): 208.05 (17.05,  $\text{M}^+$ ), 163.05 (21.21,  $\text{M}^+ - \text{C}_2\text{H}_5\text{O}$ ), 121.05 (13.04,  $\text{M}^+ - \text{C}_4\text{H}_7\text{O}_2$ ), 120.00 (100.00,  $\text{M}^+ - \text{C}_4\text{H}_8\text{O}_2$ ), 107.00 (55.63,  $\text{M}^+ - \text{C}_5\text{H}_9\text{O}_2$ ).

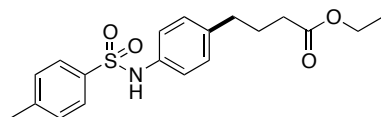

**ethyl 4-(4-(4-methylphenylsulfonamido)phenyl)butanoate (3aa)** [CAS:1138239-43-6].<sup>35</sup> The general procedure was followed with *N*-(4-bromophenyl)-4-methylbenzenesulfonamide (245 mg, 0.75 mmol, 1.00 equiv) and ethyl 4-bromobutanoate (107  $\mu\text{L}$ , 0.75 mmol, 1.00 equiv) at 60  $^\circ\text{C}$  for 16-23 h. The product was isolated by chromatography (75:25 hexanes: ethyl acetate) mixed fractions were further purified by preparative TLC (75:25 hexanes: ethyl acetate, 1500  $\mu\text{m}$ ) as viscous colorless oil. With 4,4'-dimethoxy-2, 2'-bipyridine: first run 221 mg (93%, 5 mol% catalyst, 23 h). Second run 233 mg (98%, 5 mol% catalyst, 16 h).

$^1\text{H}$ -NMR (400 MHz;  $\text{CDCl}_3$ ):  $\delta$  7.62 (d,  $J = 8.1$  Hz, 2H), 7.22 (d,  $J = 7.9$  Hz, 2H), 7.04 (d,  $J = 8.1$  Hz, 2H), 6.96 (d,  $J = 8.1$  Hz, 2H), 6.34 (s, 1H), 4.11 (q,  $J = 7.2$  Hz, 2H), 2.57 (t,  $J = 7.6$  Hz, 2H), 2.38 (s, 3H), 2.27 (t,  $J = 7.4$  Hz, 2H), 1.89 (quintet,  $J = 7.5$  Hz, 2H), 1.25 (t,  $J = 7.1$  Hz, 3H).

<sup>34</sup> Yi, C.S. Martinelli, L. C.; Blanton, C. D. *J. Org. Chem.*, **1978**, *43*, 405-409.

<sup>35</sup> Manolikakes, G.; Mayr, H.; Knochel, P.; Dong, Z.; Li, J. *Chem.-Eur. J.*, **2009**, *15*, 1324-1328.



$^{13}\text{C}$ -NMR (126 MHz;  $\text{CDCl}_3$ ):  $\delta$  173.4, 148.0, 145.4, 140.6, 132.6, 129.81, 129.62, 128.6, 122.3, 60.4, 34.6, 33.6, 26.4, 21.8, 14.3.

GC-MS  $m/z$  (% relative intensity, ion): 362.15 (18.42,  $\text{M}+\text{H}$ ), 317.15 (12.56,  $\text{M}+\text{H} - \text{C}_2\text{H}_5\text{O}$ ), 274.10 (33.32,  $\text{M}^+ \text{C}_4\text{H}_7\text{O}_2$ ), 207.1 (10.34,  $\text{M}^+ - \text{C}_7\text{H}_7\text{O}_2$ ), 155.05 (43.92,  $\text{M}^+ - \text{C}_{12}\text{H}_{16}\text{NO}_2$ ), 91.05 (100.00,  $\text{M}^+ - \text{C}_{12}\text{H}_{16}\text{NO}_4\text{S}$ ).

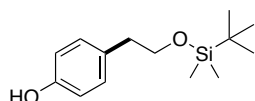

**4-(2-((*tert*-butyldimethylsilyloxy)ethyl)phenol (3ab) [CAS:96013-76-2].**<sup>36</sup> The general procedure was followed with 4-bromophenol (130 mg, 0.75 mmol, 1.00 equiv) and (2-bromoethoxy)(*tert*-butyl)dimethylsilane (225 mg, 0.94 mmol, 1.25 equiv) at 60 °C for 18-19 h. The product was isolated by chromatography (8:2 hexanes: acetone) as white solid. With 4,4'-dimethoxy-2, 2'-bipyridine: first run 148 mg (78%, 5 mol% catalyst, 16 h). Second run 138 mg (73%, 5 mol% catalyst, 16 h).

#### Procedure for the reaction run with activated zinc.

The general procedure was followed with 4-bromophenol (130 mg, 0.75 mmol, 1.00 equiv) and (2-bromoethoxy)(*tert*-butyl)dimethylsilane (225 mg, 0.94 mmol, 1.25 equiv), with the sequential addition of 1,2-dibromoethane (6  $\mu\text{L}$ ) and chlorotrimethylsilane (6  $\mu\text{L}$ ) as the last two reagents. The reaction was heated at 60 °C for 3.5 h. The product was isolated by chromatography (8:2 hexanes: acetone) mixed fractions were further purified by preparative TLC (8:2 hexanes: acetone, 1500  $\mu\text{m}$ ) as white solid. With 4,4'-dimethoxy-2, 2'-bipyridine: first run 123 mg (65%, 5 mol% catalyst, 16 h).

$^1\text{H}$ -NMR (500 MHz;  $\text{CDCl}_3$ ):  $\delta$  7.06 (d,  $J = 8.2$  Hz, 2H), 6.76 (d,  $J = 8.3$  Hz, 2H), 5.47 (s, 1H), 3.78 (t,  $J = 7.1$  Hz, 2H), 2.76 (t,  $J = 7.1$  Hz, 2H), 0.89 (s, 3i), 0.01 (s, 5H).

$^{13}\text{C}$ -NMR (126 MHz;  $\text{CDCl}_3$ ):  $\delta$  154.2, 130.4, 115.3, 65.0, 38.8, 26.1, 18.5, -5.2.

GC-MS  $m/z$  (% relative intensity, ion): 195.00 (100.00,  $\text{M}^+ - \text{C}_4\text{H}_{10}$ ), 177.05 (48.69,  $\text{M}^+ - \text{C}_4\text{H}_{11}\text{O}$ ), 121.05 (23.43,  $\text{M}^+ - \text{C}_6\text{H}_{15}\text{OSi}$ ).

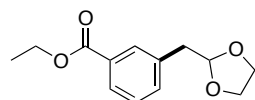

**ethyl 3-((1,3-dioxolan-2-yl)methyl)benzoate (3ac) [CAS:898776-72-2].** The general procedure was followed with ethyl-3-bromobenzoate (120  $\mu\text{L}$ , 0.75 mmol, 1.00 equiv) and 2-bromomethyl-1,3-dioxolane (97.3  $\mu\text{L}$ , 0.75 mmol, 1.00 equiv) using sodium iodide (112 mg, 0.75 mmol, 1.00 equiv) at 80 °C for 19-23 h. The product was isolated by chromatography (9:1 hexanes: acetone) as yellow oil. With 1,10-phenanthroline: first run 116 mg (66%, 5 mol% catalyst, 19 h). Second run 94 mg (53%, 5 mol% catalyst, 23 h).

<sup>36</sup> Shah, S. T. A.; Singh, S.; Guiry, P. J. *J. Org. Chem.*, **2009**, *74*, 2179-2182.

$^1\text{H-NMR}$  (400 MHz;  $\text{CDCl}_3$ ):  $\delta$  7.95-7.91 (m, 2H), 7.47 (d,  $J = 7.5$  Hz, 1H), 7.37 (t,  $J = 7.7$  Hz, 1H), 5.09 (t,  $J = 4.7$  Hz, 1H), 4.37 (q,  $J = 7.1$  Hz, 2H), 3.95-3.83 (m, 4H), 3.02 (d,  $J = 4.7$  Hz, 2H), 1.39 (t,  $J = 7.1$  Hz, 3H).

$^{13}\text{C-NMR}$  (126 MHz;  $\text{CDCl}_3$ ):  $\delta$  166.7, 136.5, 134.4, 130.9, 130.7, 128.4, 128.0, 104.4, 65.2, 61.0, 40.6, 14.5.

GC-MS  $m/z$  (% relative intensity, ion): 191.00 (8.06,  $\text{M}^+-\text{C}_2\text{H}_5\text{O}$ ), 119.00 (5.53,  $\text{M}^+-\text{C}_5\text{H}_{10}\text{O}_3$ ), 73.05 (100.00,  $\text{M}^+-\text{C}_{10}\text{H}_{11}\text{O}_2$ ).

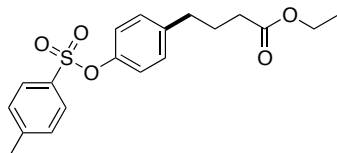

**ethyl 4-(4-(tosyloxy)phenyl)butanoate (3ad).** The general procedure was followed with 4-bromophenyl 4-methylbenzenesulfonate (245 mg, 0.75 mmol, 1.00 equiv) and ethyl 4-bromobutanoate (107  $\mu\text{L}$ , 0.75 mmol, 1.00 equiv) at 60  $^\circ\text{C}$  for 16 h. The product was isolated by chromatography (9:1 hexanes: ethyl acetate) as colorless oil. With 1, 10-phenanthroline: first run 206 mg (76%, 5 mol% catalyst, 16 h). Second run 207 mg (76%, 5 mol% catalyst, 16 h).

$^1\text{H-NMR}$  (400 MHz;  $\text{CDCl}_3$ ):  $\delta$  7.70 (d,  $J = 8.3$  Hz, 2H), 7.30 (d,  $J = 8.2$  Hz, 2H), 7.08 (d,  $J = 8.5$  Hz, 2H), 6.88 (d,  $J = 8.5$  Hz, 2H), 4.12 (q,  $J = 7.1$  Hz, 2H), 2.60 (t,  $J = 7.6$  Hz, 2H), 2.45 (s, 3H), 2.28 (t,  $J = 7.4$  Hz, 2H), 1.90 (quintet,  $J = 7.6$  Hz, 2H), 1.27-1.23 (m, 4H).

$^{13}\text{C-NMR}$  (126 MHz;  $\text{CDCl}_3$ ):  $\delta$  173.3, 147.9, 145.3, 140.6, 132.5, 129.78, 129.58, 128.5, 122.3, 60.4, 34.5, 33.6, 26.4, 21.7, 14.3.

GC-MS  $m/z$  (% relative intensity, ion): 362.15 (19.43,  $\text{M}^+$ ), 317.15 (12.75,  $\text{M}^+-\text{C}_2\text{H}_5\text{O}$ ), 274.10 (34.05,  $\text{M}^+-\text{C}_4\text{H}_7\text{O}_2$ ), 155.00 (45.43,  $\text{M}^+-\text{C}_{12}\text{H}_{15}\text{O}_3$ ), 91.05 (100.00,  $\text{M}^+-\text{C}_{12}\text{H}_{15}\text{O}_5\text{S}$ ).

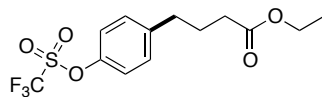

**ethyl 4-(4-(((trifluoromethyl)sulfonyl)oxy)phenyl)butanoate (3ae).** The general procedure was followed with 4-bromophenyl trifluoromethanesulfonate (229 mg, 0.75 mmol, 1.00 equiv) and ethyl 4-bromobutanoate (107  $\mu\text{L}$ , 0.75 mmol, 1.00 equiv) at 60  $^\circ\text{C}$  for 16-17 h. The product was isolated by chromatography (9:1 hexanes: ethyl acetate) as colorless oil. With 1, 10-phenanthroline: first run 182 mg (71%, 5 mol% catalyst, 17 h). Second run 195 mg (76%, 5 mol% catalyst, 16 h).

$^1\text{H-NMR}$  (400 MHz;  $\text{CDCl}_3$ ):  $\delta$  7.25 (d,  $J = 6.8$  Hz, 3H), 7.19 (d,  $J = 8.6$  Hz, 2H), 4.13 (q,  $J = 7.1$  Hz, 2H), 2.68 (t,  $J = 7.7$  Hz, 2H), 2.32 (t,  $J = 7.4$  Hz, 2H), 1.95 (quintet,  $J = 7.6$  Hz, 2H), 1.26 (t,  $J = 7.1$  Hz, 3H).

$^{13}\text{C-NMR}$  (126 MHz;  $\text{CDCl}_3$ ):  $\delta$  173.2, 148.0, 142.2, 130.3, 121.3, 118.9 (q,  $J = 321$  Hz,  $-\text{CF}_3$ ), 60.5, 34.5, 33.6, 26.4, 14.3.

$^{19}\text{F}$ -NMR (376 MHz;  $\text{CDCl}_3$ ):  $\delta$ -10.0.

GC-MS  $m/z$  (% relative intensity, ion): 340.20 (6.09,  $\text{M}^+$ ), 295.15 (16.31,  $\text{M}^+ - \text{C}_2\text{H}_5\text{O}$ ), 252.05 (12.95,  $\text{M}^+ - \text{C}_4\text{H}_7\text{O}_2$ ), 239.10 (5.56,  $\text{M}^+ - \text{C}_5\text{H}_9\text{O}_2$ ), 106.10 (20.69,  $\text{M}^+ - \text{C}_6\text{H}_9\text{F}_3\text{O}_4\text{S}$ ), 88.10 (100.00,  $\text{M}^+ - \text{C}_9\text{H}_8\text{F}_3\text{O}_3\text{S}$ ).

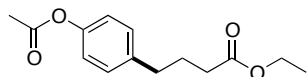

**ethyl 4-(4-acetoxyphenyl)butanoate (3af)** [CAS:155589-46-1].<sup>37</sup> The general procedure was followed with 4-bromophenyl acetate (161 mg, 0.75 mmol, 1.00 equiv) and ethyl 4-bromobutanoate (107  $\mu\text{L}$ , 0.75 mmol, 1.00 equiv) at 60  $^\circ\text{C}$  for 17-23 h. The product was isolated by chromatography (8:2 hexanes: ethyl acetate) mixed fractions were further purified by preparative TLC (8:2 hexanes: ethyl acetate, 1500  $\mu\text{m}$ ) as colorless oil. With 1, 10-phenanthroline: first run 126 mg (67%, 5 mol% catalyst, 17 h). Second run 115 mg (61%, 5 mol% catalyst, 23 h).

$^1\text{H}$ -NMR (500 MHz;  $\text{CDCl}_3$ ):  $\delta$  7.18 (d,  $J = 8.3$  Hz, 2H), 6.99 (d,  $J = 8.3$  Hz, 2H), 4.12 (q,  $J = 7.1$  Hz, 2H), 2.64 (t,  $J = 7.6$  Hz, 2H), 2.33-2.28 (m, 5H), 1.95 (q,  $J = 7.6$  Hz, 2H), 1.25 (t,  $J = 7.1$  Hz, 3H).

$^{13}\text{C}$ -NMR (126 MHz;  $\text{CDCl}_3$ ):  $\delta$  173.5, 169.7, 149.0, 139.1, 129.5, 121.5, 60.4, 34.6, 33.7, 26.6, 21.2, 14.4.

GC-MS  $m/z$  (% relative intensity, ion): 250.05 (2.14,  $\text{M}^+$ ), 208.05 (30.05,  $\text{M}^+ - \text{C}_2\text{H}_3\text{O}$ ), 205.05 (7.63,  $\text{M}^+ - \text{C}_2\text{H}_5\text{O}$ ), 163.05 (12.44,  $\text{M}^+ - \text{C}_4\text{H}_7\text{O}_2$ ), 120.00 (100.00,  $\text{M}^+ - \text{C}_6\text{H}_{10}\text{O}_3$ ).

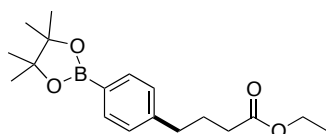

**ethyl 4-(4-(4,4,5,5-tetramethyl-1,3,2-dioxaborolan-2-yl)phenyl)butanoate (3ag)**. The general procedure was followed with 2-(4-bromophenyl)-4,4,5,5-tetramethyl-1,3,2-dioxaborolane (212 mg, 0.75 mmol, 1.00 equiv) and ethyl 4-bromobutanoate (107  $\mu\text{L}$ , 0.75 mmol, 1.00 equiv) at 60  $^\circ\text{C}$  for 19-20 h. The product was isolated by chromatography (75:25 hexanes: ether) as faintly yellow oil. With 1, 10-phenanthroline: first run 188 mg (79%, 5 mol% catalyst, 20 h). Second run 175 mg (73%, 5 mol% catalyst, 19 h).

$^1\text{H}$ -NMR (500 MHz;  $\text{CDCl}_3$ ):  $\delta$  7.74 (d,  $J = 7.6$  Hz, 2H), 7.20 (d,  $J = 7.7$  Hz, 2H), 4.12 (q,  $J = 7.1$  Hz, 2H), 2.66 (t,  $J = 7.6$  Hz, 2H), 2.30 (t,  $J = 7.4$  Hz, 2H), 1.95 (quintet,  $J = 7.5$  Hz, 2H), 1.34 (s, 3ae), 1.25 (t,  $J = 7.1$  Hz, 3H).

$^{13}\text{C}$ -NMR (126 MHz;  $\text{CDCl}_3$ ):  $\delta$  173.5, 144.9, 135.0, 128.0, 83.7, 60.3, 35.4, 33.7, 26.4, 24.9, 14.3.

<sup>37</sup> Klement, I.; Knochel, P.; Chau, K.; Cahiez, G. *Tetrahedron Lett.*, **1994**, 35, 1177-1180.

GC-MS *m/z* (% relative intensity, ion): 318.20 (51.36, M<sup>+</sup>), 273.15 (17.57, M<sup>+</sup>-C<sub>2</sub>H<sub>5</sub>O), 217.00 (19.45, M<sup>+</sup>-C<sub>5</sub>H<sub>9</sub>O<sub>2</sub>), 189.00 (16.20, M<sup>+</sup>-C<sub>8</sub>H<sub>17</sub>O), 117.05 (100.00, M<sup>+</sup>-C<sub>11</sub>H<sub>19</sub>O<sub>3</sub>), 101.05 (78.86, M<sup>+</sup>-C<sub>13</sub>H<sub>18</sub>BO<sub>2</sub>).

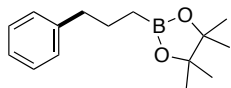

**4,4,5,5-tetramethyl-2-(3-phenylpropyl)-1,3,2-dioxaborolane (3ah)** [CAS:329685-40-7].<sup>38</sup> The general procedure was followed with 3-bromopropylboronic acid pinacol ester (158.6  $\mu$ L, 0.75 mmol, 1.00 equiv) and bromobenzene (80  $\mu$ L, 0.75 mmol, 1.00 equiv) at 60 °C for 15 h. The product was isolated by chromatography (95:5 hexanes: ether) as pale yellow oil. Mixed fractions were further purified by preparative TLC (1500  $\mu$ m thickness, 95:5 hexanes: ether). With 4,4'-dimethoxy-2, 2'-bipyridine: first run 89 mg (48%, 11 mol% catalyst, 15 h), second run 141 mg (70%, 11 mol% catalyst, 5 h). The general procedure was followed with 3-bromopropylboronic acid pinacol ester (158.6  $\mu$ L, 0.75 mmol, 1.00 equiv) and ethyl 4-bromobutanoate (134.5  $\mu$ L, 0.94 mmol, 1.25 equiv) at 60 °C for 15 h, second run 77 mg (41%, 11 mol% catalyst, 16 h).

<sup>1</sup>H-NMR (500 MHz; CDCl<sub>3</sub>):  $\delta$  7.29-7.16 (m, 5H), 2.63 (t, *J* = 7.7 Hz, 2H), 1.75 (quintet, *J* = 7.8 Hz, 2H), 1.26 (s, 3ae), 0.85 (t, *J* = 7.8 Hz, 2H).

<sup>13</sup>C-NMR (126 MHz; CDCl<sub>3</sub>):  $\delta$  142.8, 128.7, 128.3, 125.7, 83.0, 38.7, 26.2, 25.0.

GC-MS *m/z* (% relative intensity, ion): 127.10 (25.61, M<sup>+</sup>-C<sub>31</sub>H<sub>11</sub>), 119.05 (17.87, M<sup>+</sup>-C<sub>6</sub>H<sub>12</sub>BO<sub>2</sub>), 117.10 (19.21, M<sup>+</sup>-C<sub>9</sub>H<sub>11</sub>B), 91.05 (76.83, M<sup>+</sup>-C<sub>8</sub>H<sub>16</sub>BO<sub>2</sub>), 85.05 (100.00, M<sup>+</sup>-C<sub>9</sub>H<sub>15</sub>BO<sub>2</sub>).

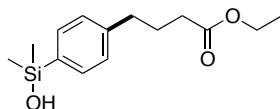

**ethyl 4-(4-(hydroxydimethylsilyl)phenyl)butanoate (3ai)**. The general procedure was followed with (4-bromophenyl)dimethylsilanol (173.4 mg, 0.75 mmol, 1.00 equiv) and ethyl 4-bromobutanoate (107  $\mu$ L, 0.75 mmol, 1.00 equiv) at 60 °C for 18 h. The product was isolated by chromatography (8:2 hexanes: ethyl acetate) mixed fractions were further purified by preparative TLC (8:2 hexanes: ethyl acetate, 1500  $\mu$ m) as colorless oil. With 4,4'-dimethoxy-2, 2'-bipyridine: first run 122 mg (61%, 5 mol% catalyst, 18 h). Second run 146 mg (73%, 5 mol% catalyst, 18 h).

<sup>1</sup>H-NMR (400 MHz; CDCl<sub>3</sub>):  $\delta$  7.52 (d, *J* = 7.9 Hz, 2H), 7.21 (d, *J* = 7.8 Hz, 2H), 4.12 (q, *J* = 7.1 Hz, 2H), 2.66 (t, *J* = 7.6 Hz, 2H), 2.32 (t, *J* = 7.5 Hz, 2H), 1.96 (quintet, *J* = 7.5 Hz, 2H), 1.76 (s, 1H), 1.25 (t, *J* = 7.1 Hz, 3H), 0.40 (s, 6H).

<sup>13</sup>C-NMR (101 MHz; CDCl<sub>3</sub>):  $\delta$  173.7, 143.0, 136.6, 133.3, 128.2, 60.5, 35.2, 33.8, 26.5, 14.3, 0.1.

<sup>38</sup> Lata, C. J.; Crudden, C. M. *J. Am. Chem. Soc.*, **2010**, *132*, 131-137.

GC-MS *m/z* (% relative intensity, ion): 265.15 (1.10, M<sup>+</sup>-H), 221.05 (18.94, M<sup>+</sup>-C<sub>2</sub>H<sub>5</sub>O), 178.10 (21.33, M<sup>+</sup>-C<sub>4</sub>H<sub>7</sub>O<sub>2</sub>), 150.00 (40.10, M<sup>+</sup>-C<sub>6</sub>H<sub>12</sub>O<sub>2</sub>), 147.05 (13.11, M<sup>+</sup>-C<sub>4</sub>H<sub>12</sub>O<sub>2</sub>Si), 105.00 (100.00, M<sup>+</sup>-C<sub>6</sub>H<sub>14</sub>O<sub>3</sub>Si).

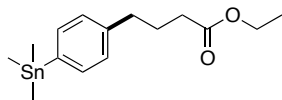

**ethyl 4-(4-(trimethylstannyl)phenyl)butanoate (3aj).** The general procedure was followed with (4-bromophenyl)trimethylstannane (239.9 mg, 0.75 mmol, 1.00 equiv) and ethyl 4-bromobutanoate (107  $\mu$ L, 0.75 mmol, 1.00 equiv) at 60 °C for 16 h. The product was isolated by chromatography (9:1 hexanes: ethyl acetate) as pale yellow oil. With 4,4'-dimethoxy-2, 2'-bipyridine: first run 233 mg (87%, 5 mol% catalyst, 16 h), second run 160 mg (60%, 5 mol% catalyst, 16 h).

<sup>1</sup>H-NMR (400 MHz; CDCl<sub>3</sub>):  $\delta$  7.48-7.35 (m, 2H), 7.17 (d, *J* = 7.6 Hz, 2H), 4.12 (q, *J* = 7.1 Hz, 2H), 2.63 (t, *J* = 7.6 Hz, 2H), 2.32 (t, *J* = 7.5 Hz, 2H), 1.95 (quintet, *J* = 7.5 Hz, 2H), 1.25 (t, *J* = 7.1 Hz, 3H), 0.34-0.20 (m, 3i).

<sup>13</sup>C-NMR (101 MHz; CDCl<sub>3</sub>):  $\delta$  173.5, 141.6, 139.2, 136.0, 128.4, 60.3, 35.2, 33.8, 26.6, 14.4, -9.5.

GC-MS *m/z* (% relative intensity, ion): 341.05 (100.00, M<sup>+</sup>-CH<sub>3</sub>), 164.95 (47.72, M<sup>+</sup>-C<sub>312</sub>H<sub>16</sub>O<sub>2</sub>), 147.00 (28.34, M<sup>+</sup>-C<sub>5</sub>H<sub>14</sub>Sn), 105.05 (90.23, M<sup>+</sup>-C<sub>7</sub>H<sub>16</sub>SnO<sub>2</sub>).

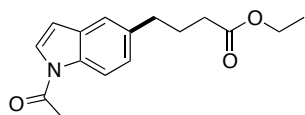

**ethyl 4-(1-acetyl-1H-indol-5-yl)butanoate (3ak).** The general procedure was followed with N-acetyl-5-bromoindole (176.3 mg, 0.74 mmol, 0.987 equiv) and ethyl 4-bromobutanoate (107  $\mu$ L, 0.75 mmol, 1.00 equiv) at 60 °C for 19 h. The product was isolated by chromatography (6:4 pentane: ether) as a pale yellow oil. Mixed fractions were further purified by preparative TLC silica plates (1500  $\mu$ m thickness, 6:4 pentane: ether). With 4,4'-dimethoxy-2, 2'-bipyridine: first run 160 mg (79%, 5 mol% catalyst, 19 h), second run 168 mg (78%, 5 mol% catalyst, 19 h).

<sup>1</sup>H-NMR (500 MHz; CDCl<sub>3</sub>):  $\delta$  8.33 (d, *J* = 6.9 Hz, 1H), 7.39-7.36 (m, 2H), 7.17 (dd, *J* = 8.5, 1.1 Hz, 1H), 6.58 (d, *J* = 3.7 Hz, 1H), 4.12 (q, *J* = 7.1 Hz, 2H), 2.74 (t, *J* = 7.6 Hz, 2H), 2.61 (s, 3H), 2.32 (t, *J* = 7.5 Hz, 2H), 1.99 (quintet, *J* = 7.5 Hz, 2H), 1.25 (t, *J* = 7.1 Hz, 3H).

<sup>13</sup>C-NMR (126 MHz; CDCl<sub>3</sub>):  $\delta$  173.6, 168.6, 137.0, 134.2, 130.8, 125.9, 125.5, 120.5, 116.4, 109.1, 60.4, 35.1, 33.7, 27.0, 24.0, 14.4.

GC-MS *m/z* (% relative intensity, ion): 273.10 (35.93, M<sup>+</sup>), 231.05 (13.40, M<sup>+</sup>-C<sub>2</sub>H<sub>3</sub>O), 186.05 (13.82, M<sup>+</sup>-C<sub>4</sub>H<sub>7</sub>O<sub>2</sub>), 130.05 (100.00, M<sup>+</sup>-C<sub>7</sub>H<sub>12</sub>O<sub>3</sub>).

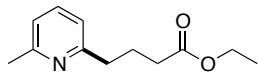

**ethyl 4-(6-methylpyridin-2-yl)butanoate (3a)** [CAS:100370-10-3]. The general procedure was followed with 2-chloro-6-methylpyridine (85.5  $\mu$ L, 0.75 mmol, 1.00 equiv) and ethyl 4-bromobutanoate (107  $\mu$ L, 0.75 mmol, 1.00 equiv) at 60  $^{\circ}$ C for 17 h. The product was isolated by chromatography (75:25 hexanes: ethyl acetate) as a pale yellow oil. With 1,10-phenanthroline: 40 mg (26%, 5 mol% catalyst, 17 h).

$^1$ H-NMR (500 MHz;  $\text{CDCl}_3$ ):  $\delta$  7.48 (t,  $J = 7.5$  Hz, 1H), 6.96 (t,  $J = 7.3$  Hz, 2H), 4.12 (q,  $J = 7.0$  Hz, 2H), 2.79 (t,  $J = 7.5$  Hz, 2H), 2.53 (s, 3H), 2.35 (t,  $J = 7.5$  Hz, 2H), 2.08-2.02 (m, 3H), 1.25 (t,  $J = 6.9$  Hz, 3H).

$^{13}$ C-NMR (126 MHz;  $\text{CDCl}_3$ ):  $\delta$  173.6, 158.0, 136.7, 120.8, 119.8, 60.4, 37.7, 33.9, 25.3, 24.6, 14.4.

GC-MS  $m/z$  (% relative intensity, ion): 207.25 (3.21,  $\text{M}^+$ ), 162.15 (20.29,  $\text{M}^+ - \text{C}_2\text{H}_5\text{O}$ ), 134.20 (42.21,  $\text{M}^+ - \text{C}_3\text{H}_5\text{O}_2$ ), 120.05 (45.55,  $\text{M}^+ - \text{C}_4\text{H}_7\text{O}_2$ ), 107.05 (100.00,  $\text{M}^+ - \text{C}_5\text{H}_9\text{O}_2$ ).

7.517  
7.501  
7.441  
7.425

2.328

0.378

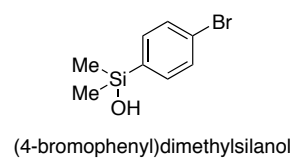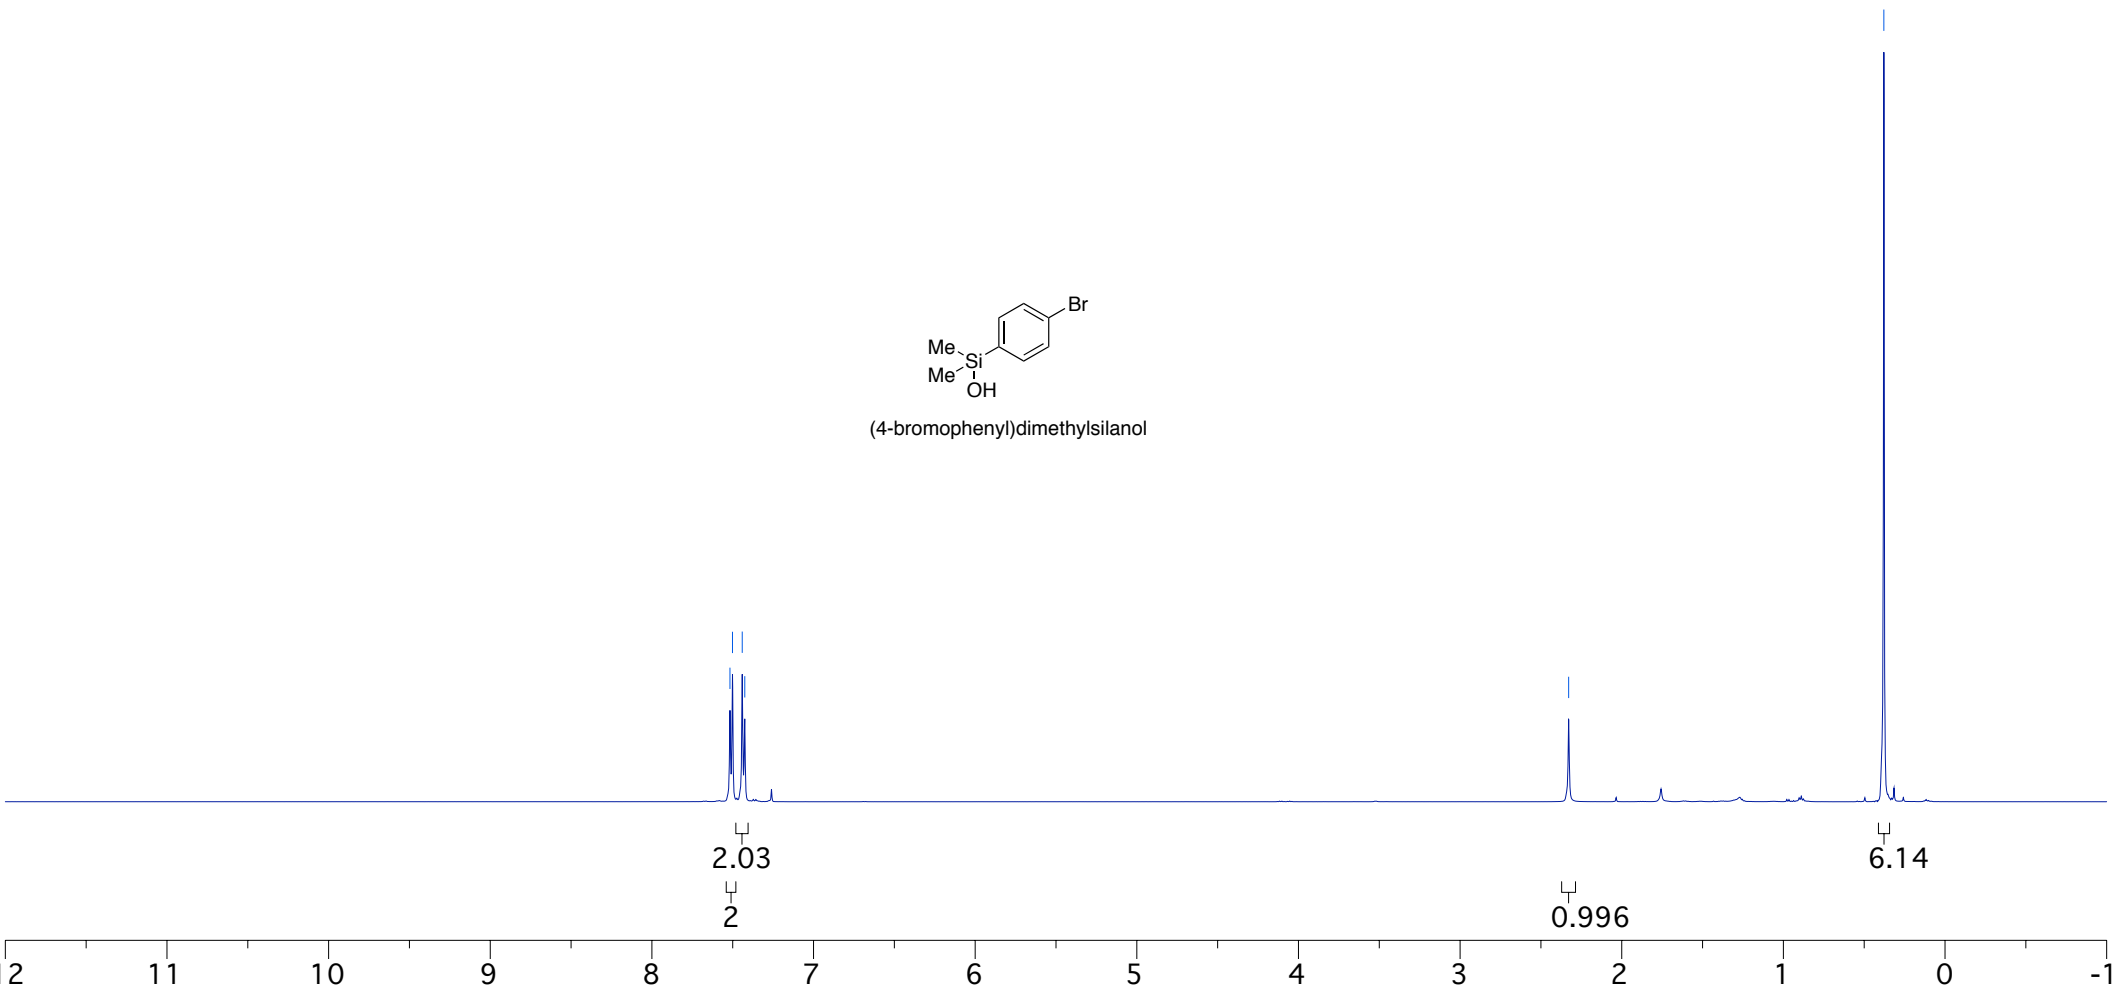

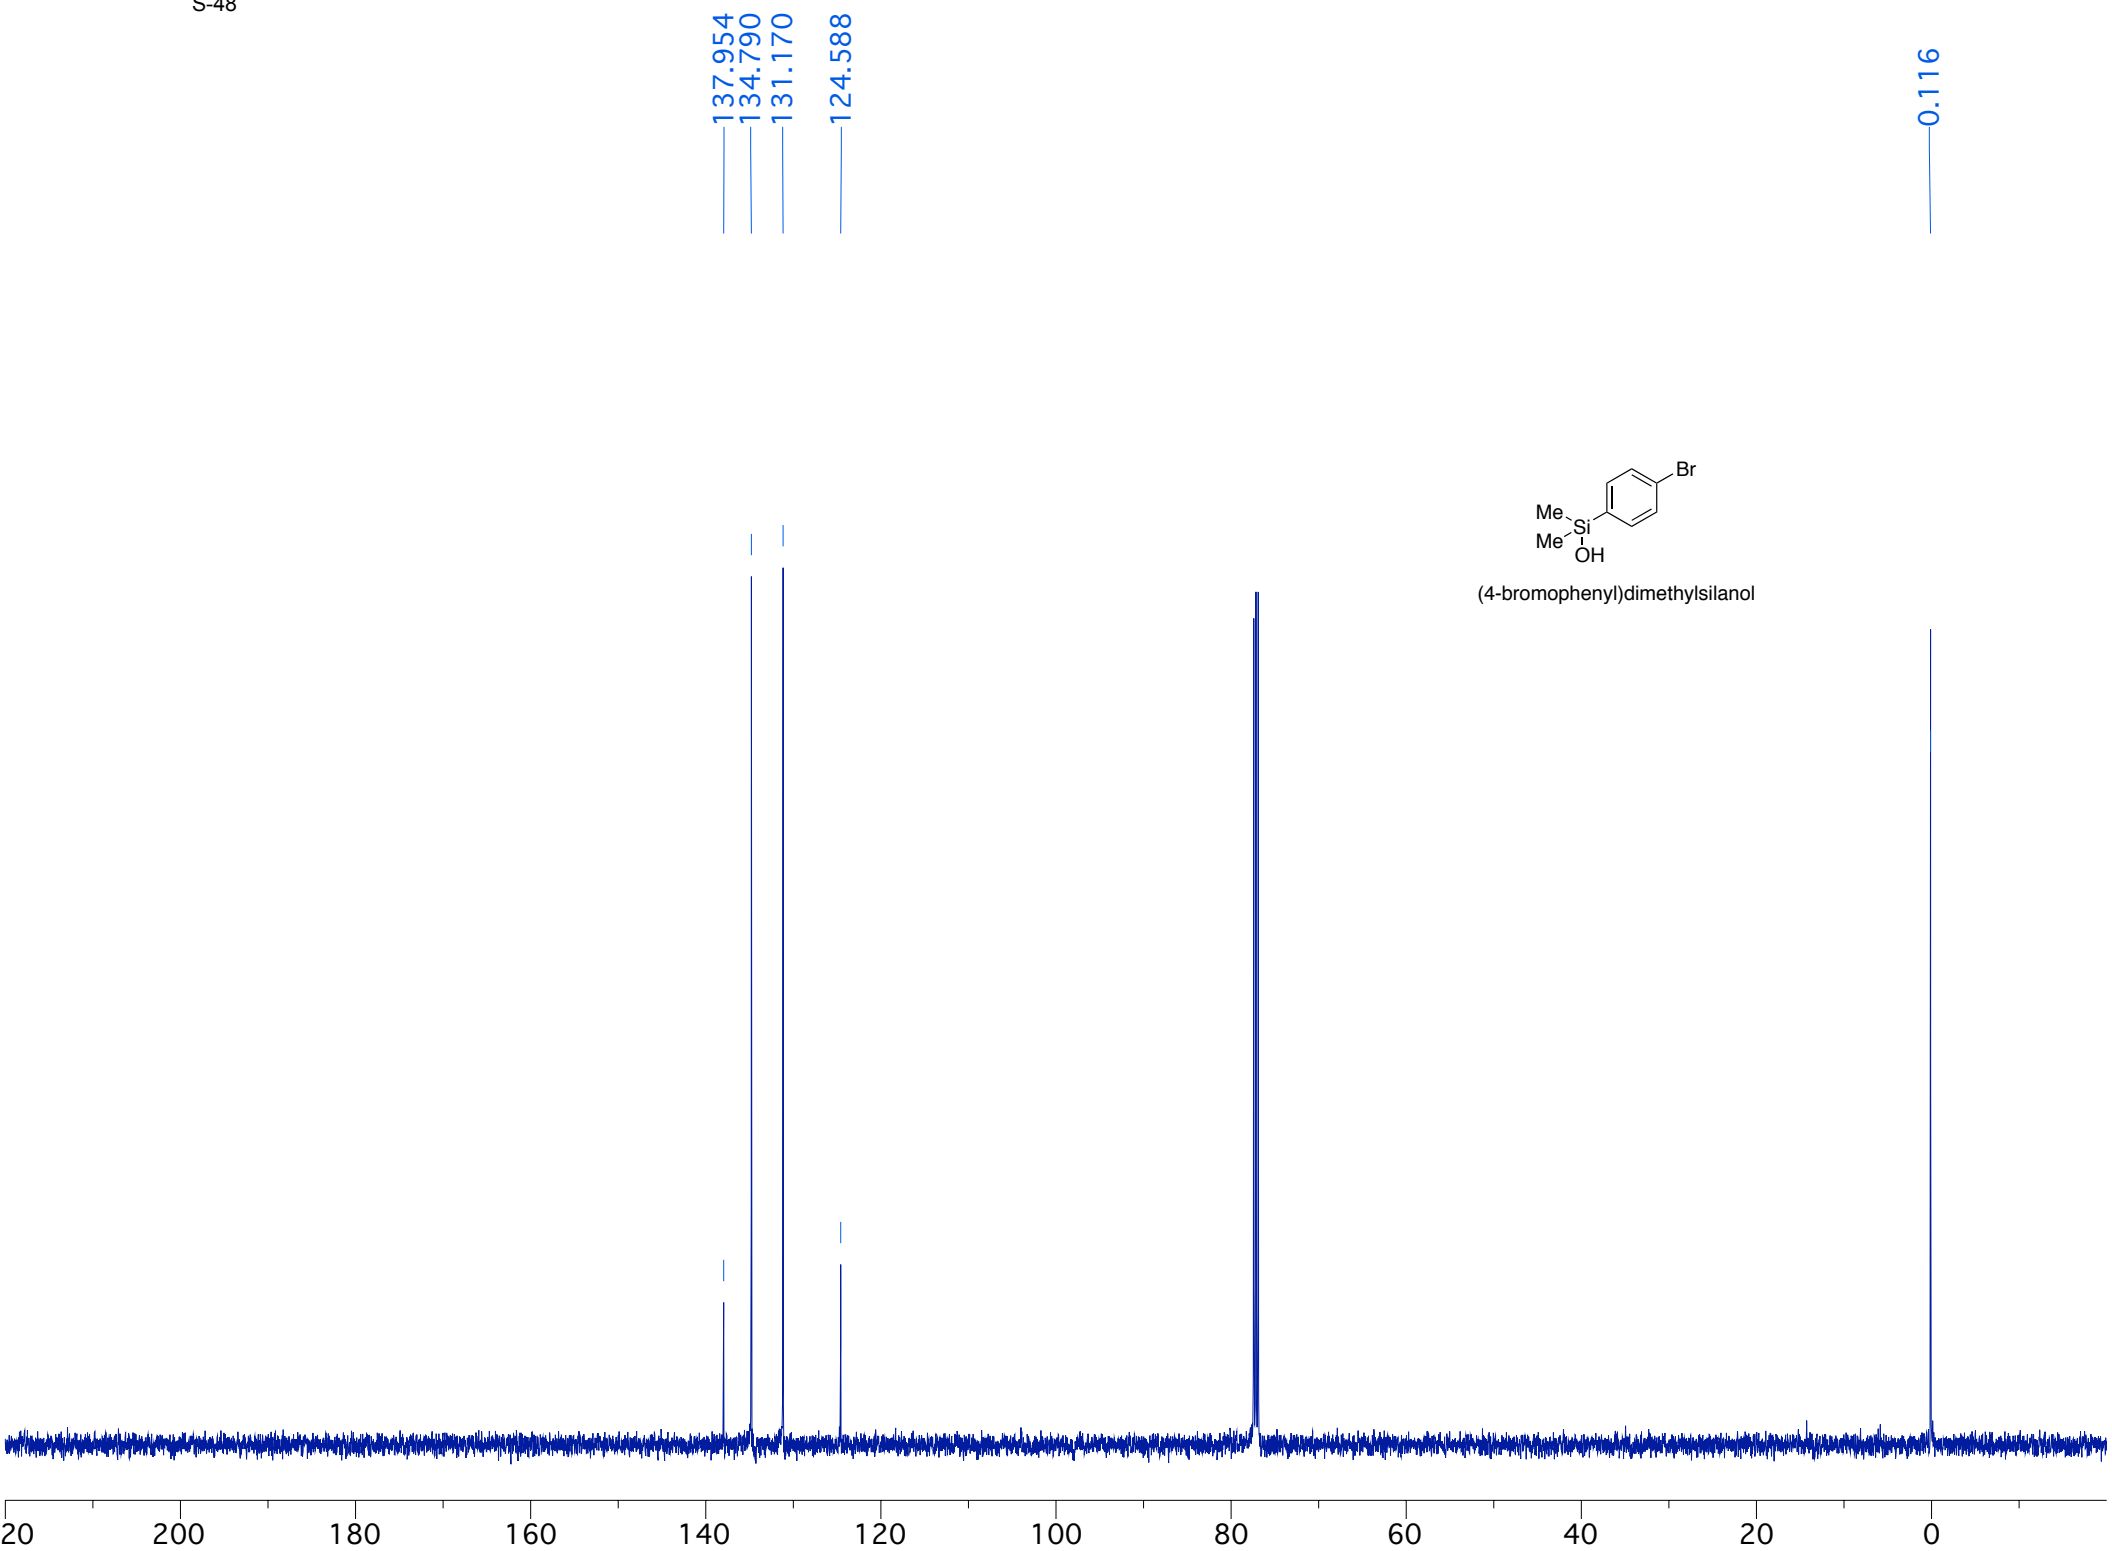



S-49

7.353  
7.338  
7.323  
7.312  
7.260  
7.258  
7.245  
7.242  
7.228

4.199  
4.184  
4.170  
4.156

2.721  
2.706  
2.691  
2.388  
2.373  
2.358  
2.042  
2.026  
2.011  
1.996  
1.981  
1.321  
1.307  
1.292

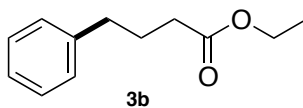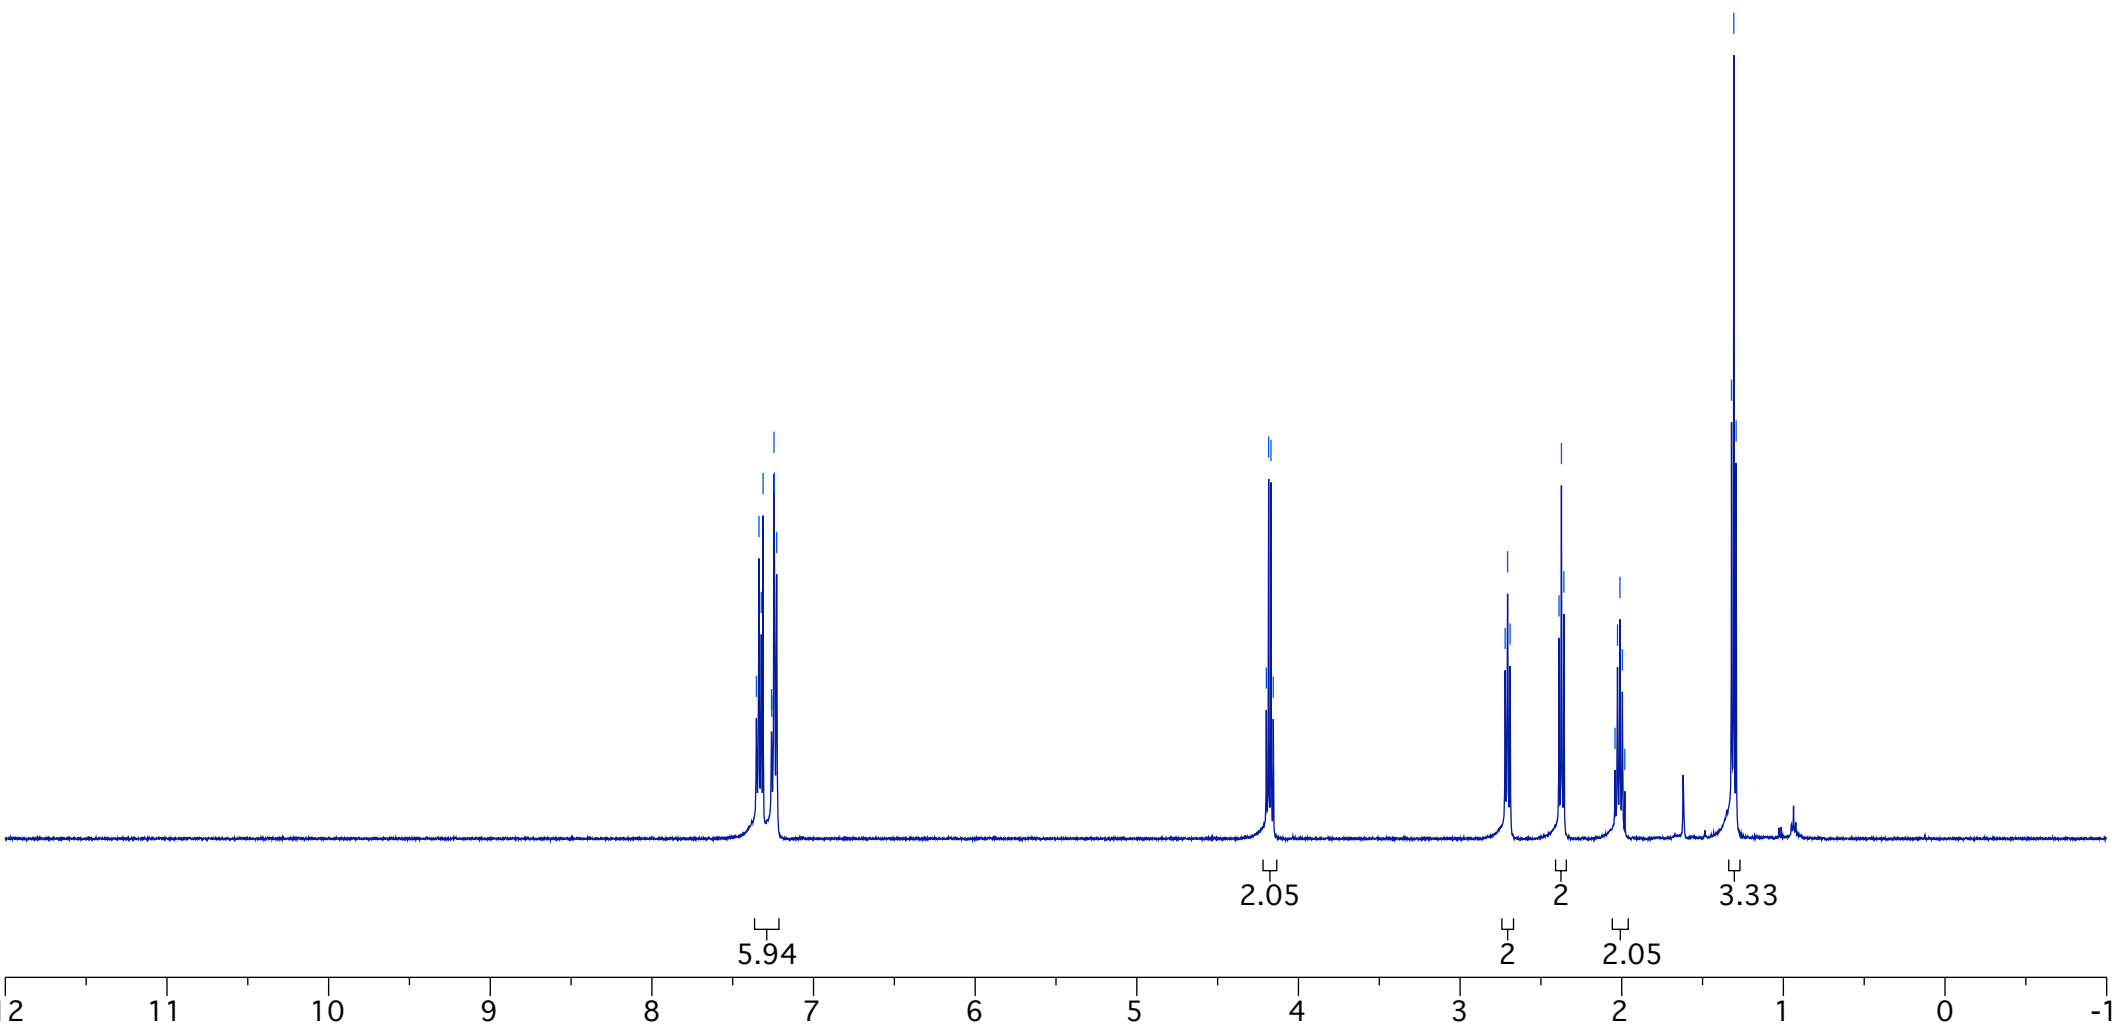

173.614

141.570

128.613

128.494

126.080

60.379

35.281

33.814

26.684

14.384

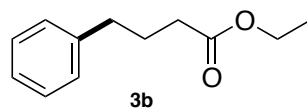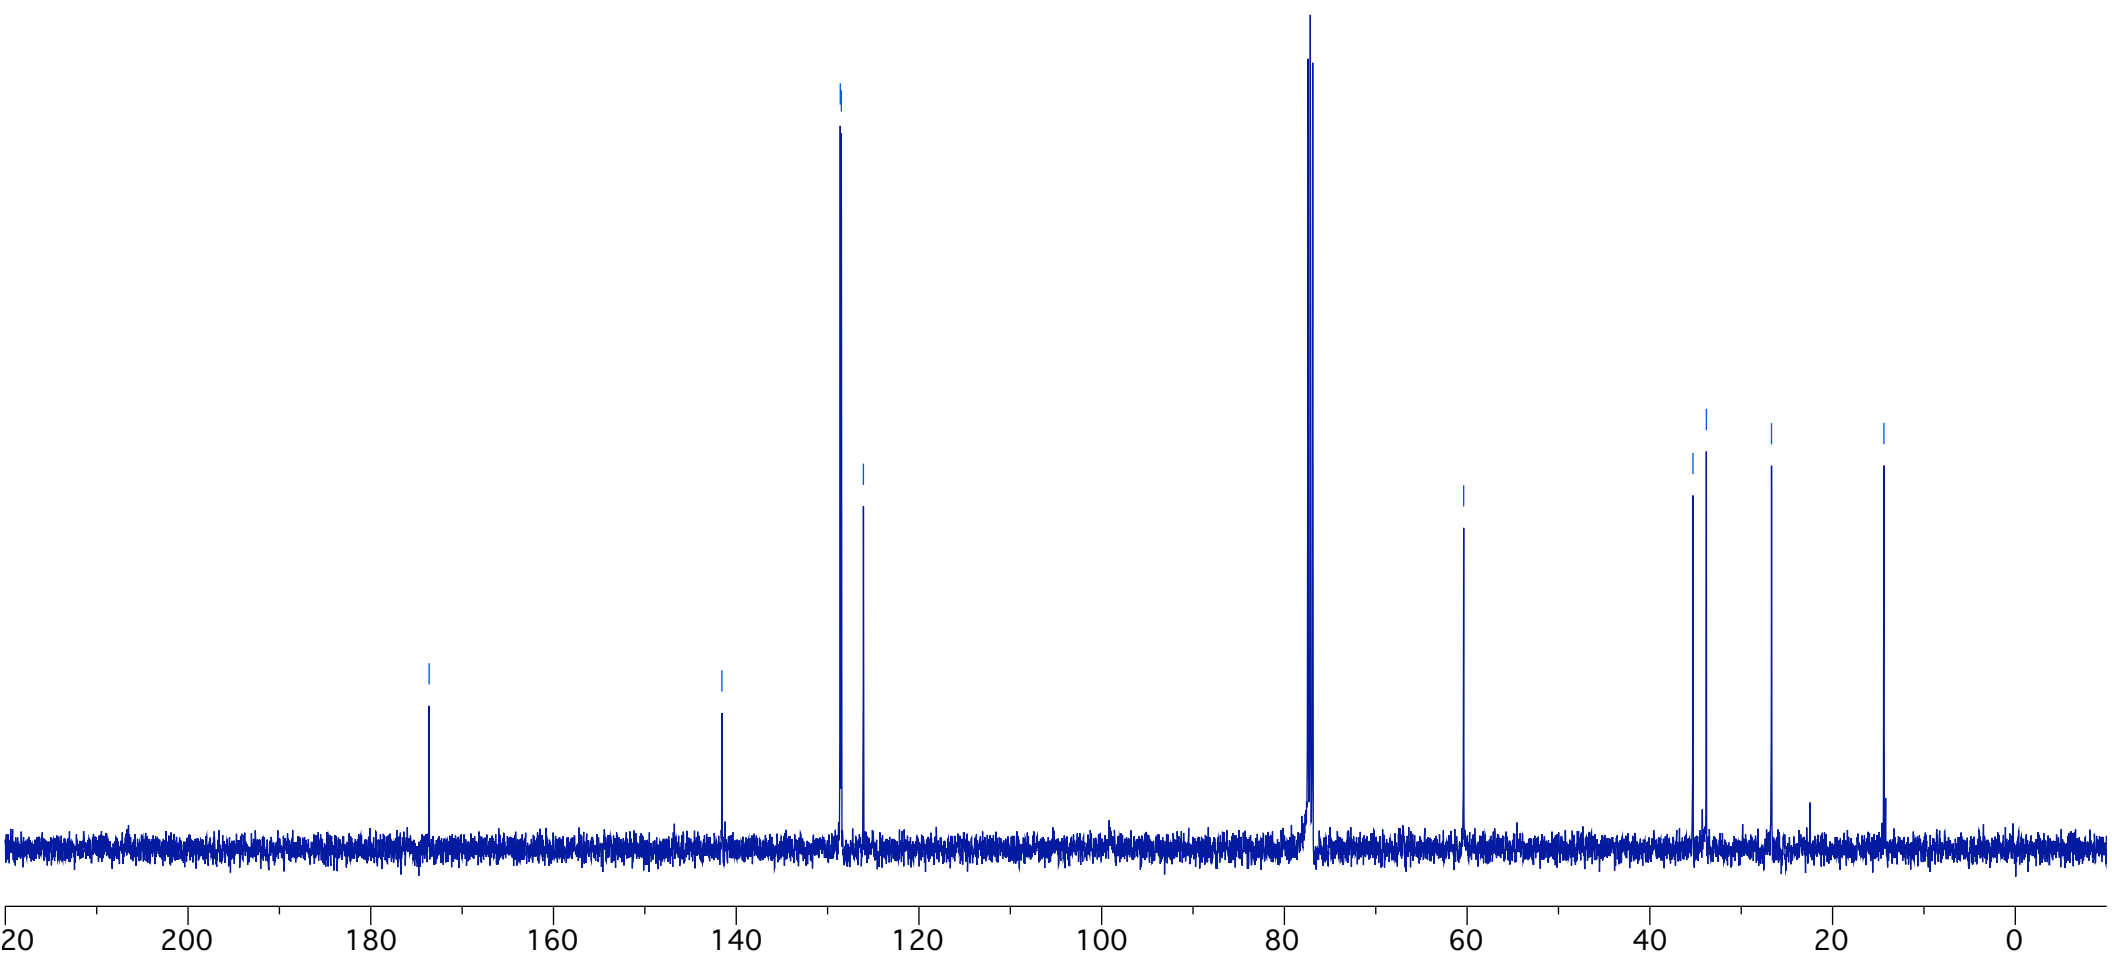

S-51

7.105  
7.084  
6.839  
6.818

4.148  
4.130  
4.113  
4.095  
3.787

2.611  
2.593  
2.574  
2.322  
2.303  
2.284  
1.956  
1.937  
1.919  
1.900  
1.881  
1.269  
1.251  
1.233

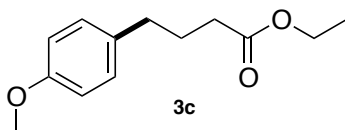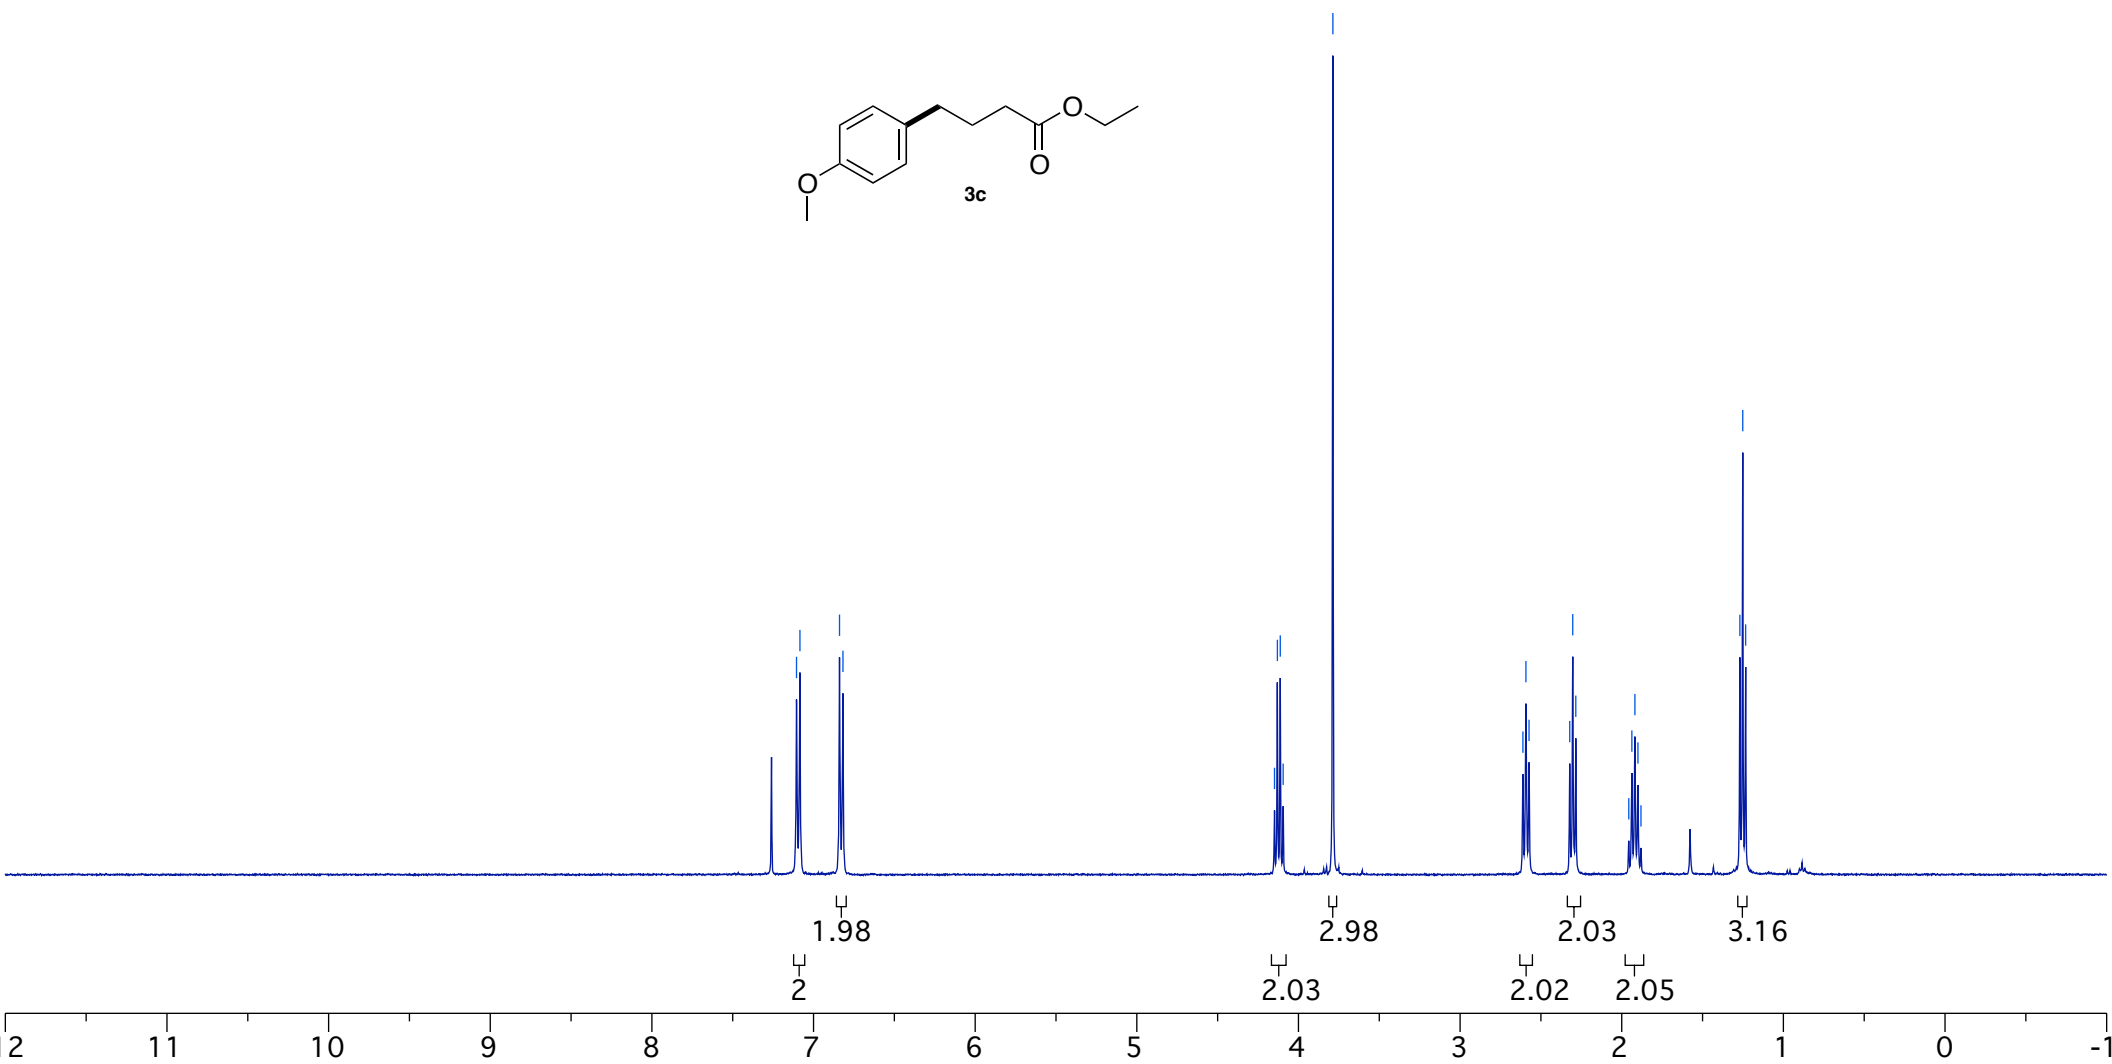

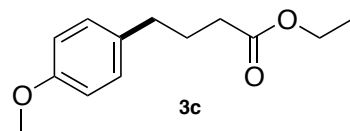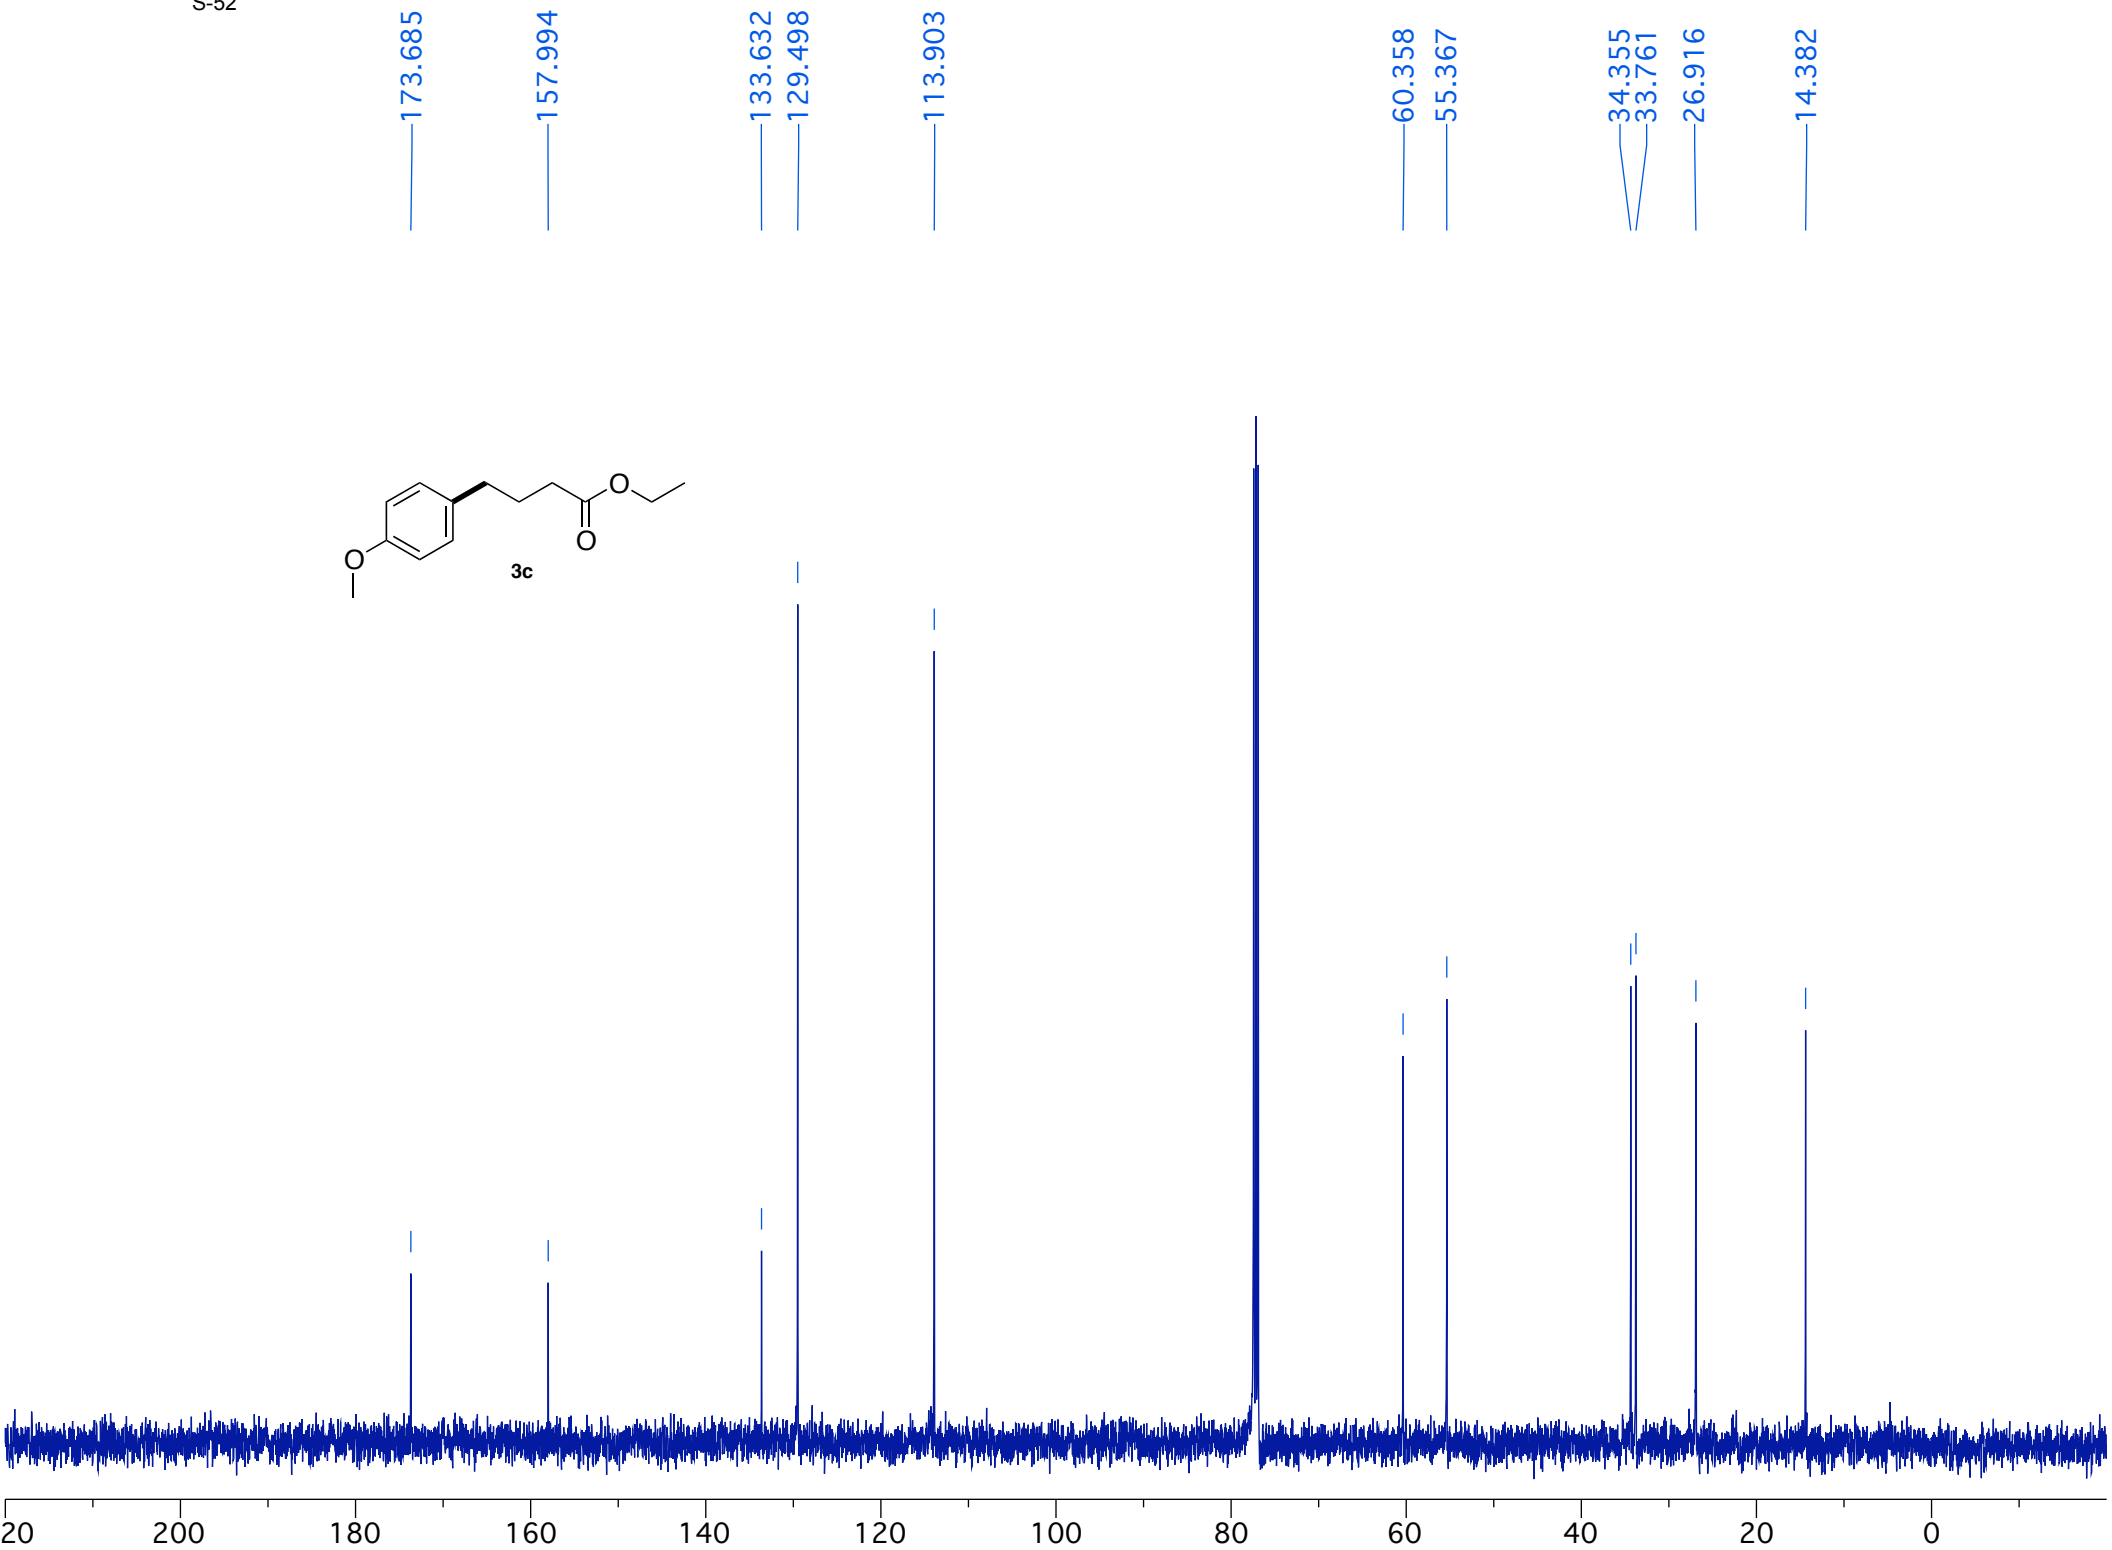

7.894  
7.8787.281  
7.2654.149  
4.134  
4.120  
4.1062.728  
2.713  
2.697  
2.583  
2.335  
2.320  
2.305  
2.003  
1.987  
1.972  
1.957  
1.943  
1.268  
1.253  
1.239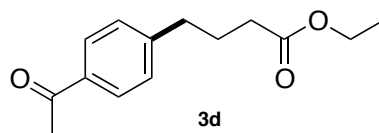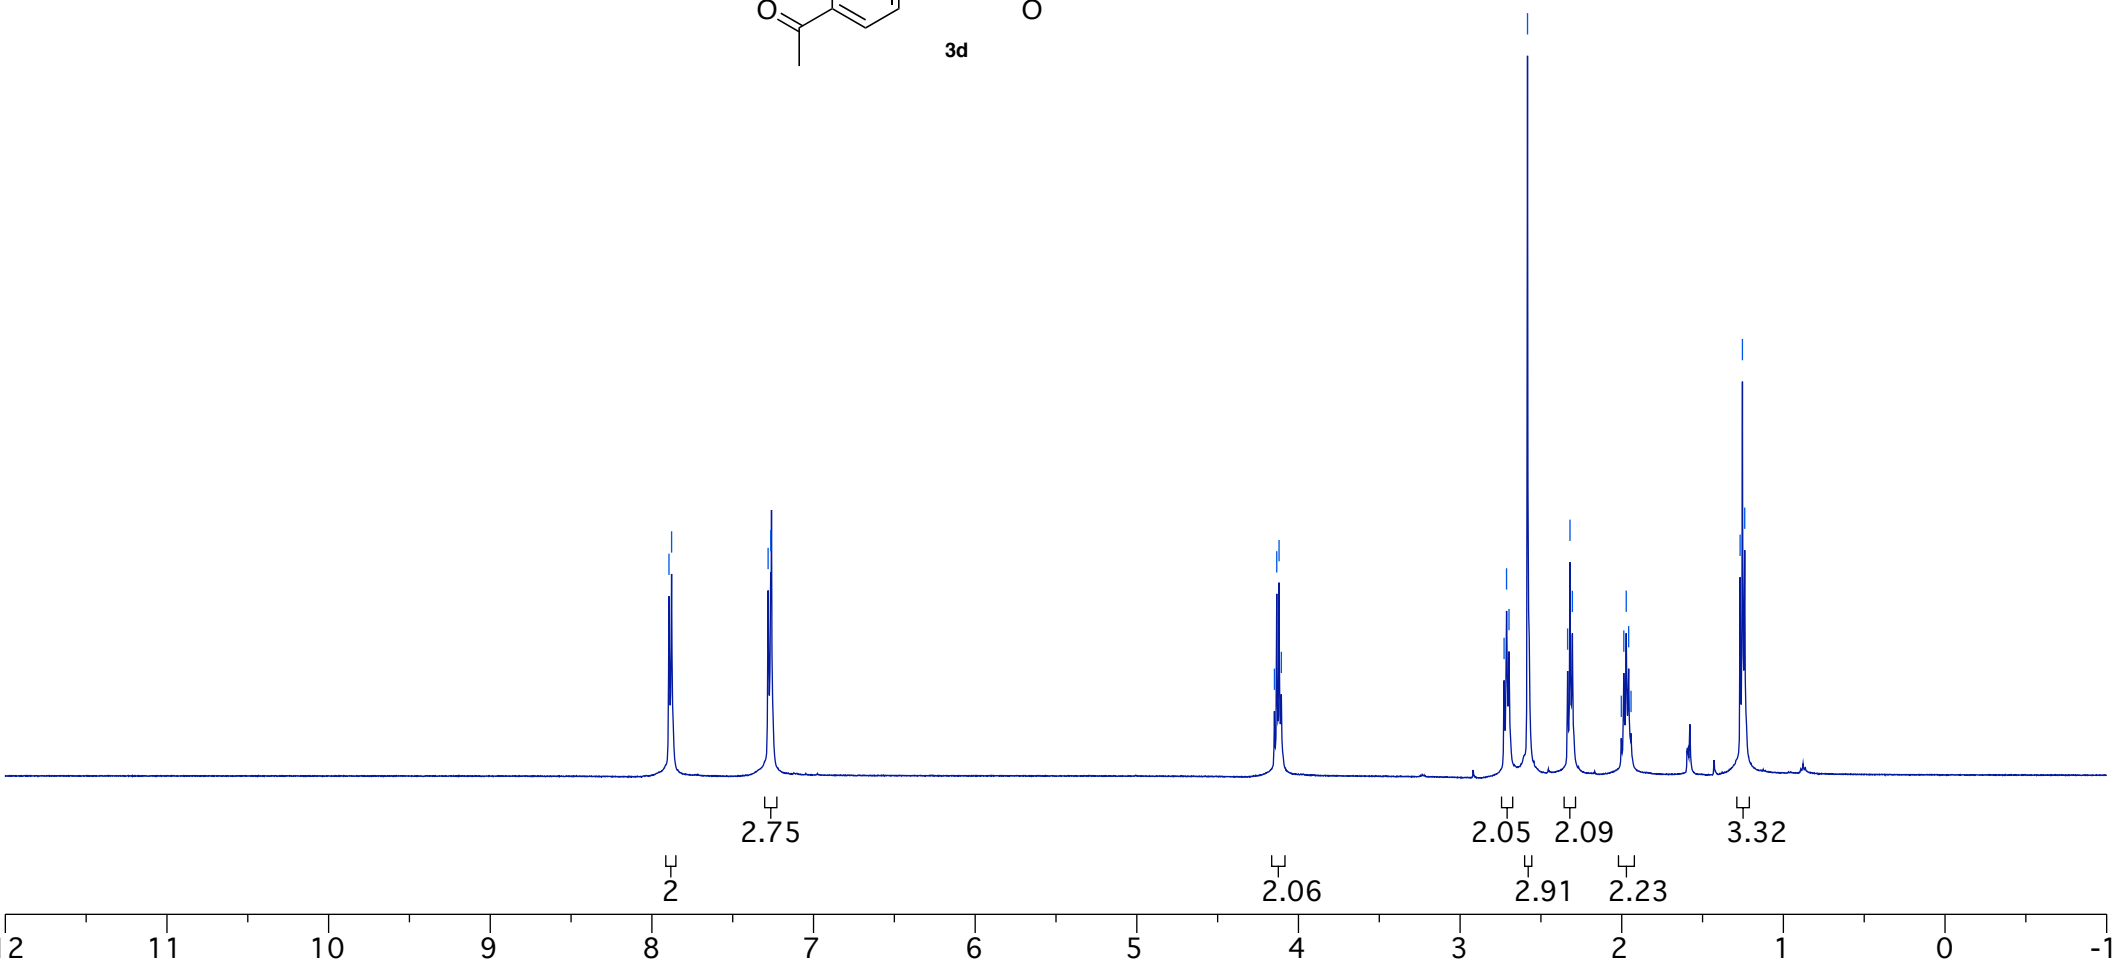

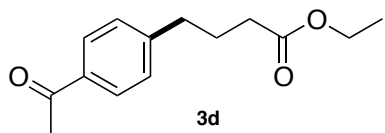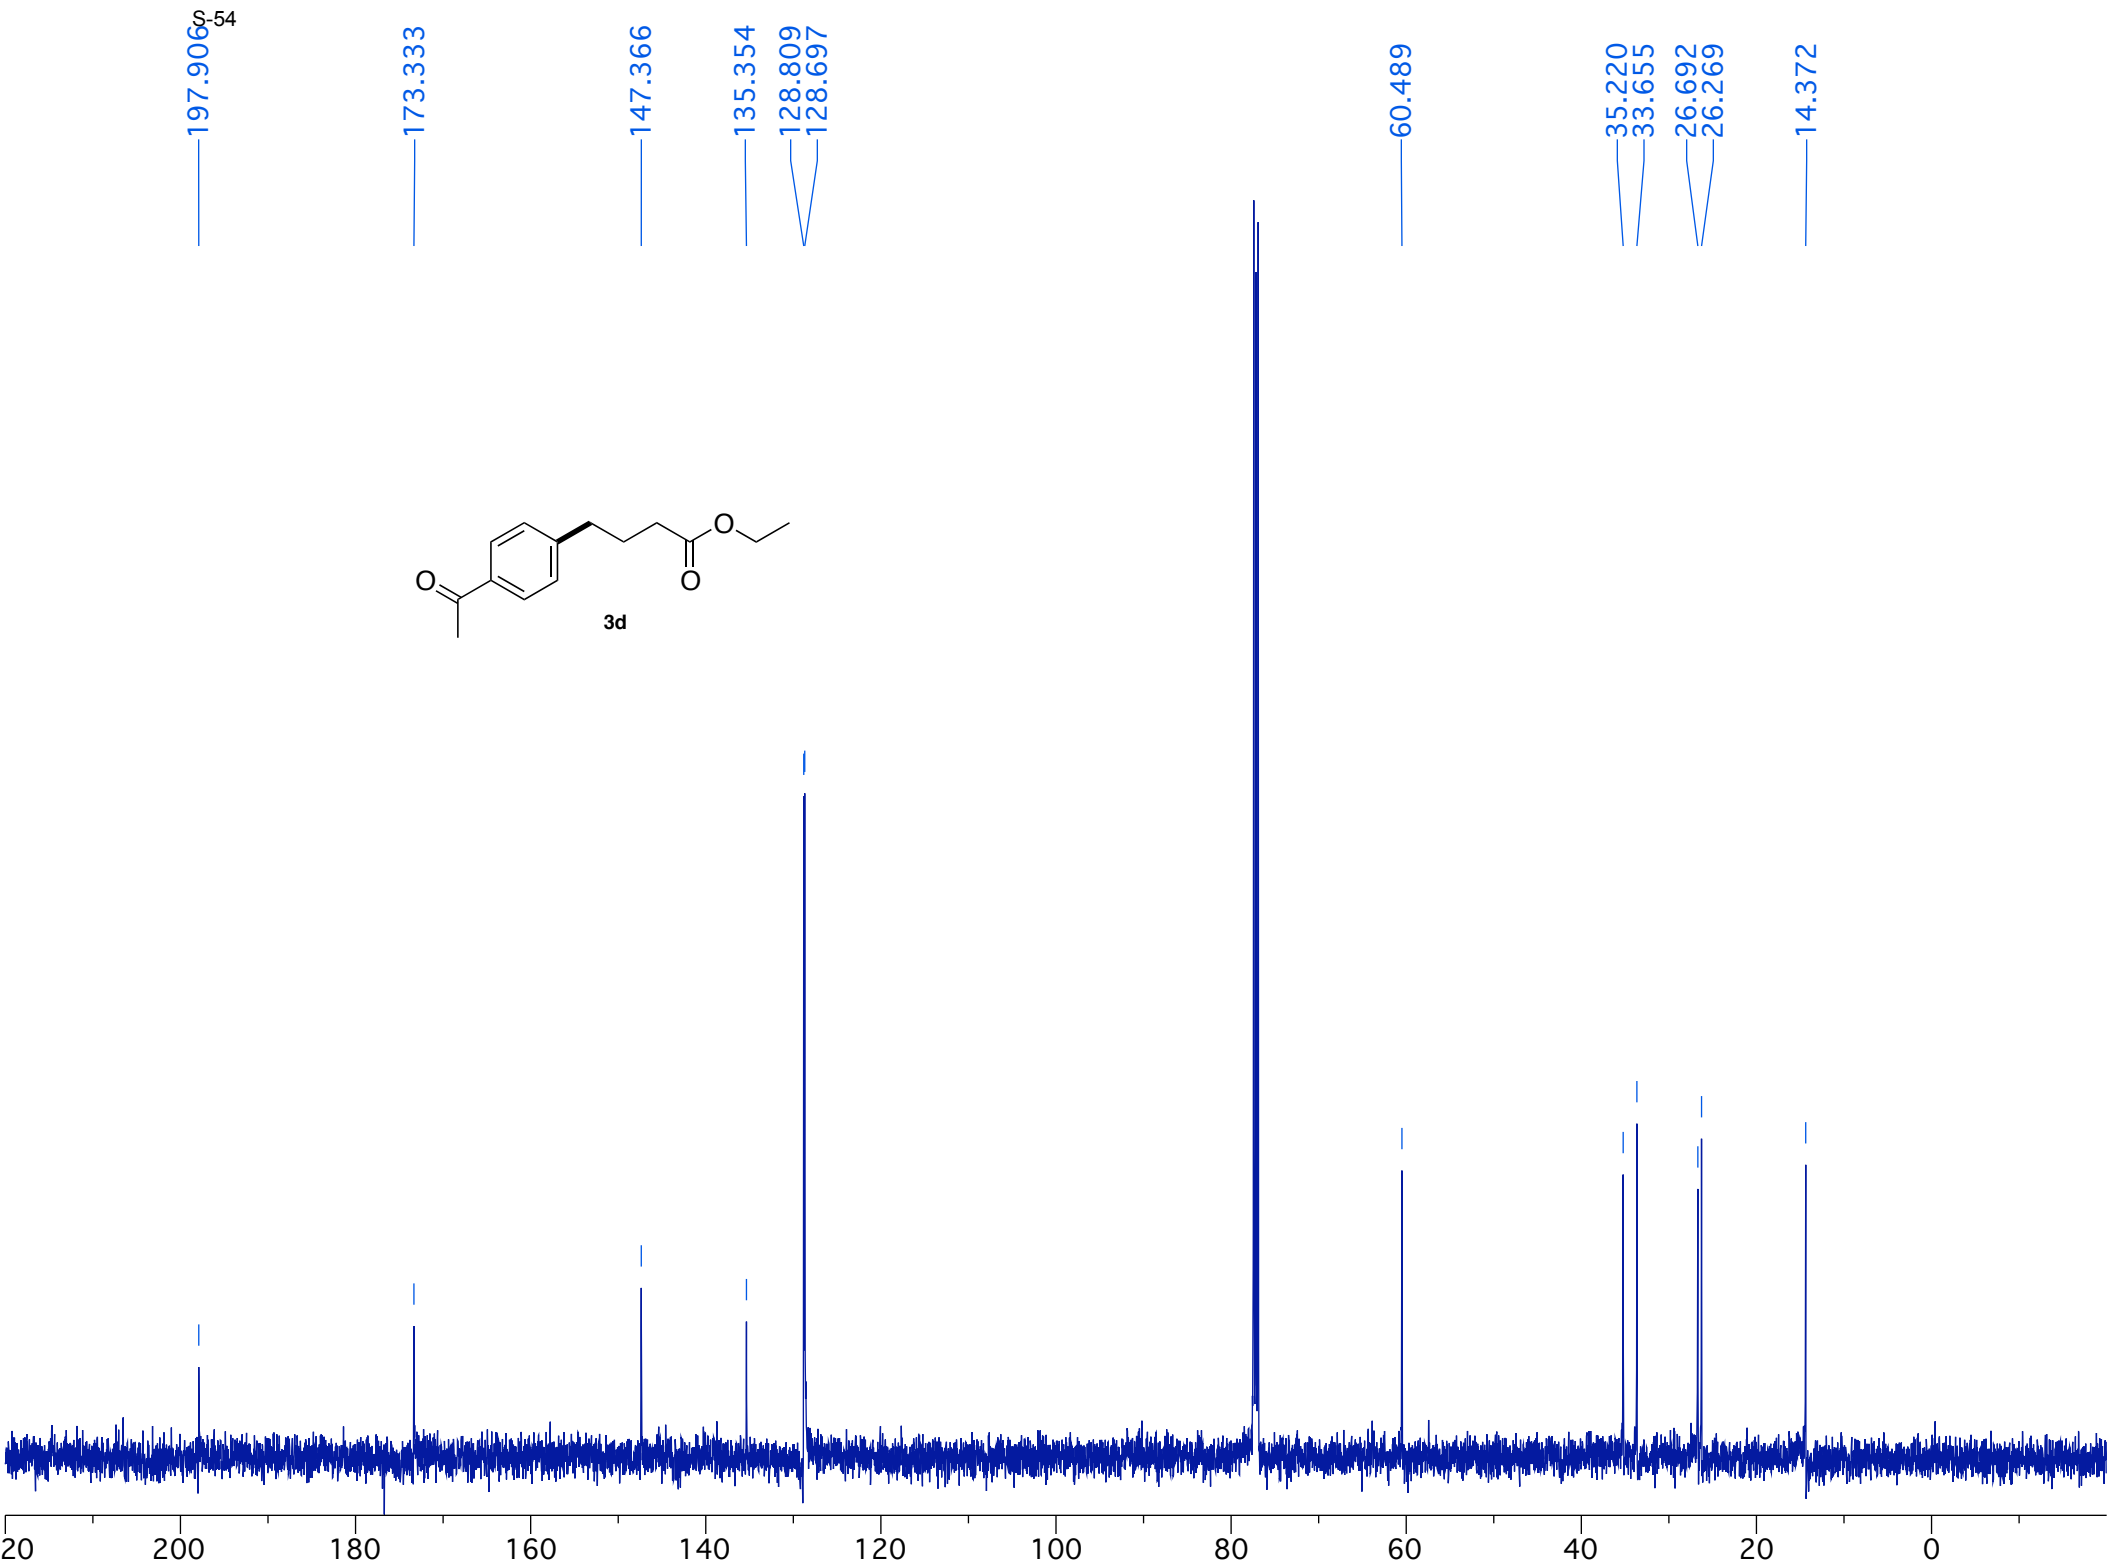

7.072  
7.055  
6.711  
6.6944.148  
4.134  
4.119  
4.1052.917  
2.580  
2.565  
2.550  
2.328  
2.313  
2.298  
1.948  
1.932  
1.917  
1.902  
1.888  
1.270  
1.256  
1.242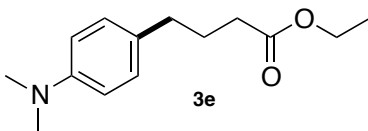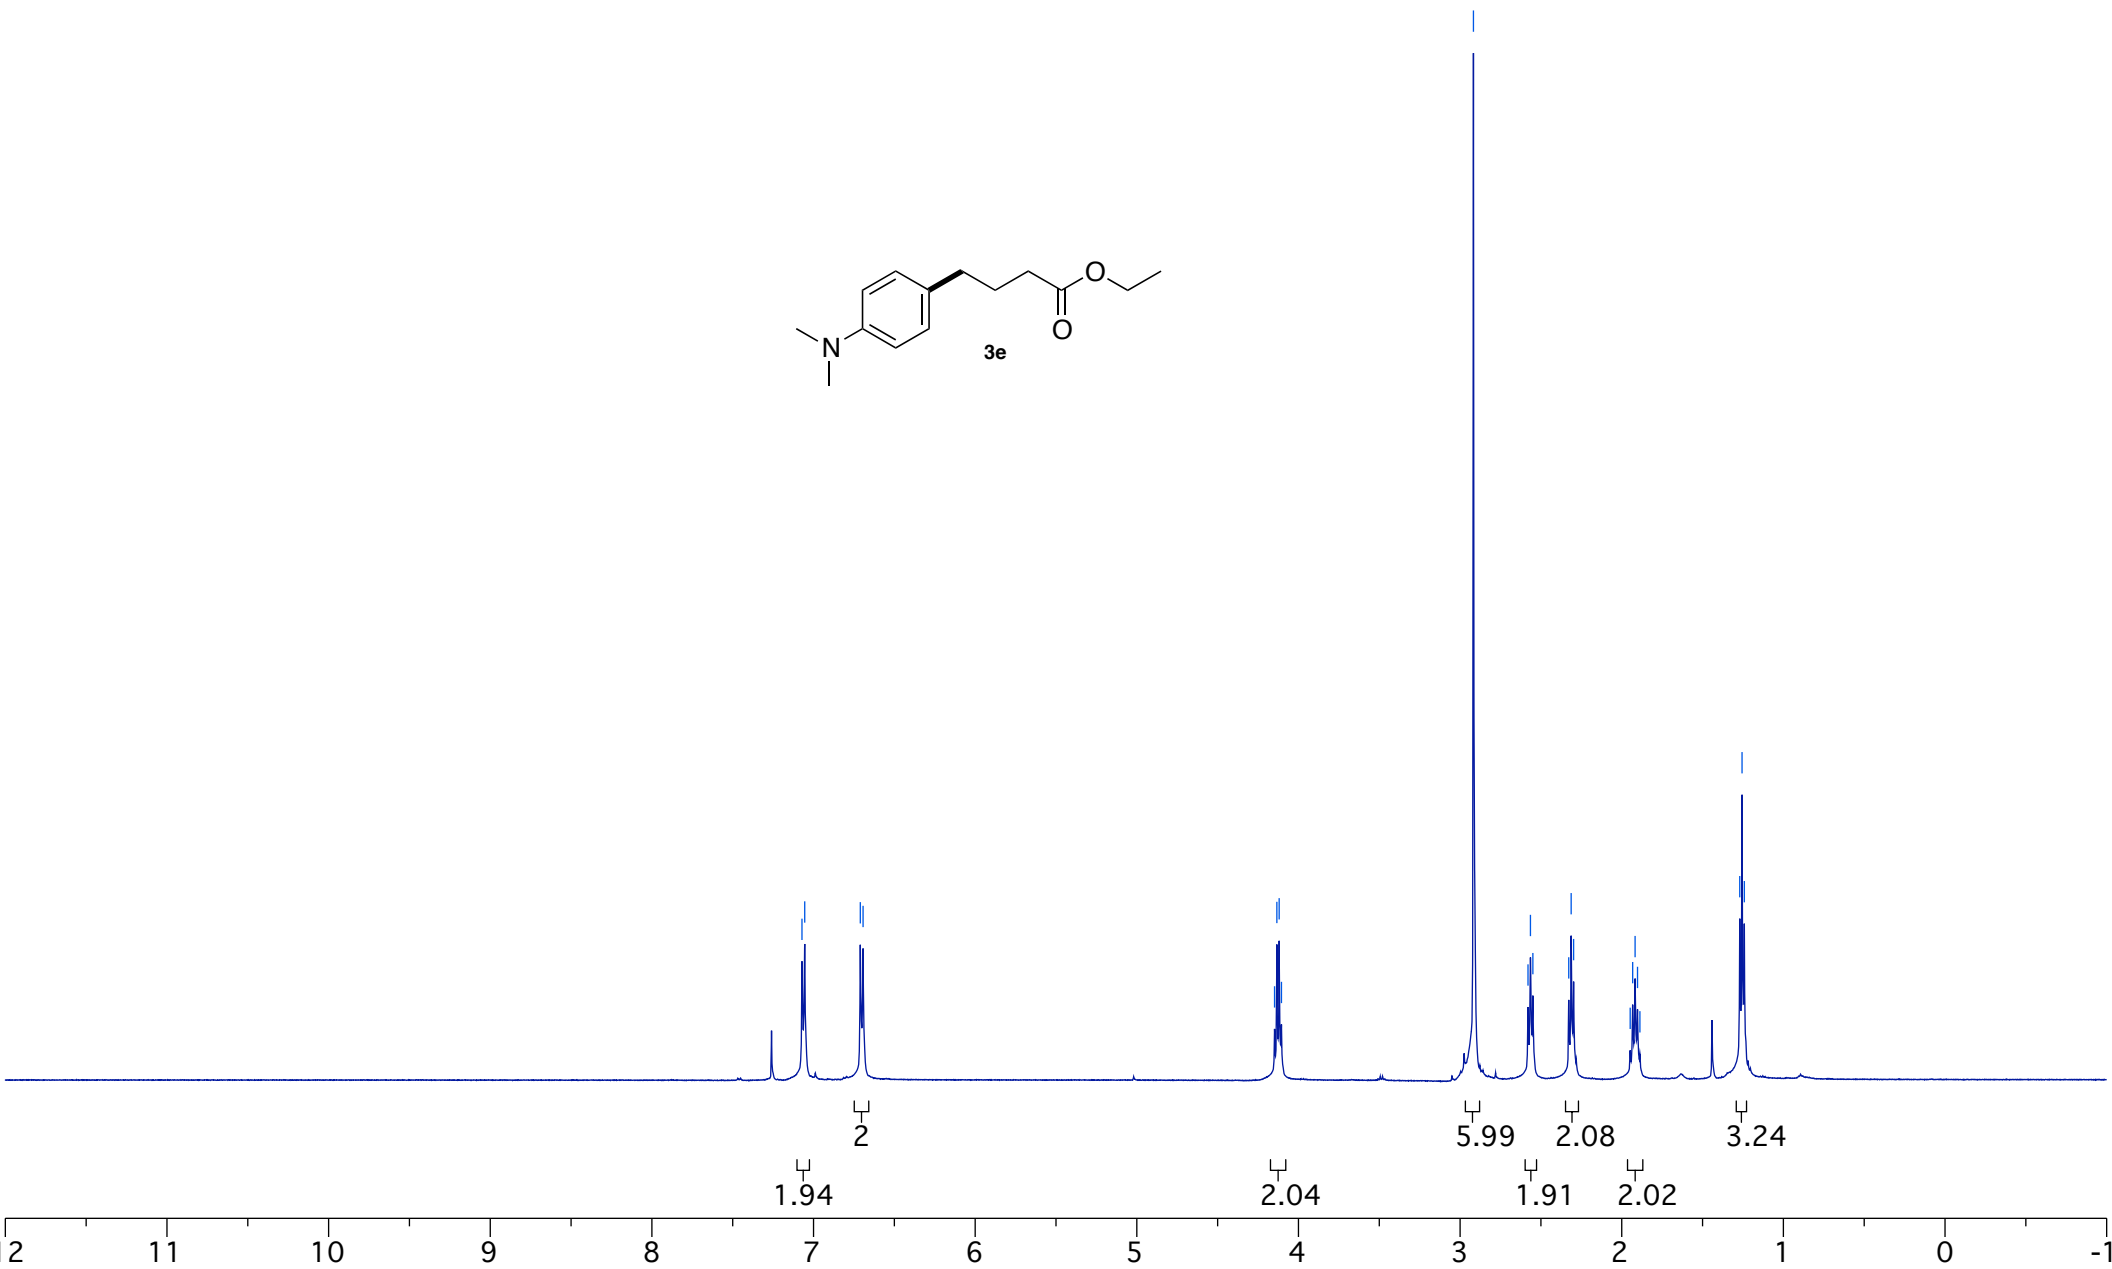

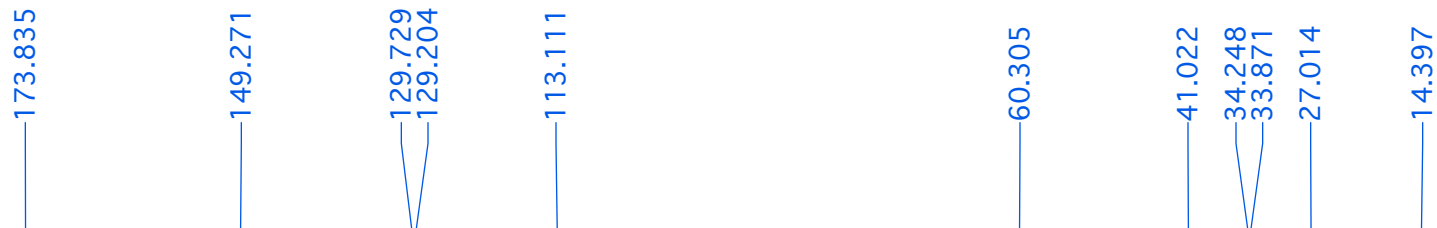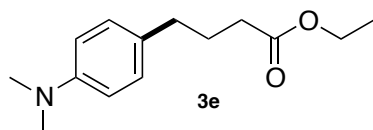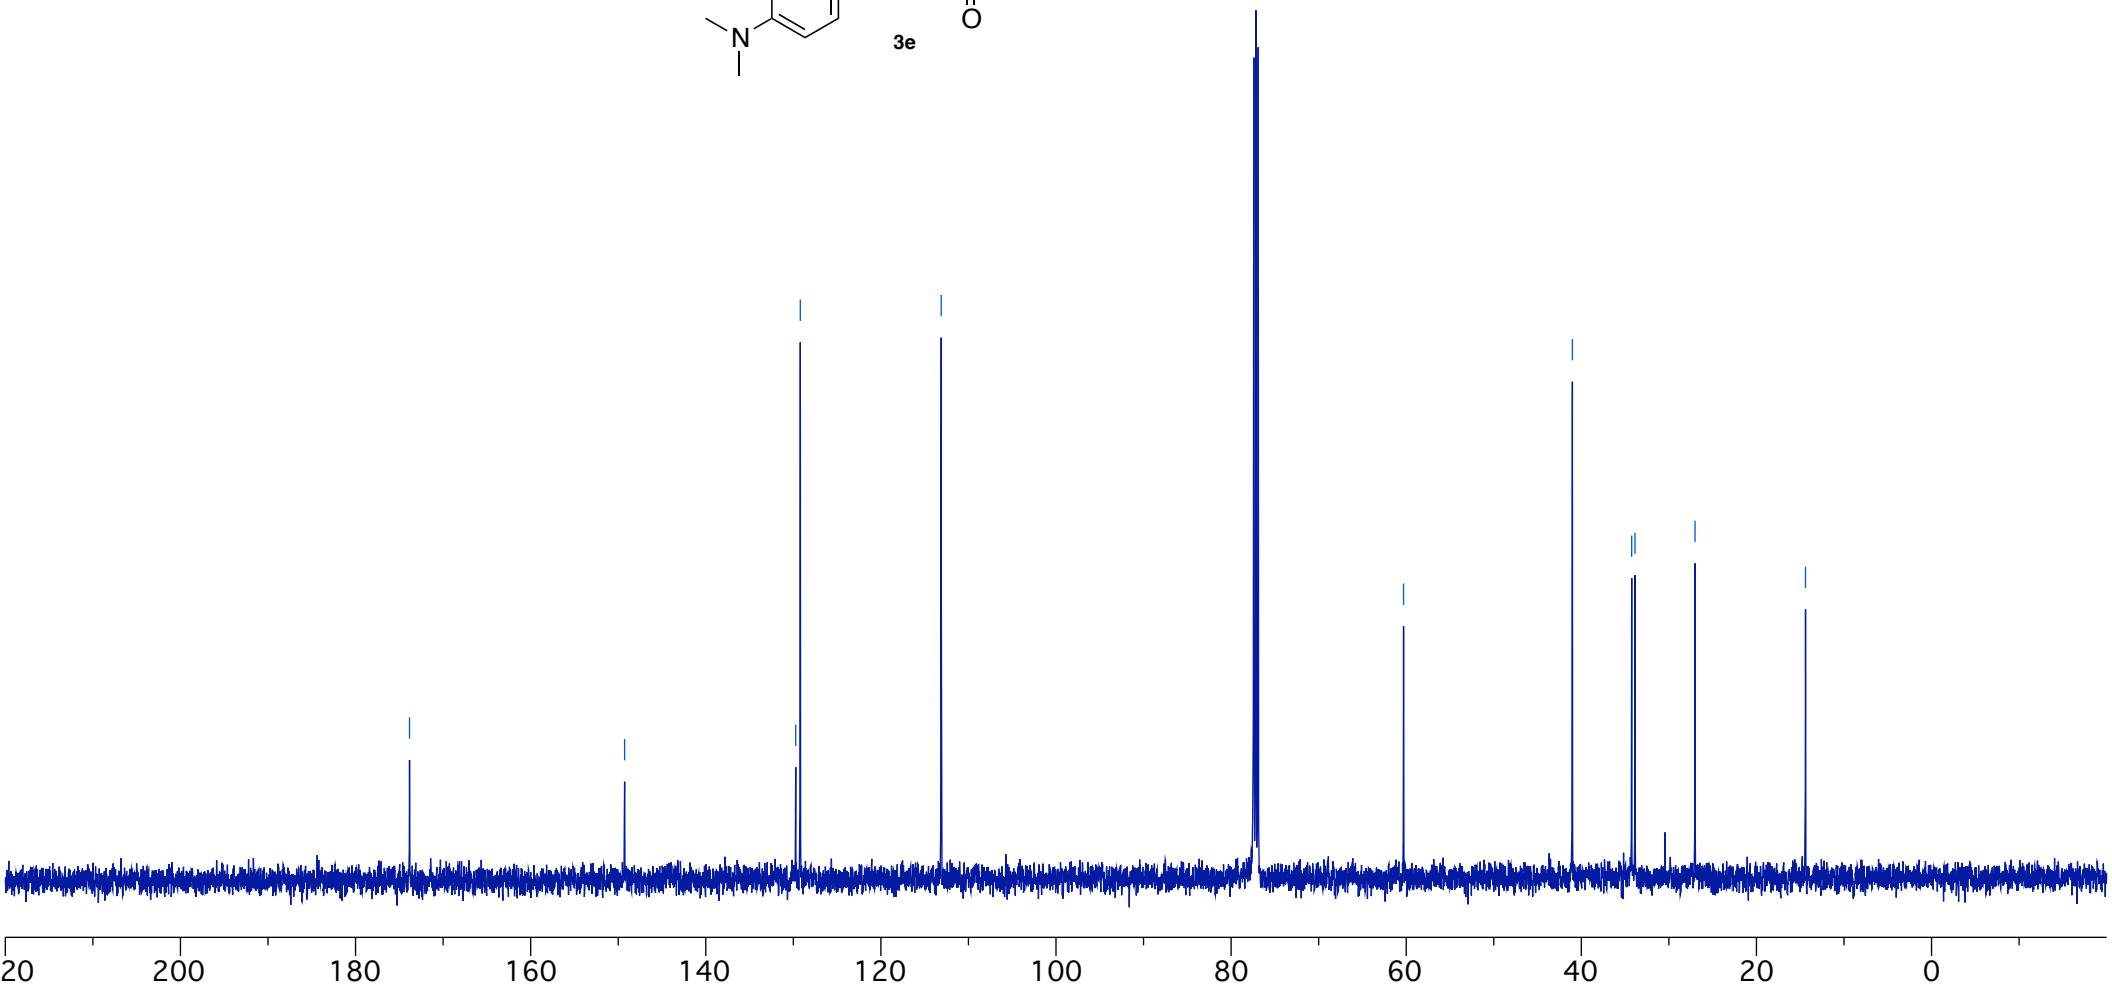



S-57

7.151  
7.137  
7.130  
7.106  
7.095

4.164  
4.150  
4.135  
4.121

2.664  
2.648  
2.633  
2.387  
2.373  
2.358  
2.322  
1.947  
1.932  
1.917  
1.901  
1.886  
1.283  
1.268  
1.254

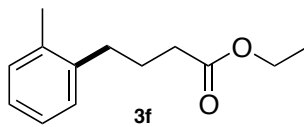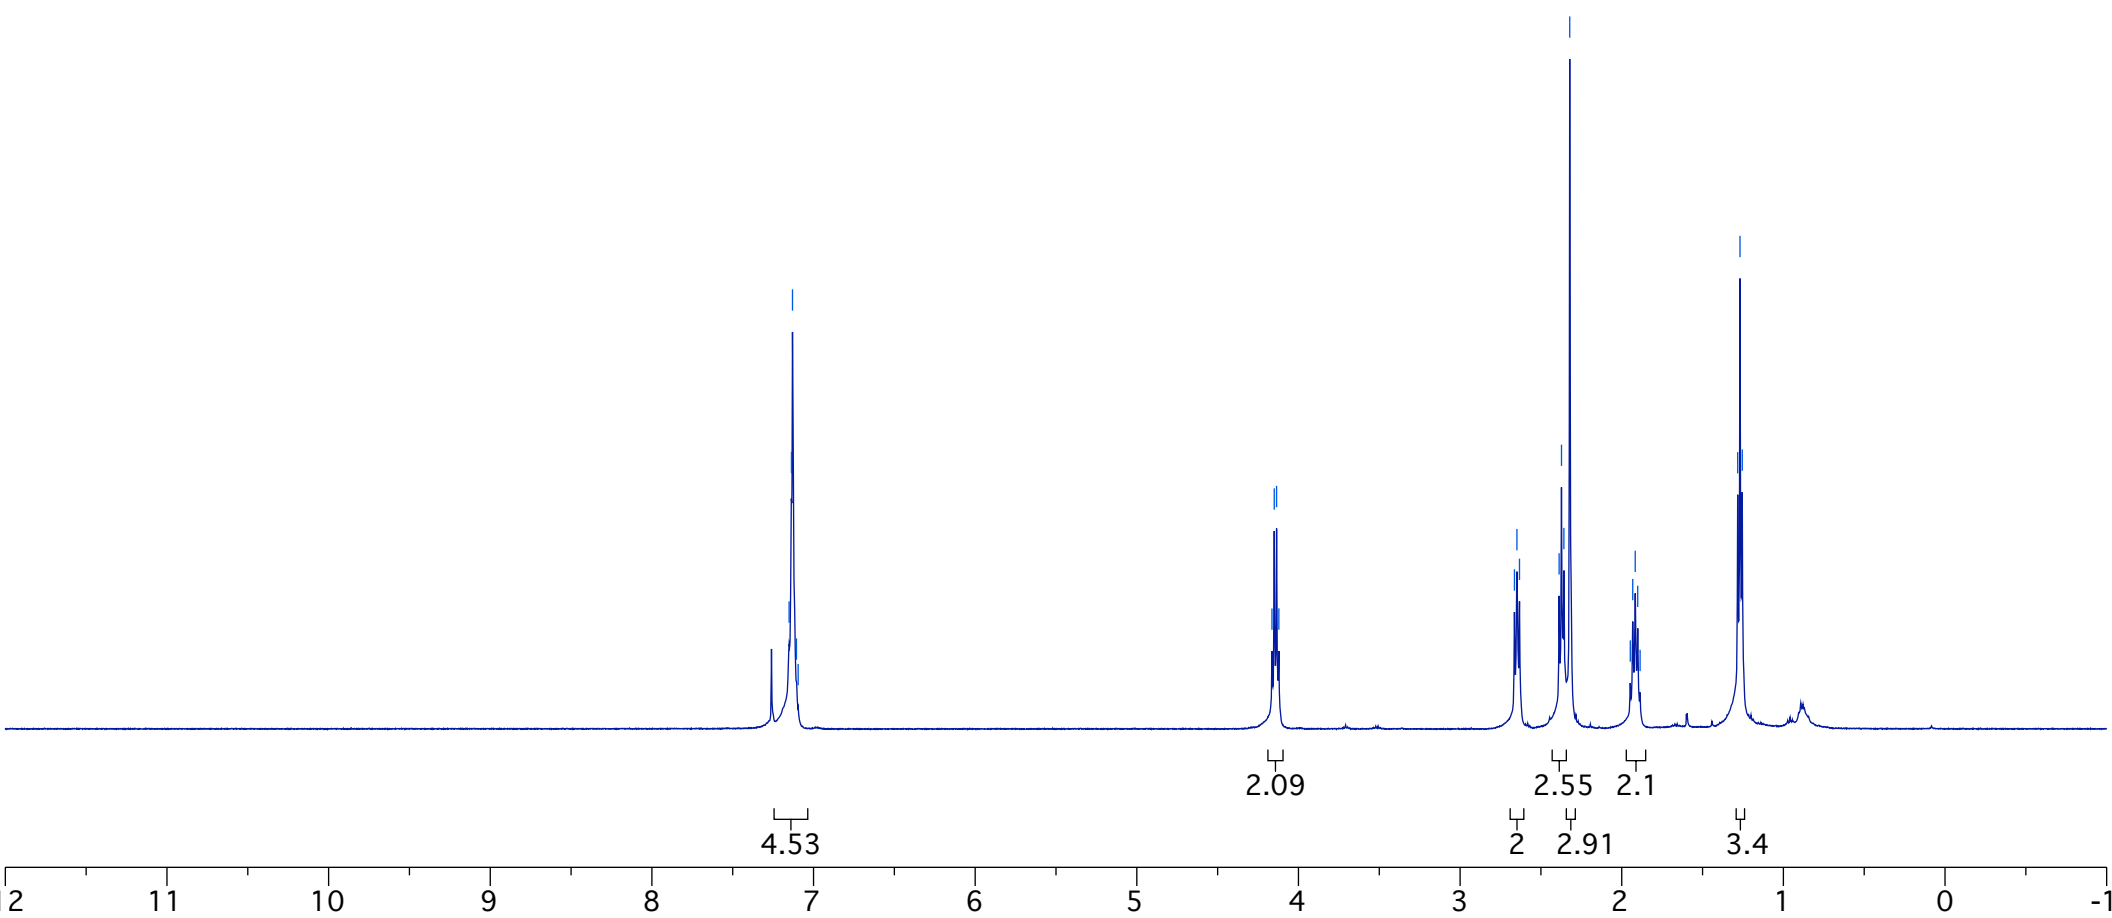

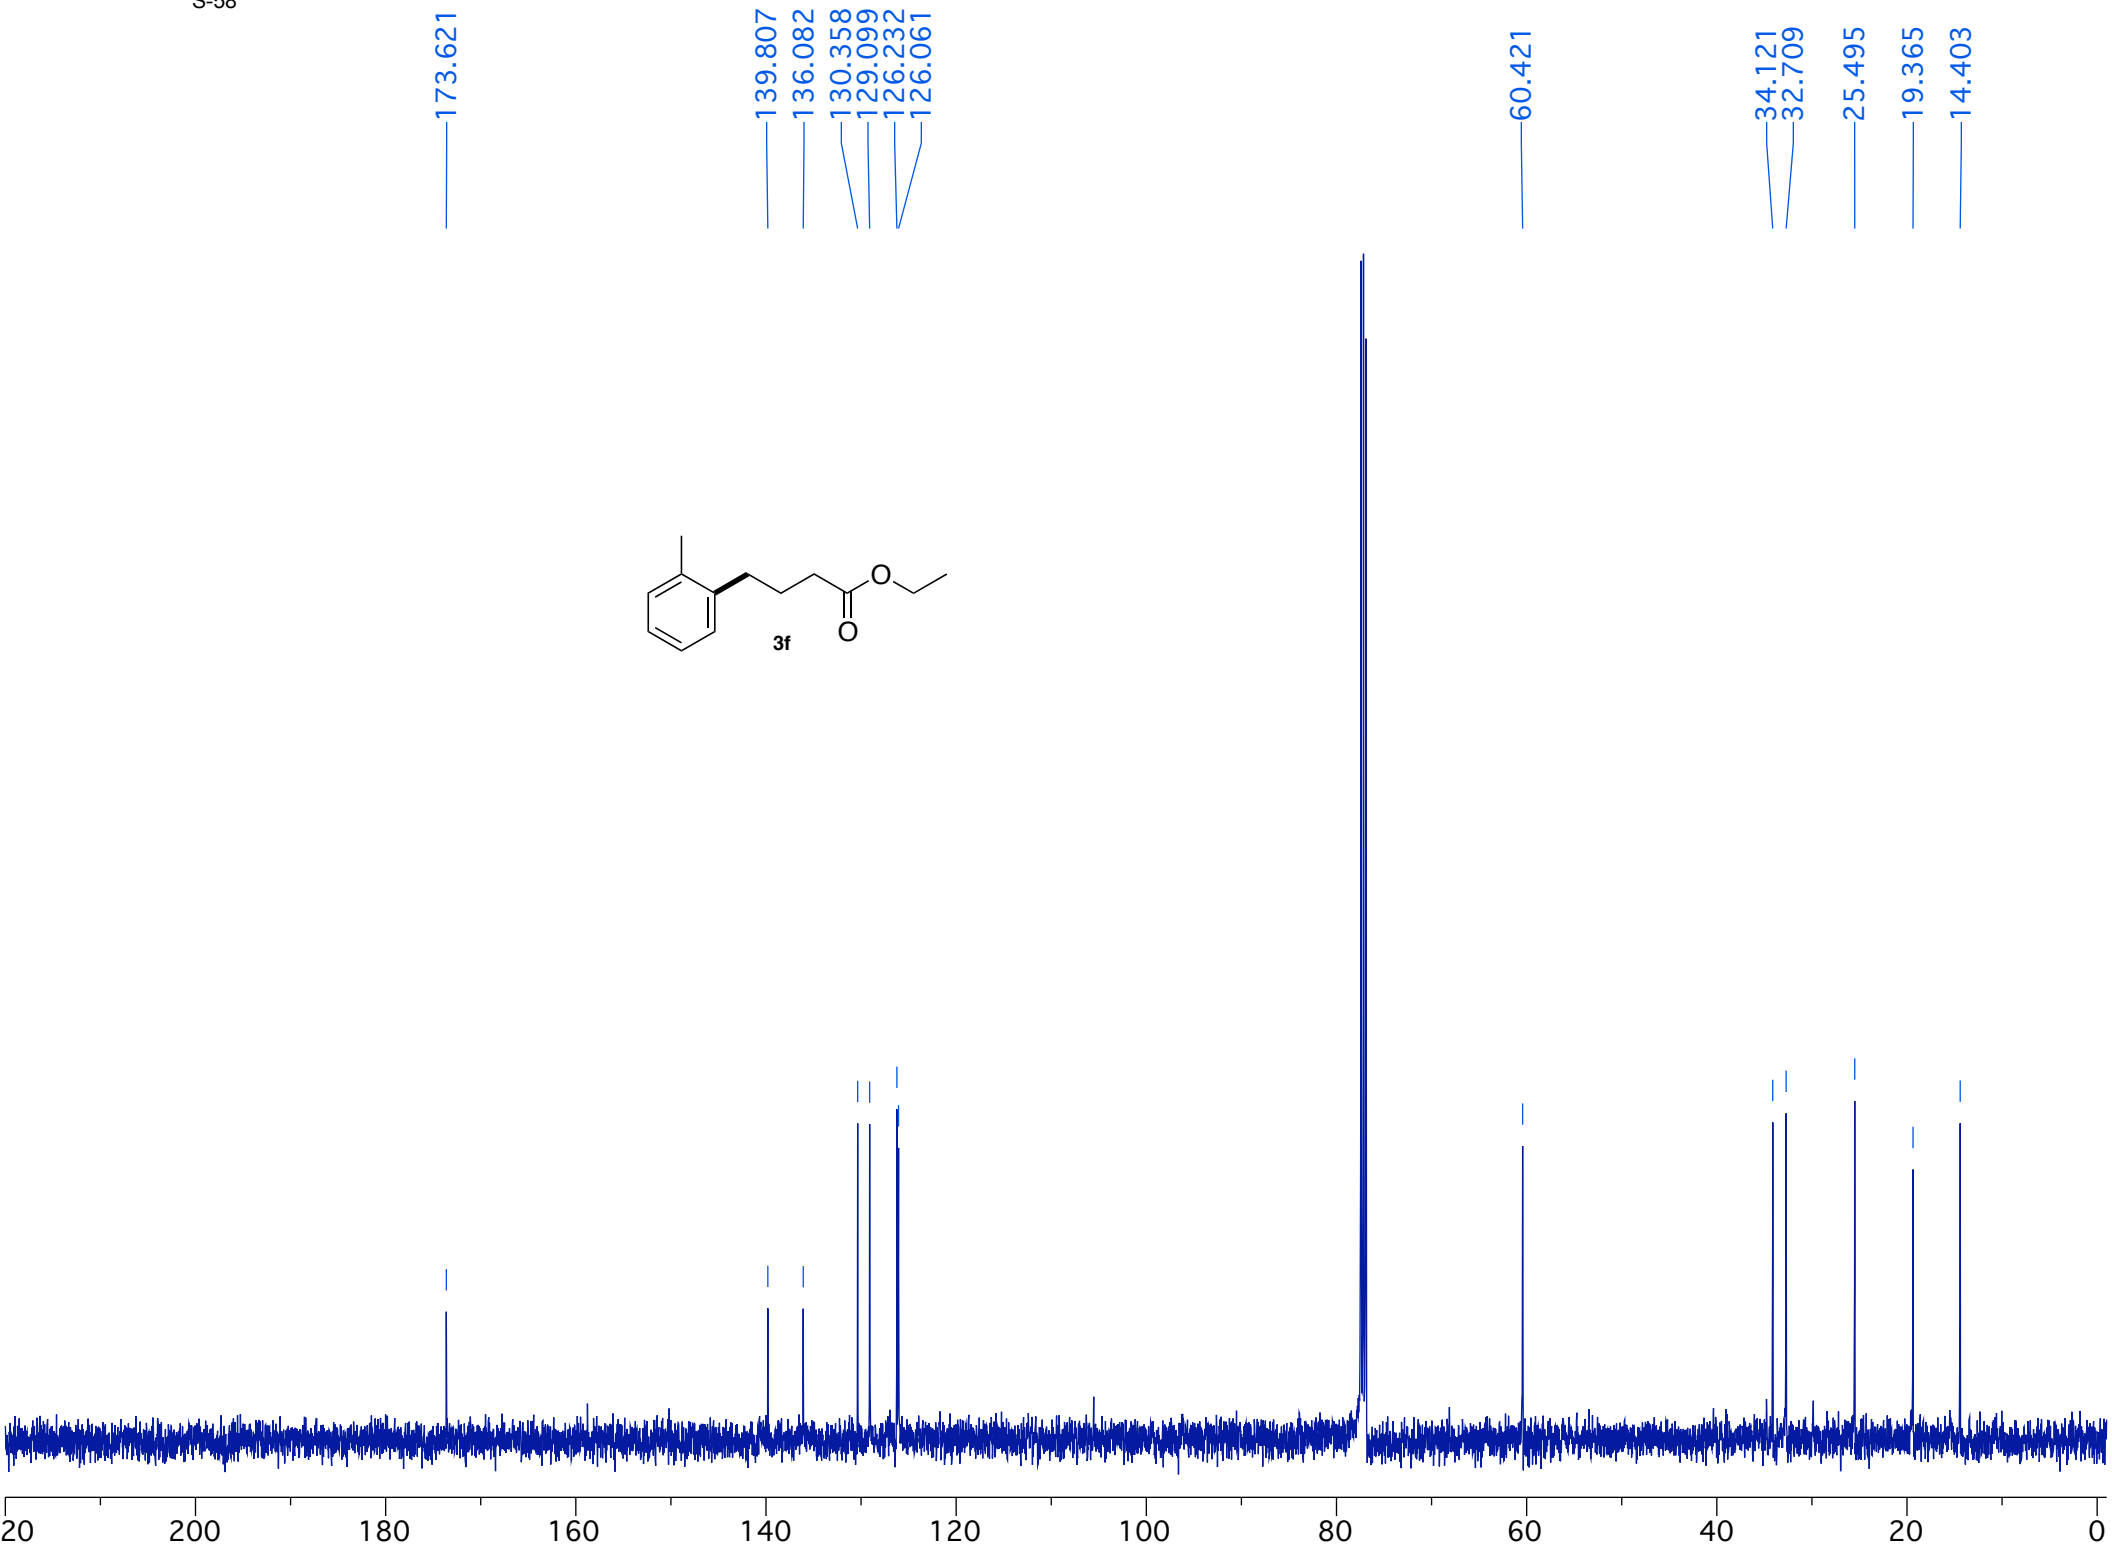

S-59

7.338  
7.324  
7.309  
7.242  
7.227  
7.219  
7.204

2.637  
2.622  
2.610  
2.601  
2.596  
2.587  
2.575  
2.560  
1.661  
1.648  
1.636  
1.624  
1.611  
1.377  
1.362  
1.342  
1.336  
0.956  
0.947  
0.942  
0.927

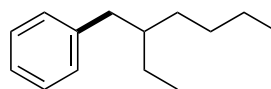

3g

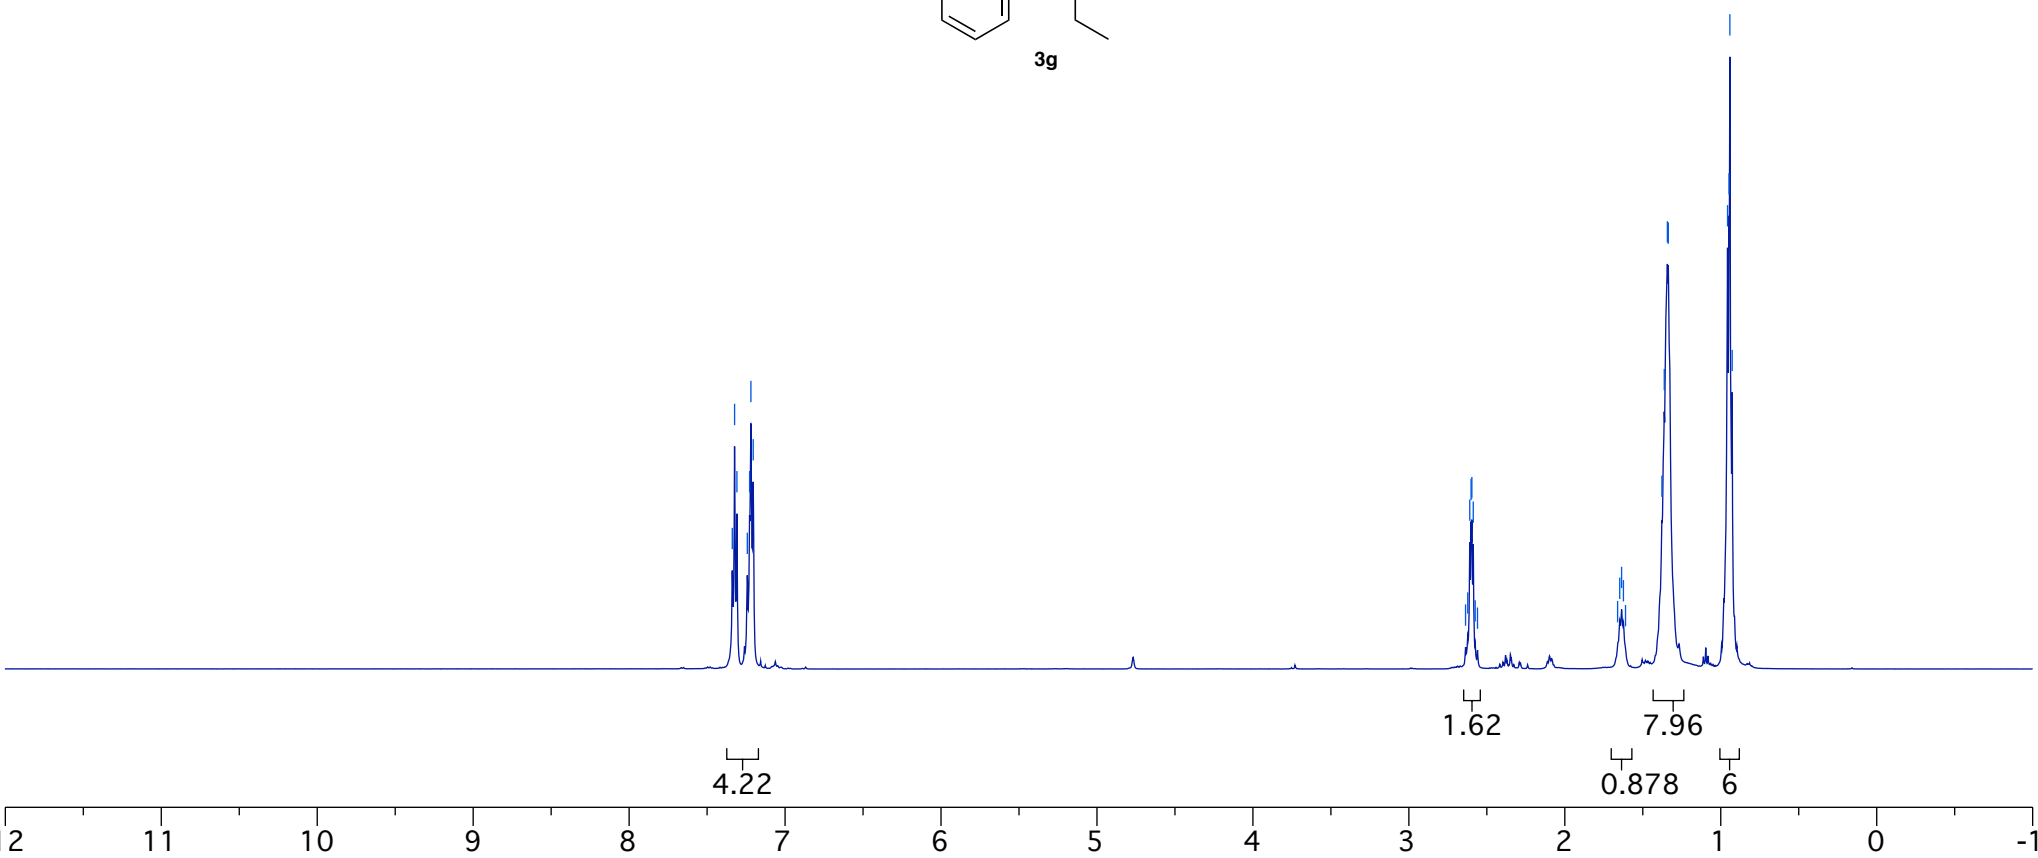

141.913

129.239

128.102

125.543

41.162

40.213

32.417

28.927

25.482

23.111

14.183

10.831

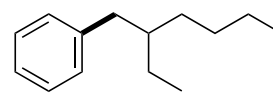

3g

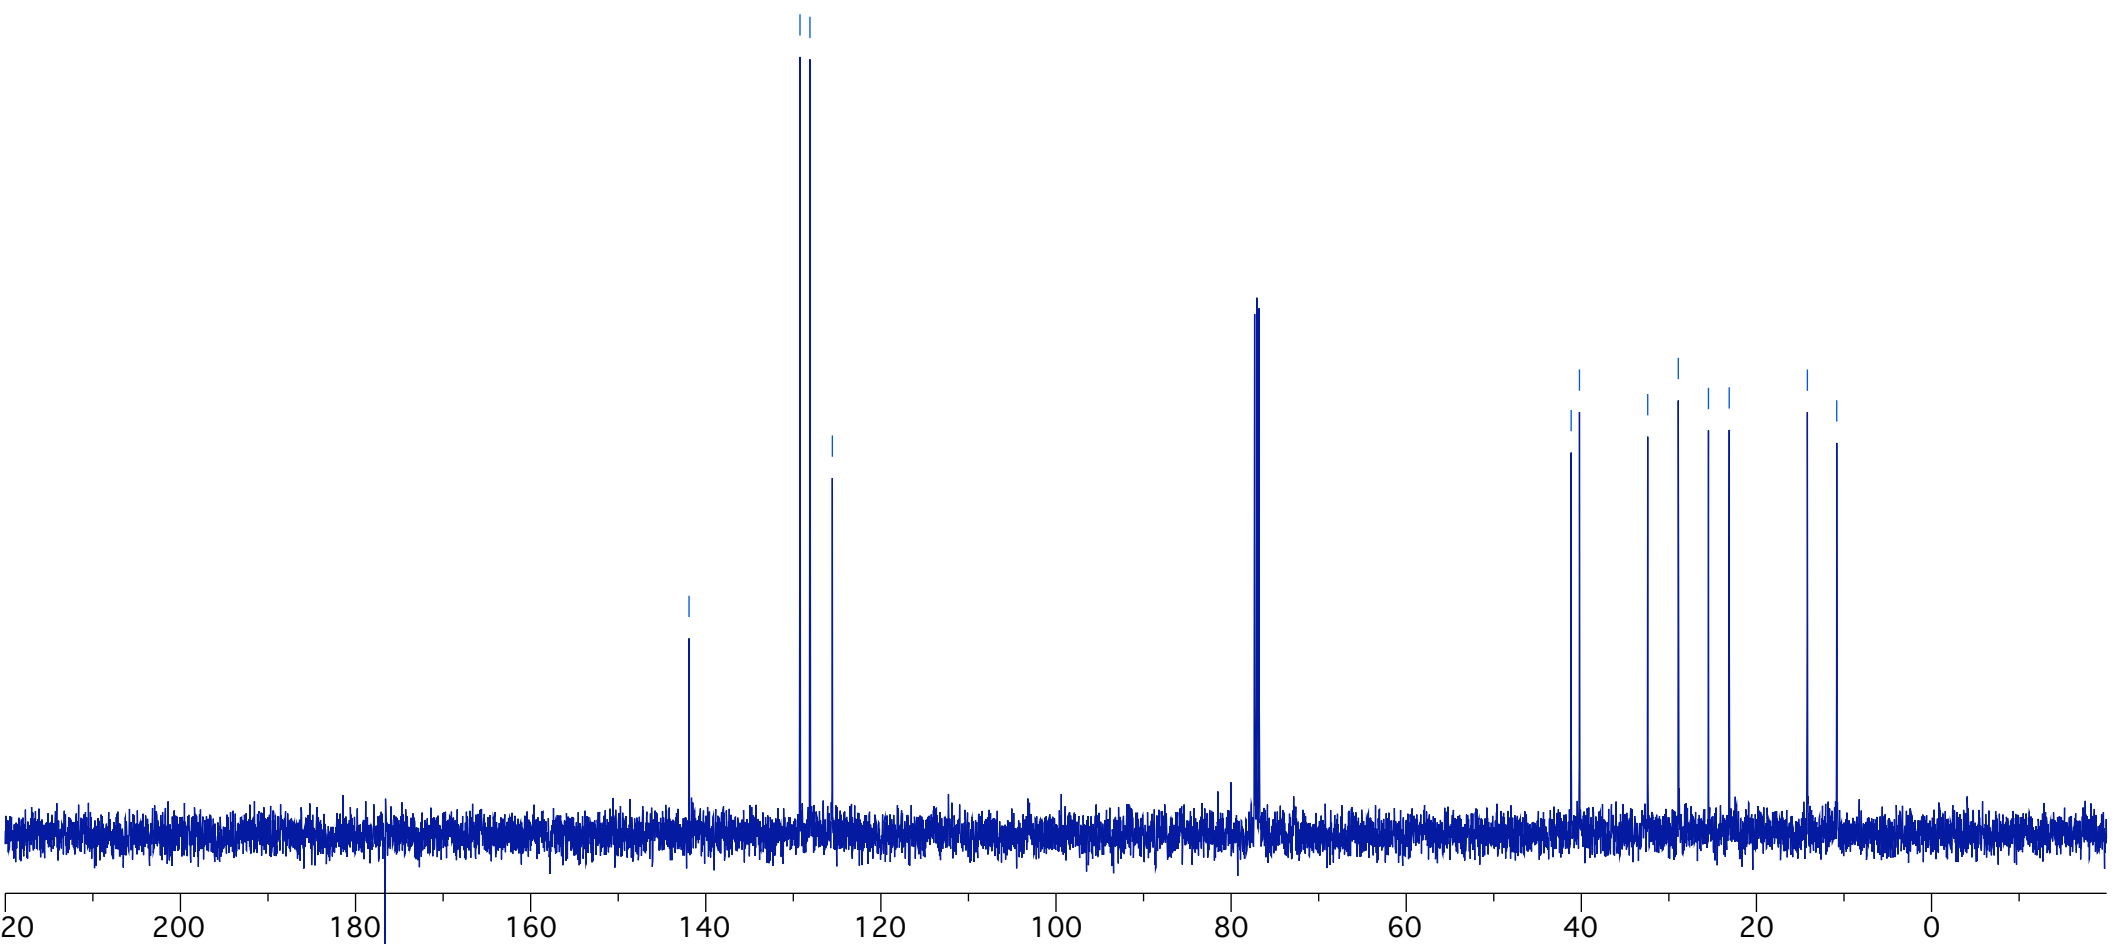

S-61

7.584  
7.568  
7.294  
7.278

4.149  
4.135  
4.121  
4.106

2.727  
2.712  
2.696  
2.333  
2.318  
2.304  
1.988  
1.973  
1.957  
1.942  
1.927

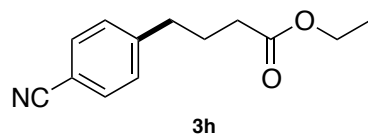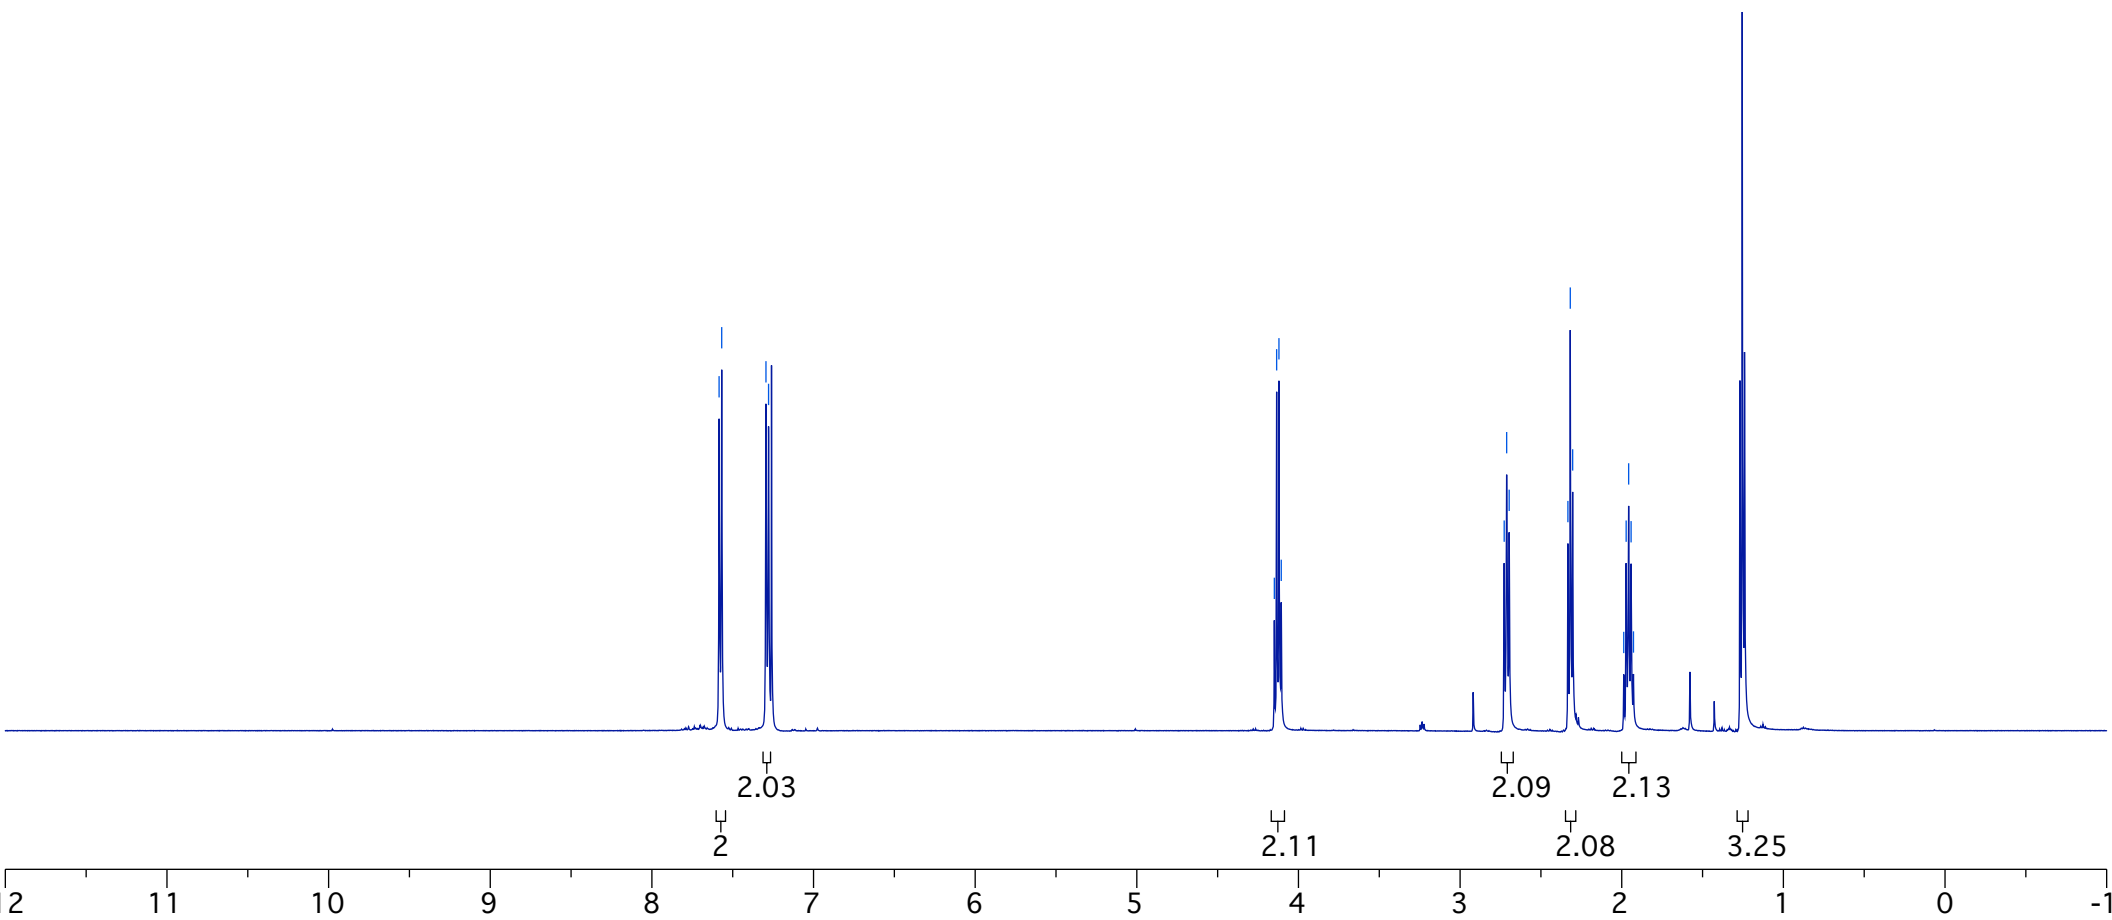

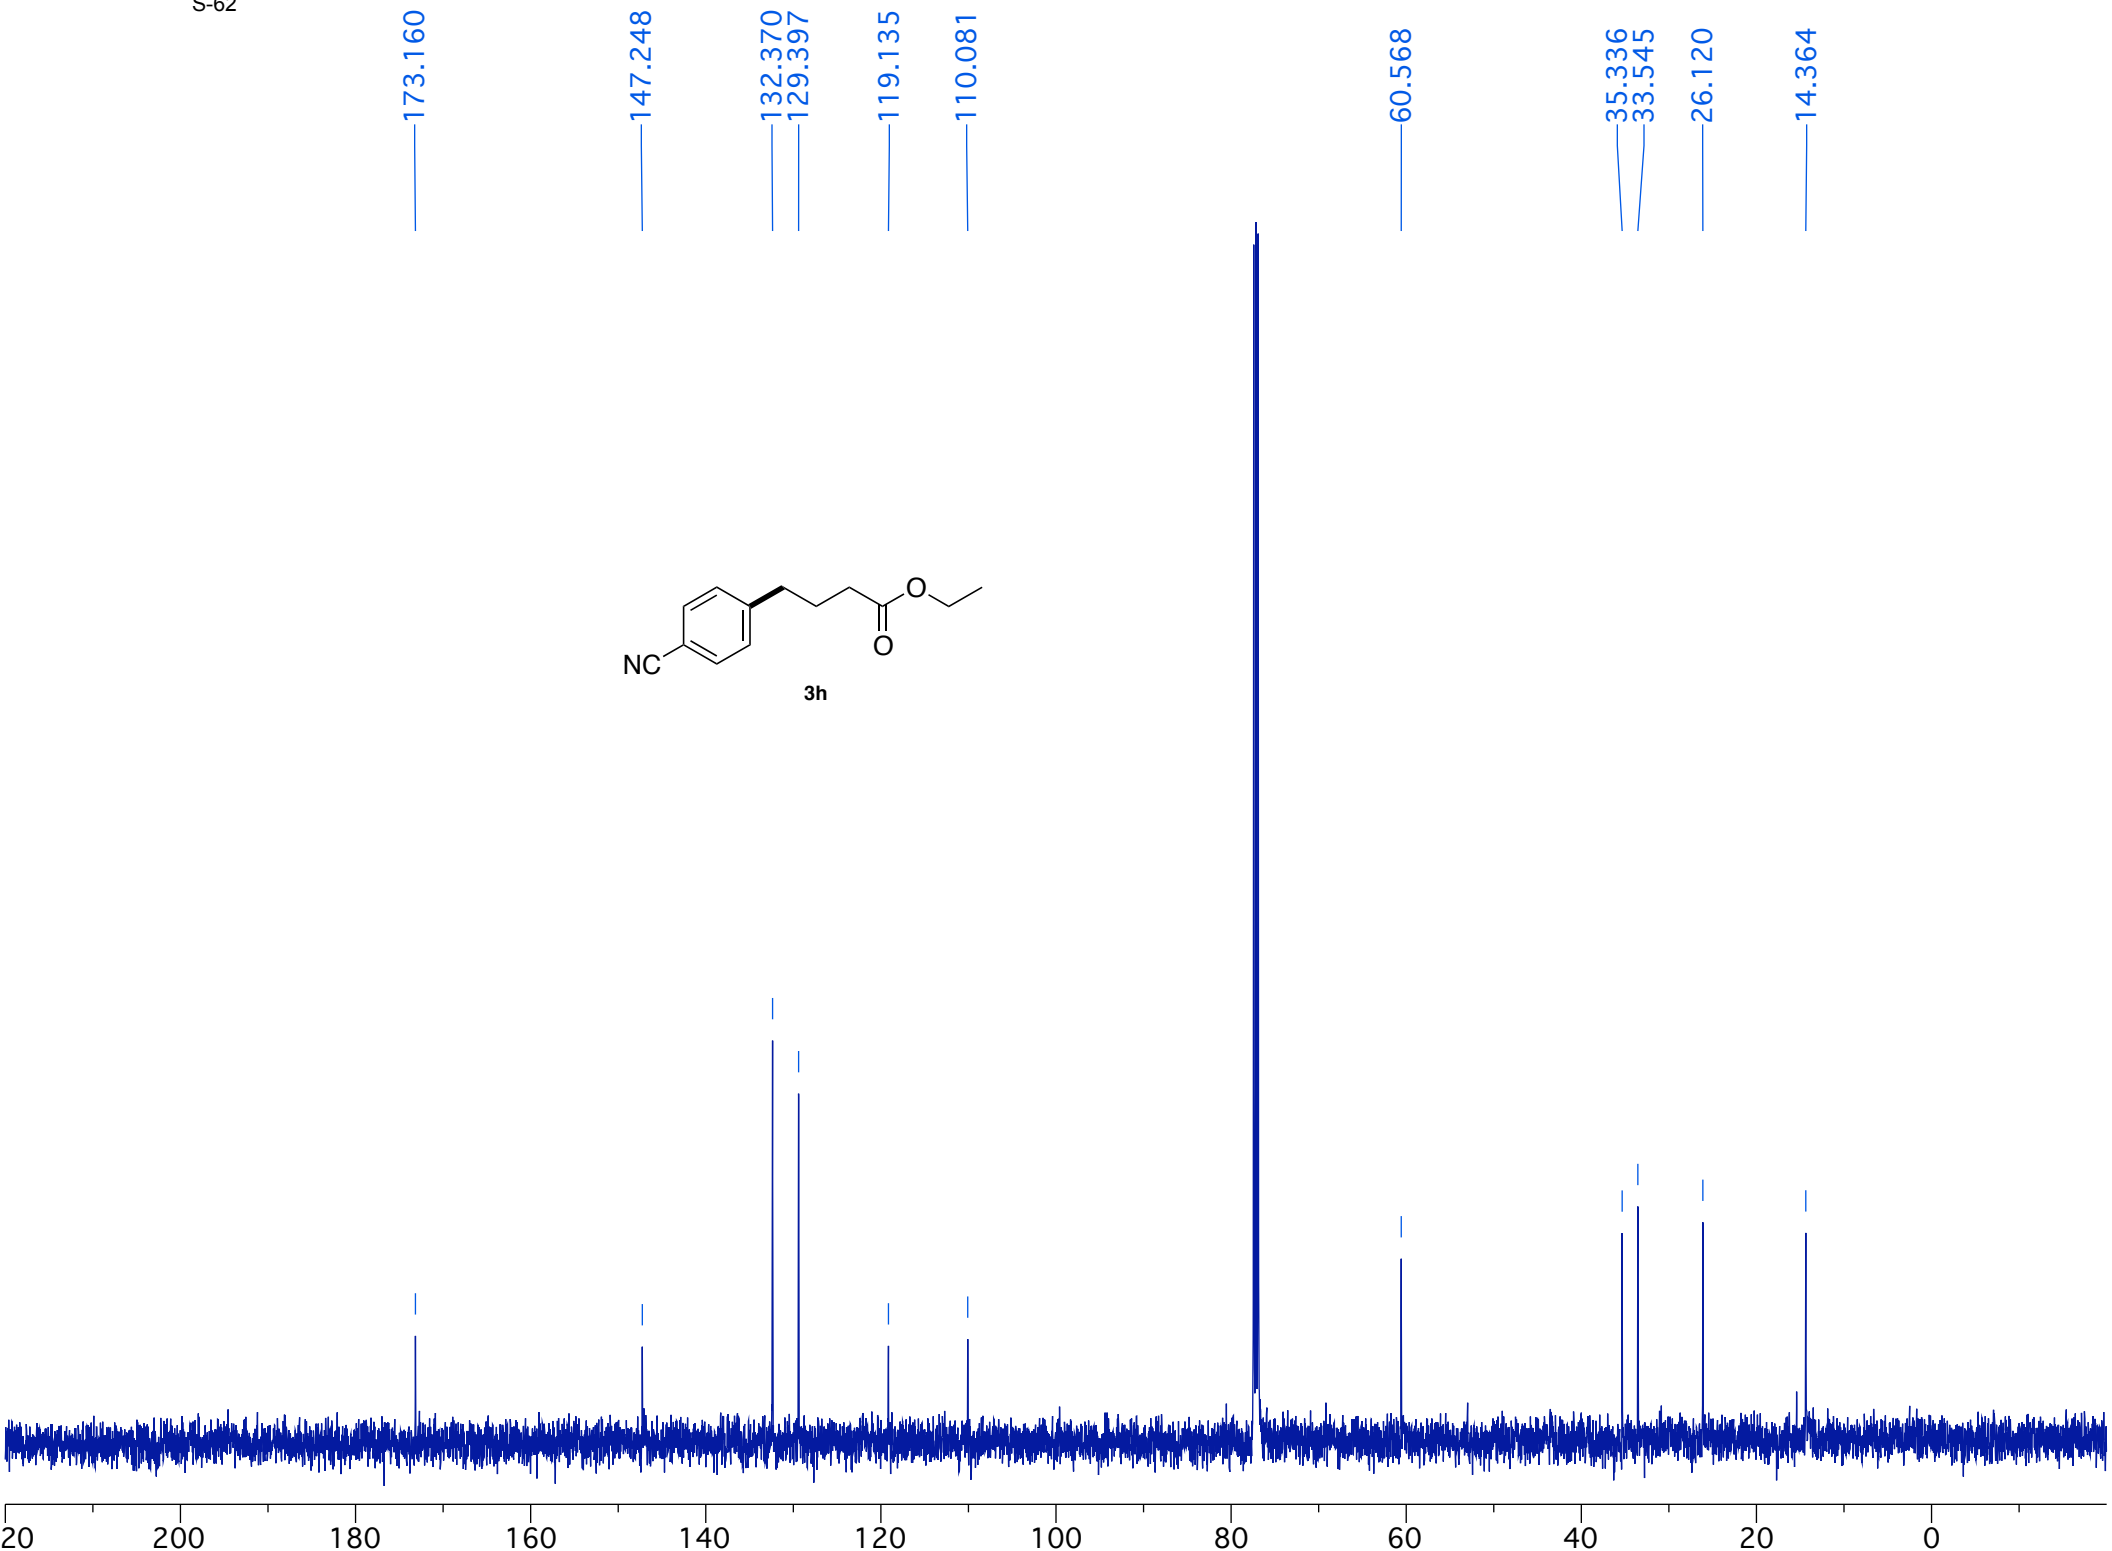

7.519  
7.503  
7.276  
7.2604.127  
4.113  
4.099  
4.0842.703  
2.688  
2.672  
2.313  
2.298  
2.284  
1.977  
1.963  
1.948  
1.932  
1.917  
1.242  
1.228  
1.214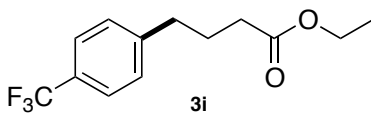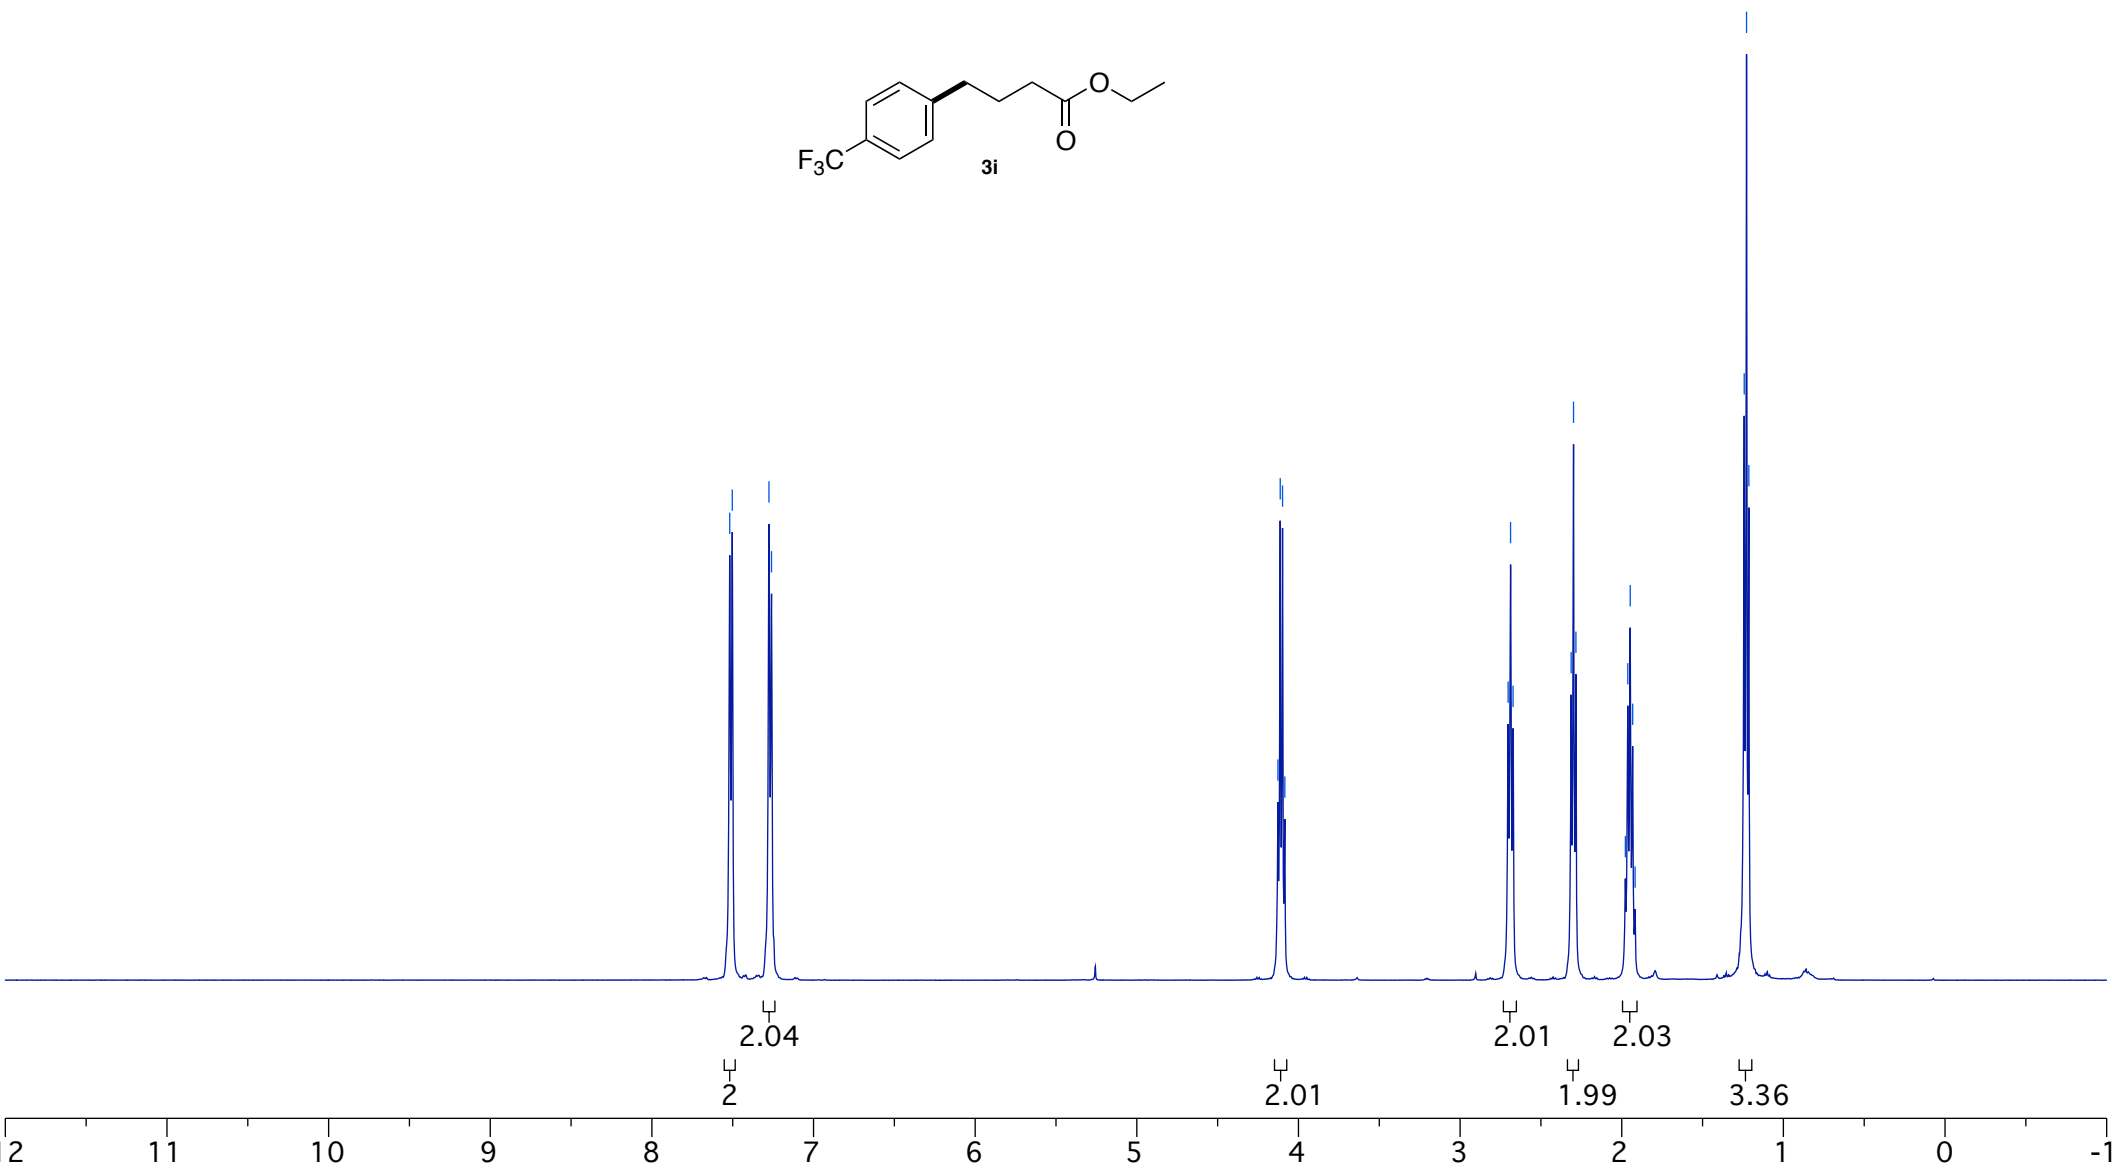

S-64

173.248

145.717

128.887

128.611

128.350

125.526

125.433

125.401

125.372

125.345

60.434

35.001

33.557

26.307

14.268

DAE4P130 21-38

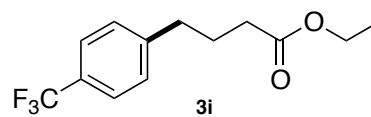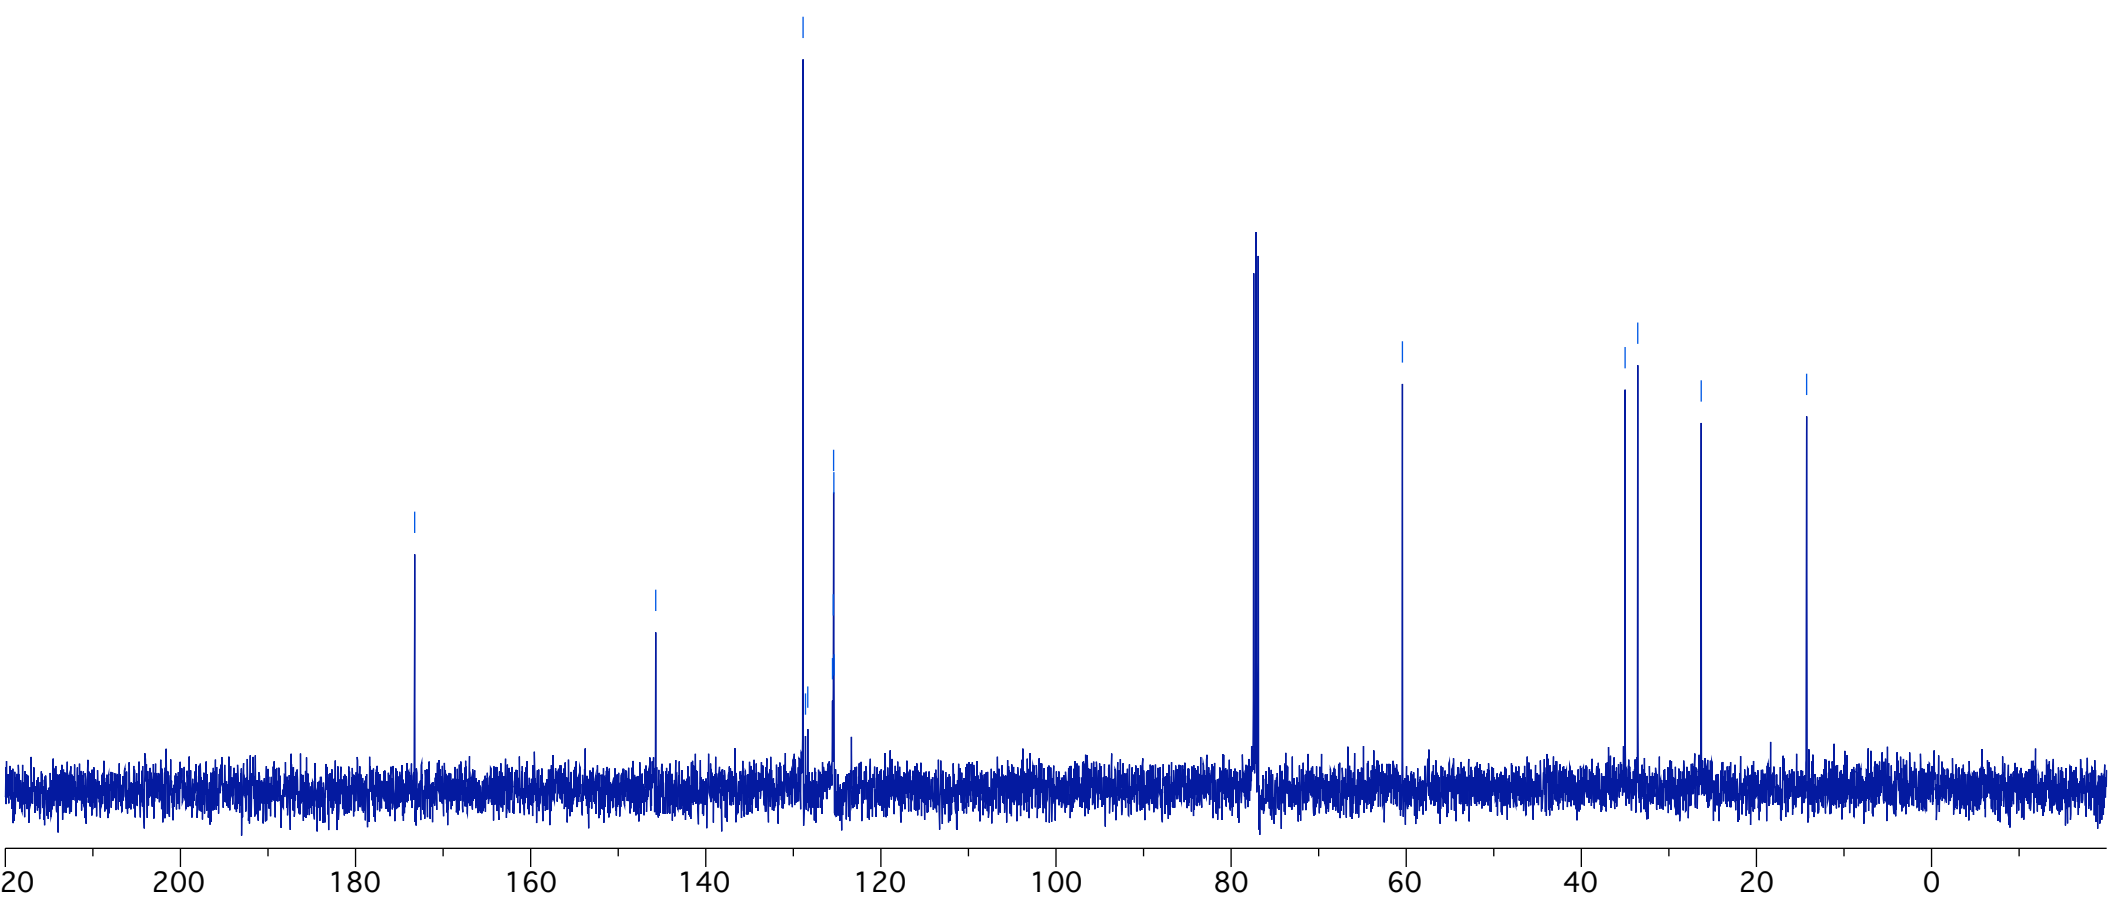



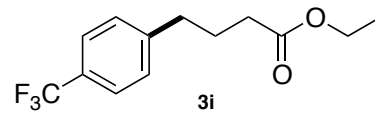

0.492

160 140 120 100 80 60 40 20 0 -20

7.260  
7.125  
6.981  
6.9644.132  
4.1172.623  
2.319  
2.304  
2.289  
1.9271.268  
1.254  
1.239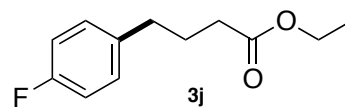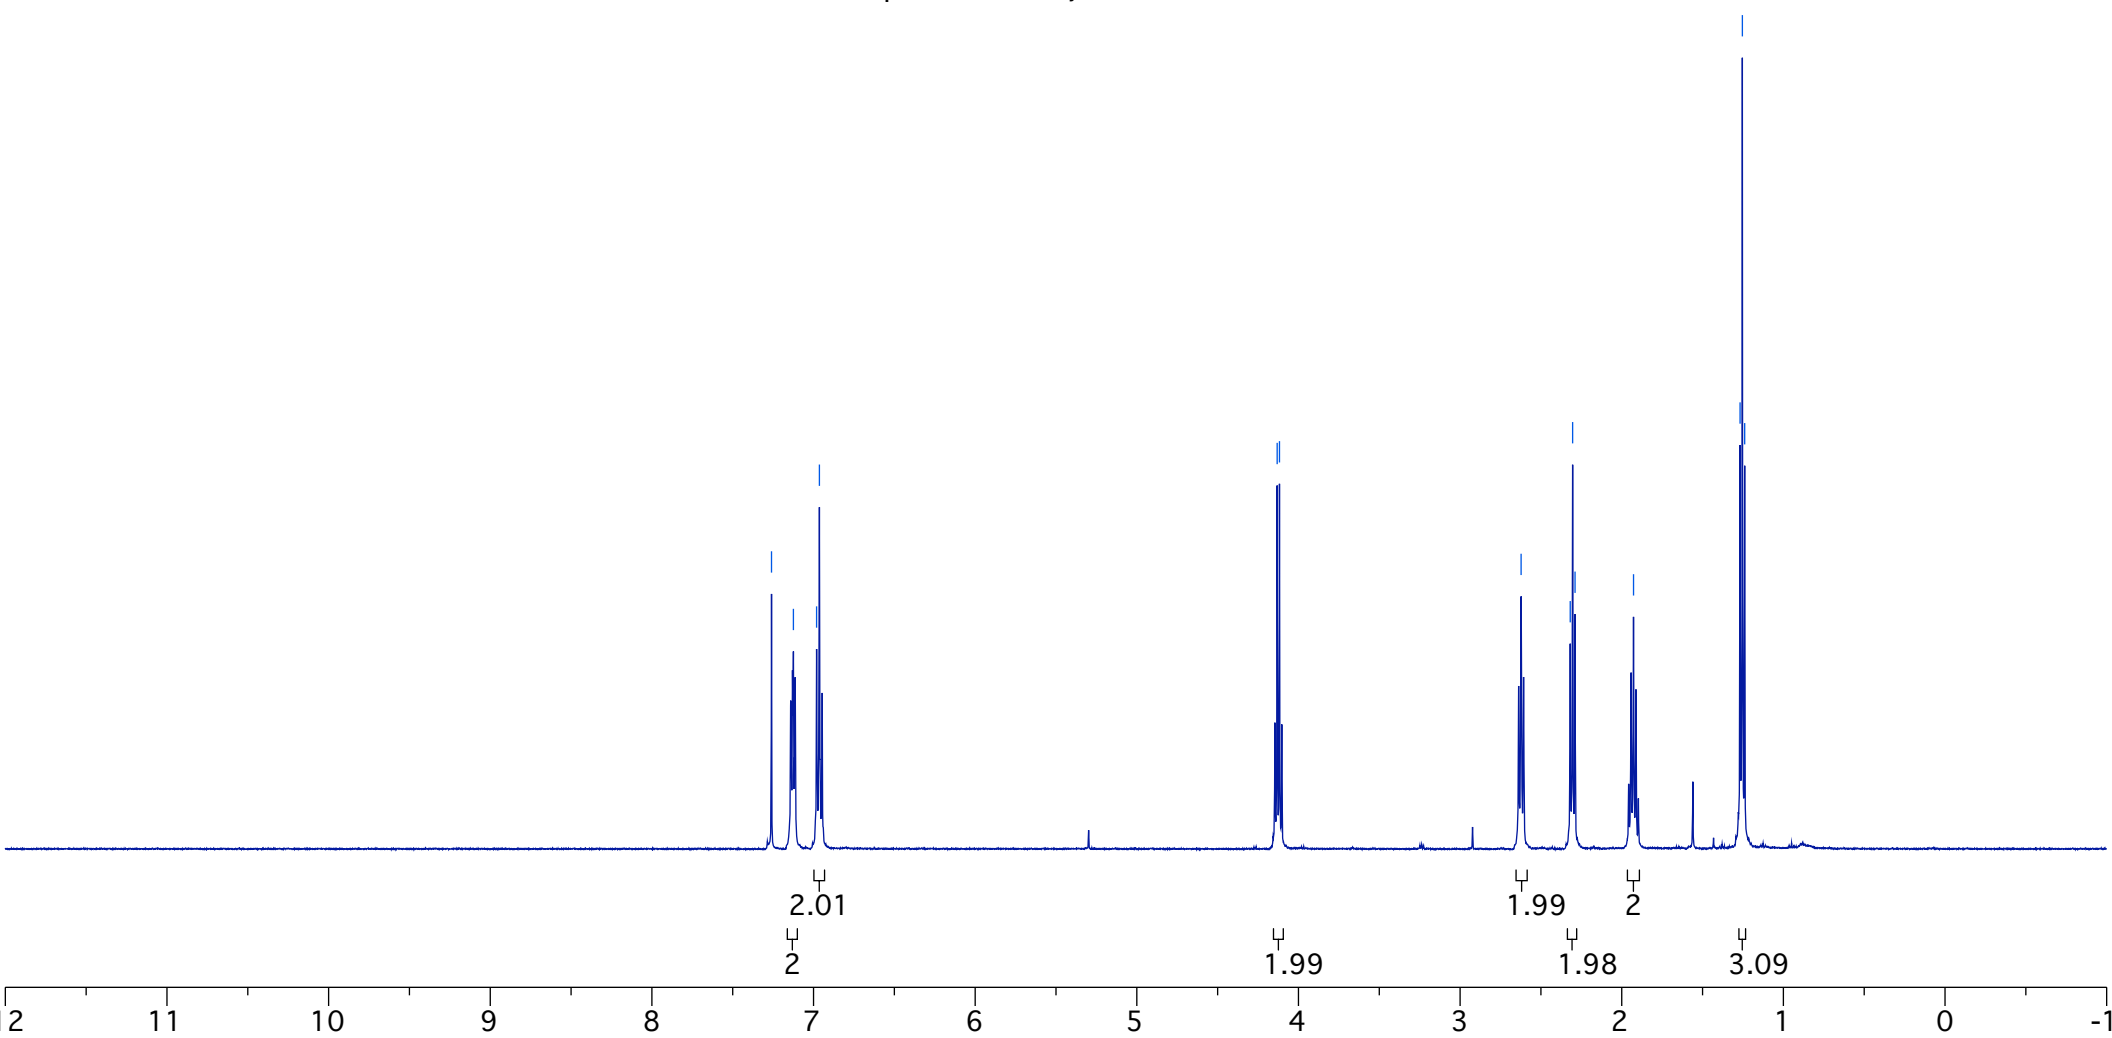

S-67

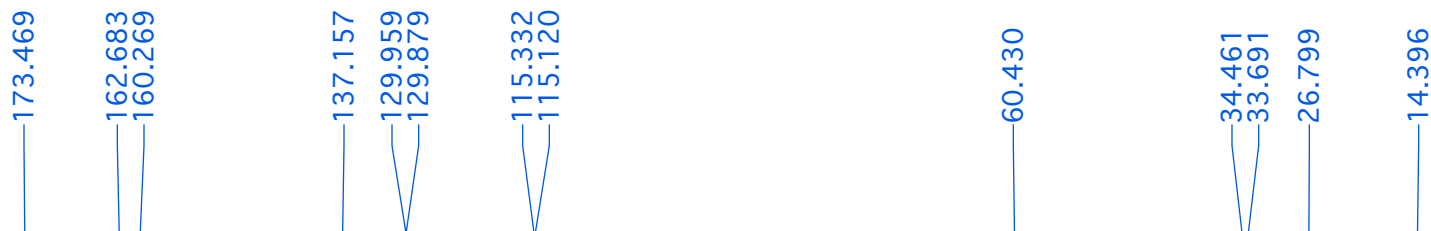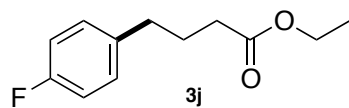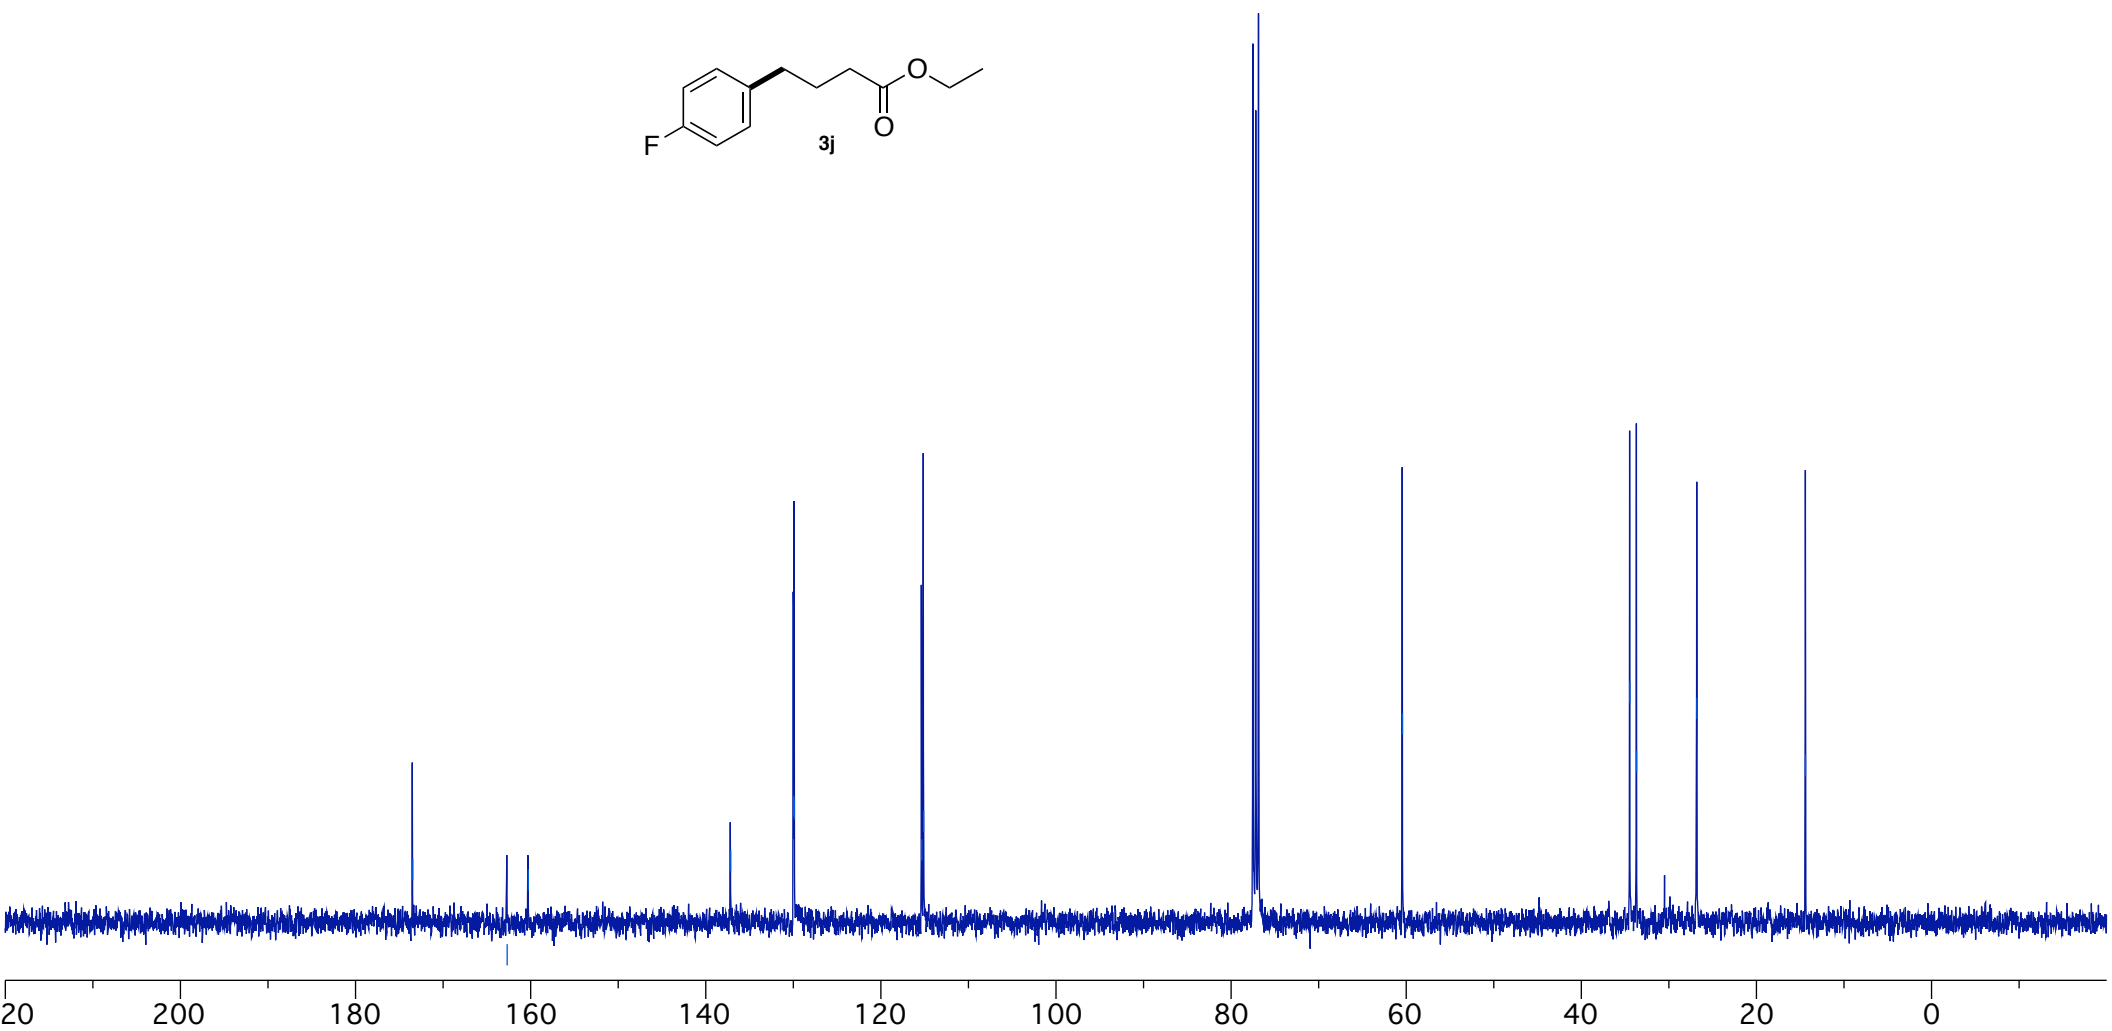

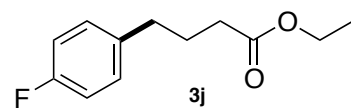

117.988  
118.012  
118.025  
118.037  
118.047  
118.062

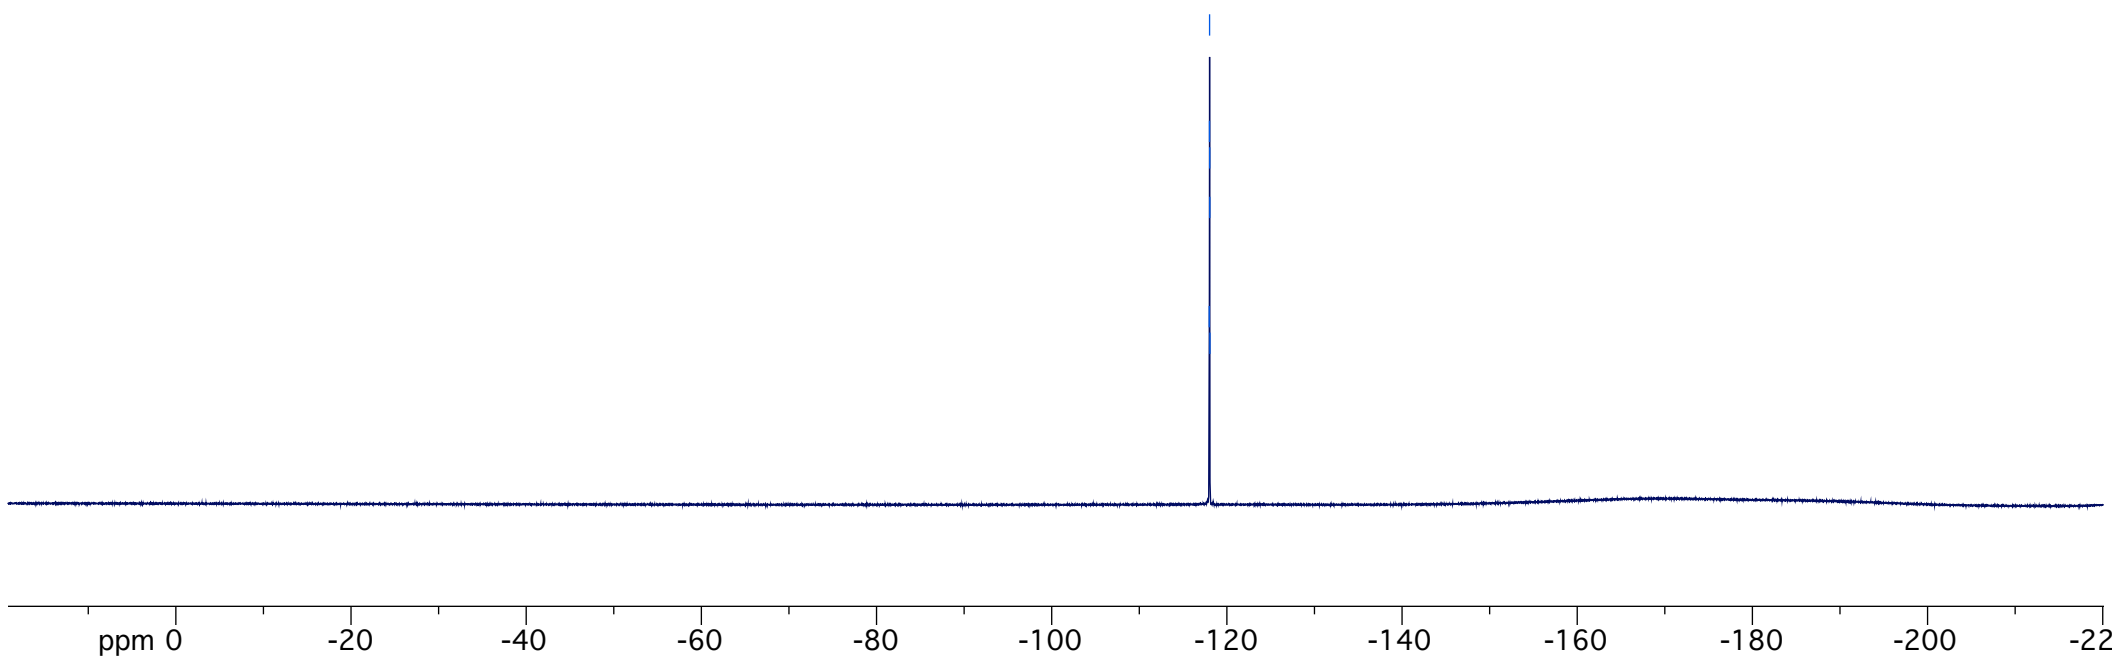

S-69

7.290  
7.274  
7.260  
7.194  
7.180  
7.165

4.560

3.157  
3.147

2.652  
2.637  
2.621

1.837  
1.822  
1.792  
1.778  
1.445

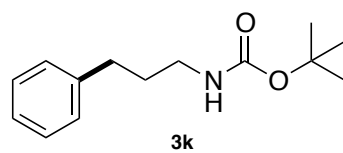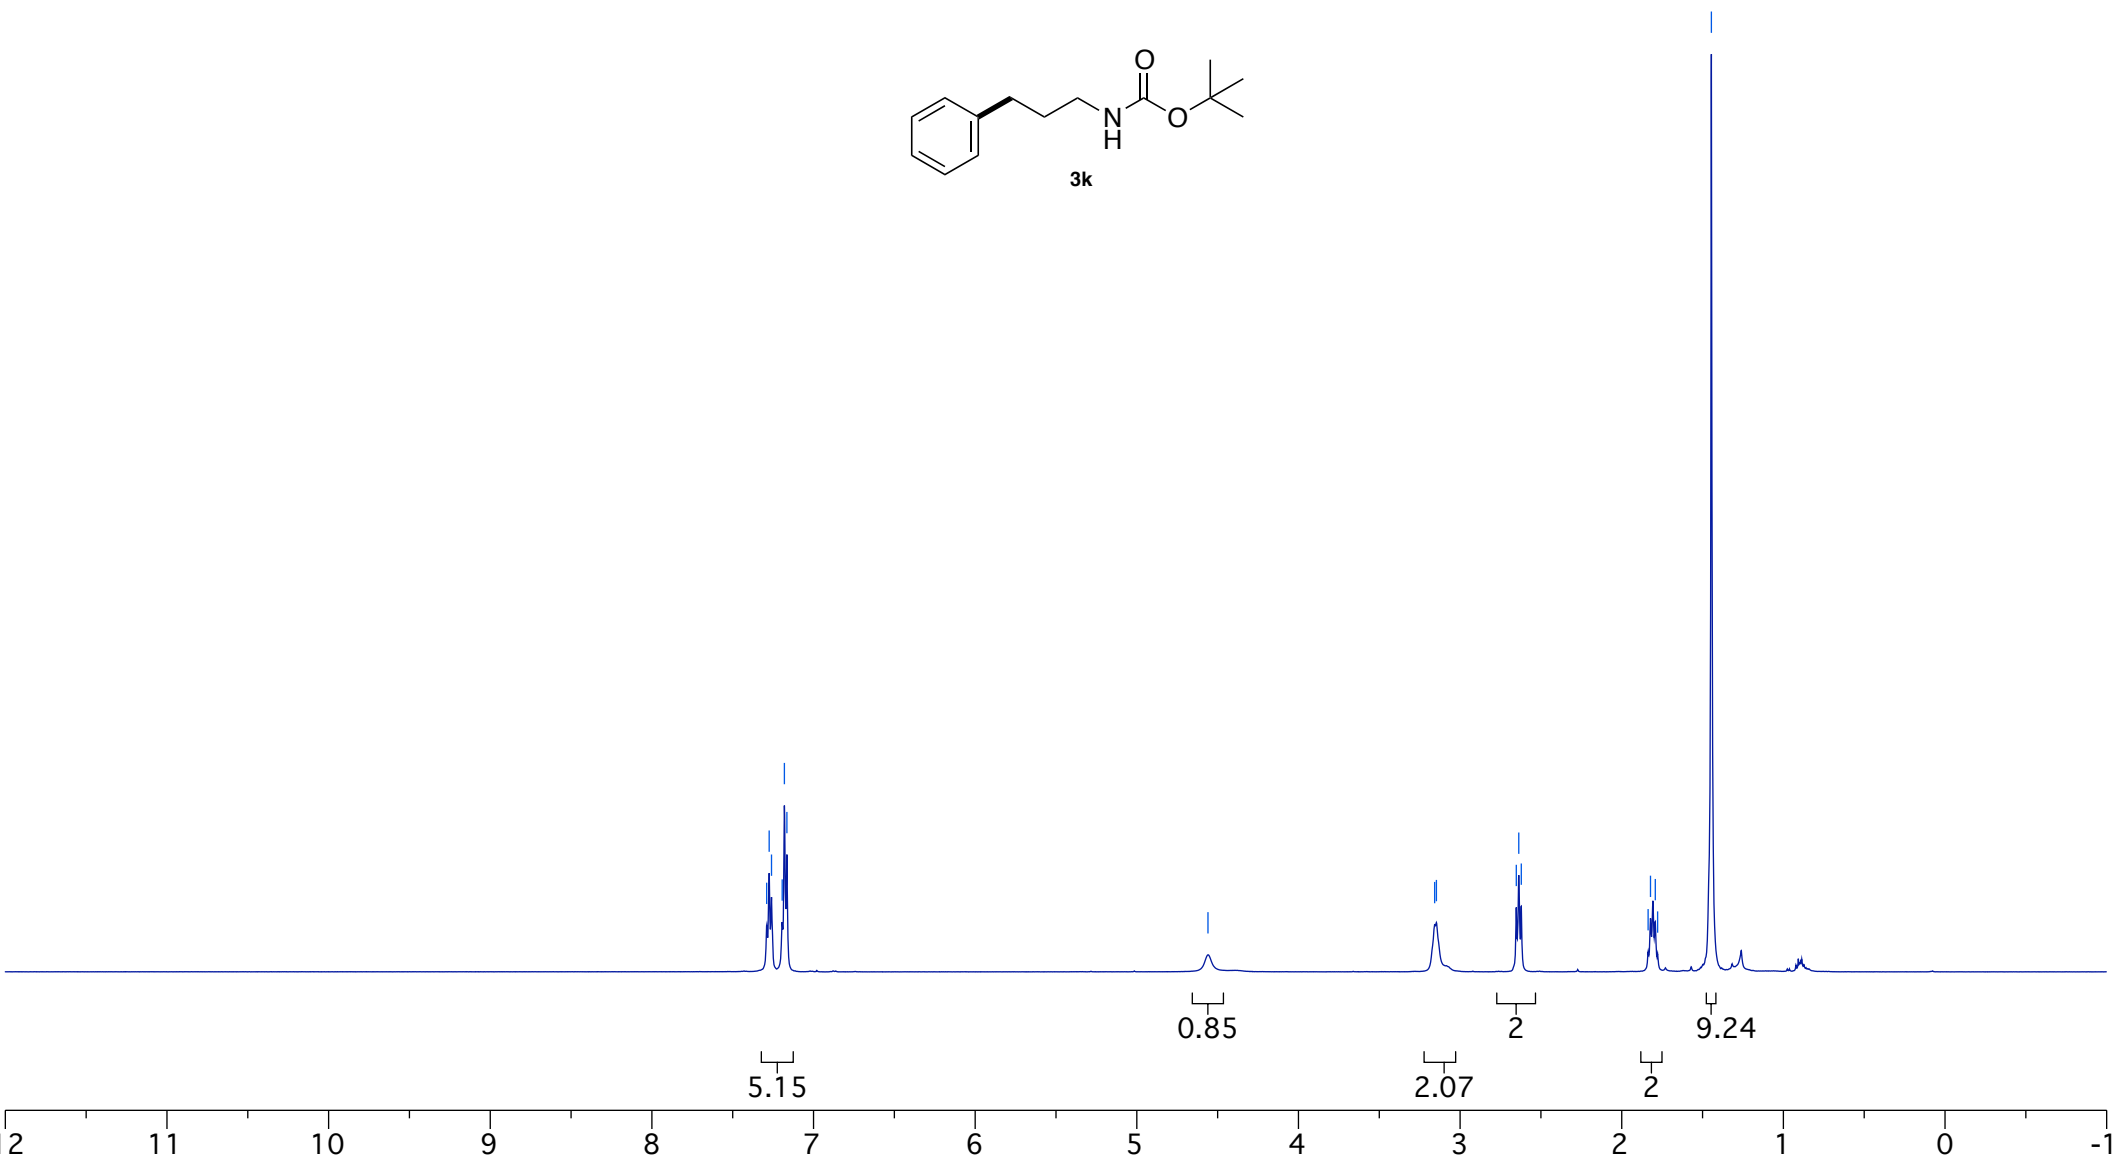

156.085

141.675

128.522

128.467

126.022

79.209

40.360

33.252

31.860

28.543

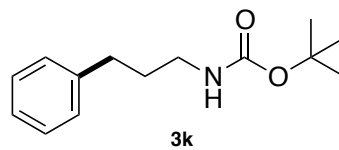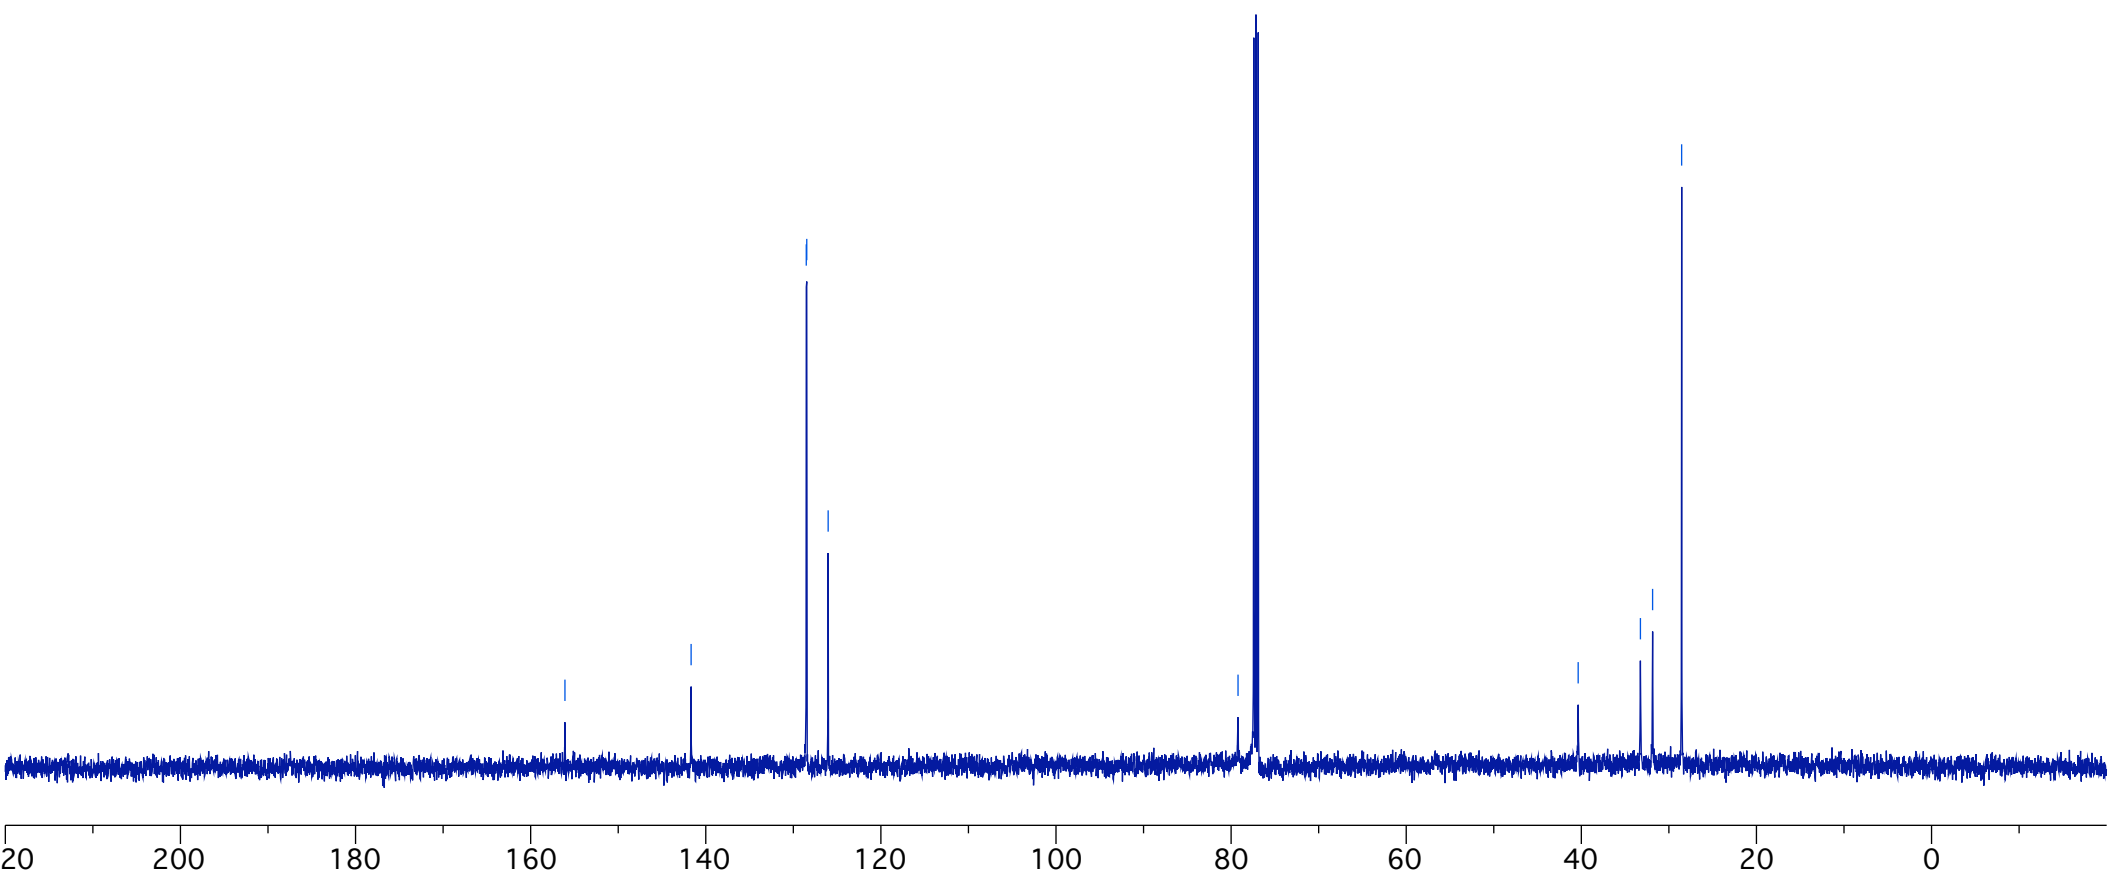

S-71

7.395  
7.365  
7.357  
7.348  
7.335  
7.319  
7.305  
7.245  
7.230  
7.215  
7.201

5.143  
4.987

3.259  
3.246

2.687  
2.672  
2.657

1.877  
1.862  
1.848

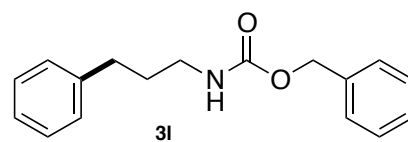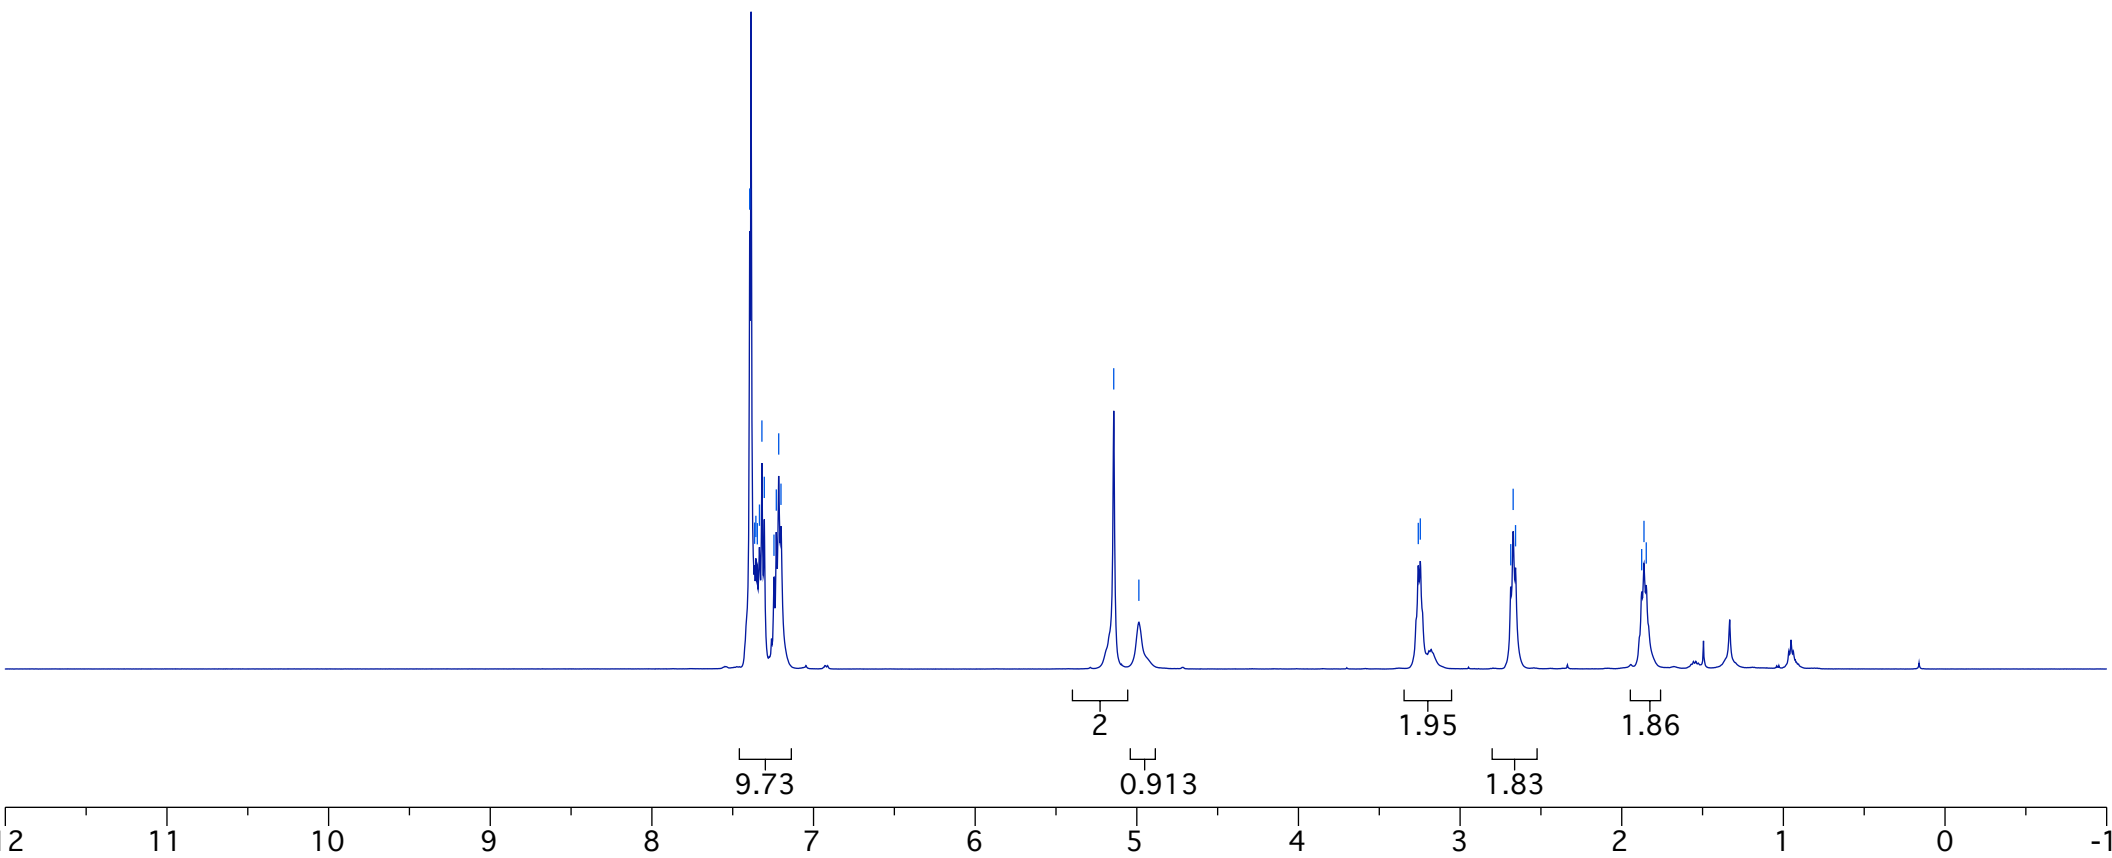

S-72

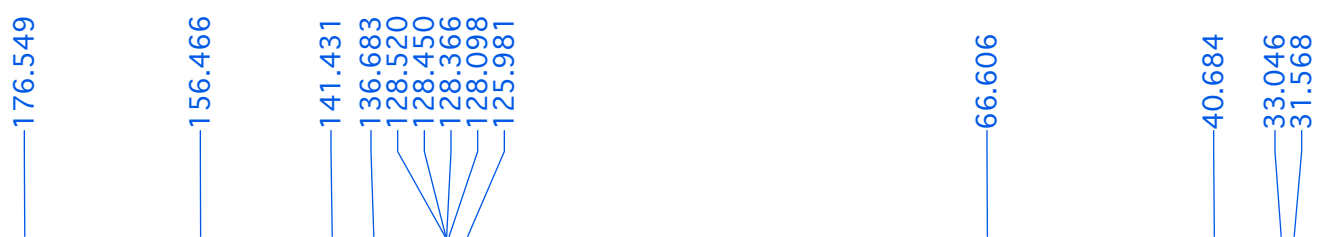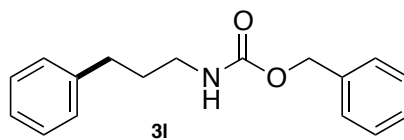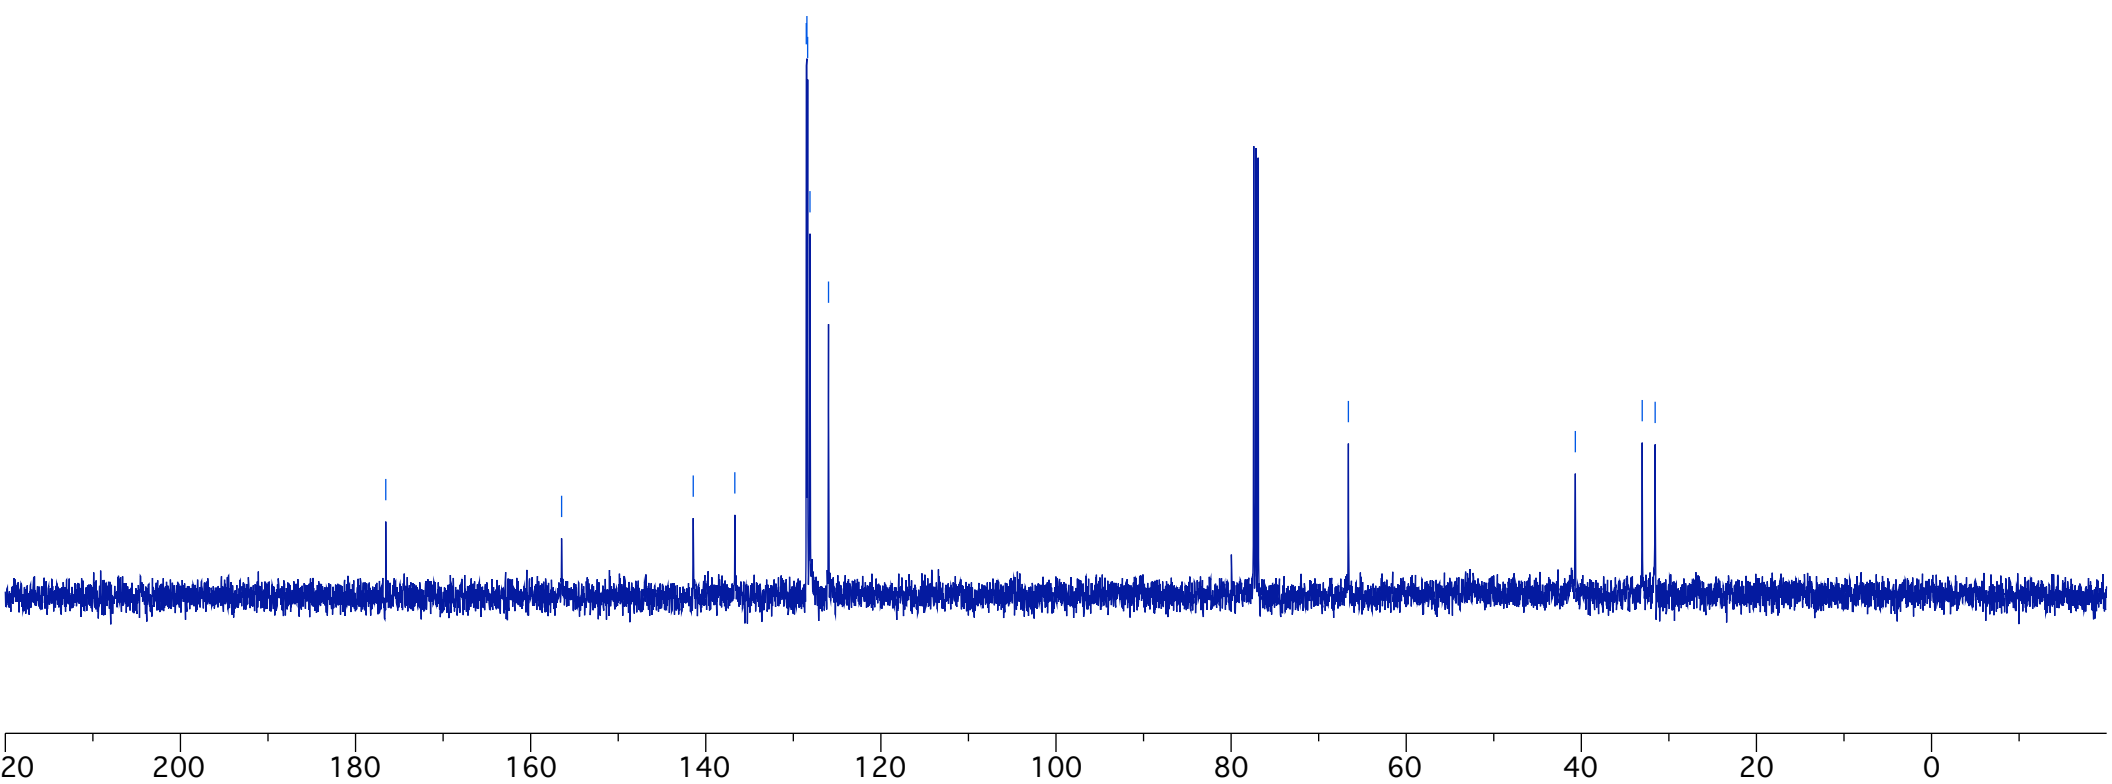



7.319  
7.304  
7.289  
7.228  
7.213  
7.192

5.226  
5.224  
5.215  
5.212  
5.210  
5.201  
5.198

2.683  
2.668  
2.651  
2.355  
2.340  
2.325  
2.310  
1.723  
1.601

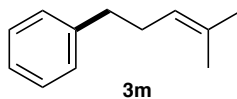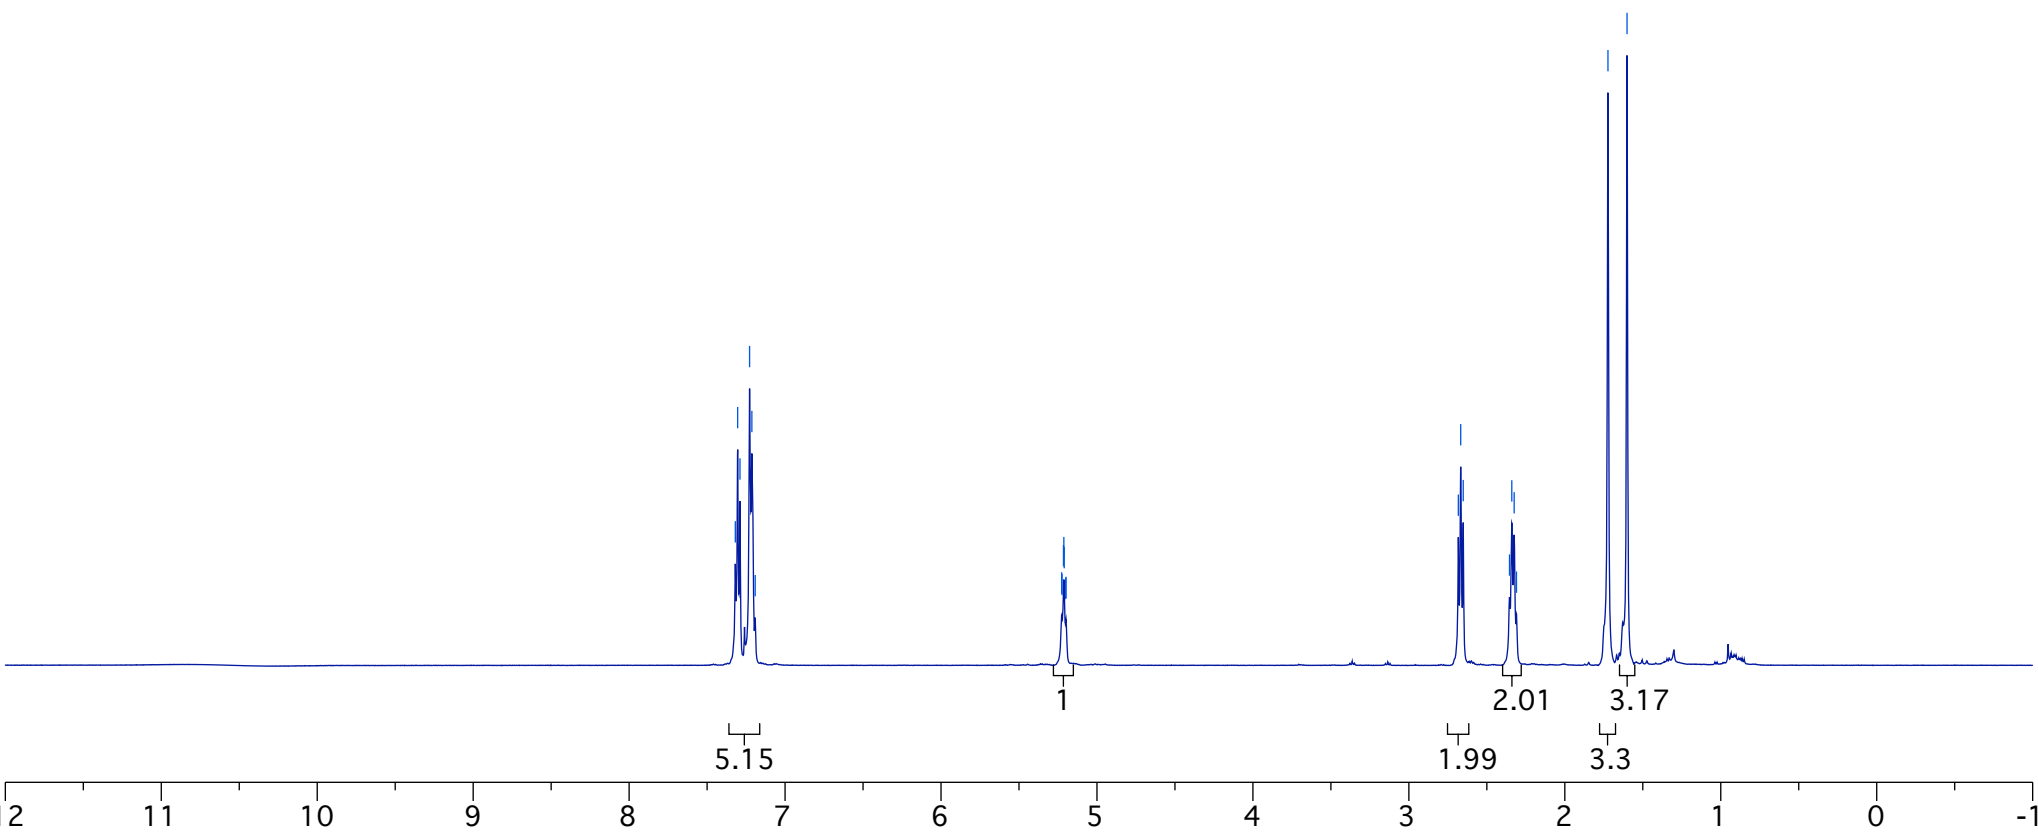

S-74

142.567  
132.238  
128.588  
128.360  
125.799  
123.910

36.314  
30.209  
25.810  
17.779

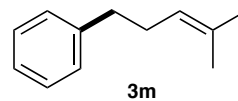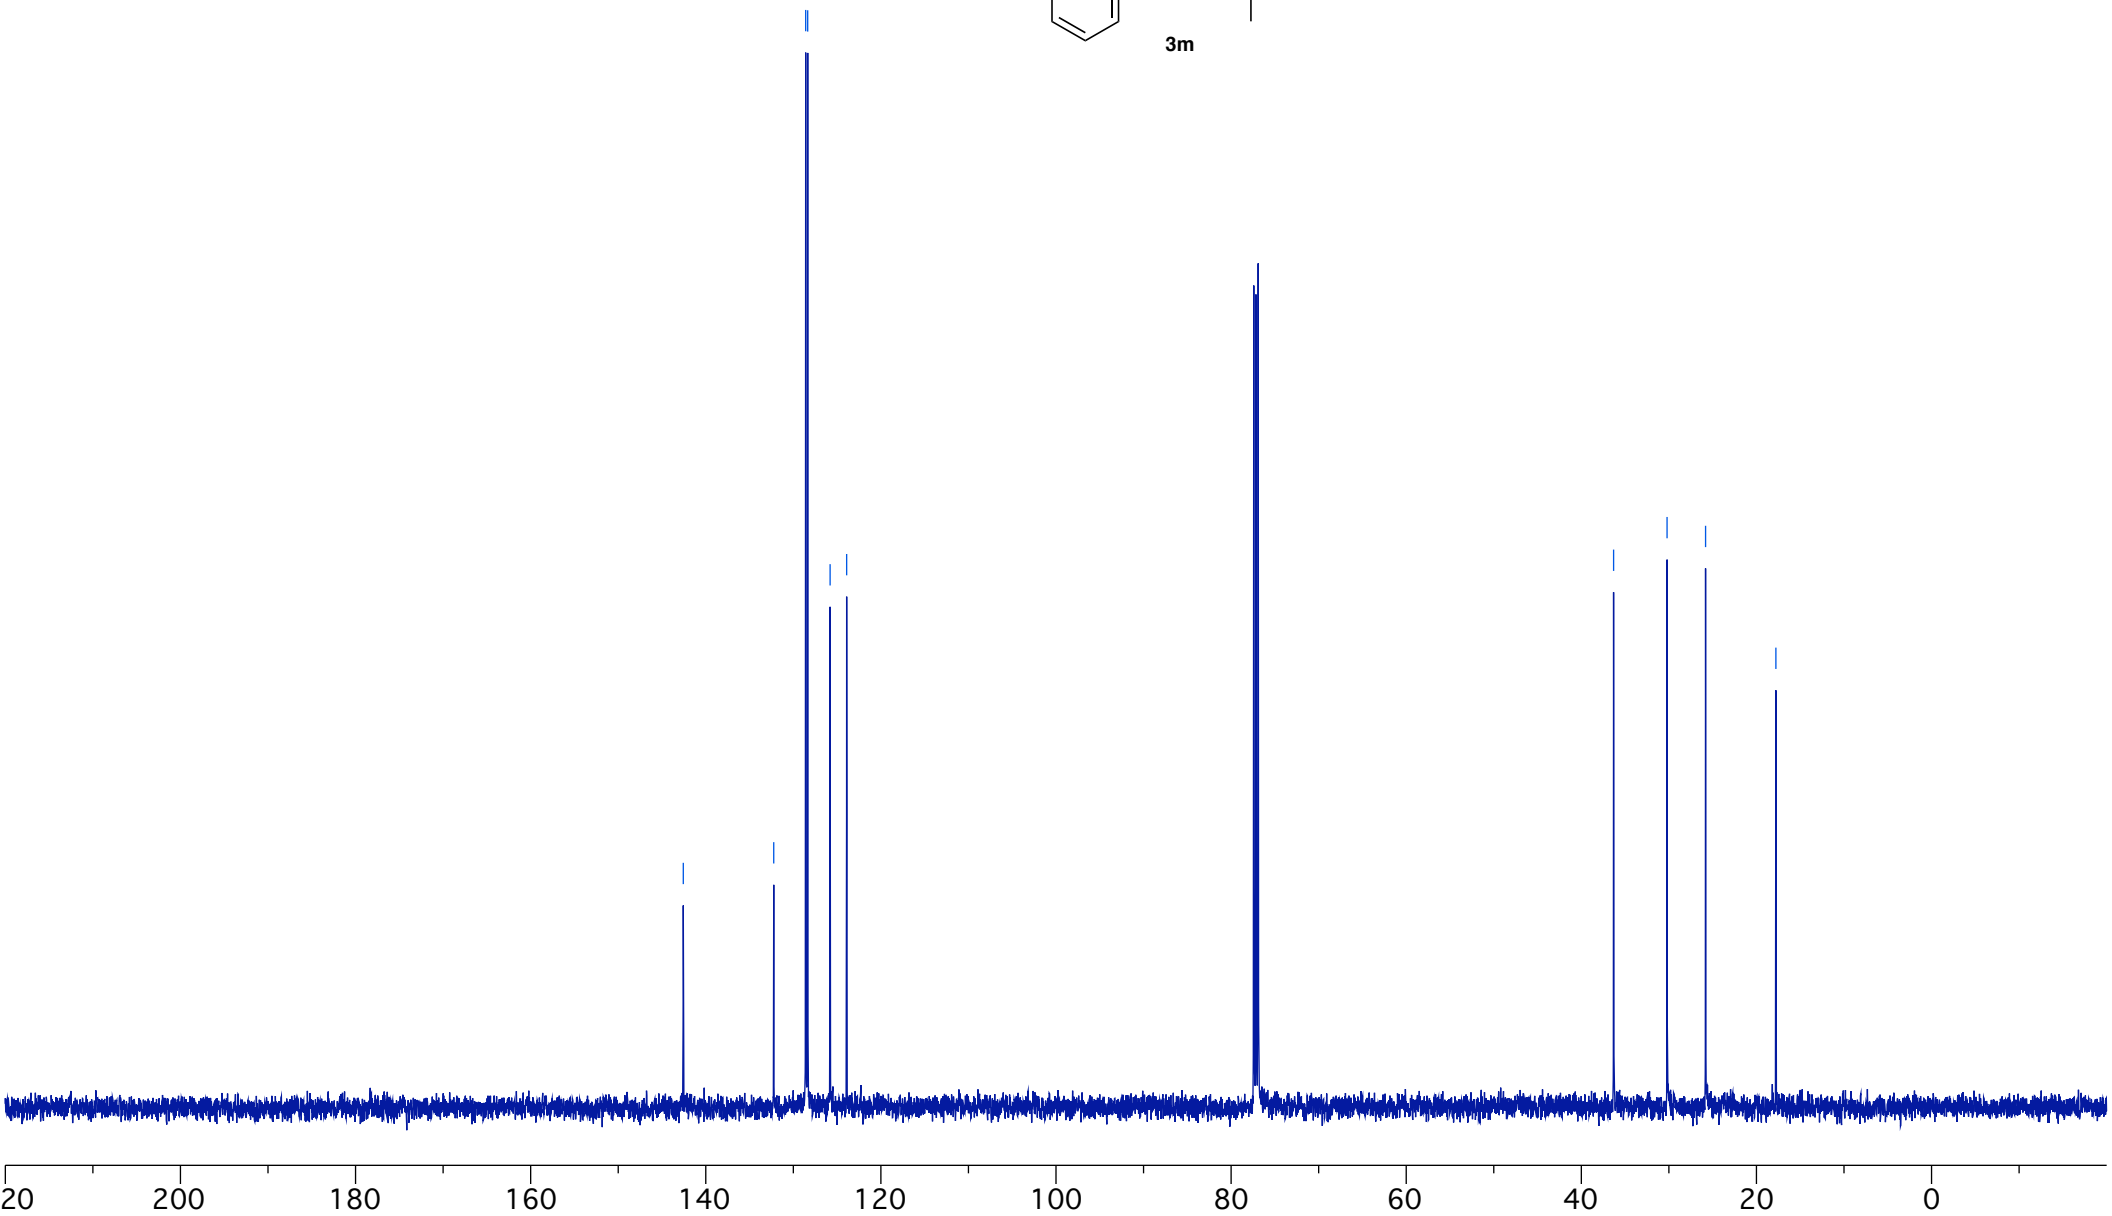

S-75

7.306  
7.287  
7.286  
7.269  
7.260  
7.192  
7.175

2.713  
2.696  
2.678  
2.660  
2.642  
2.625  
1.592  
1.579  
1.570  
1.559  
1.551  
1.539  
1.523  
1.266  
1.254  
1.240  
1.223  
0.865  
0.848  
0.831

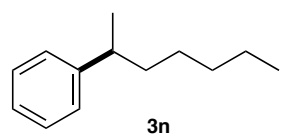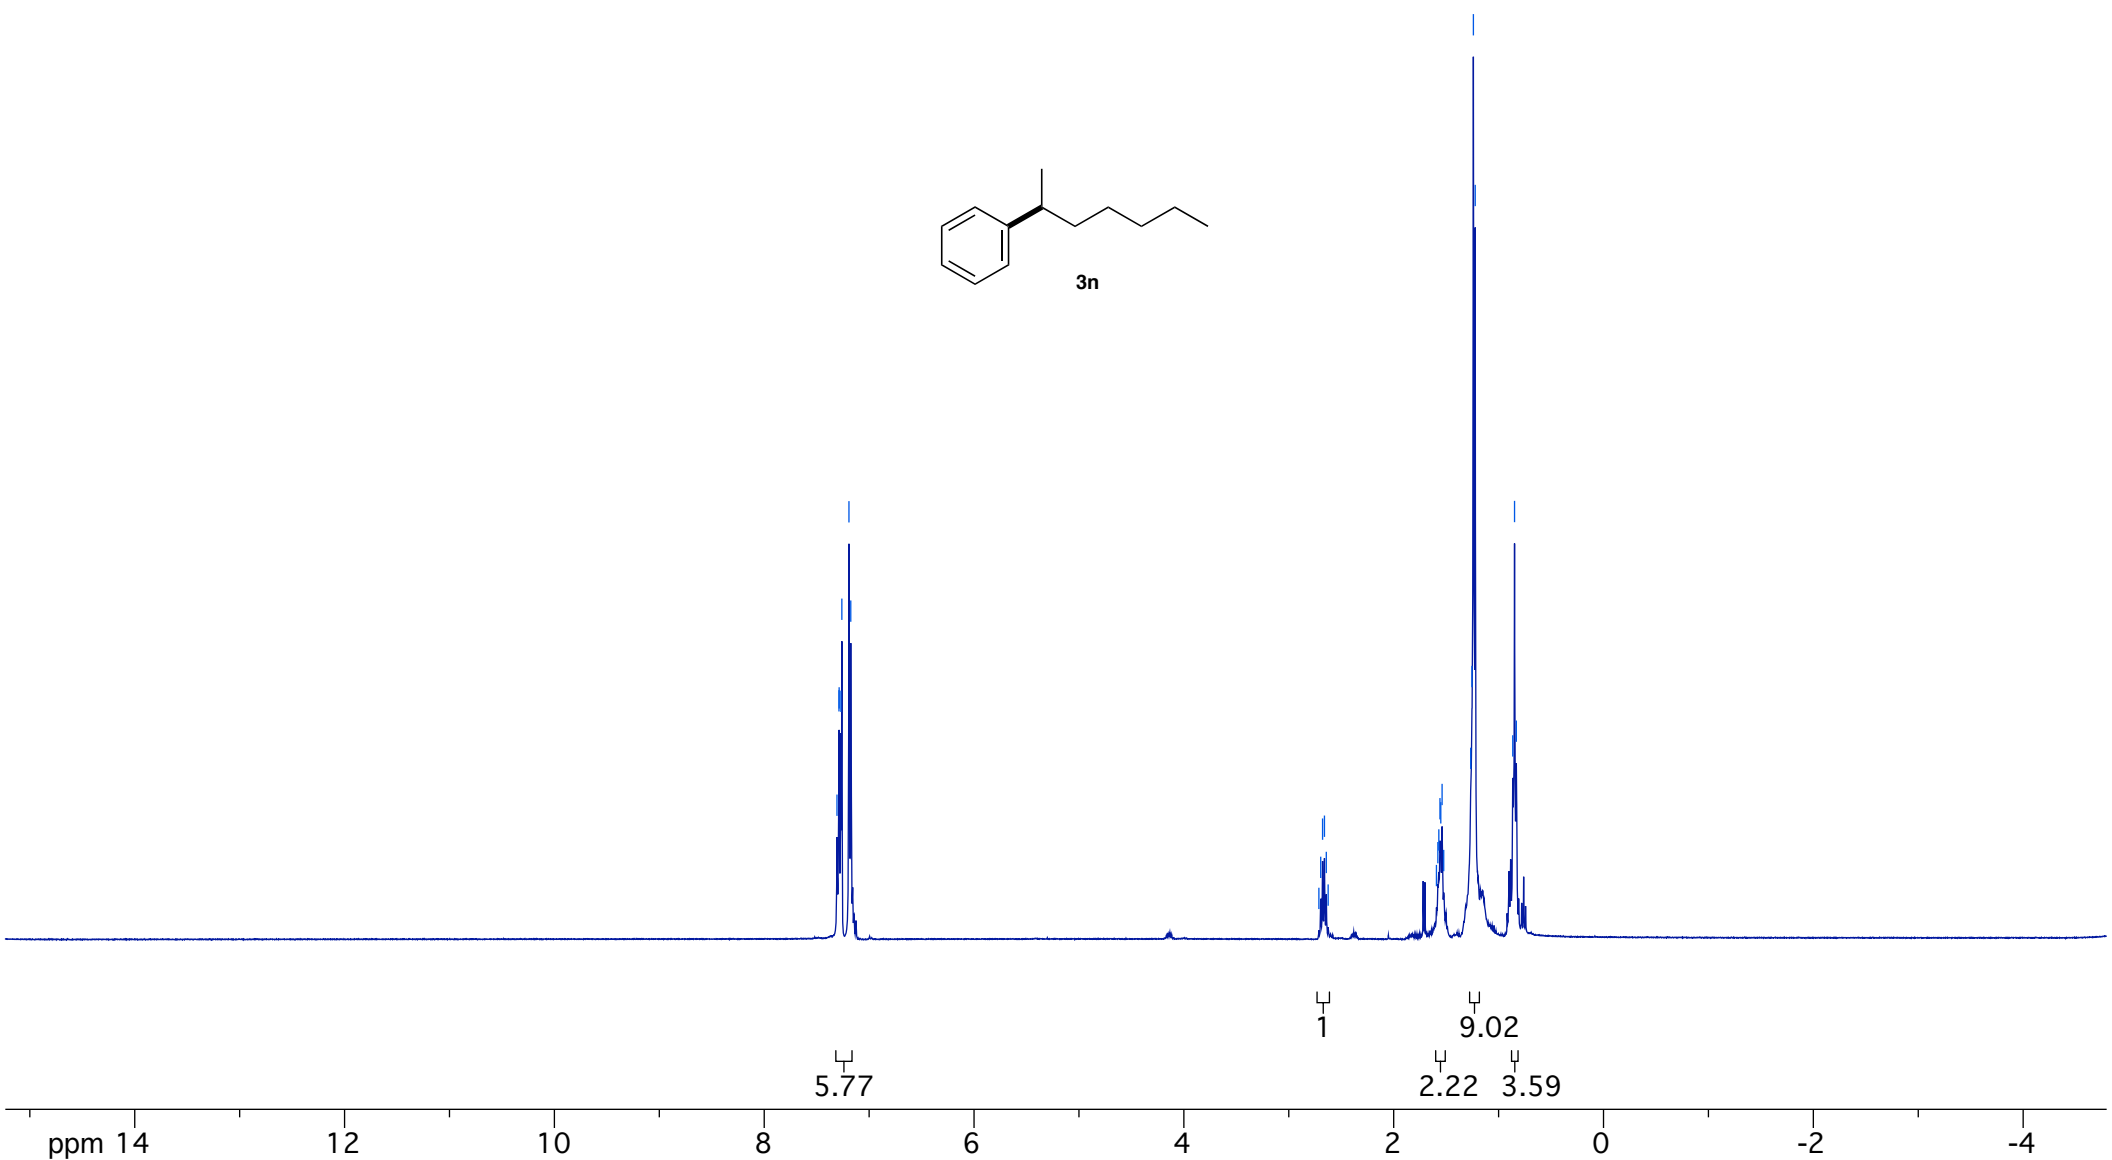

S-76

148.141  
128.381  
127.124  
125.854  
40.097  
38.565  
32.109  
27.546  
22.740  
22.471  
14.235

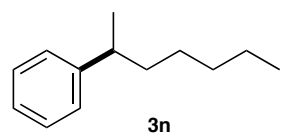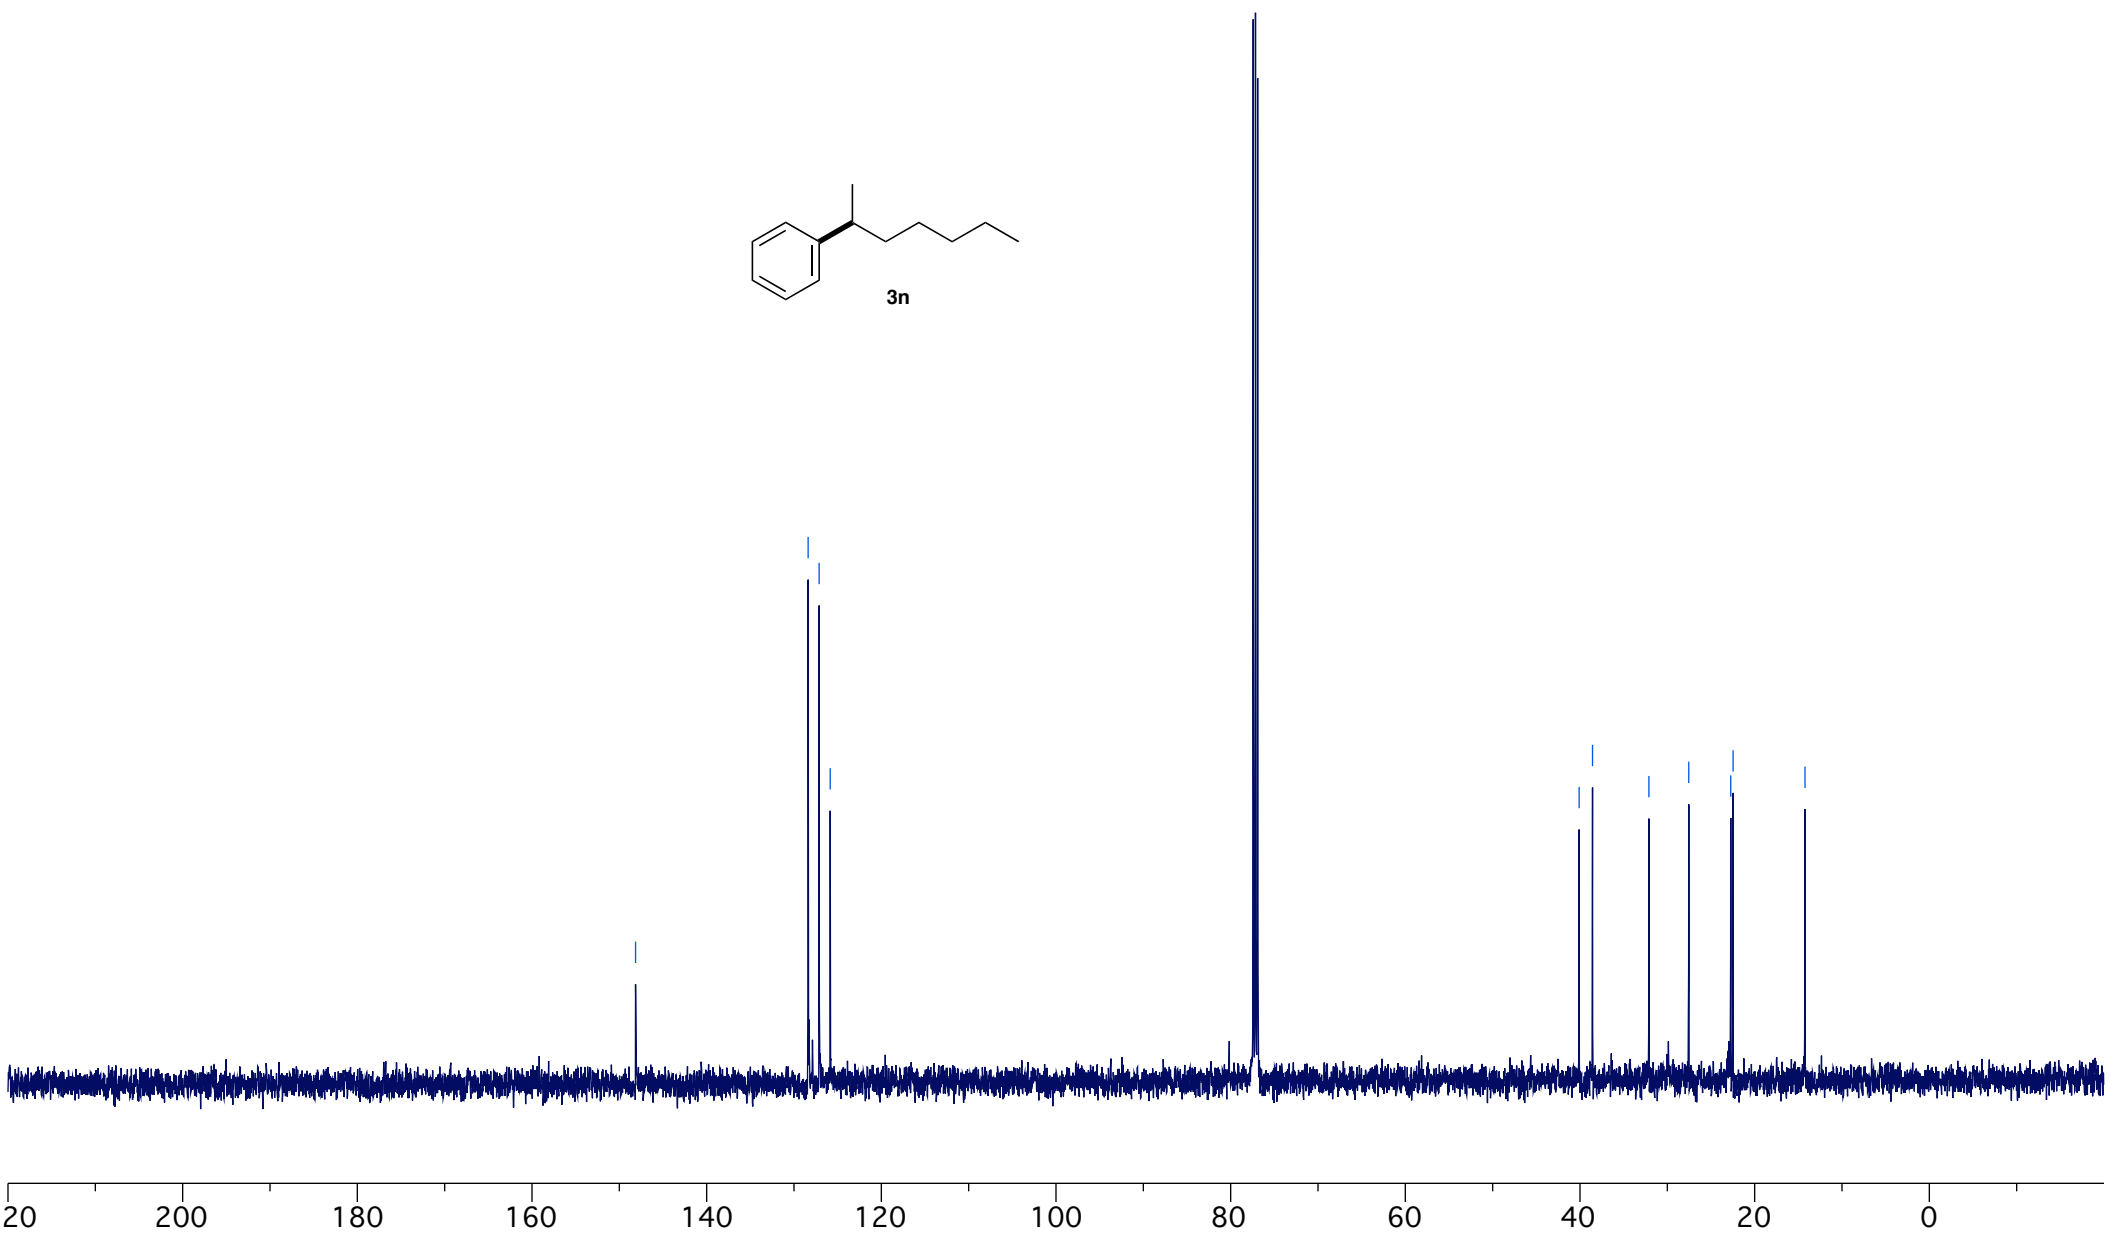

S-77

7.306  
7.290  
7.276  
7.260  
7.243  
7.190  
7.176  
7.162

3.031  
3.012  
2.997  
2.981  
2.978  
2.963  
2.081  
2.074  
2.071  
2.069  
2.064  
1.829  
1.817  
1.813  
1.807  
1.803  
1.802  
1.710  
1.706  
1.700  
1.696  
1.685  
1.615  
1.608  
1.602  
1.598  
1.586  
1.583

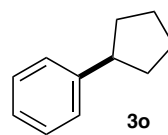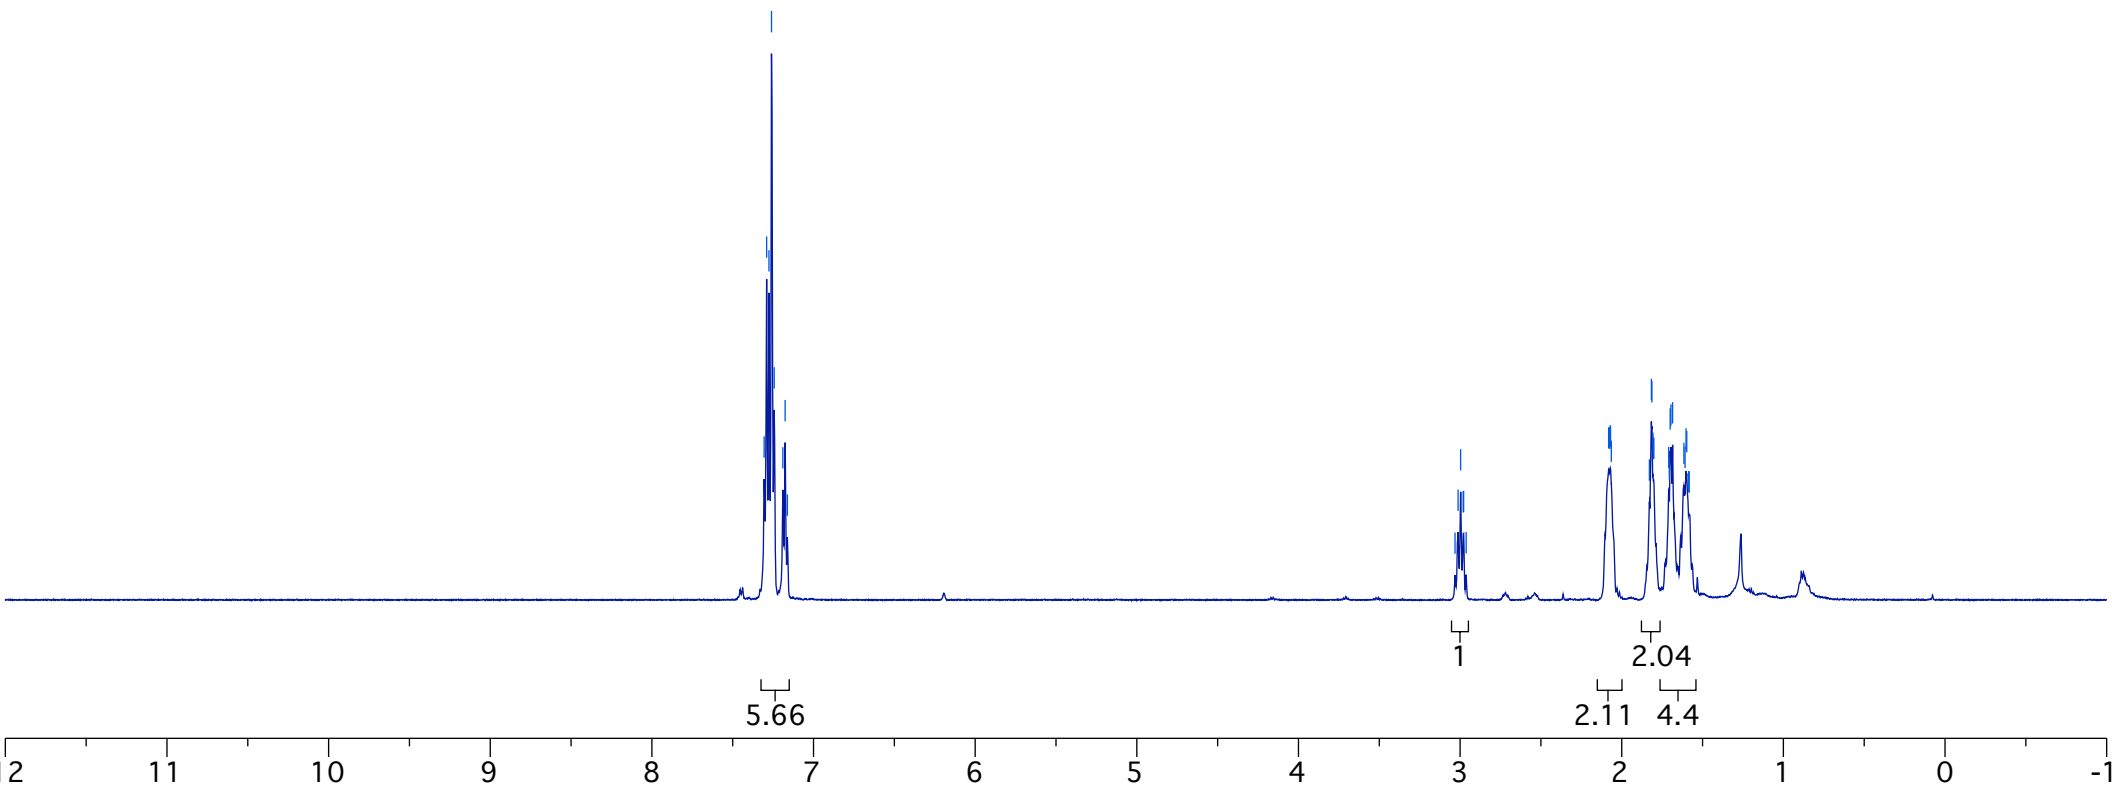

146.668

128.355

127.239

125.799

46.098

34.755

25.680

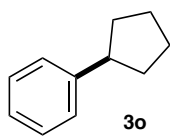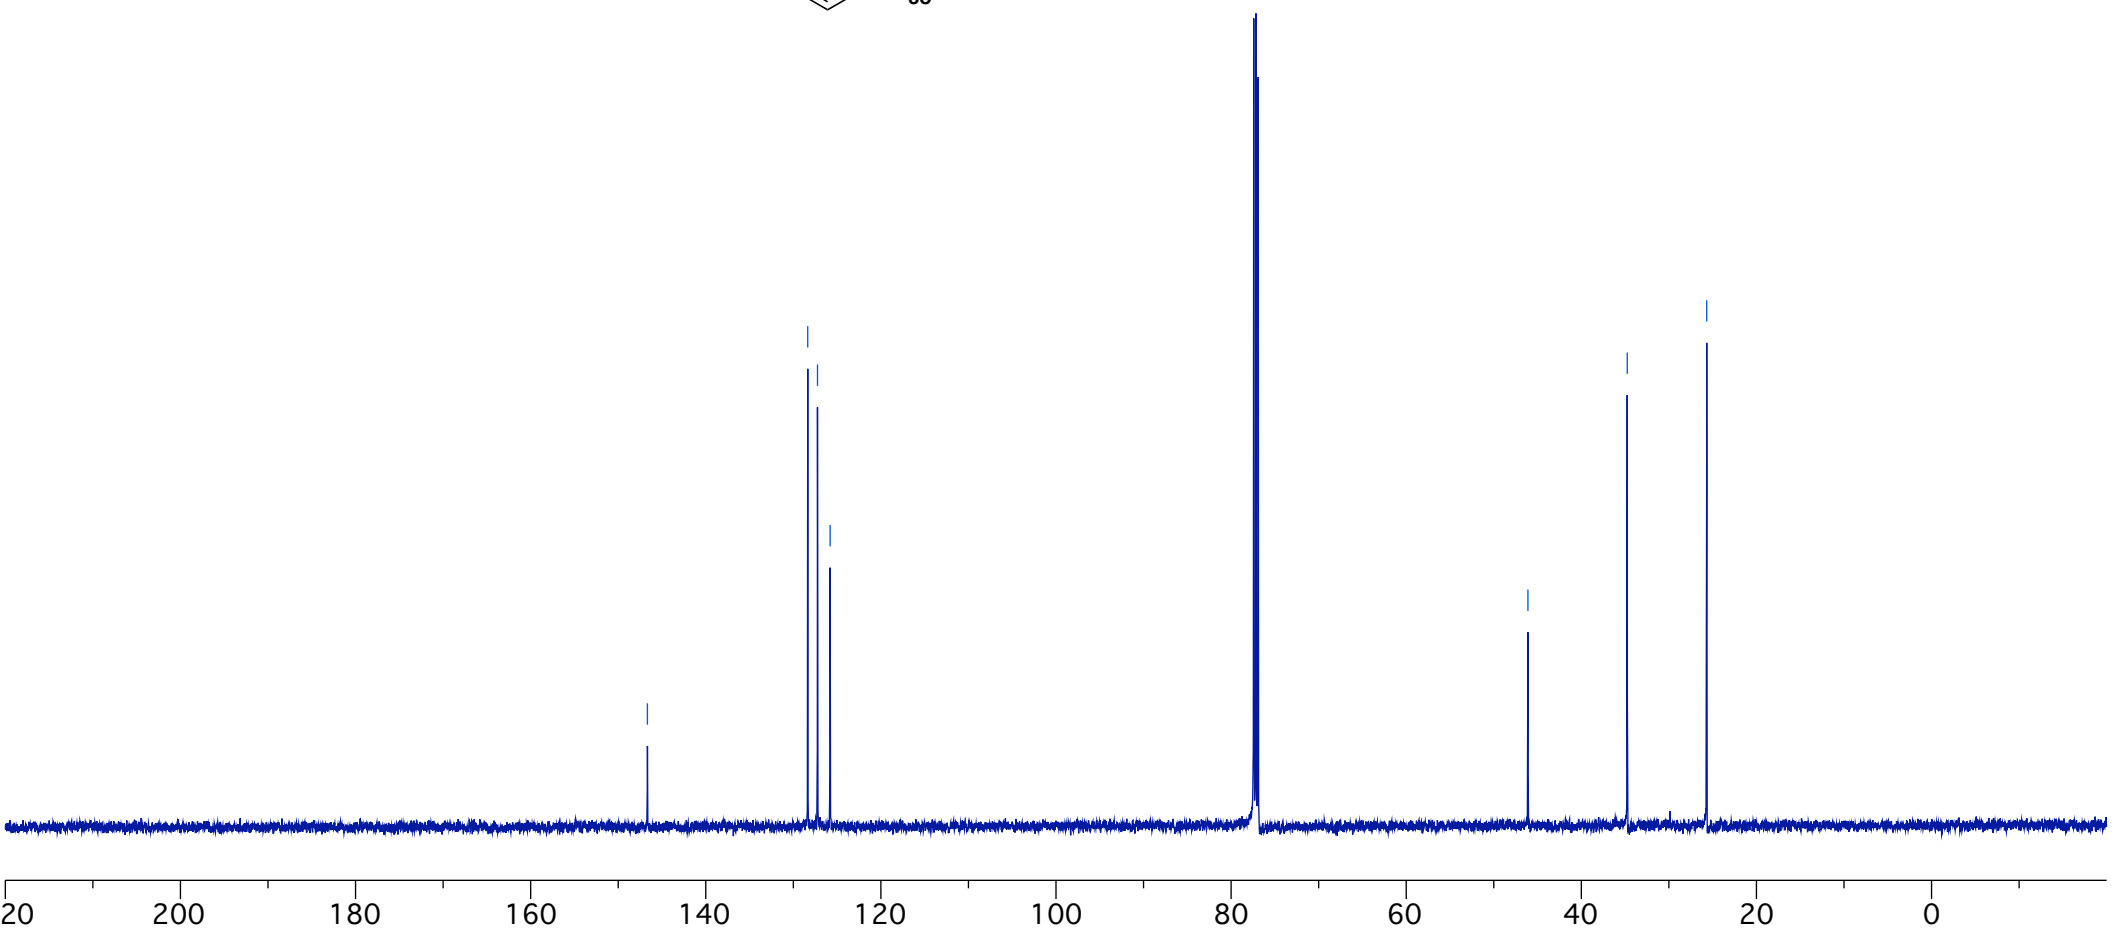

S-79

7.290  
7.286  
7.272  
7.265  
7.260  
7.200  
7.185  
7.172  
7.157  
7.143  
2.685  
2.679  
2.671  
2.664  
2.659  
2.652  
2.643  
2.638  
1.931  
1.925  
1.919  
1.912  
1.904  
1.898  
1.814  
1.809  
1.802  
1.795  
1.789  
1.783  
1.777  
1.737  
1.712  
1.706  
1.699  
1.692  
1.688  
1.671  
1.665  
1.650  
1.644  
1.639  
1.622  
1.617  
1.611  
1.605  
1.600  
1.592  
1.579  
1.574  
1.558  
1.554  
1.536  
1.534  
1.516  
1.514

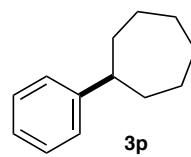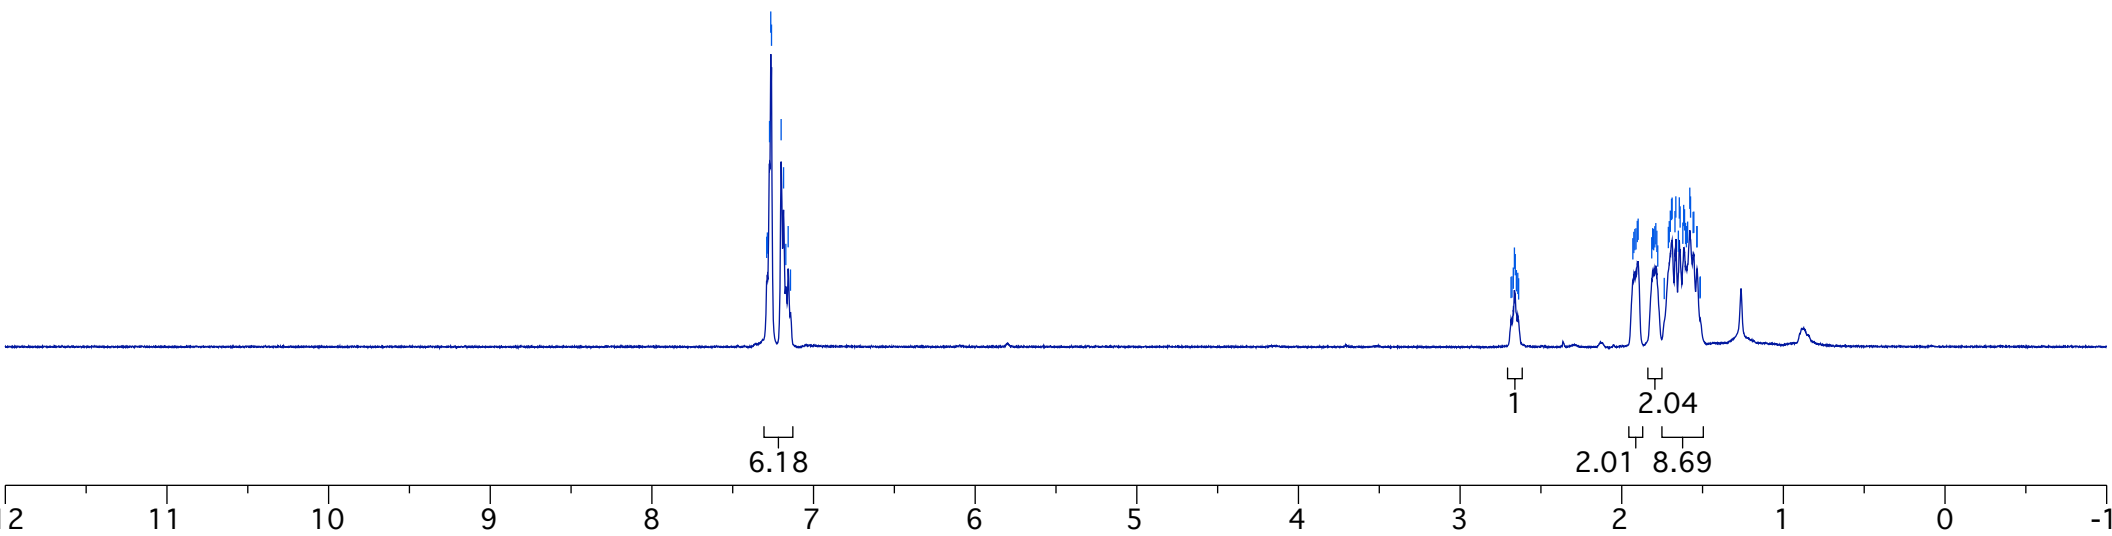

150.151  
128.419  
126.811  
125.629  
47.206  
36.975  
28.114  
27.390

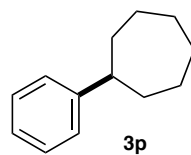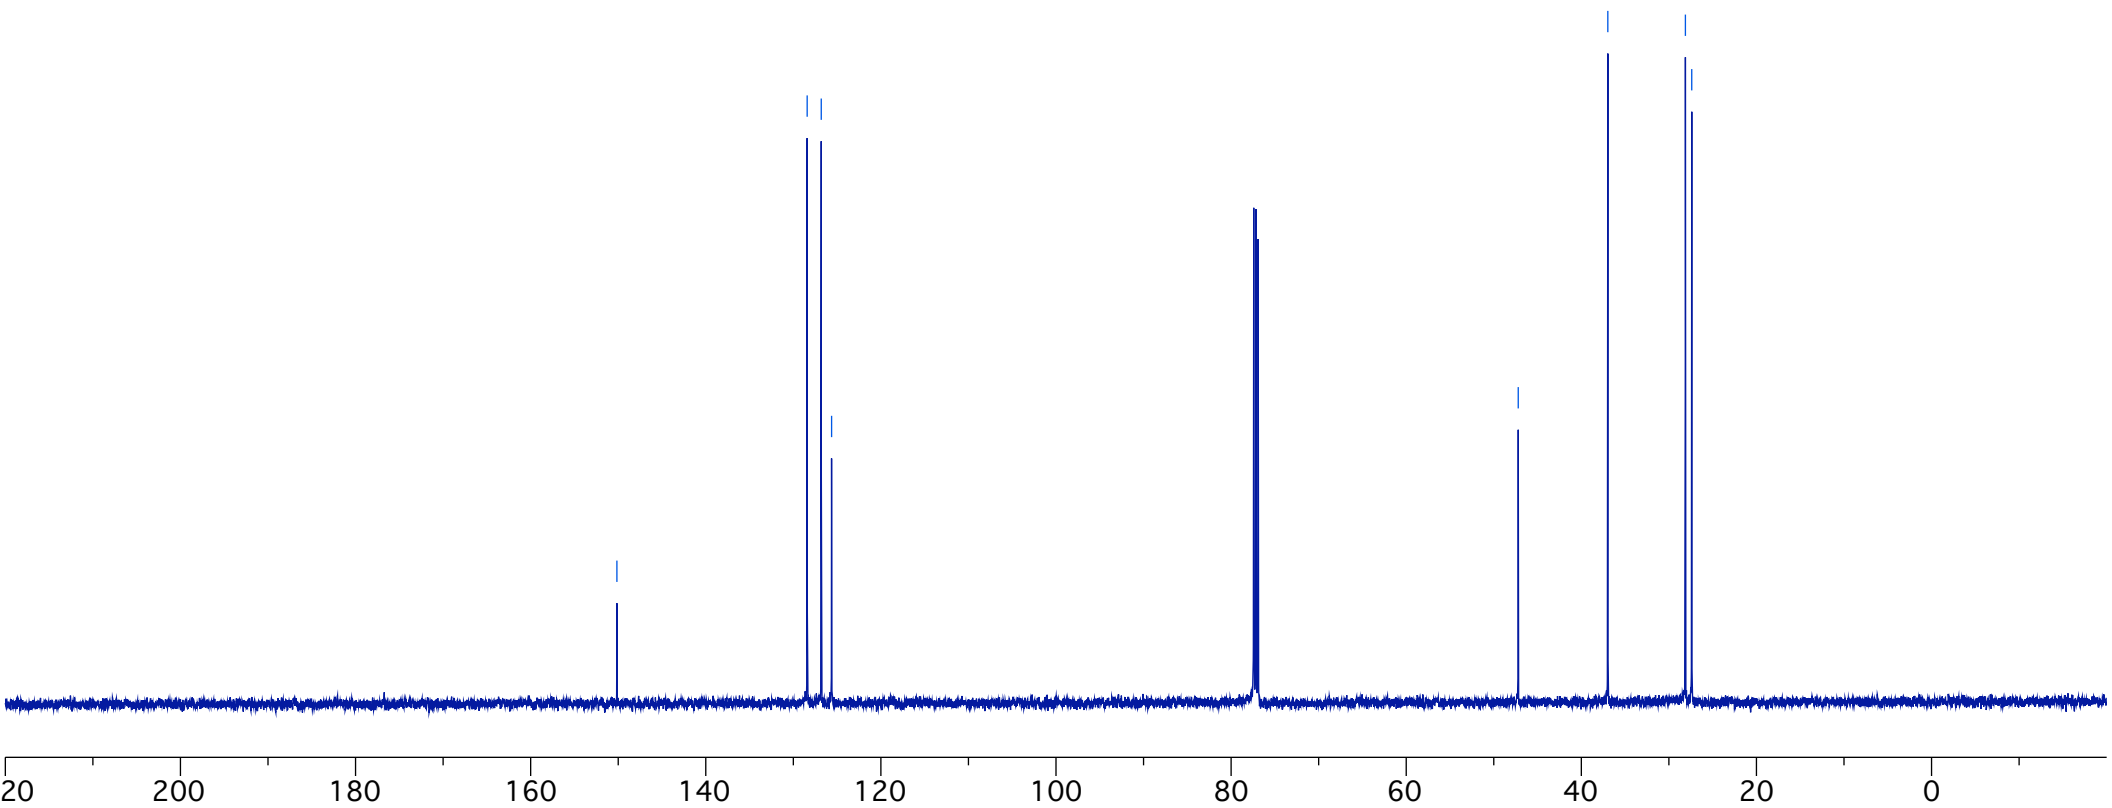



S-81

7.357  
7.339  
7.335  
7.325  
7.322  
7.313

5.120  
4.734  
4.695

2.377  
2.362  
2.347  
2.329  
2.073  
2.058  
2.043  
2.029  
2.015  
2.000  
1.985  
1.825  
1.810  
1.795  
1.780  
1.765  
1.027  
0.997

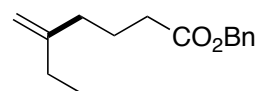

**3q**

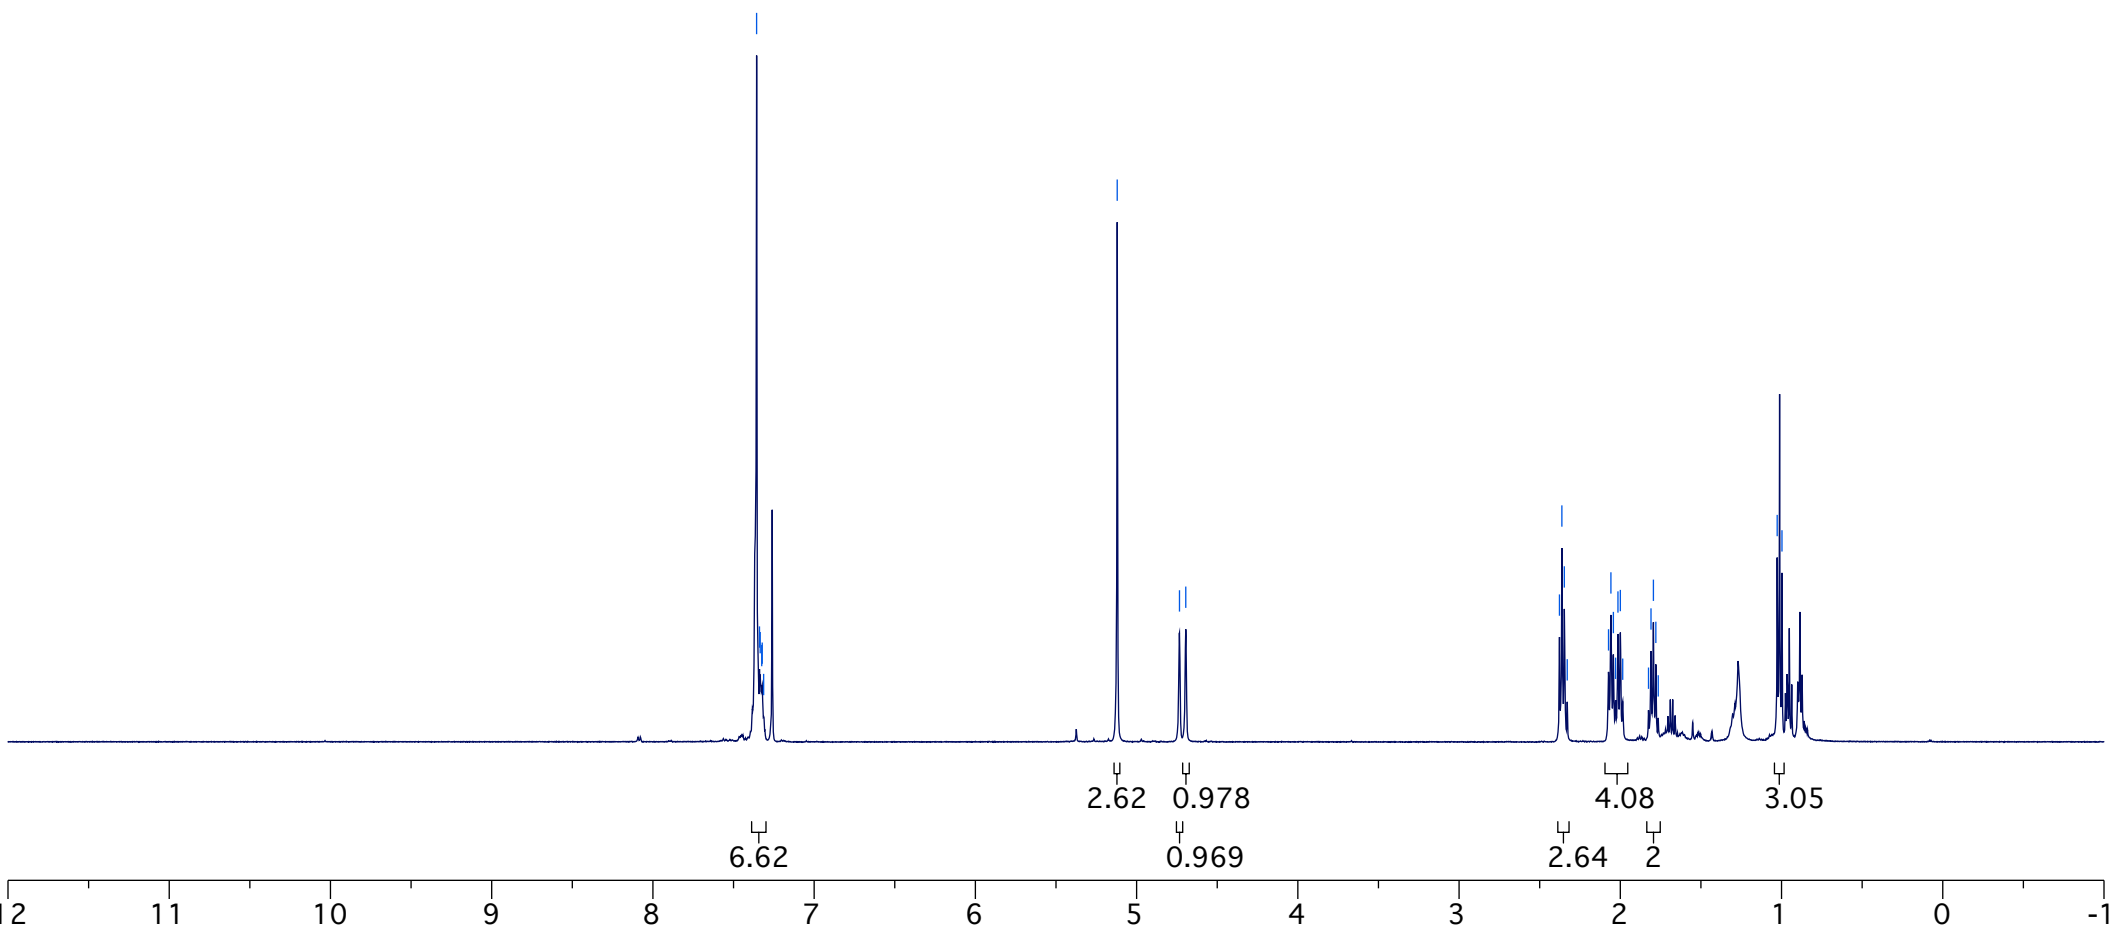

S-82

173.610  
150.411  
136.231  
128.675  
128.322  
128.287  
108.551  
66.244  
35.609  
33.920  
28.652  
23.108  
12.430

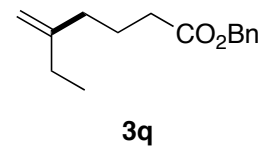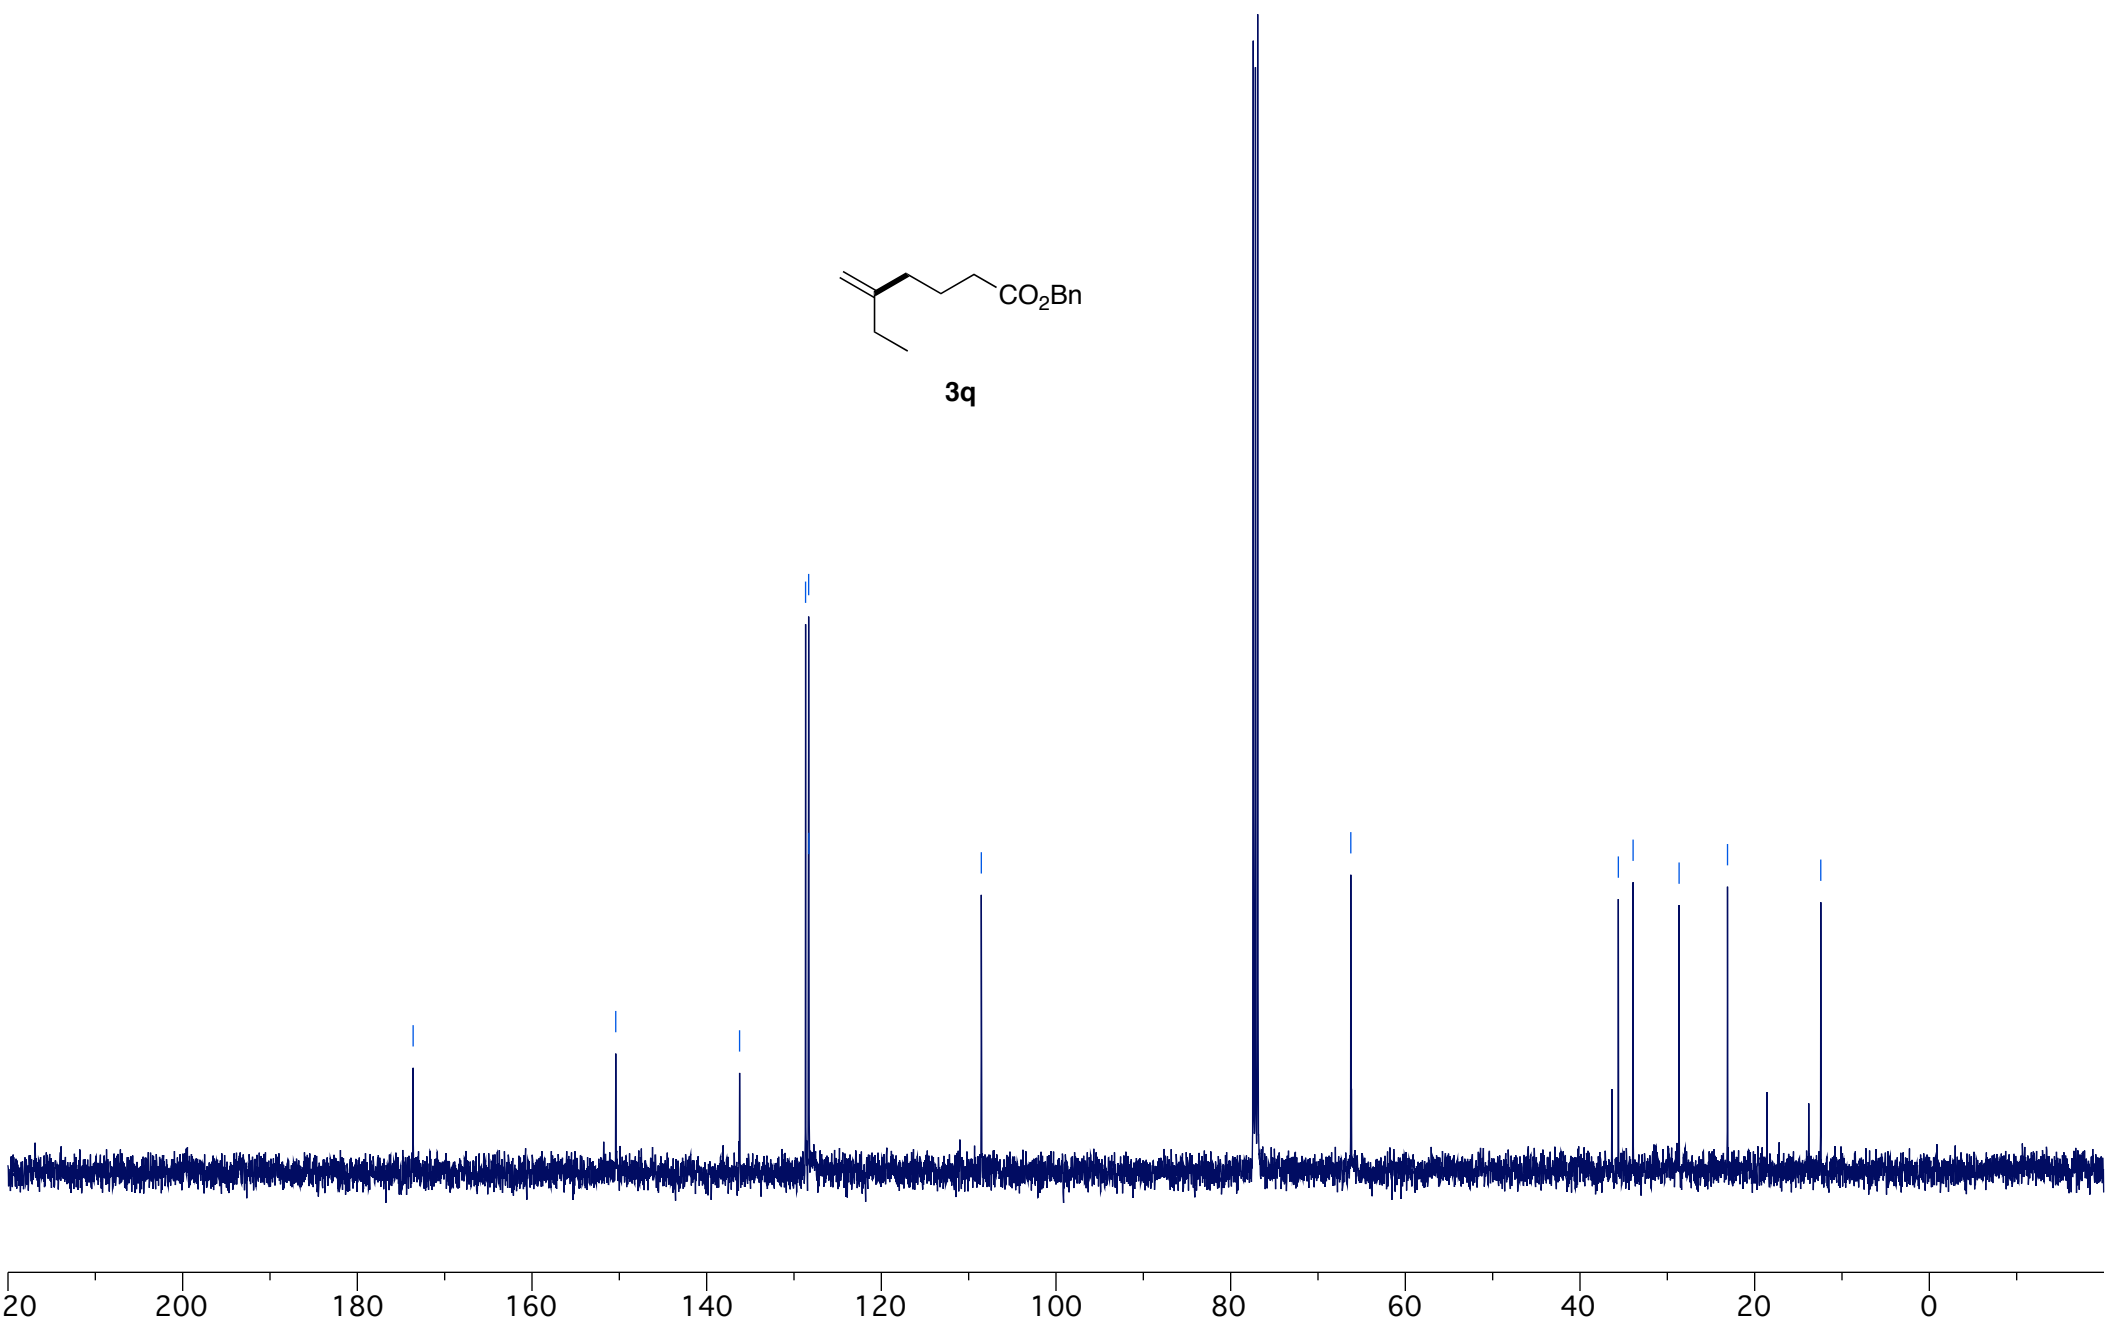

S-83

7.363  
7.345  
7.335  
7.329

5.124  
5.093  
5.077

2.375  
2.367  
2.360  
2.353  
2.346  
2.339  
2.329  
2.046  
2.032  
2.019  
2.001  
1.714  
1.707  
1.691  
1.671  
1.655  
1.582

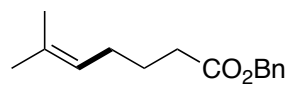

**3r**

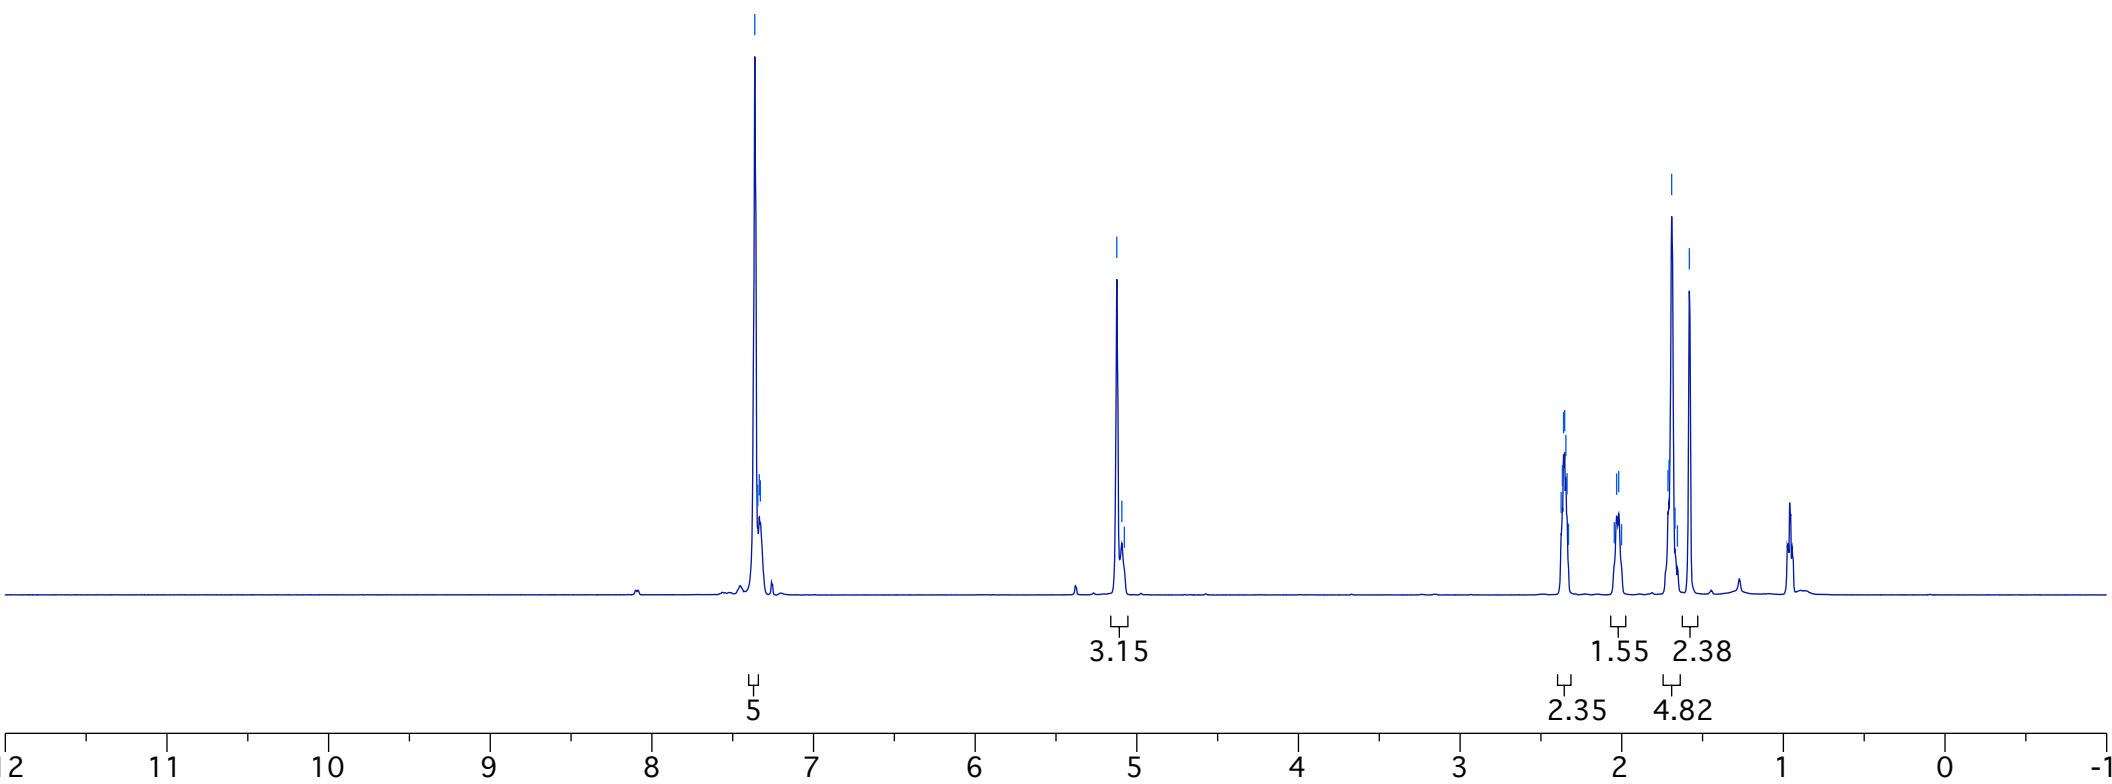

S-84

173.704

136.249

132.638

128.645

128.298

128.260

123.551

66.187

33.859

27.469

25.824

25.169

17.777

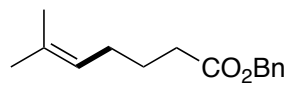

**3r**

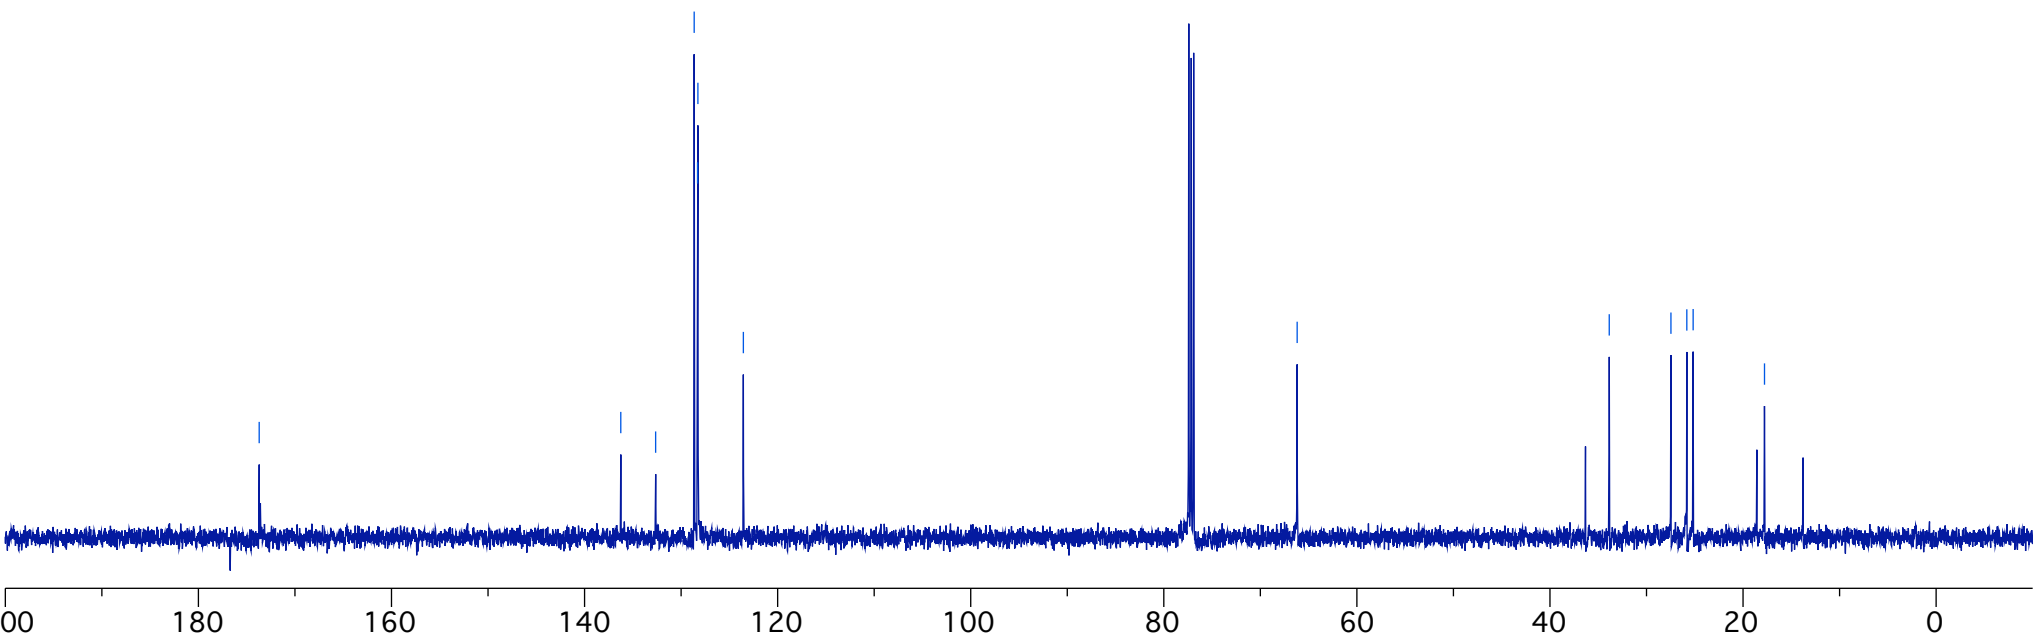

S-85

2.369  
2.354  
2.345  
2.331  
2.315  
2.032  
2.017  
2.003  
1.796  
1.780  
1.766  
1.751  
1.736  
1.718  
1.703  
1.688  
1.674  
1.592  
1.580  
1.566  
1.547  
1.533

7.366  
7.345  
7.339  
7.329

5.225  
5.214  
5.201  
5.188  
5.127

2.369  
2.354  
2.345  
2.331  
2.315  
2.032  
2.017  
2.003  
1.796  
1.780  
1.766  
1.751  
1.736  
1.718  
1.703  
1.688  
1.674  
1.592  
1.580  
1.566  
1.547  
1.533

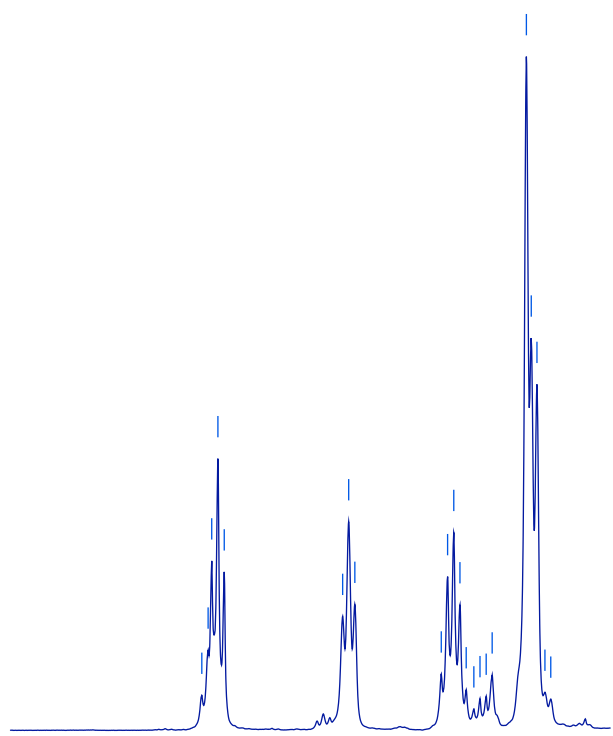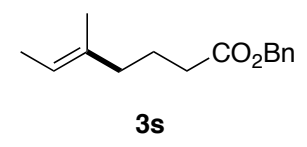

5.97

2.31

2.27  
1.86  
0.576

0.137  
2.03  
5.99

2 11 10 9 8 7 6 5 4 3 2 1 0 -1

S-86

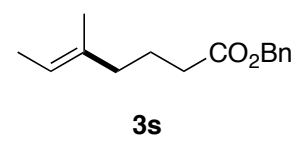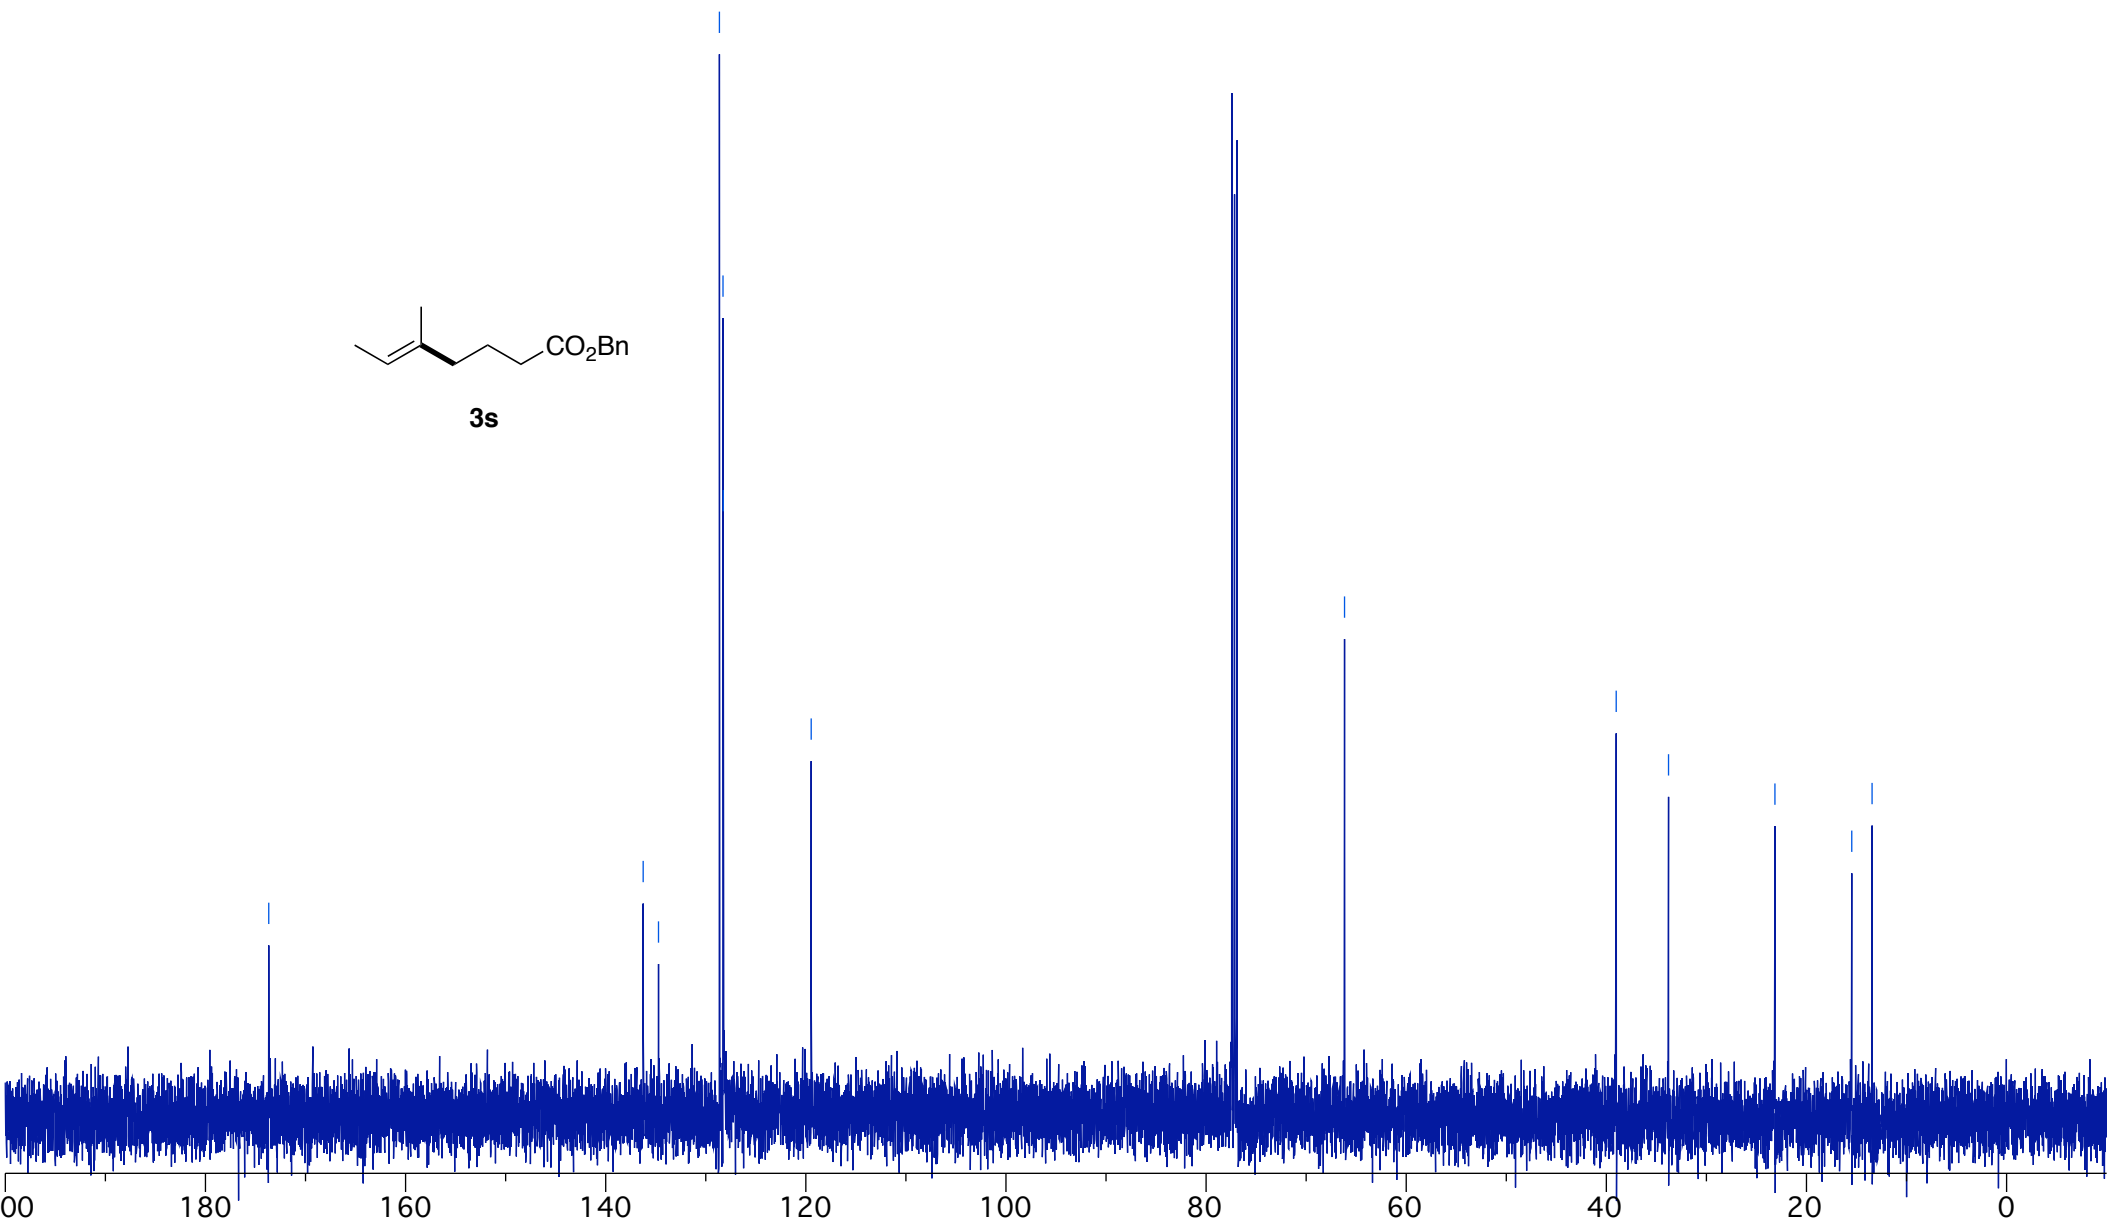

S-87

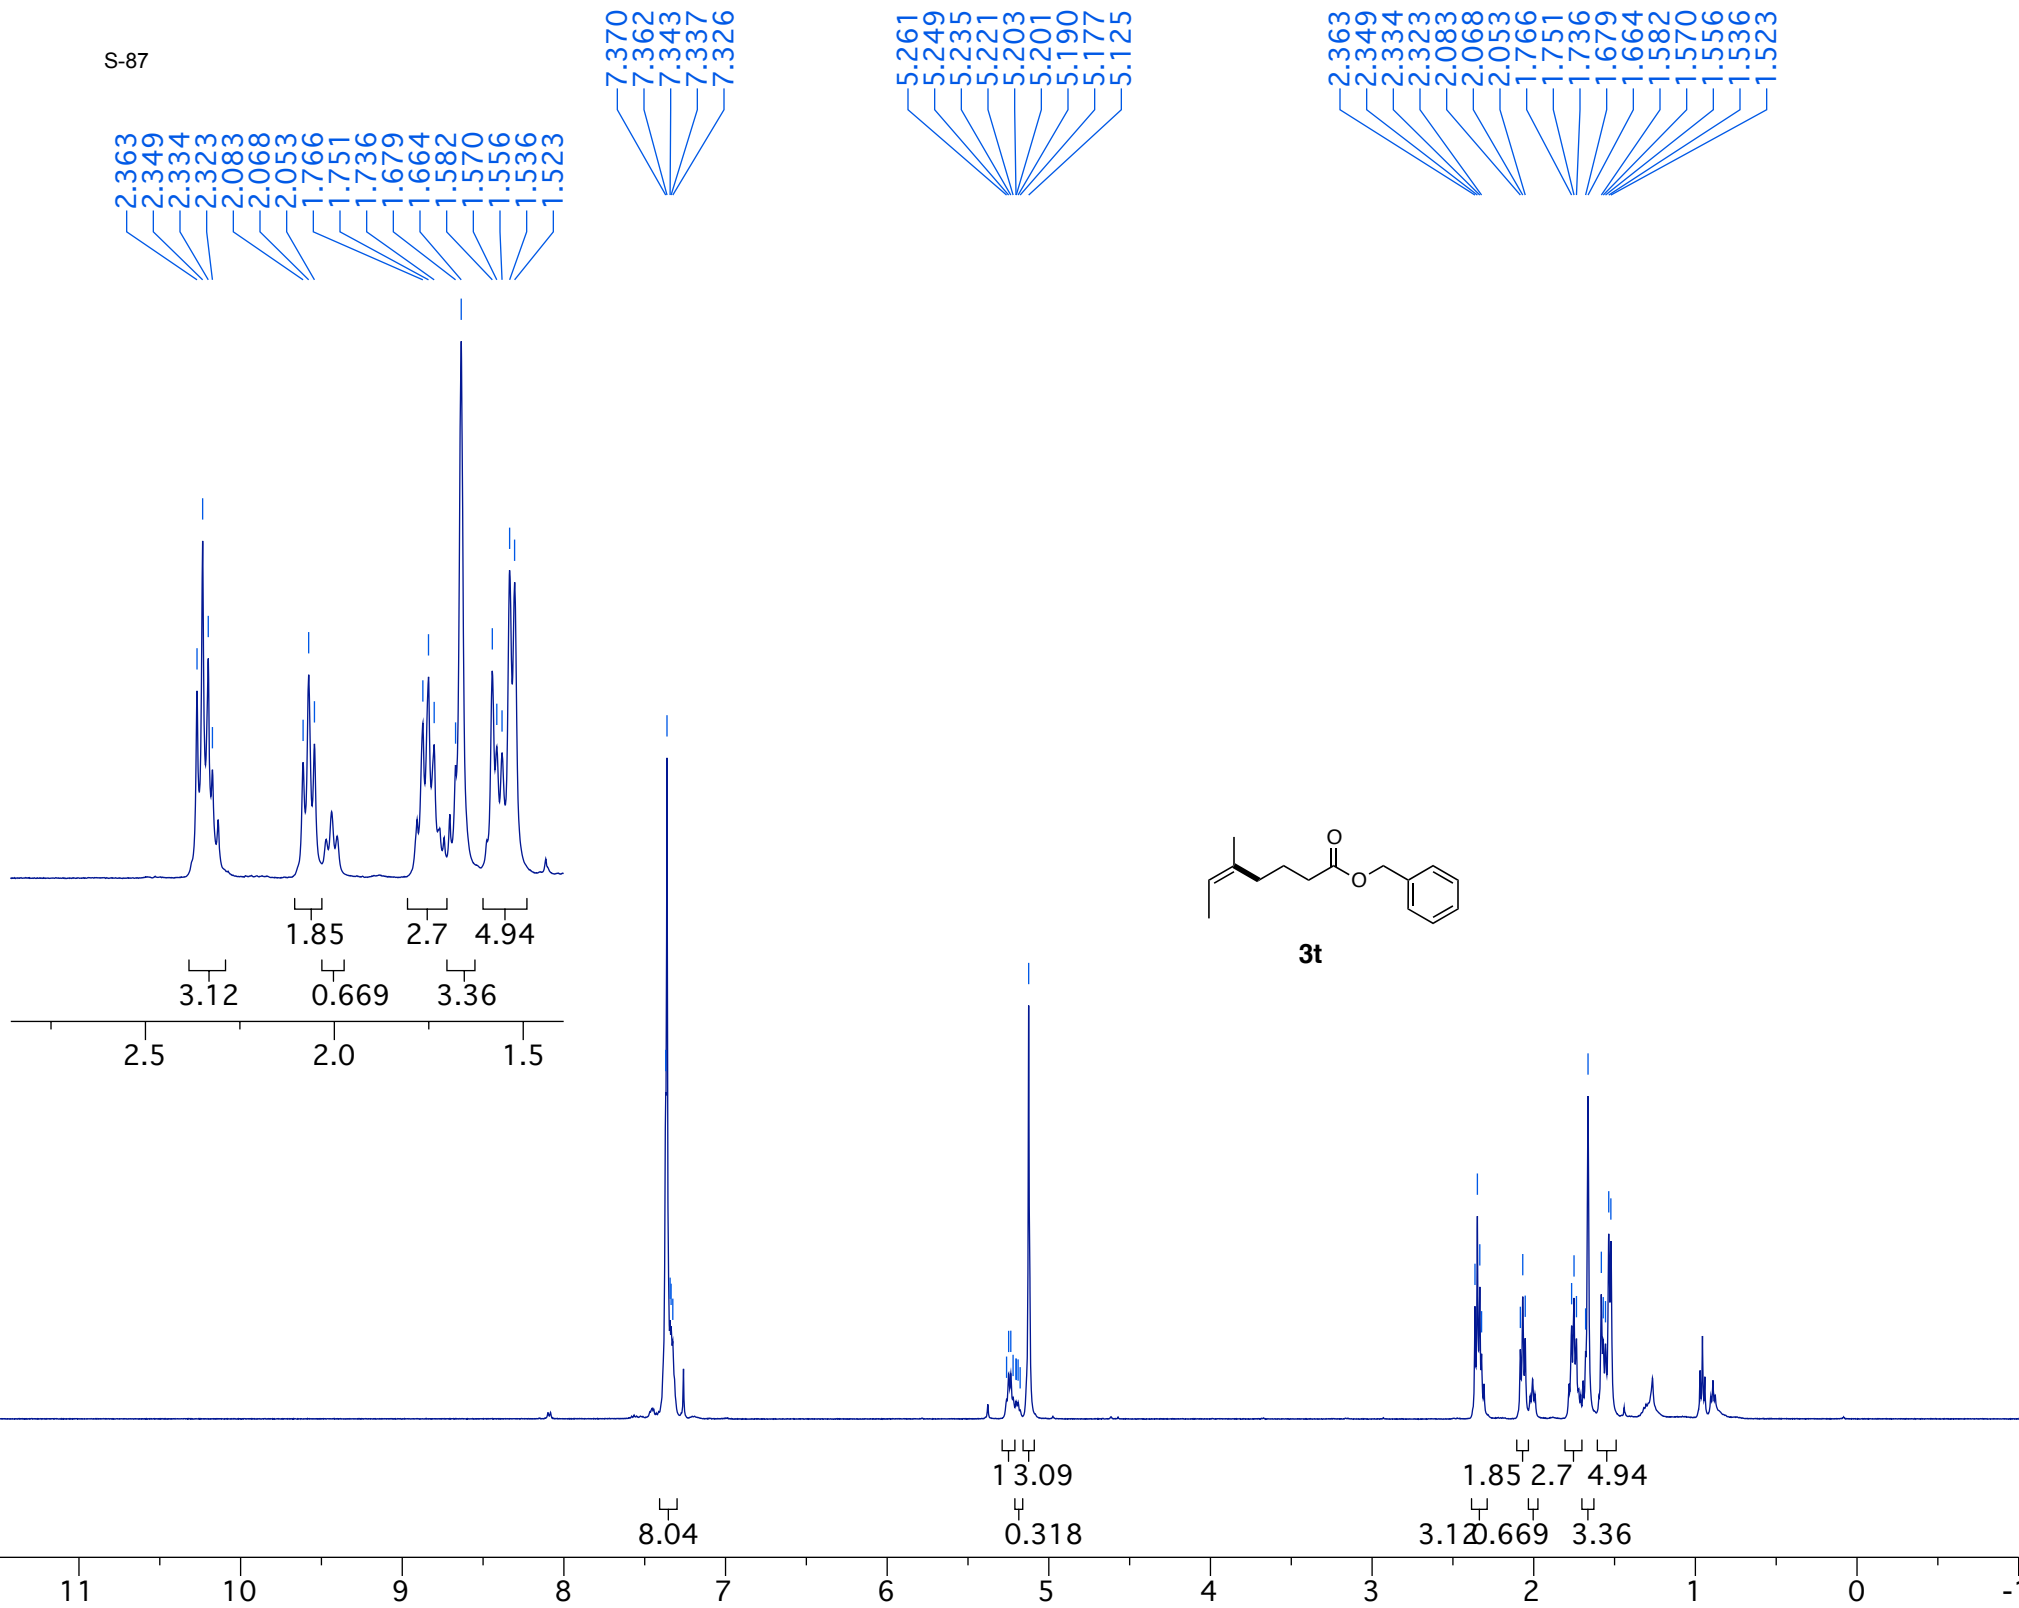

S-88

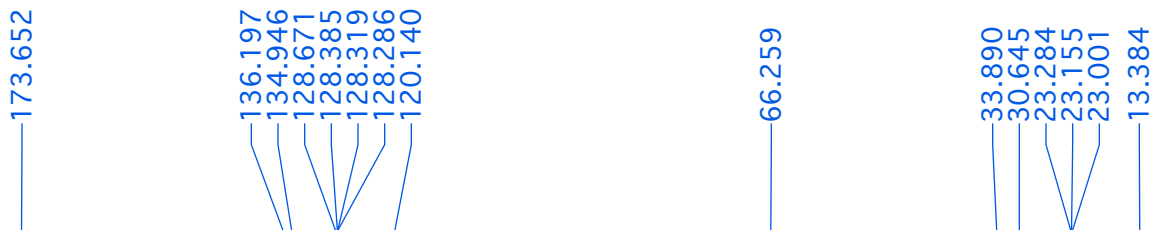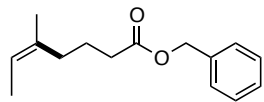

**3t**

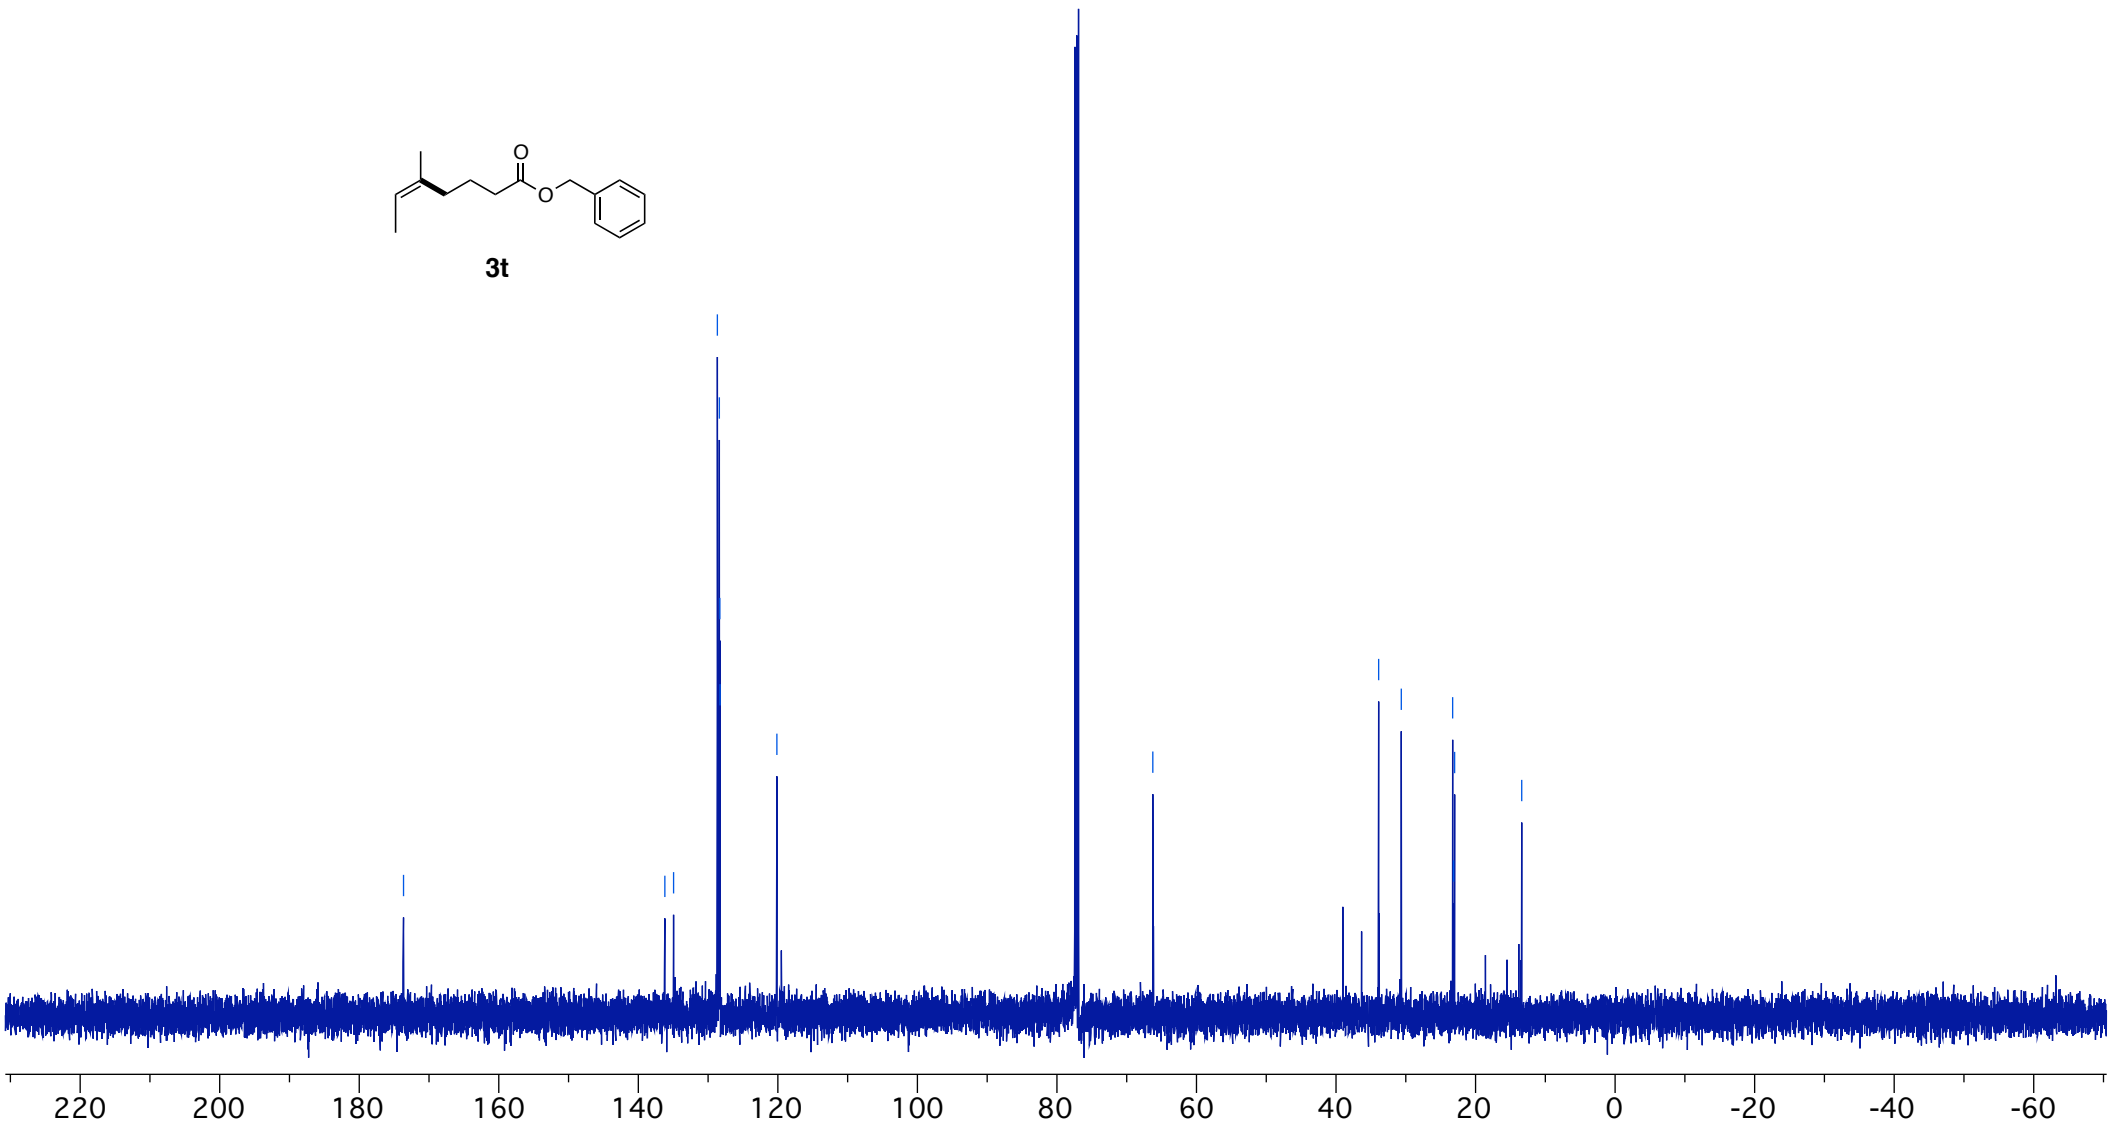



S-89

7.219  
7.213  
7.203  
7.201  
7.190  
7.186  
6.787  
6.772  
6.752  
6.740

4.153  
4.139  
4.124  
4.110  
3.794

2.651  
2.637  
2.621  
2.338  
2.323  
2.308  
1.991  
1.976  
1.961  
1.946  
1.931  
1.272  
1.258  
1.244

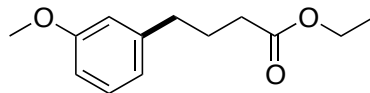

3u

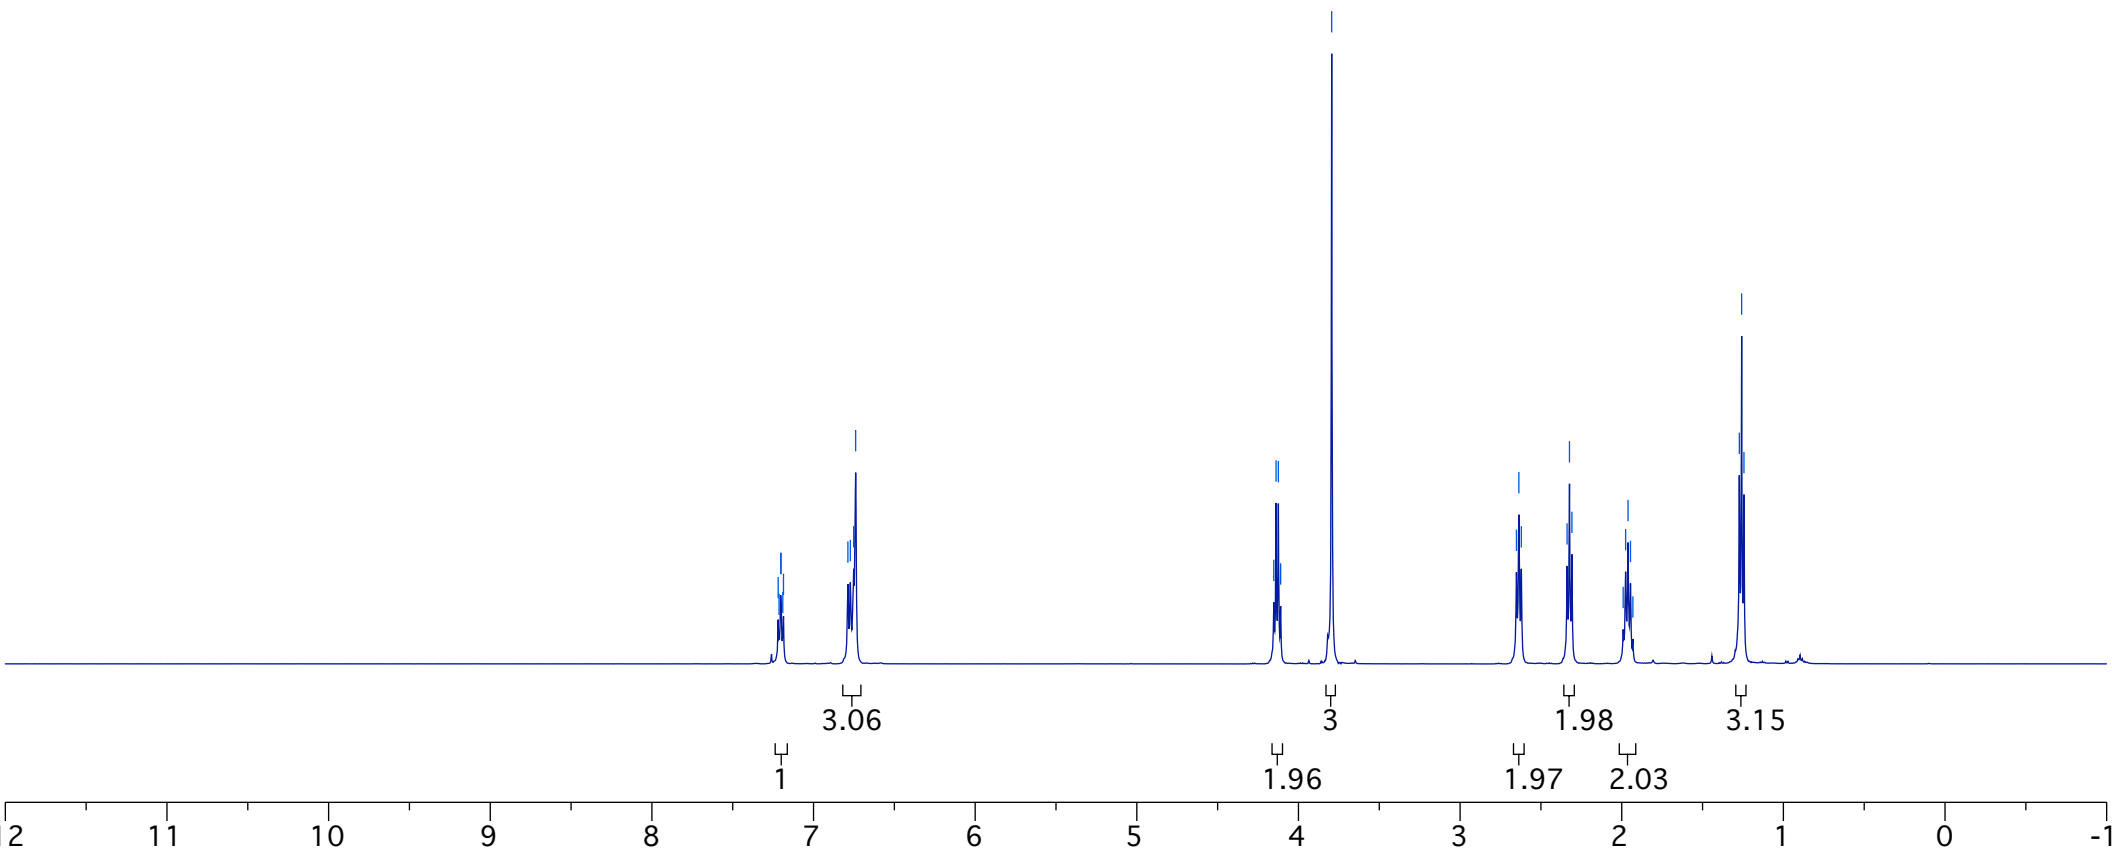

S-90

173.472

159.729

143.114

129.371

120.935

114.277

111.325

60.273

55.133

35.228

33.686

26.492

14.302

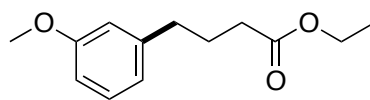

3u

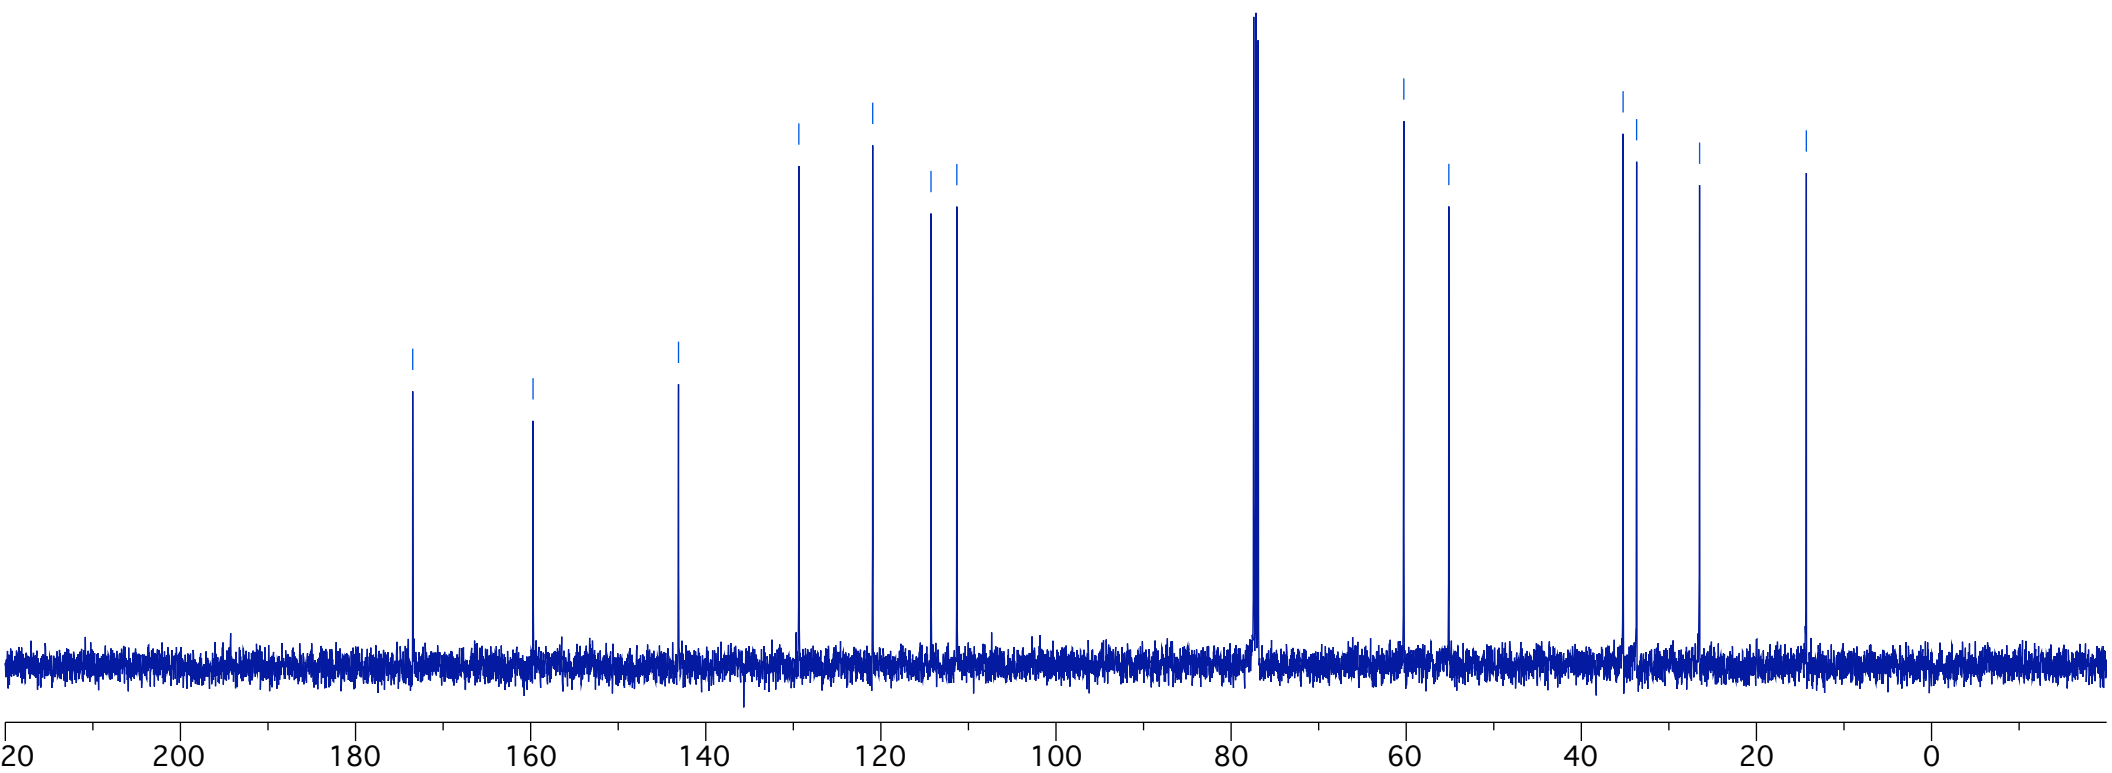

S-91

7.886  
7.883  
7.873  
7.865  
7.382  
7.378  
7.366  
7.351  
7.336

4.396  
4.382  
4.375  
4.368  
4.353  
4.149  
4.135  
4.121  
4.107  
2.721  
2.706  
2.691  
2.336  
2.321  
2.311  
2.306  
2.006  
1.991  
1.976  
1.968  
1.961  
1.946  
1.411  
1.397  
1.383  
1.271  
1.257  
1.242

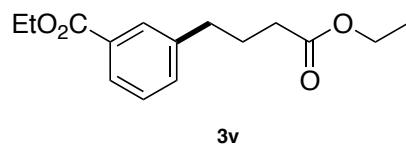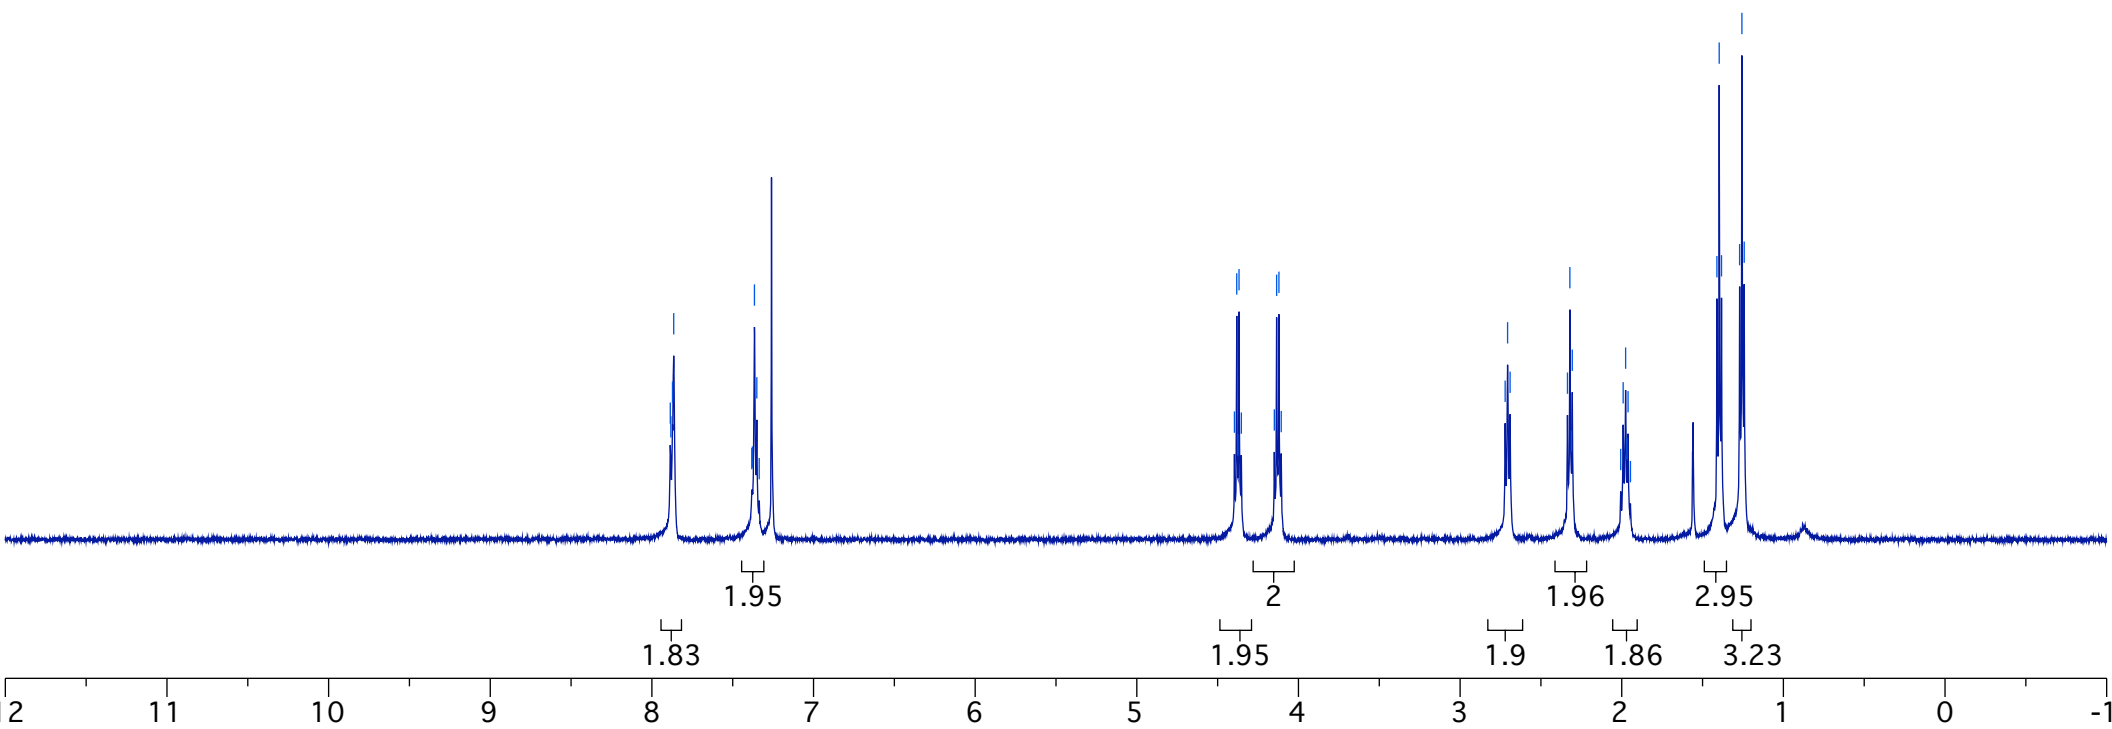

S-92

173.374

166.774

141.803

133.089

130.716

129.613

128.477

127.385

61.005

60.405

35.009

33.673

26.526

14.442

14.338

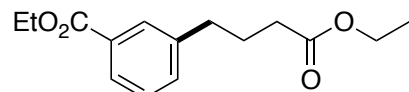

3v

20 200 180 160 140 120 100 80 60 40 20 0

S-93

7.285  
7.260  
7.191  
7.176

4.147  
4.133  
4.119  
4.105

2.670  
2.656  
2.640  
2.336  
2.321  
2.306  
1.990  
1.975  
1.960  
1.945  
1.930  
1.269  
1.254  
1.240

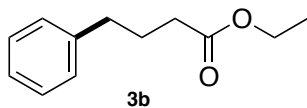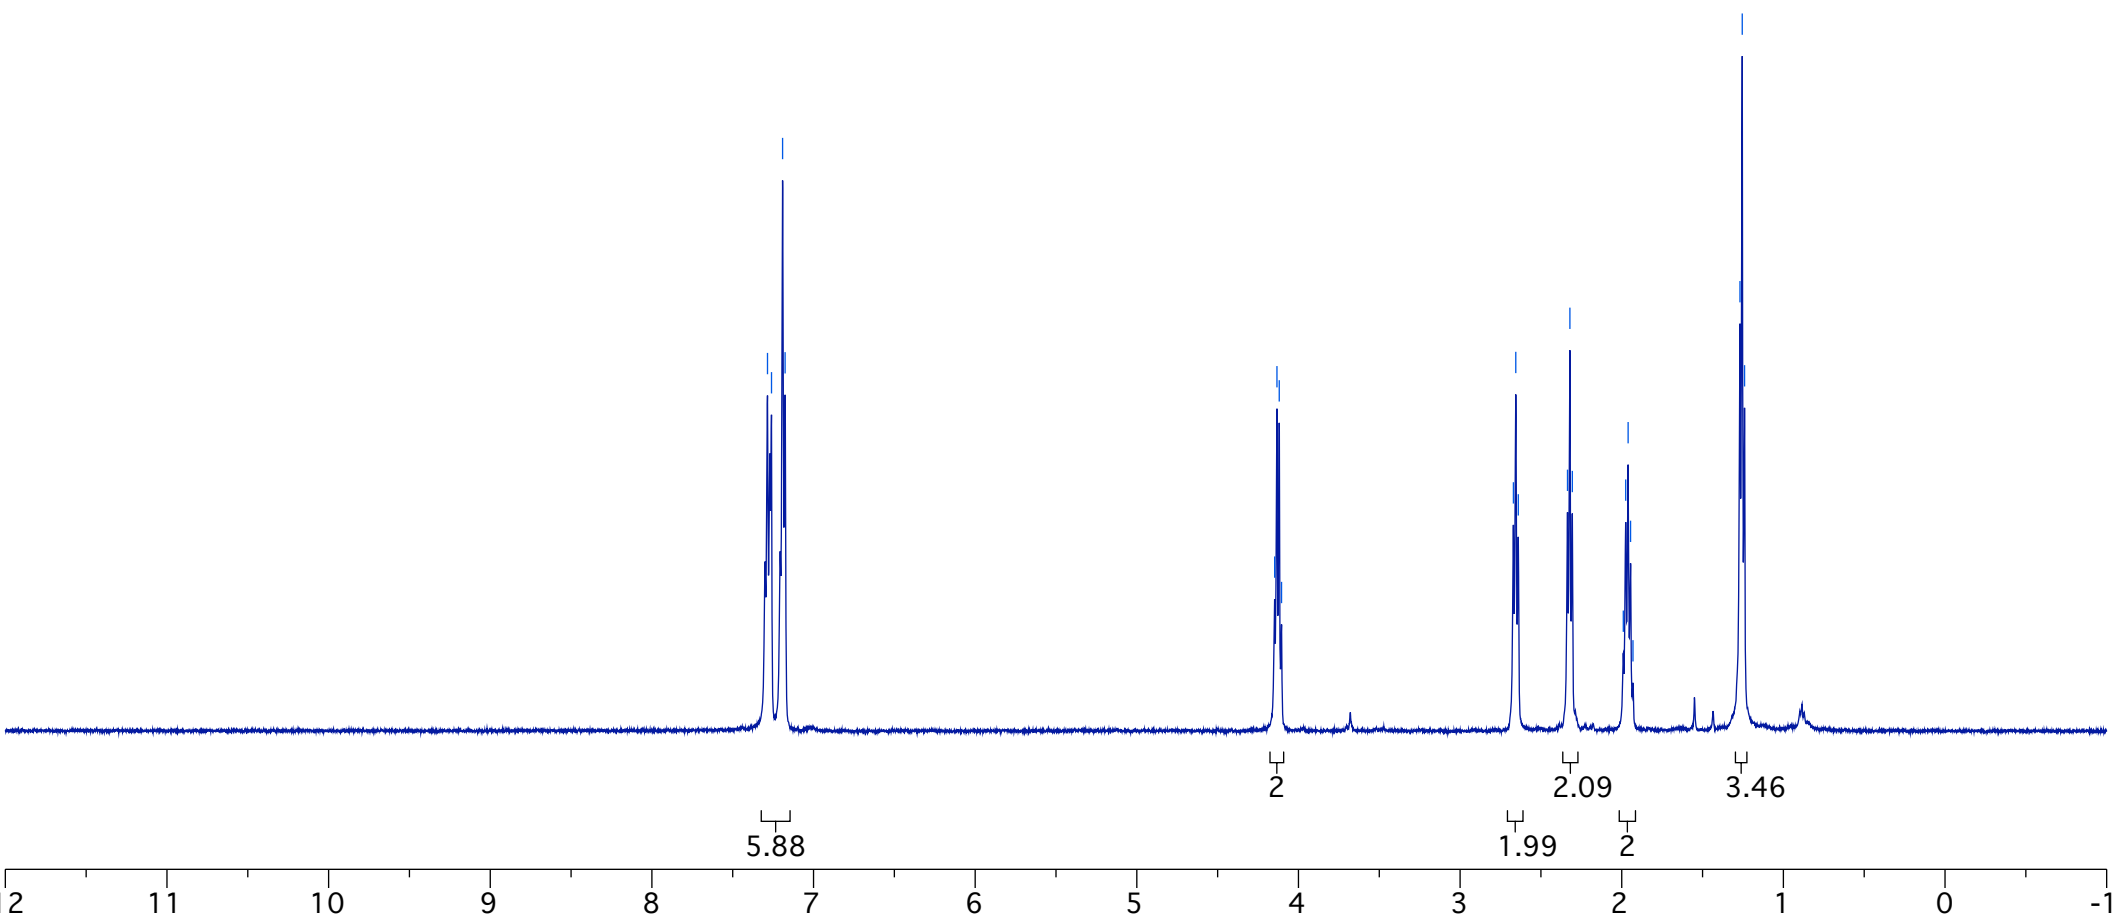

S-94

173.641

141.596

128.636

128.517

126.102

60.409

35.310

33.851

26.707

14.411

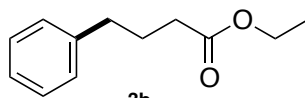

3b

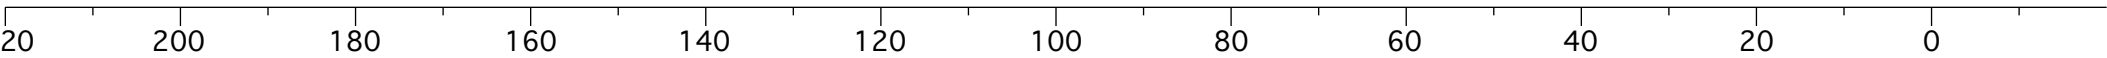

S-95

8.087  
8.071  
7.867  
7.851  
7.735  
7.719  
7.527  
7.524  
7.510  
7.495  
7.479  
7.465  
7.415  
7.401  
7.385  
7.332  
7.318

4.173  
4.159  
4.145  
4.130  
3.143  
3.128  
3.112  
2.433  
2.418  
2.403  
2.130  
2.116  
2.101  
2.085  
2.071  
1.284  
1.270  
1.256

8.087  
8.071  
7.867  
7.851  
7.735  
7.719  
7.527  
7.524  
7.510  
7.495  
7.479  
7.465  
7.415  
7.401  
7.385  
7.332  
7.318

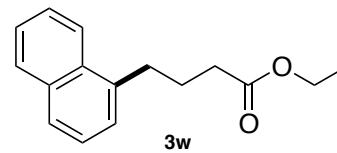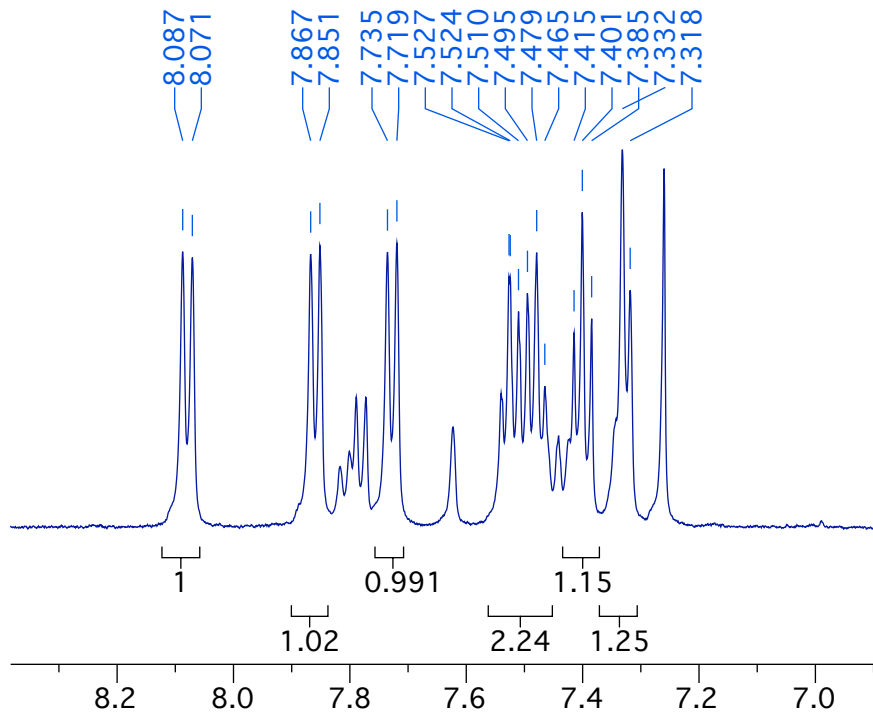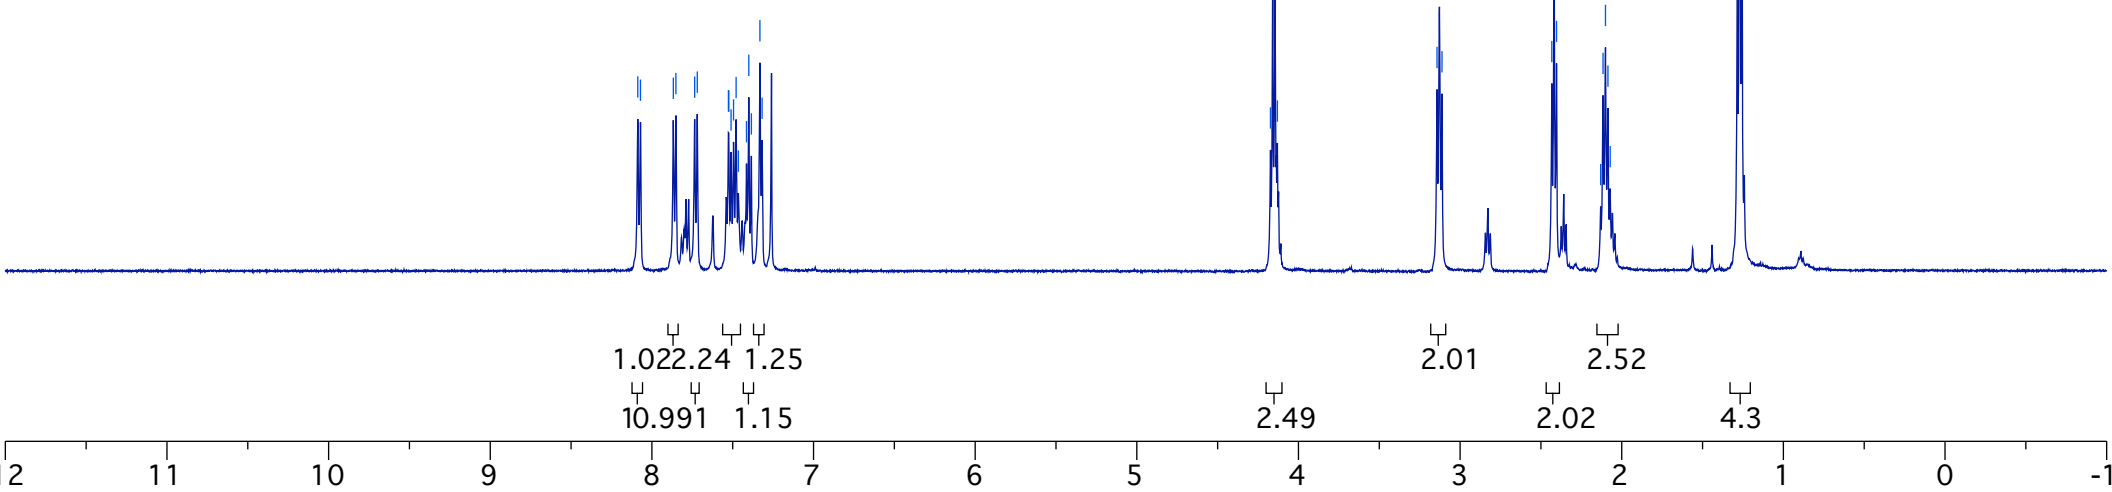

1.02  
2.24  
1.15

2.01  
2.52

4.3

S-96

173.614

137.737  
134.050  
131.978  
128.896  
126.952  
126.337  
125.987  
125.625  
123.929

60.467

34.164  
32.520

26.014

14.417

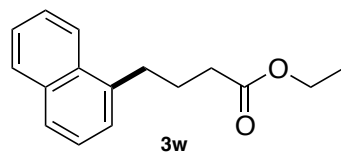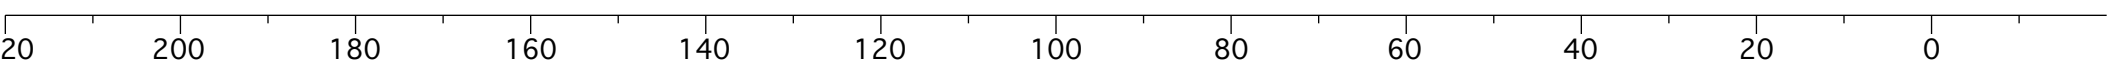



S-97

7.546  
7.530  
7.301  
7.285

4.151  
4.137  
4.122  
4.108

2.729  
2.714  
2.698  
2.337  
2.322  
2.308  
2.001  
1.986  
1.971  
1.956  
1.941  
1.270  
1.255  
1.241

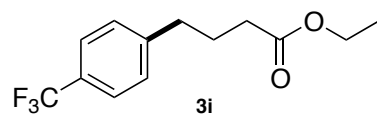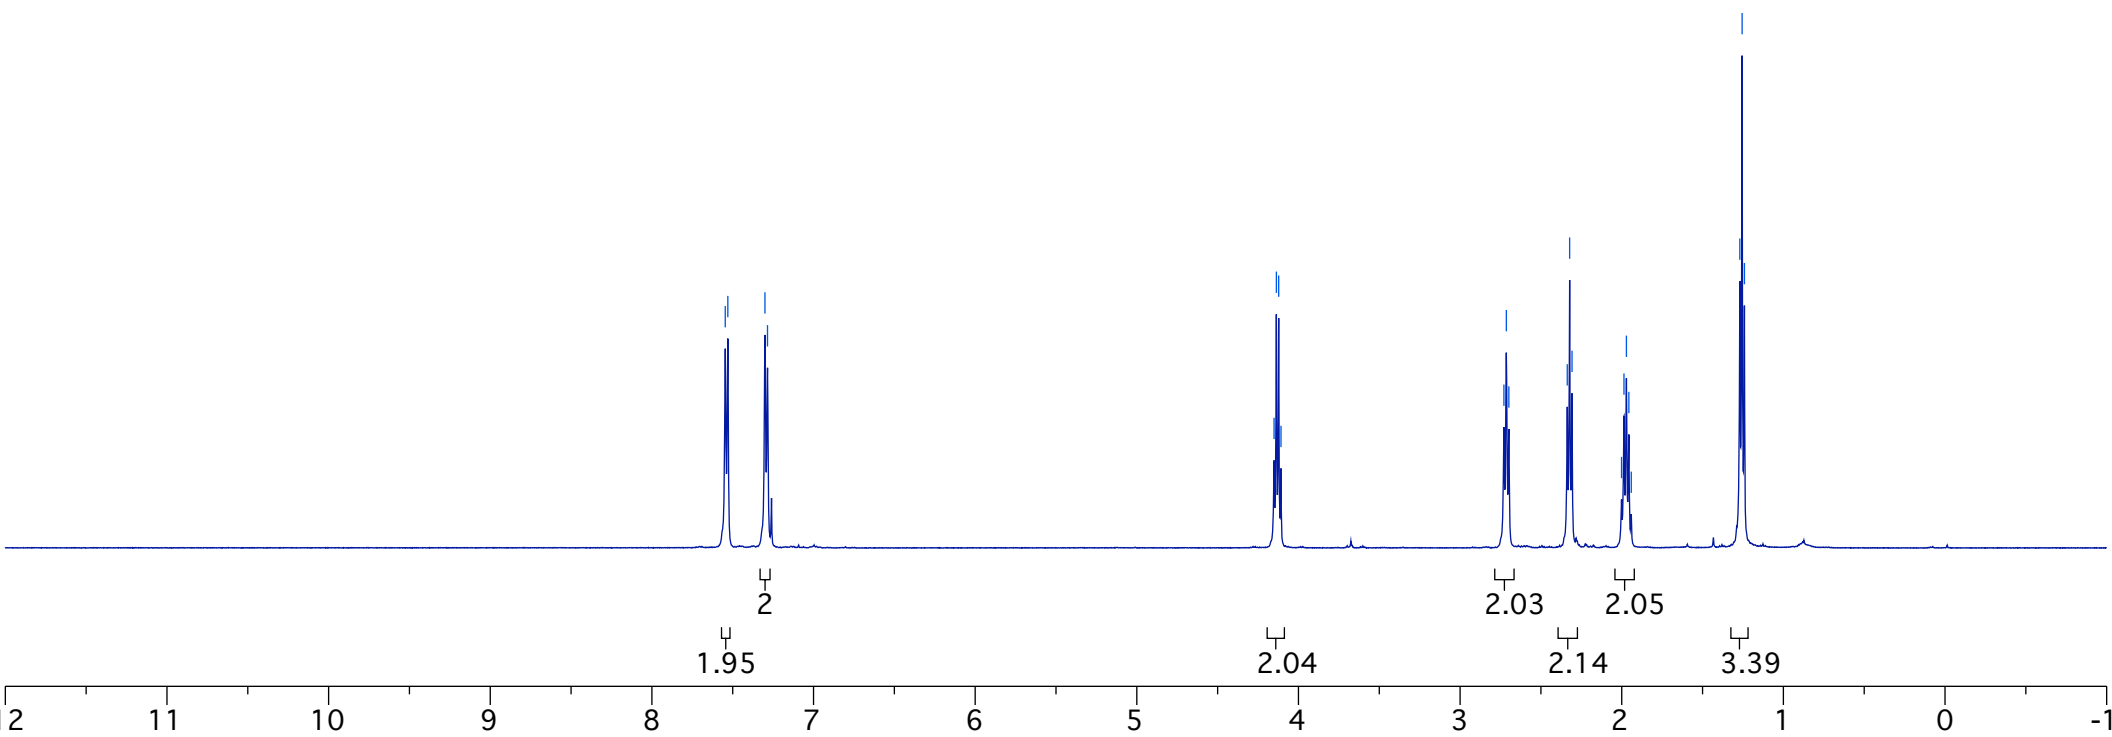

S-98

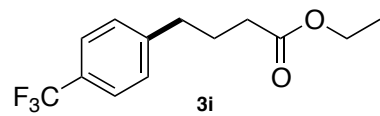

173.329

145.708

128.931

128.682

128.425

125.505

125.476

125.447

125.413

60.520

35.071

33.638

26.359

14.374

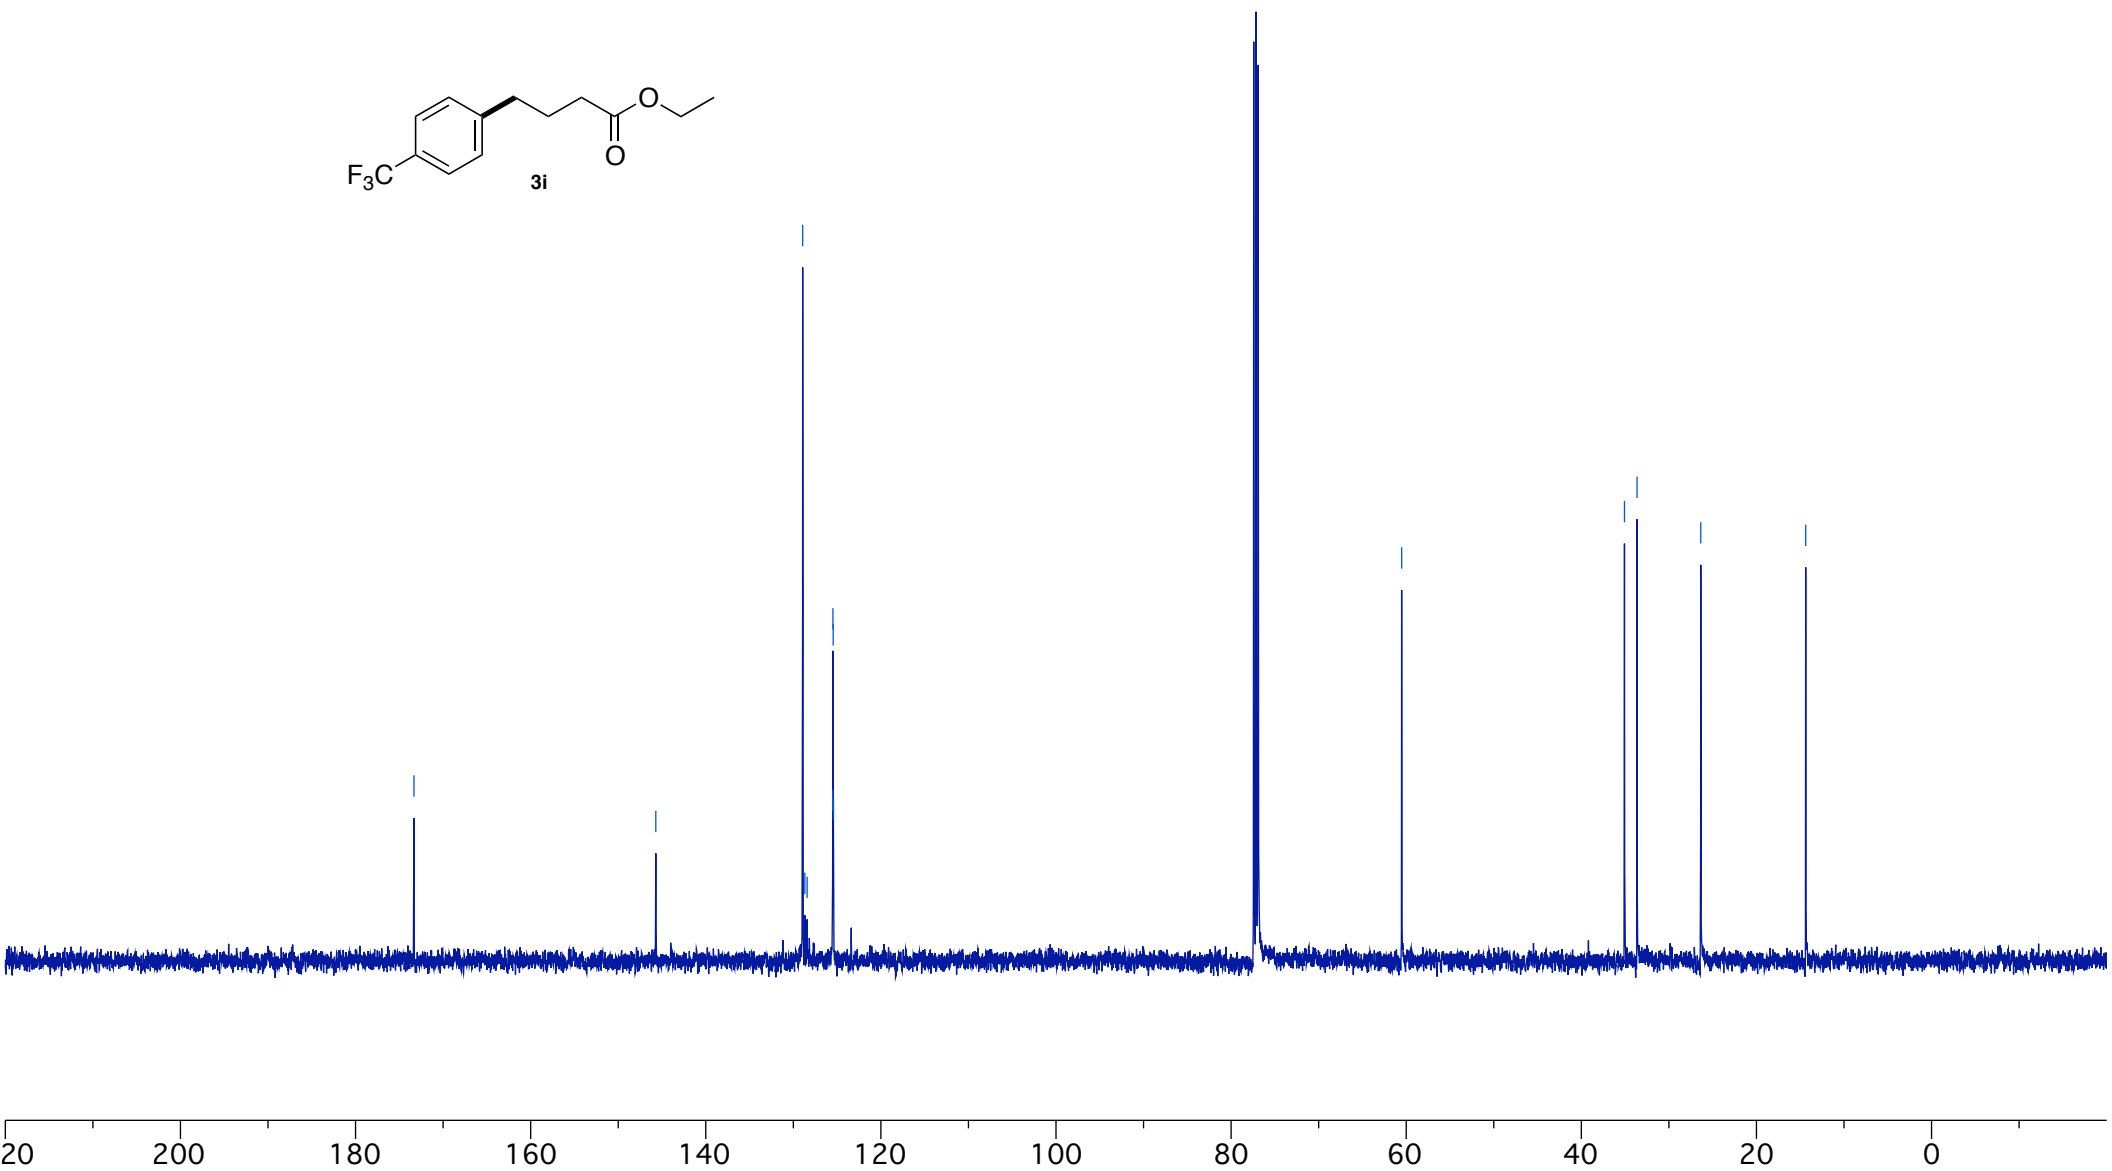



0.492

S-100

7.890  
7.873

7.277  
7.260

4.144  
4.130  
4.116  
4.101

2.724  
2.709  
2.693  
2.577  
2.330  
2.316  
2.301  
1.998  
1.983  
1.968  
1.953  
1.938  
1.263  
1.249  
1.234

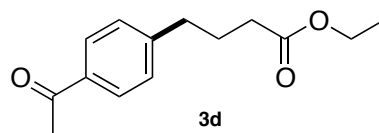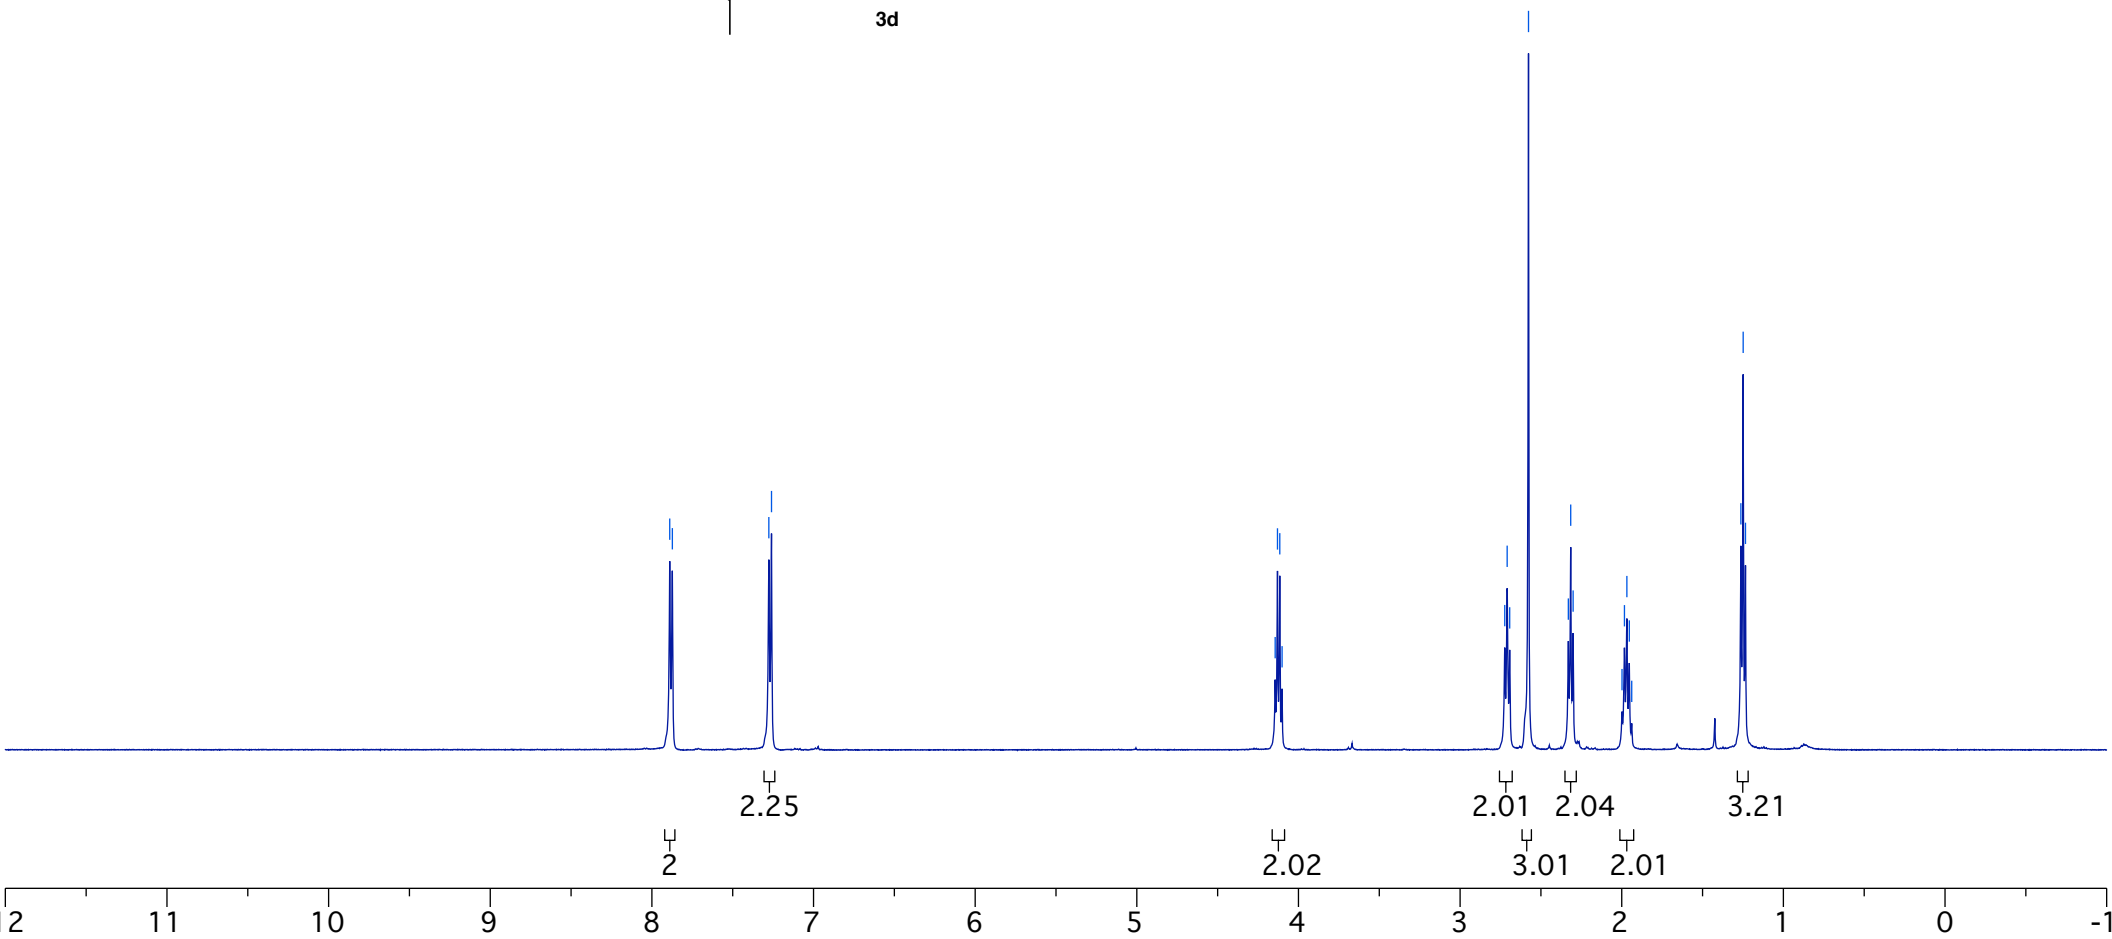

197.893<sup>9</sup><sub>101</sub>

173.334

147.372

135.385

128.820

128.705

60.490

35.232

33.668

26.690

26.277

14.381

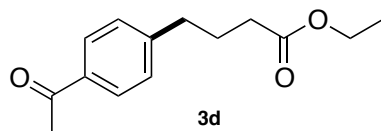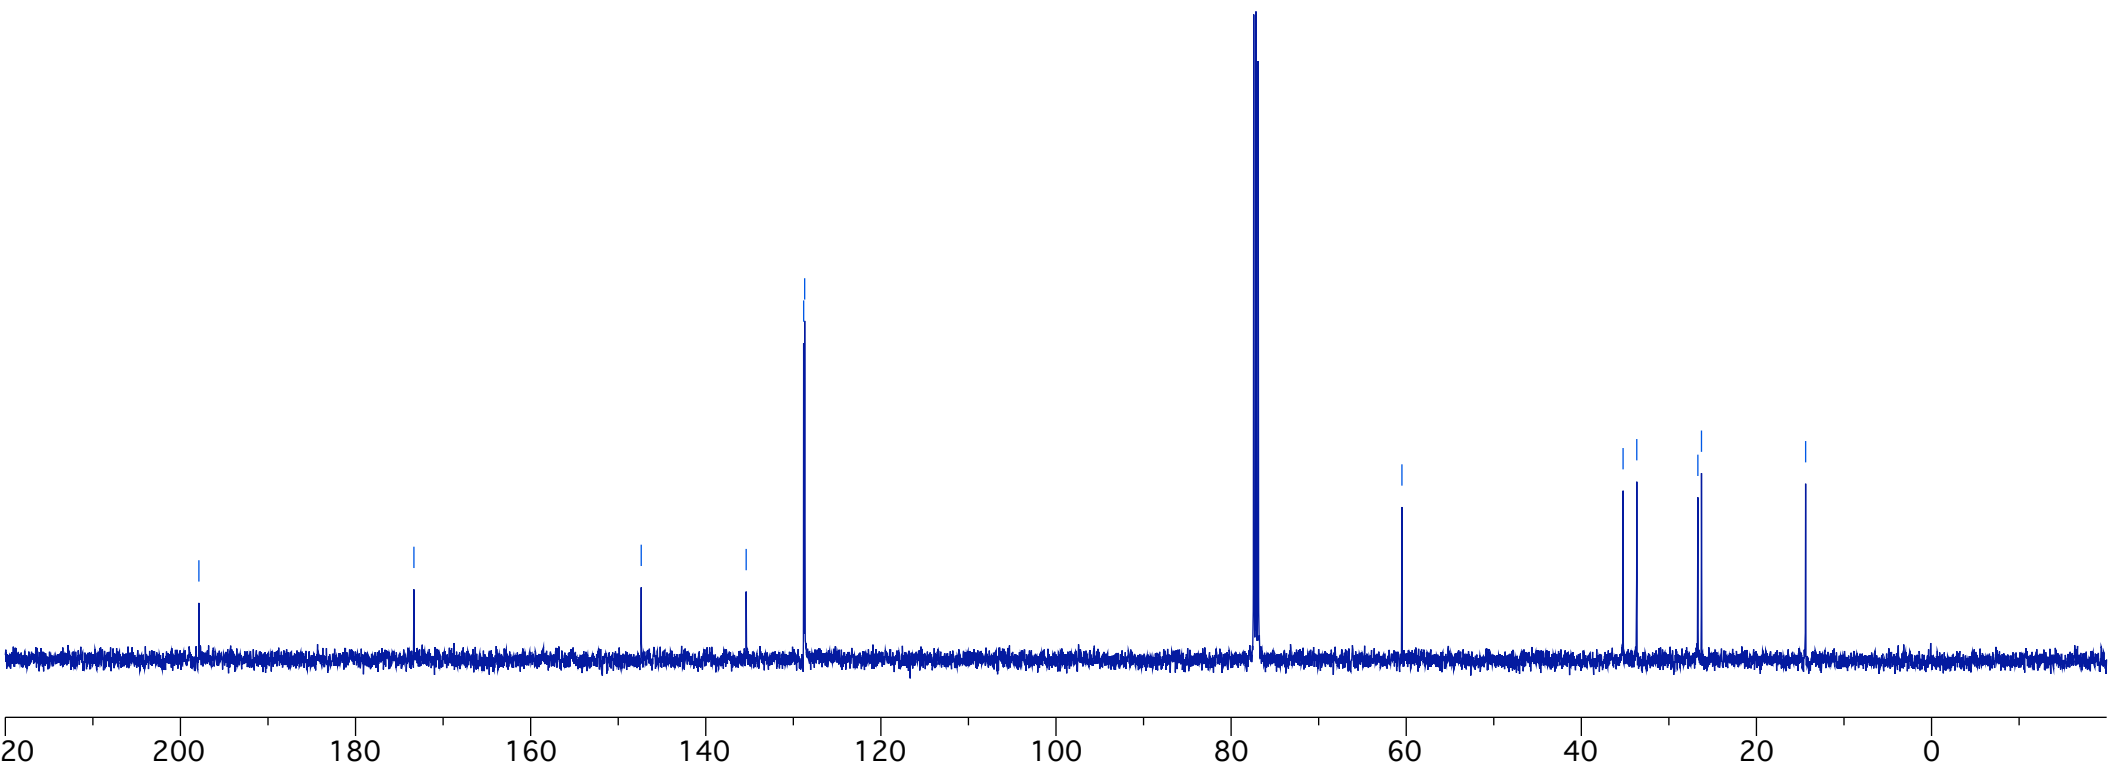

S-102

7.576  
7.559  
7.289  
7.273

4.143  
4.128  
4.114  
4.100

2.723  
2.708  
2.692  
2.327  
2.312  
2.298  
1.982  
1.967  
1.952  
1.937  
1.922  
1.262  
1.247  
1.233

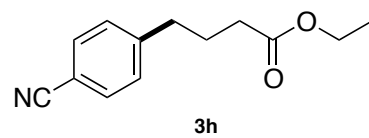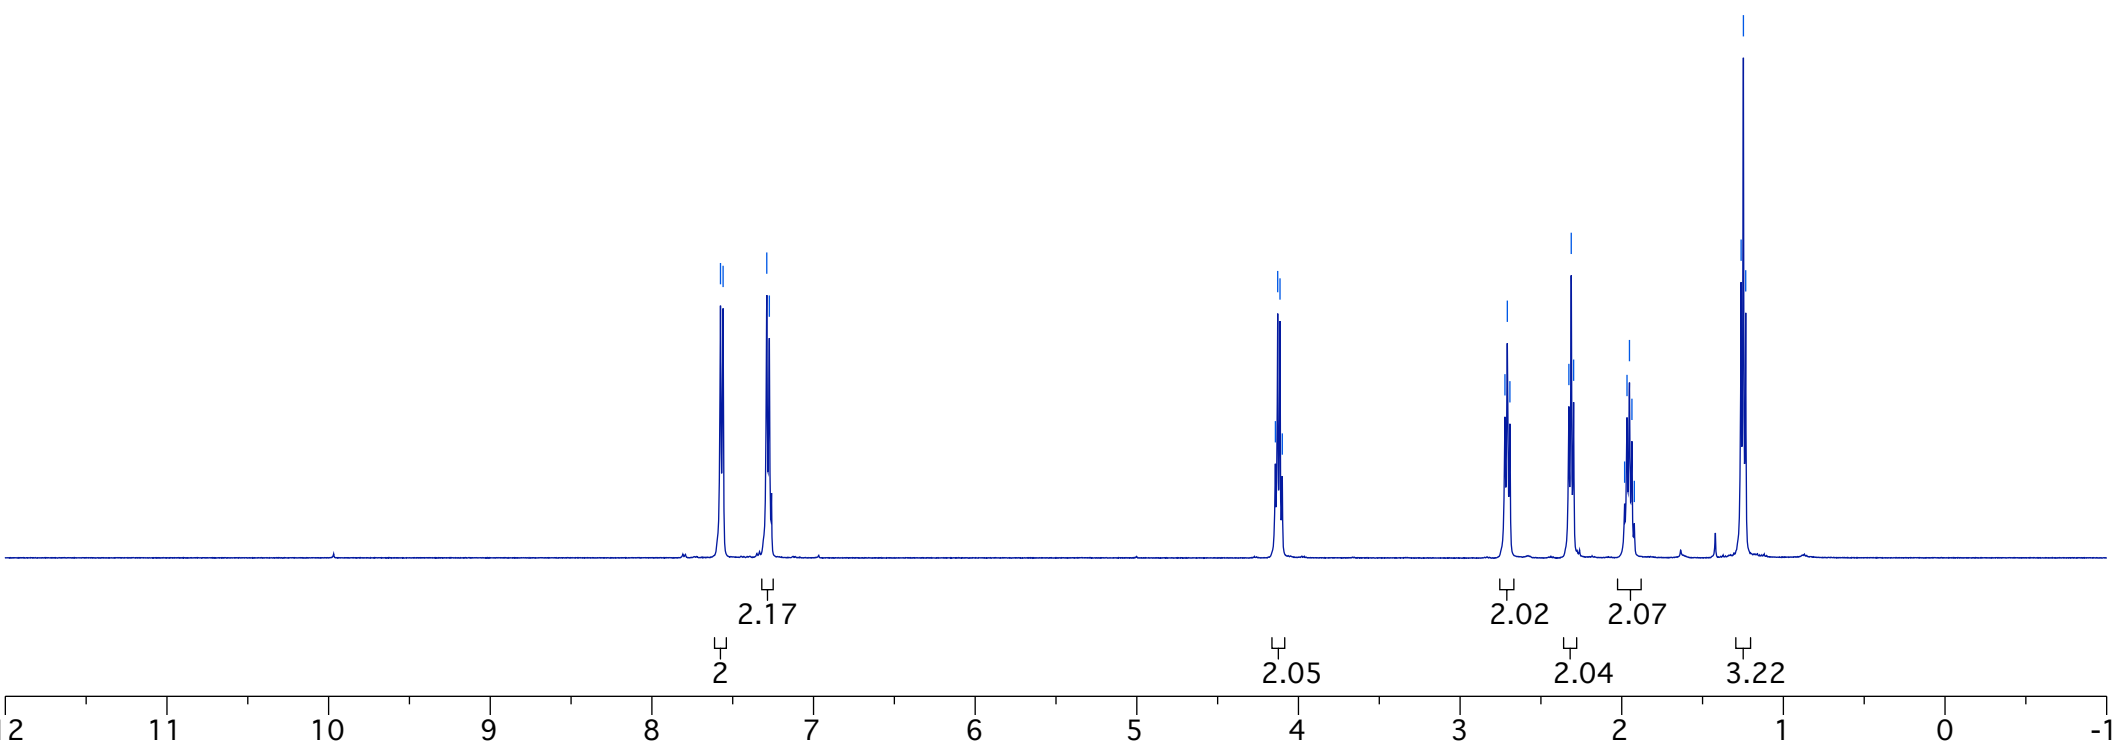

S-103

173.129

147.238

132.355  
129.388

119.113

110.085

60.546

35.326  
33.538

26.113

14.358

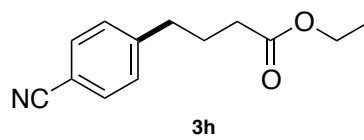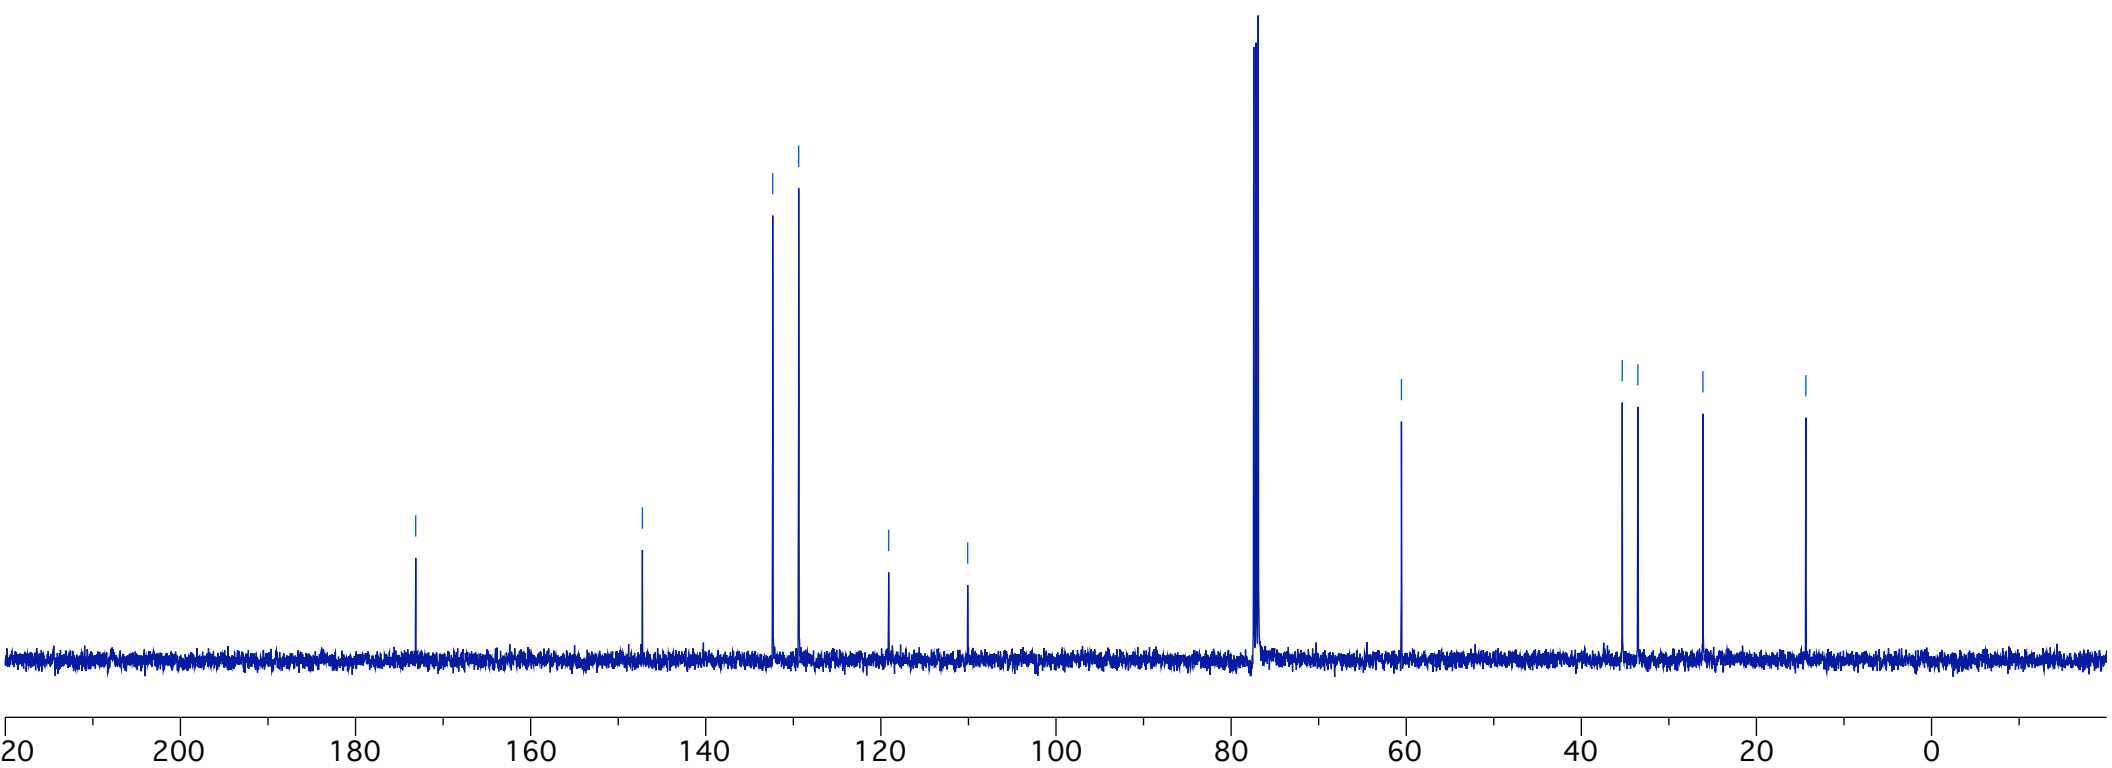

S-104

7.868  
7.851

7.391  
7.375

4.156  
4.142  
4.128  
4.113

3.044  
2.765  
2.750  
2.734  
2.345  
2.331  
2.316  
2.008  
1.993  
1.978  
1.963  
1.948  
1.274  
1.259  
1.245

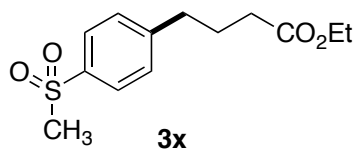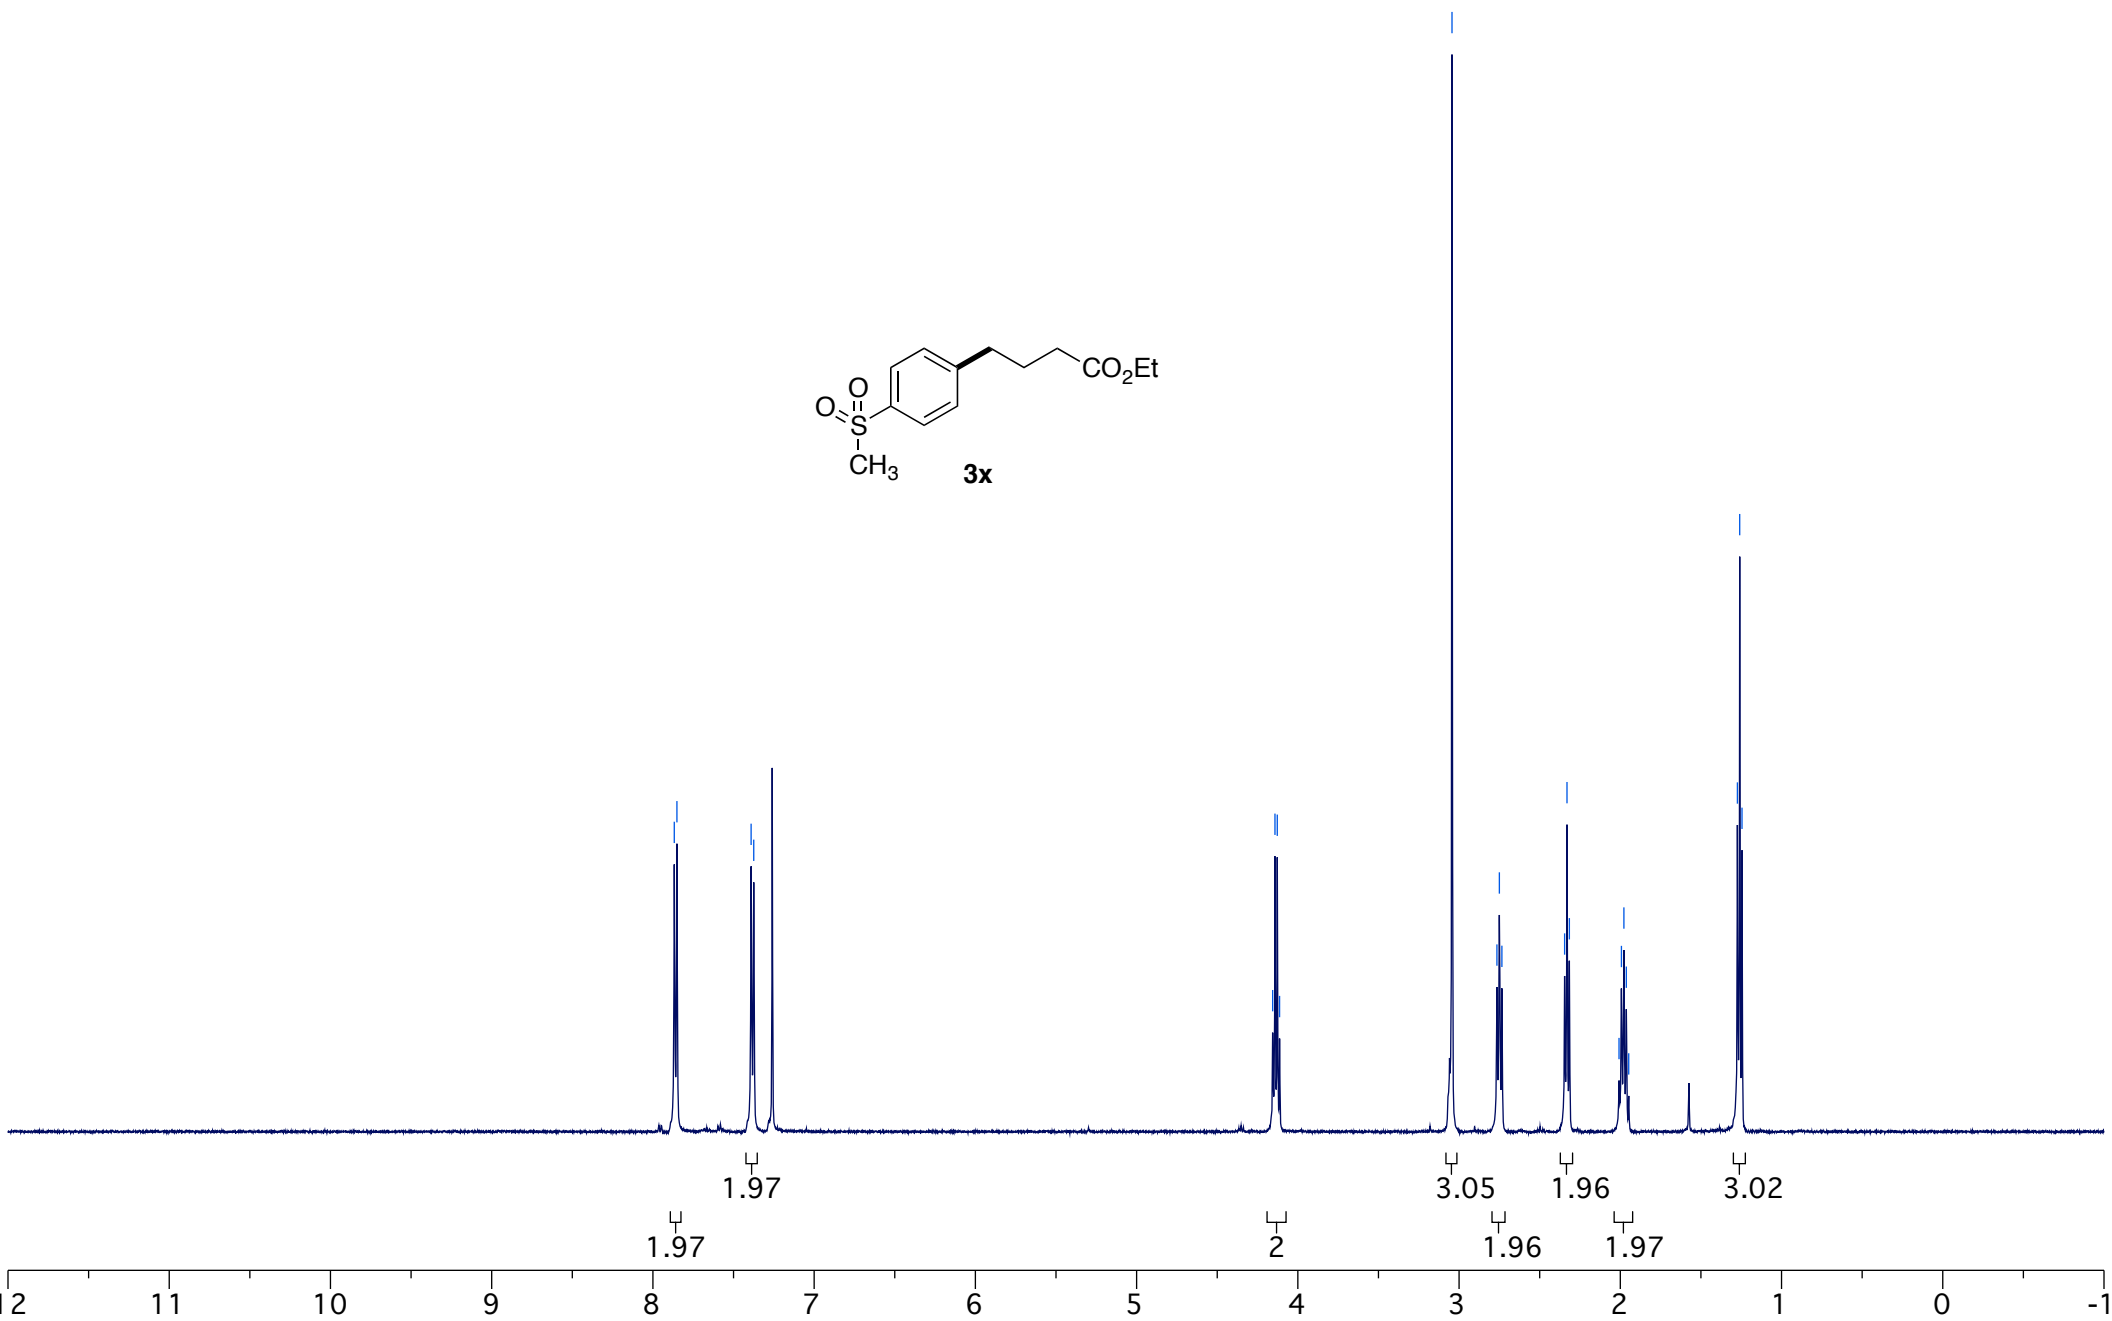



S-105

173.093  
148.157  
138.340  
129.479  
127.572  
60.470  
44.599  
35.031  
33.461  
26.140  
14.288

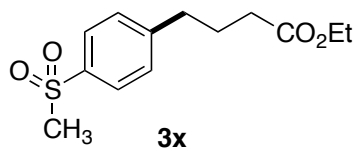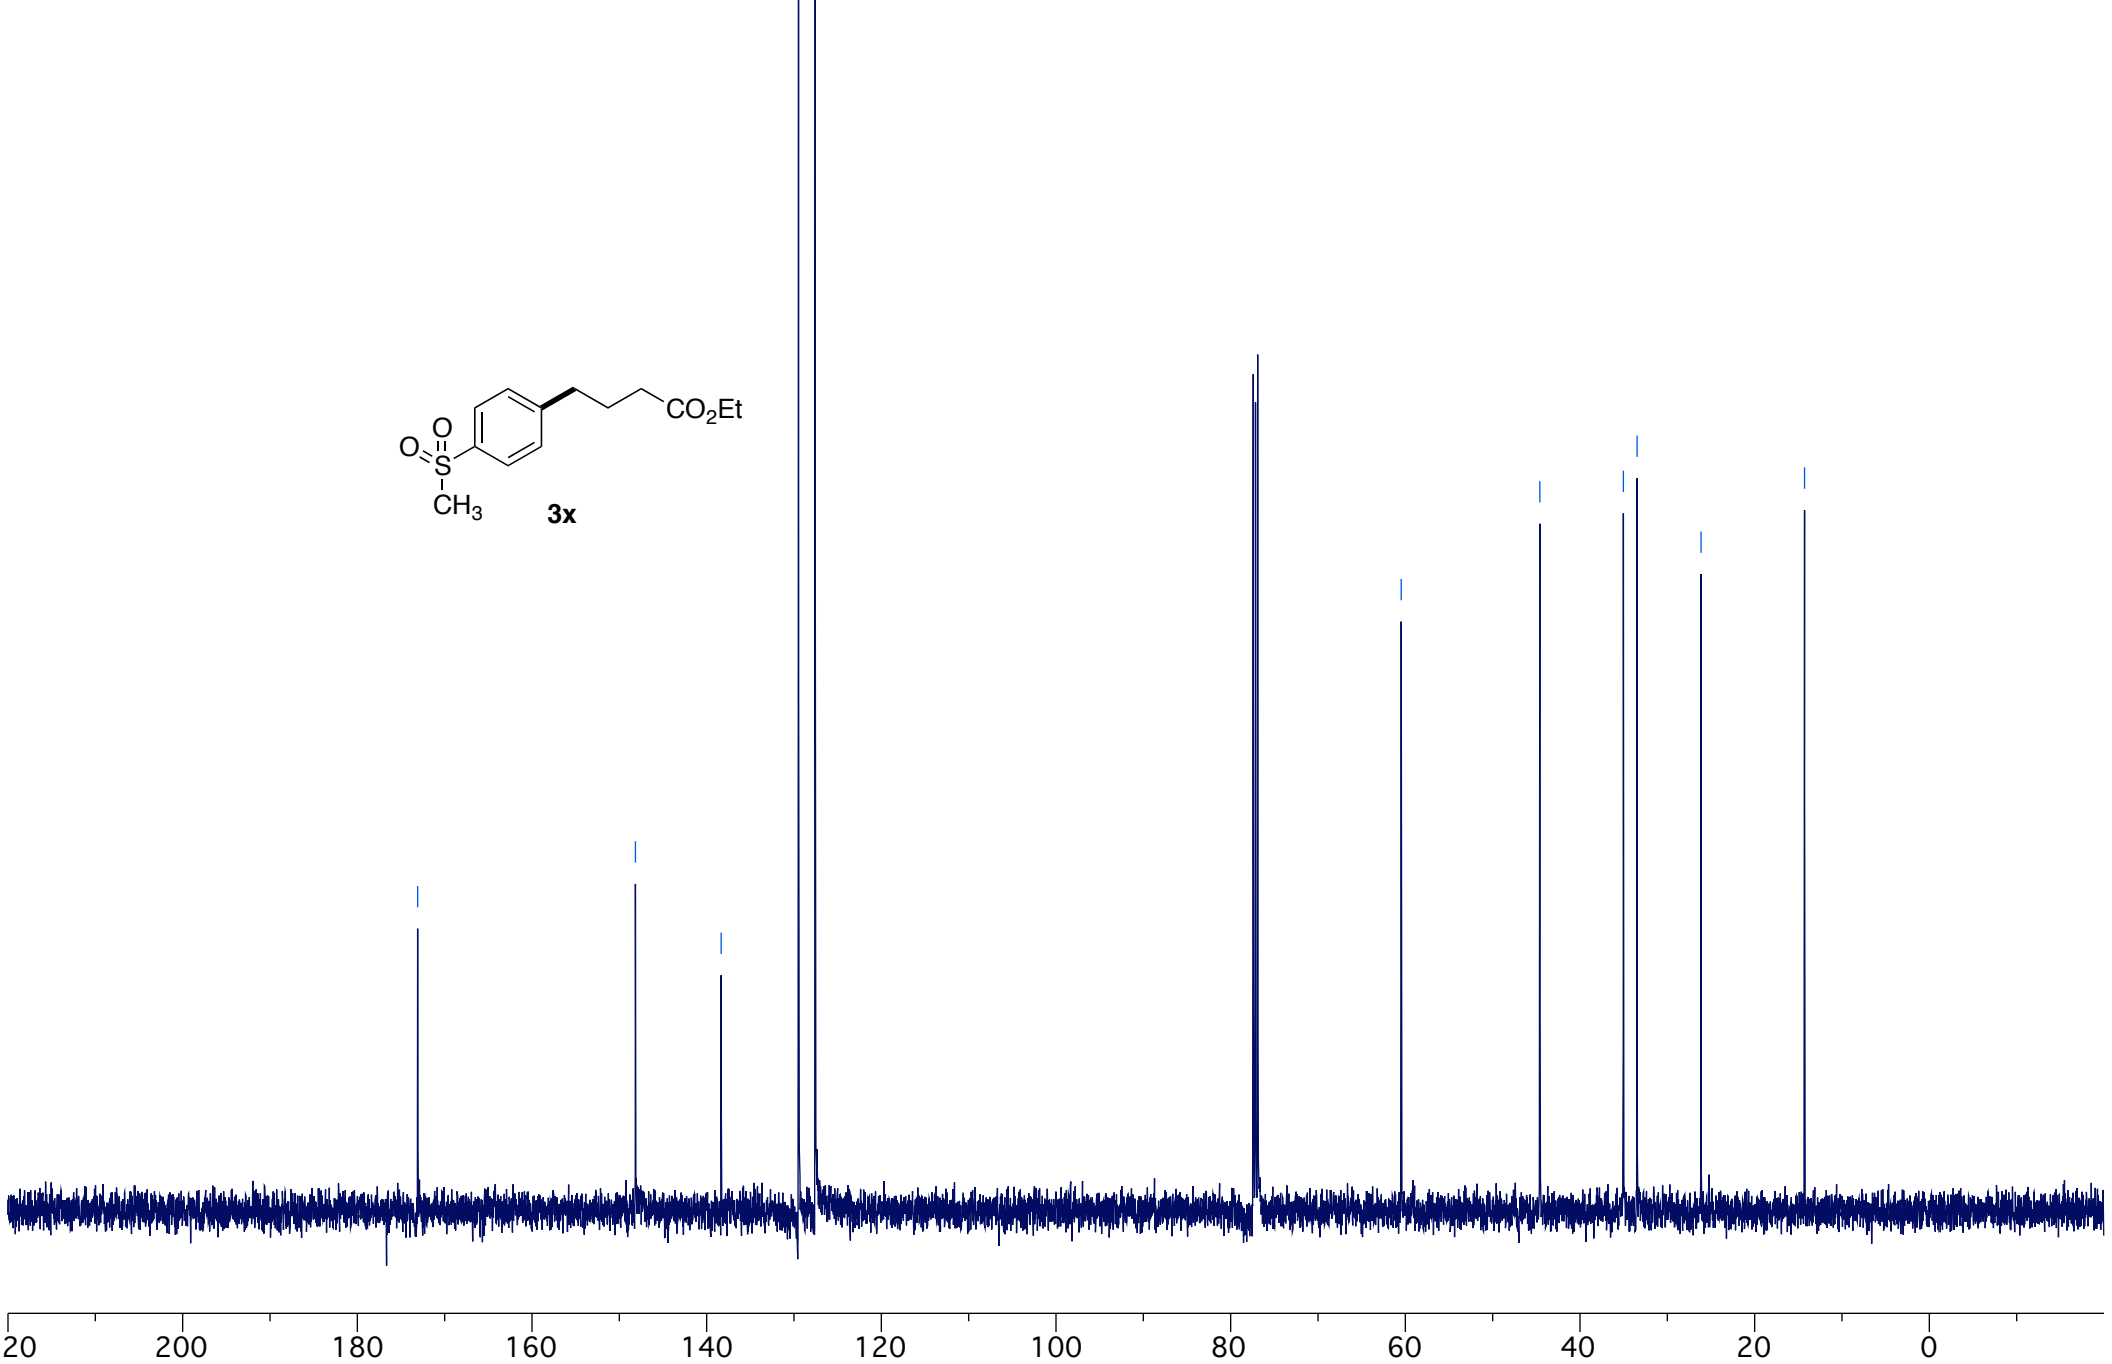

S-106

7.878  
7.777  
7.761  
7.513  
7.497

4.164  
4.150  
4.135  
4.121

2.977  
2.961  
2.946  
2.408  
2.393  
2.379  
2.062  
2.047  
2.031  
2.016  
2.001  
1.279  
1.265  
1.250

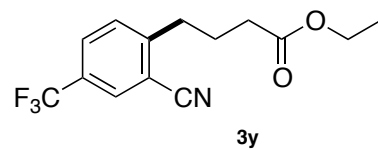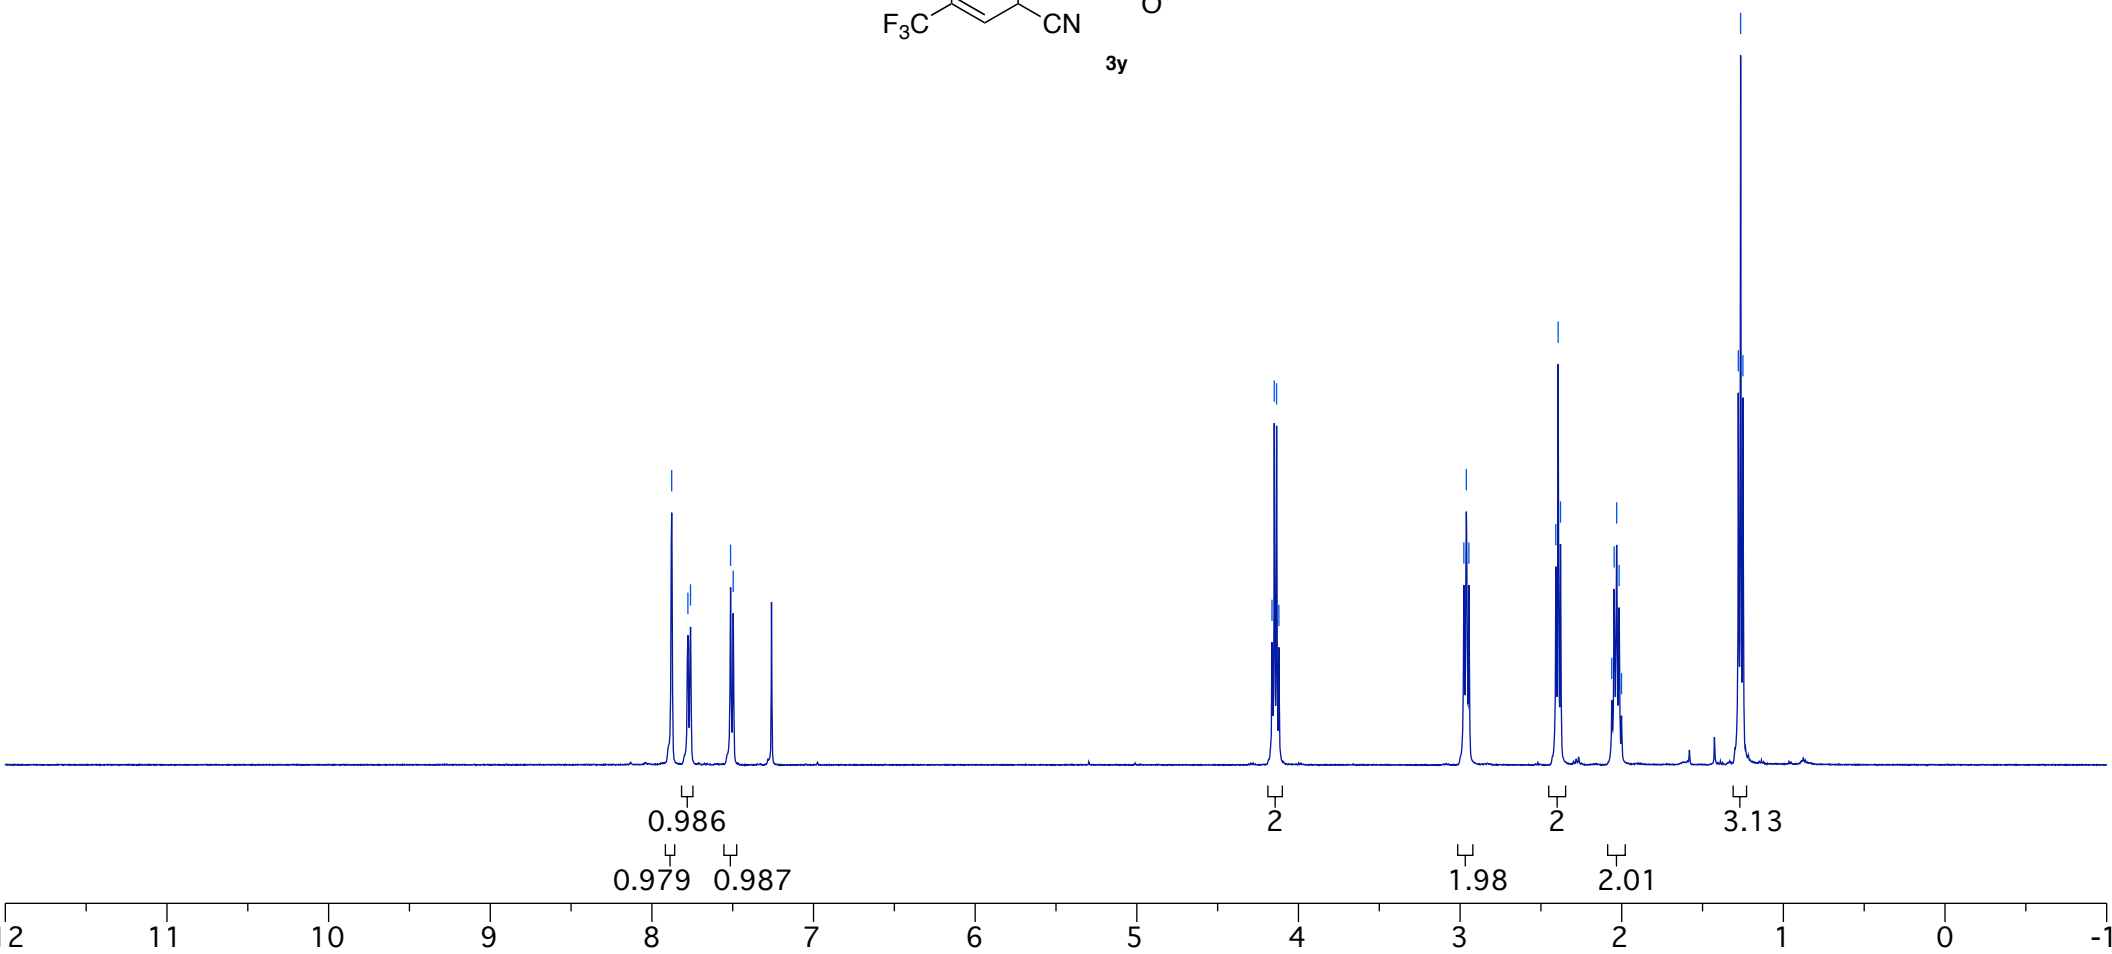

S-107

DAE5P020 15-30

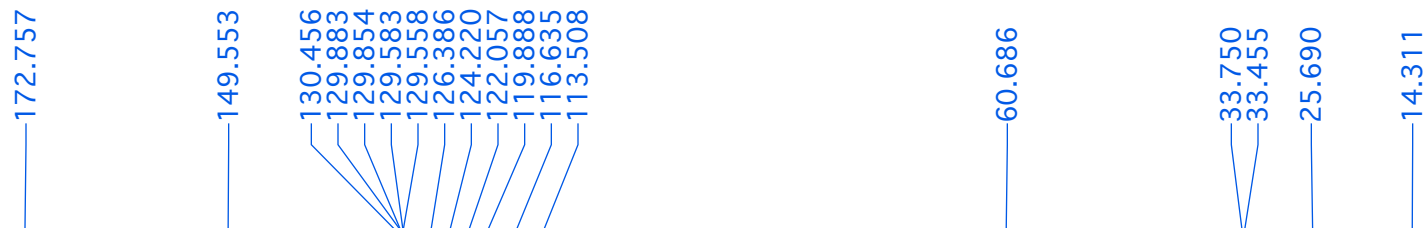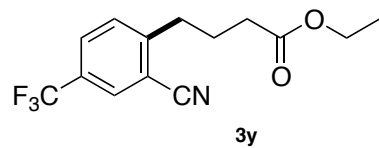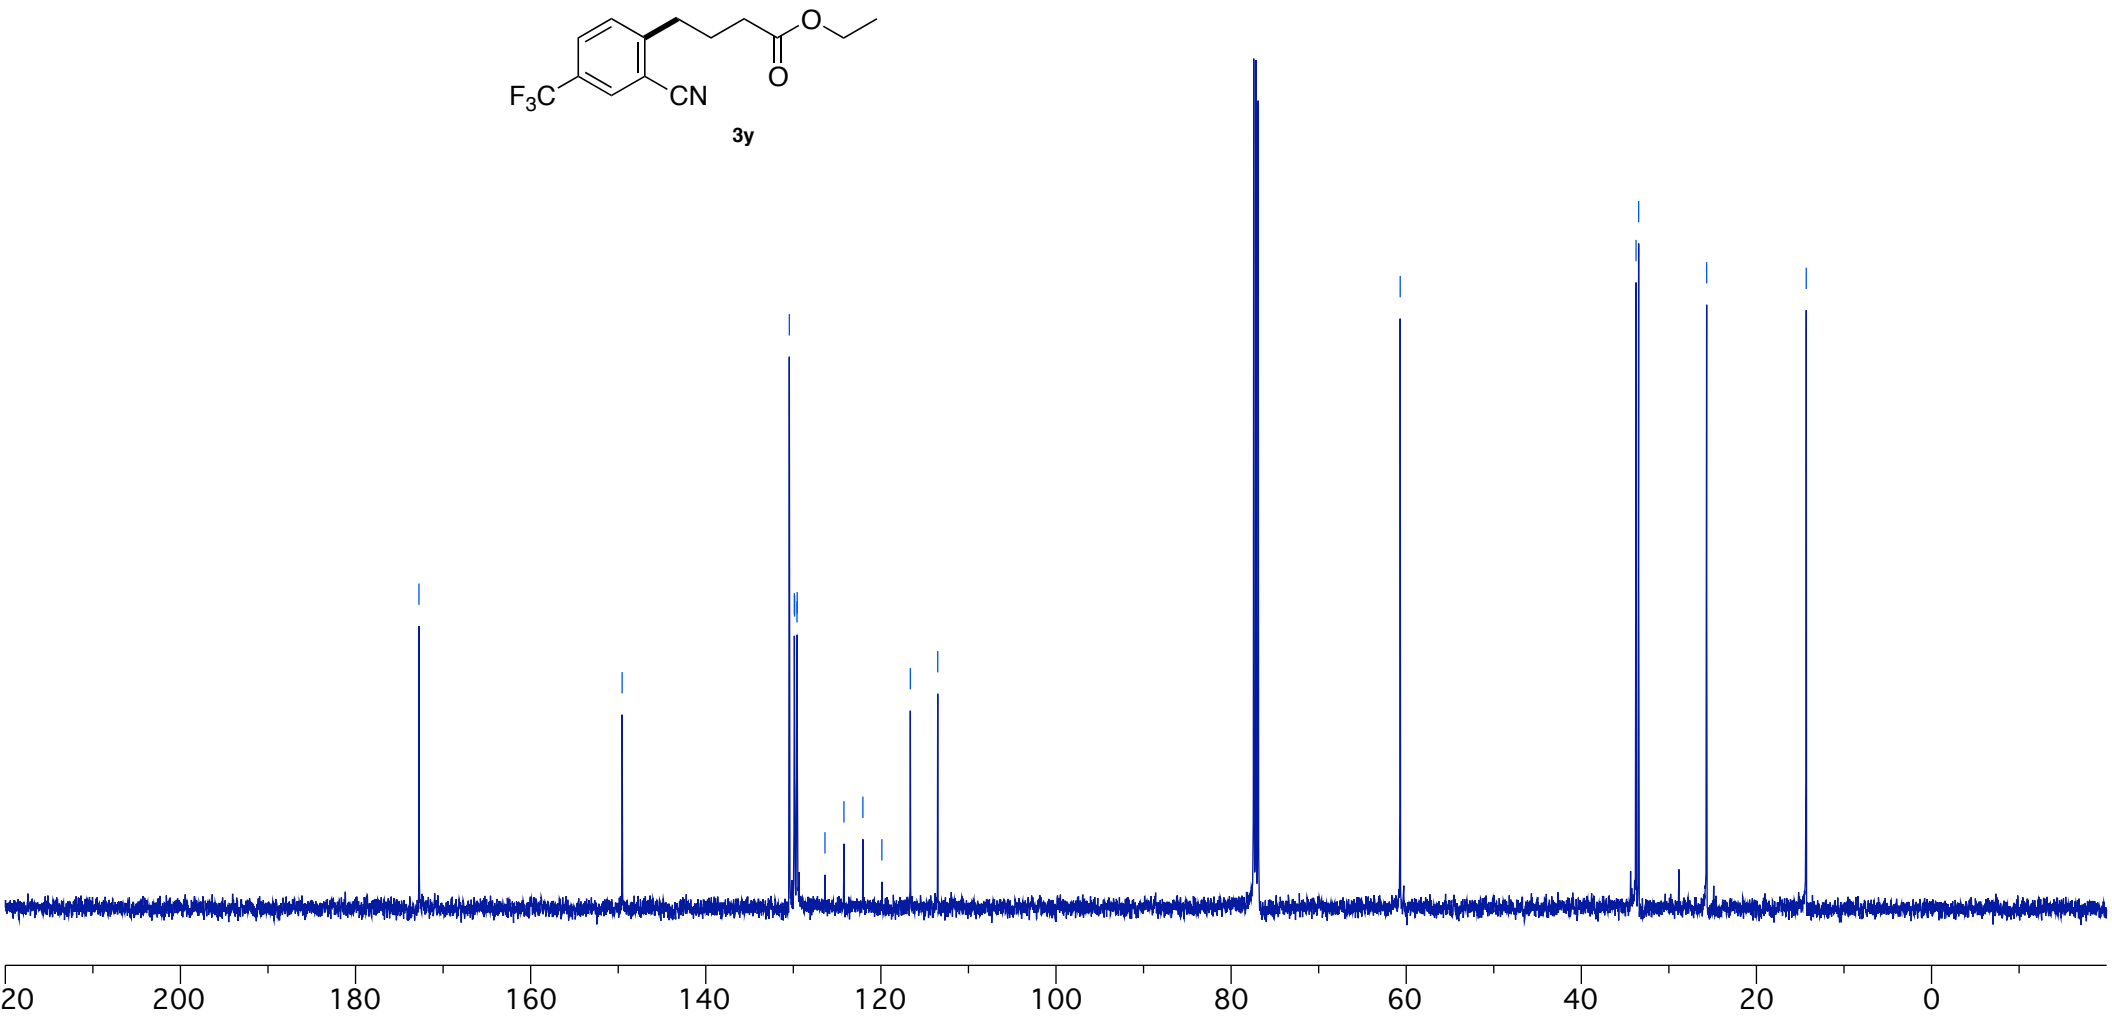

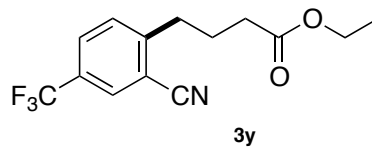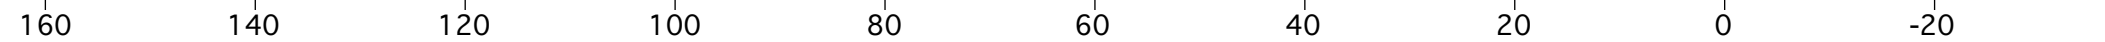

7.034  
7.017  
6.765  
6.748

5.335

4.152  
4.138  
4.124  
4.1092.588  
2.573  
2.557  
2.327  
2.312  
2.297  
1.944  
1.929  
1.914  
1.899  
1.884  
1.269  
1.254  
1.240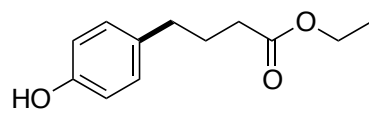

3z

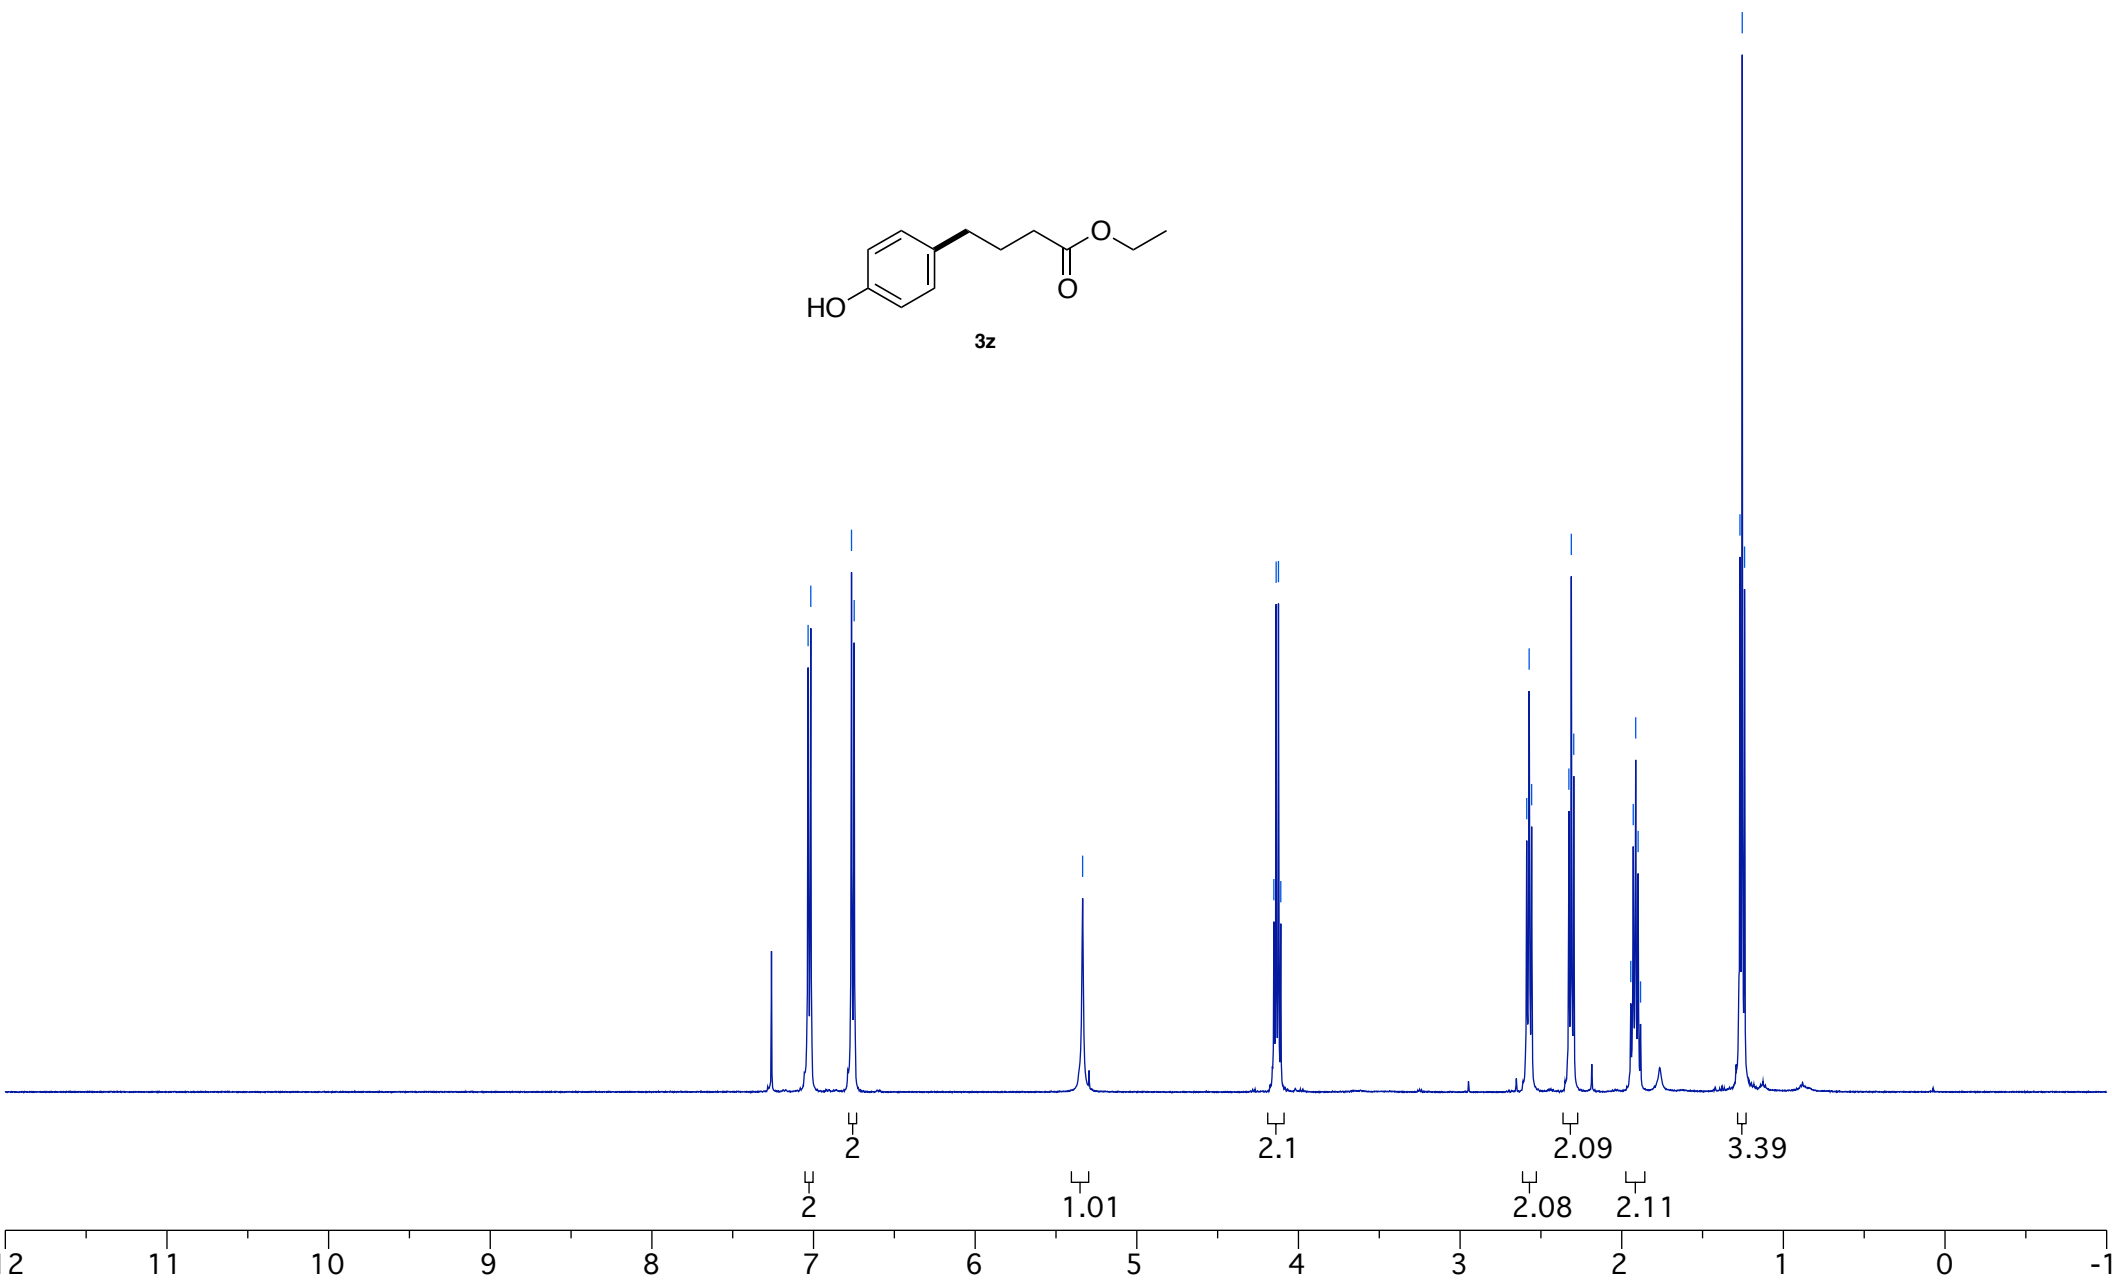

S-110

174.069

154.023

133.581

129.679

115.337

60.557

34.366

33.810

26.910

14.371

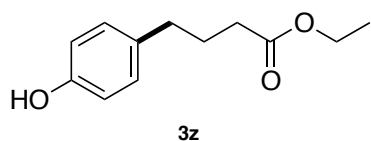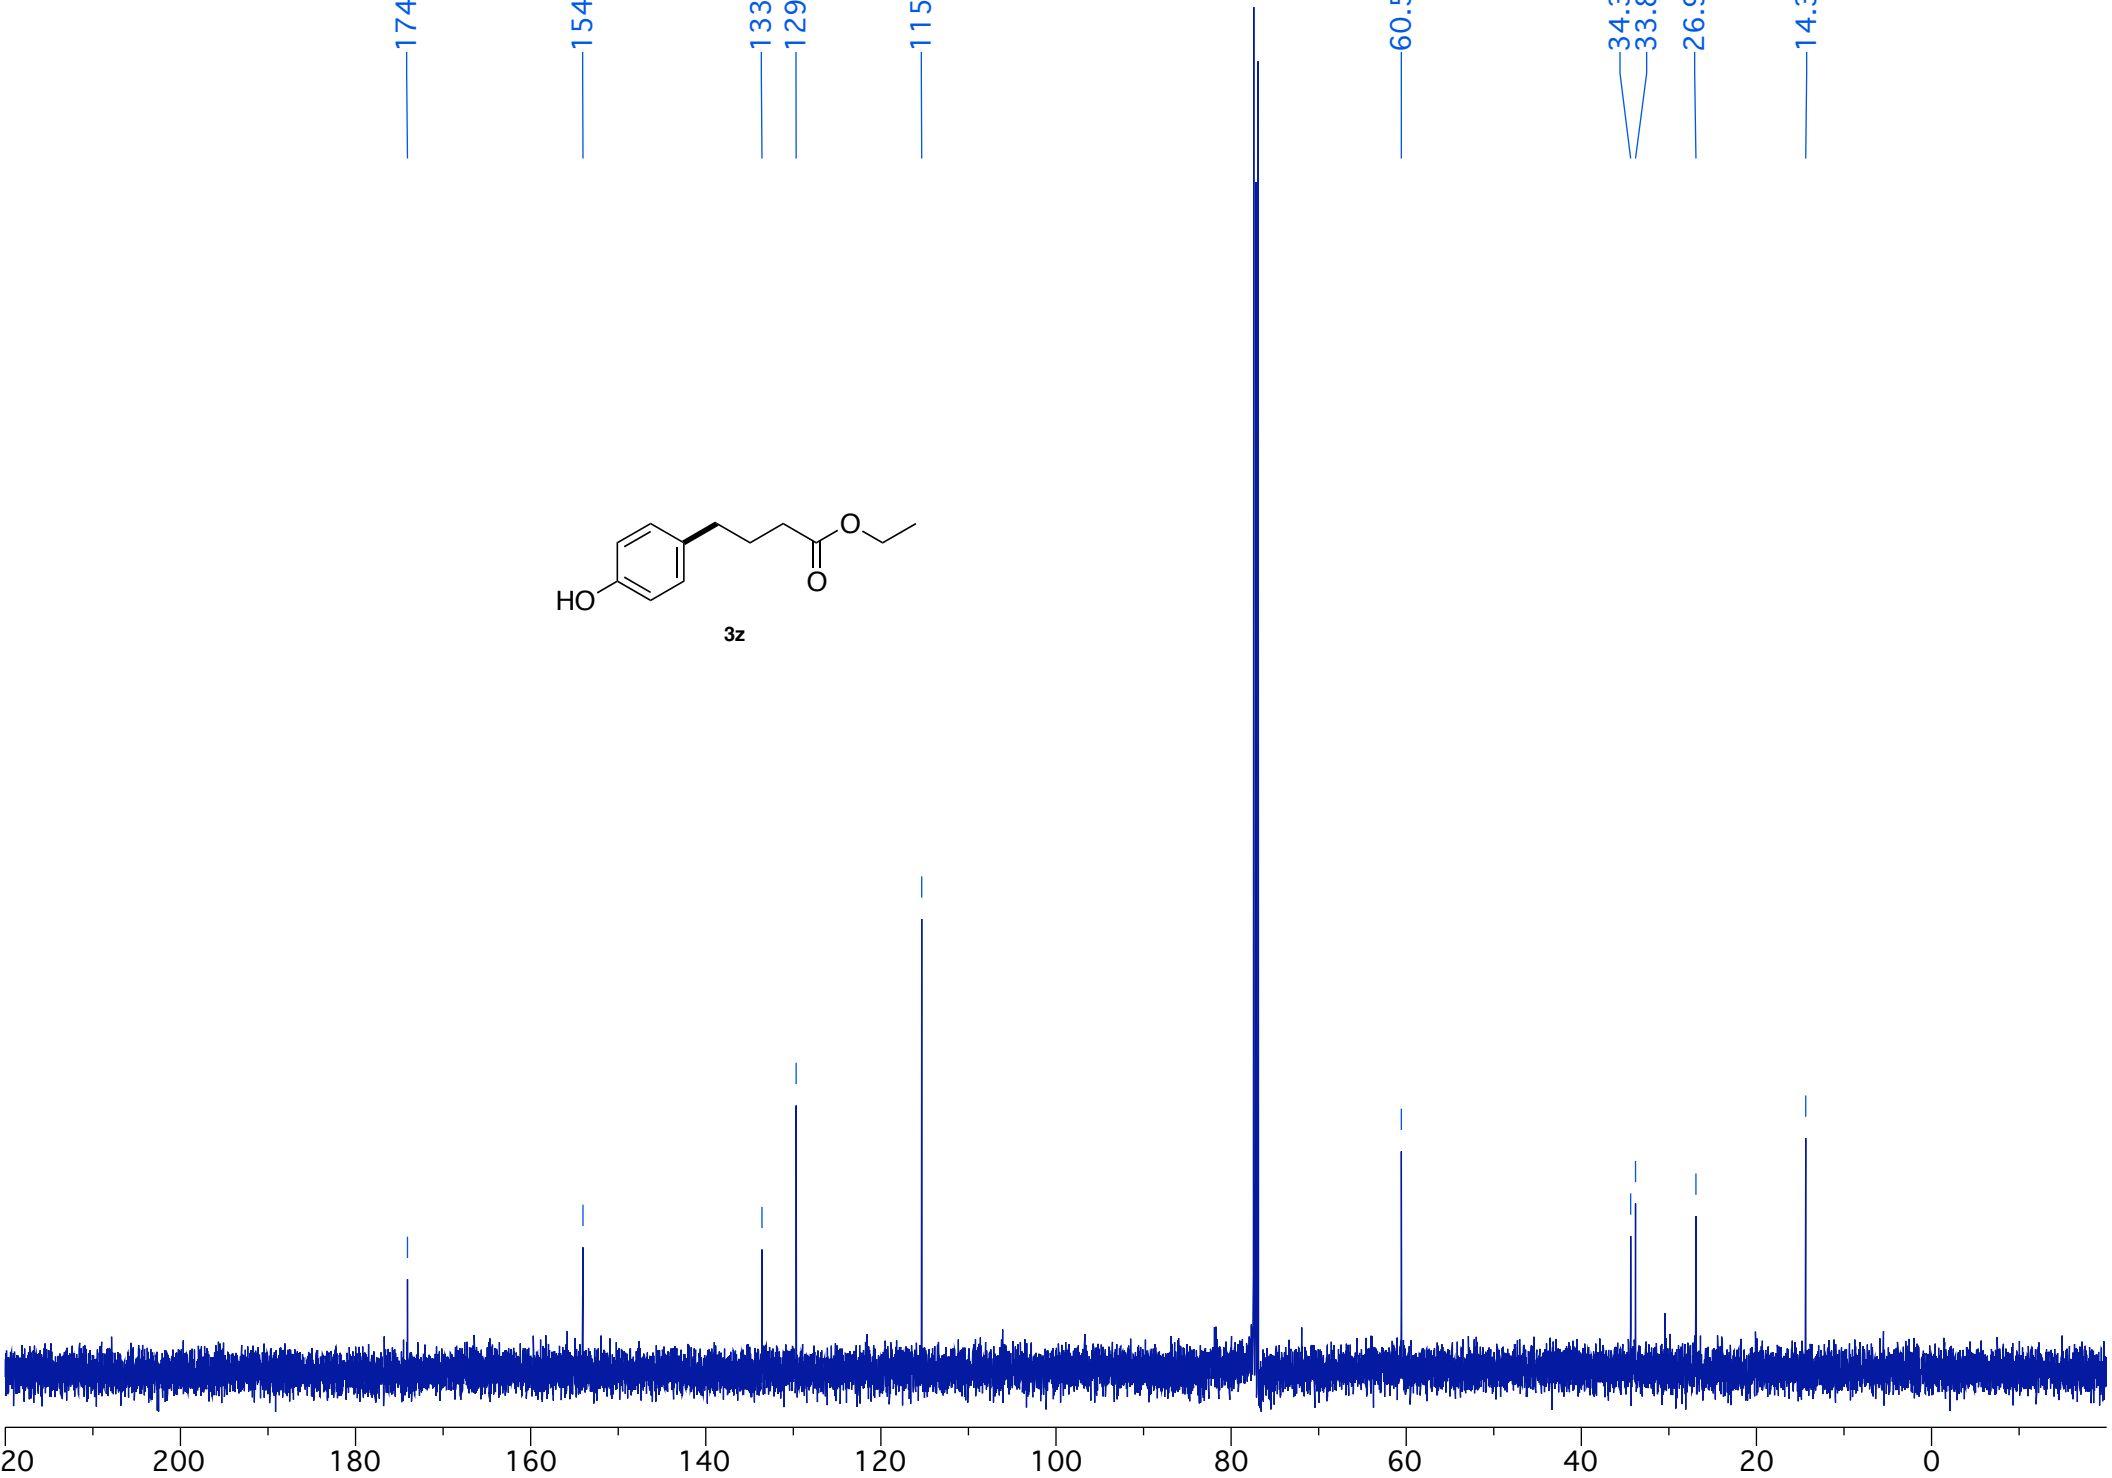

S-111

7.695  
7.680  
7.303  
7.287  
7.078  
7.062  
6.880  
6.865

4.129  
4.115  
4.101  
4.087

2.611  
2.596  
2.580  
2.289  
2.275  
2.260  
1.924  
1.909  
1.894  
1.879  
1.864  
1.253  
1.239  
1.225

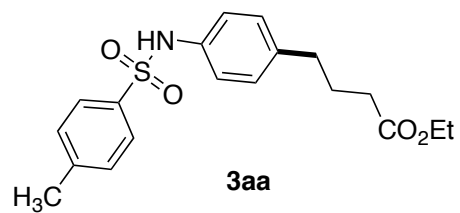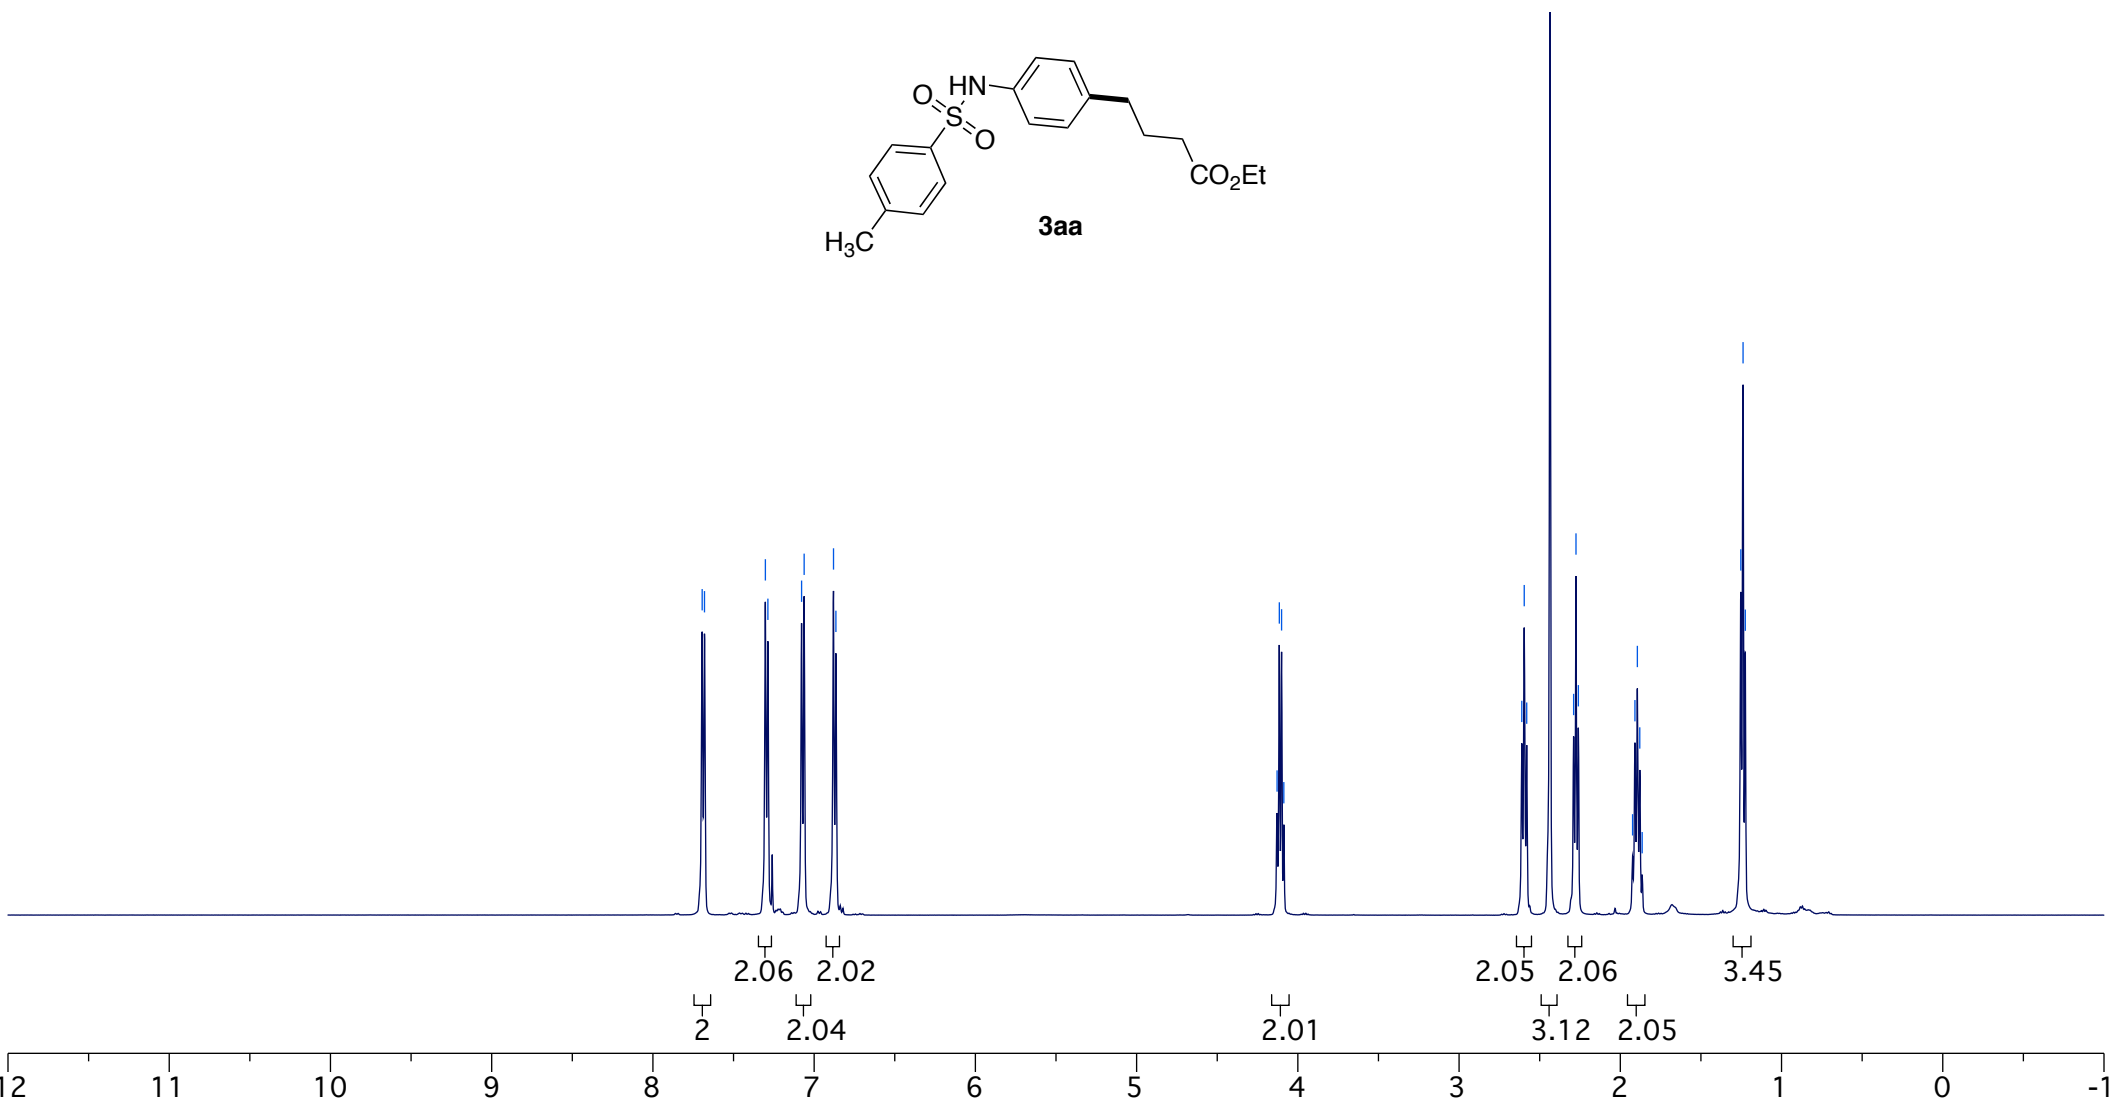

S-112

173.385

147.952

145.358

140.583

132.574

129.810

129.622

128.596

122.323

60.440

34.550

33.621

26.444

21.805

14.348

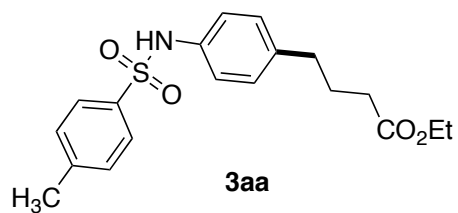

3aa

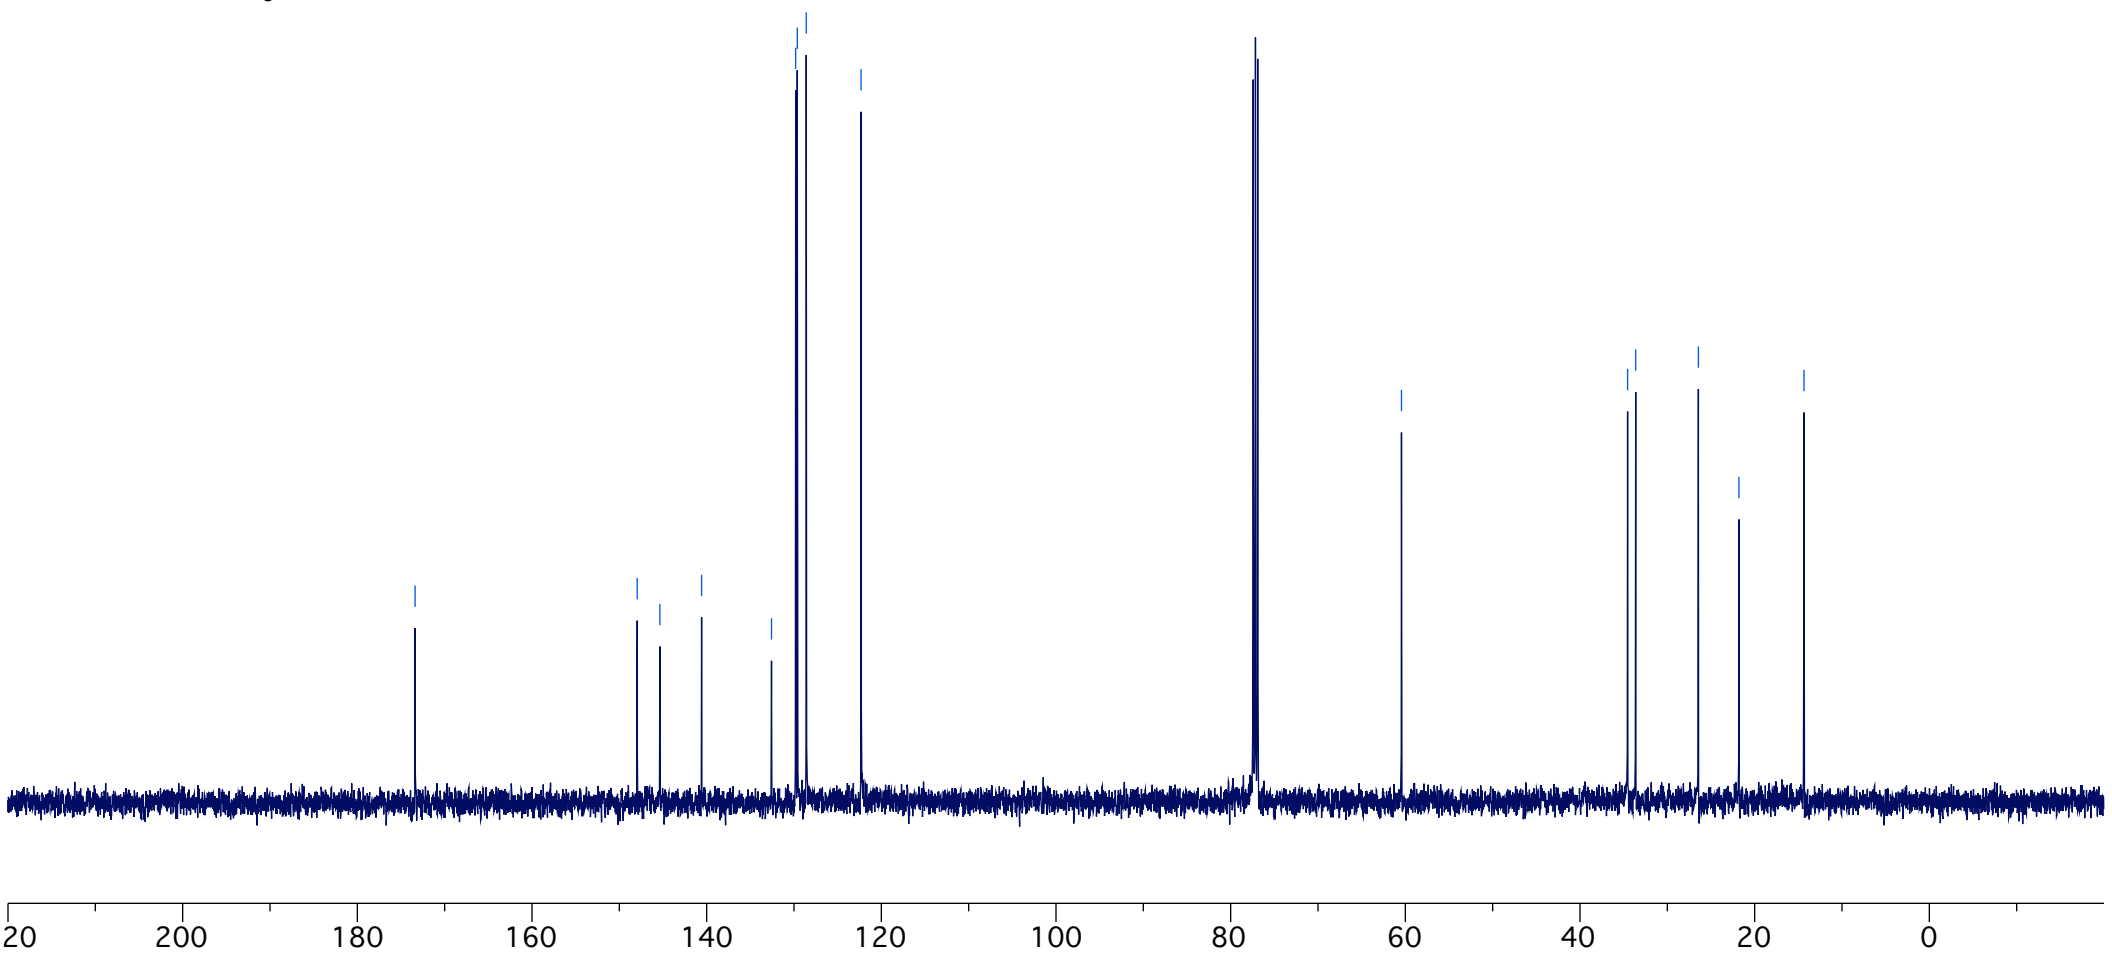



S-113

7.077  
7.061  
6.756  
6.739

4.659

3.775  
3.761  
3.747

2.764  
2.750  
2.736

0.876

0.010

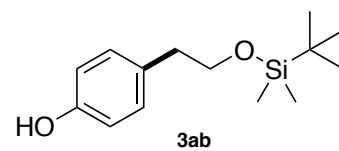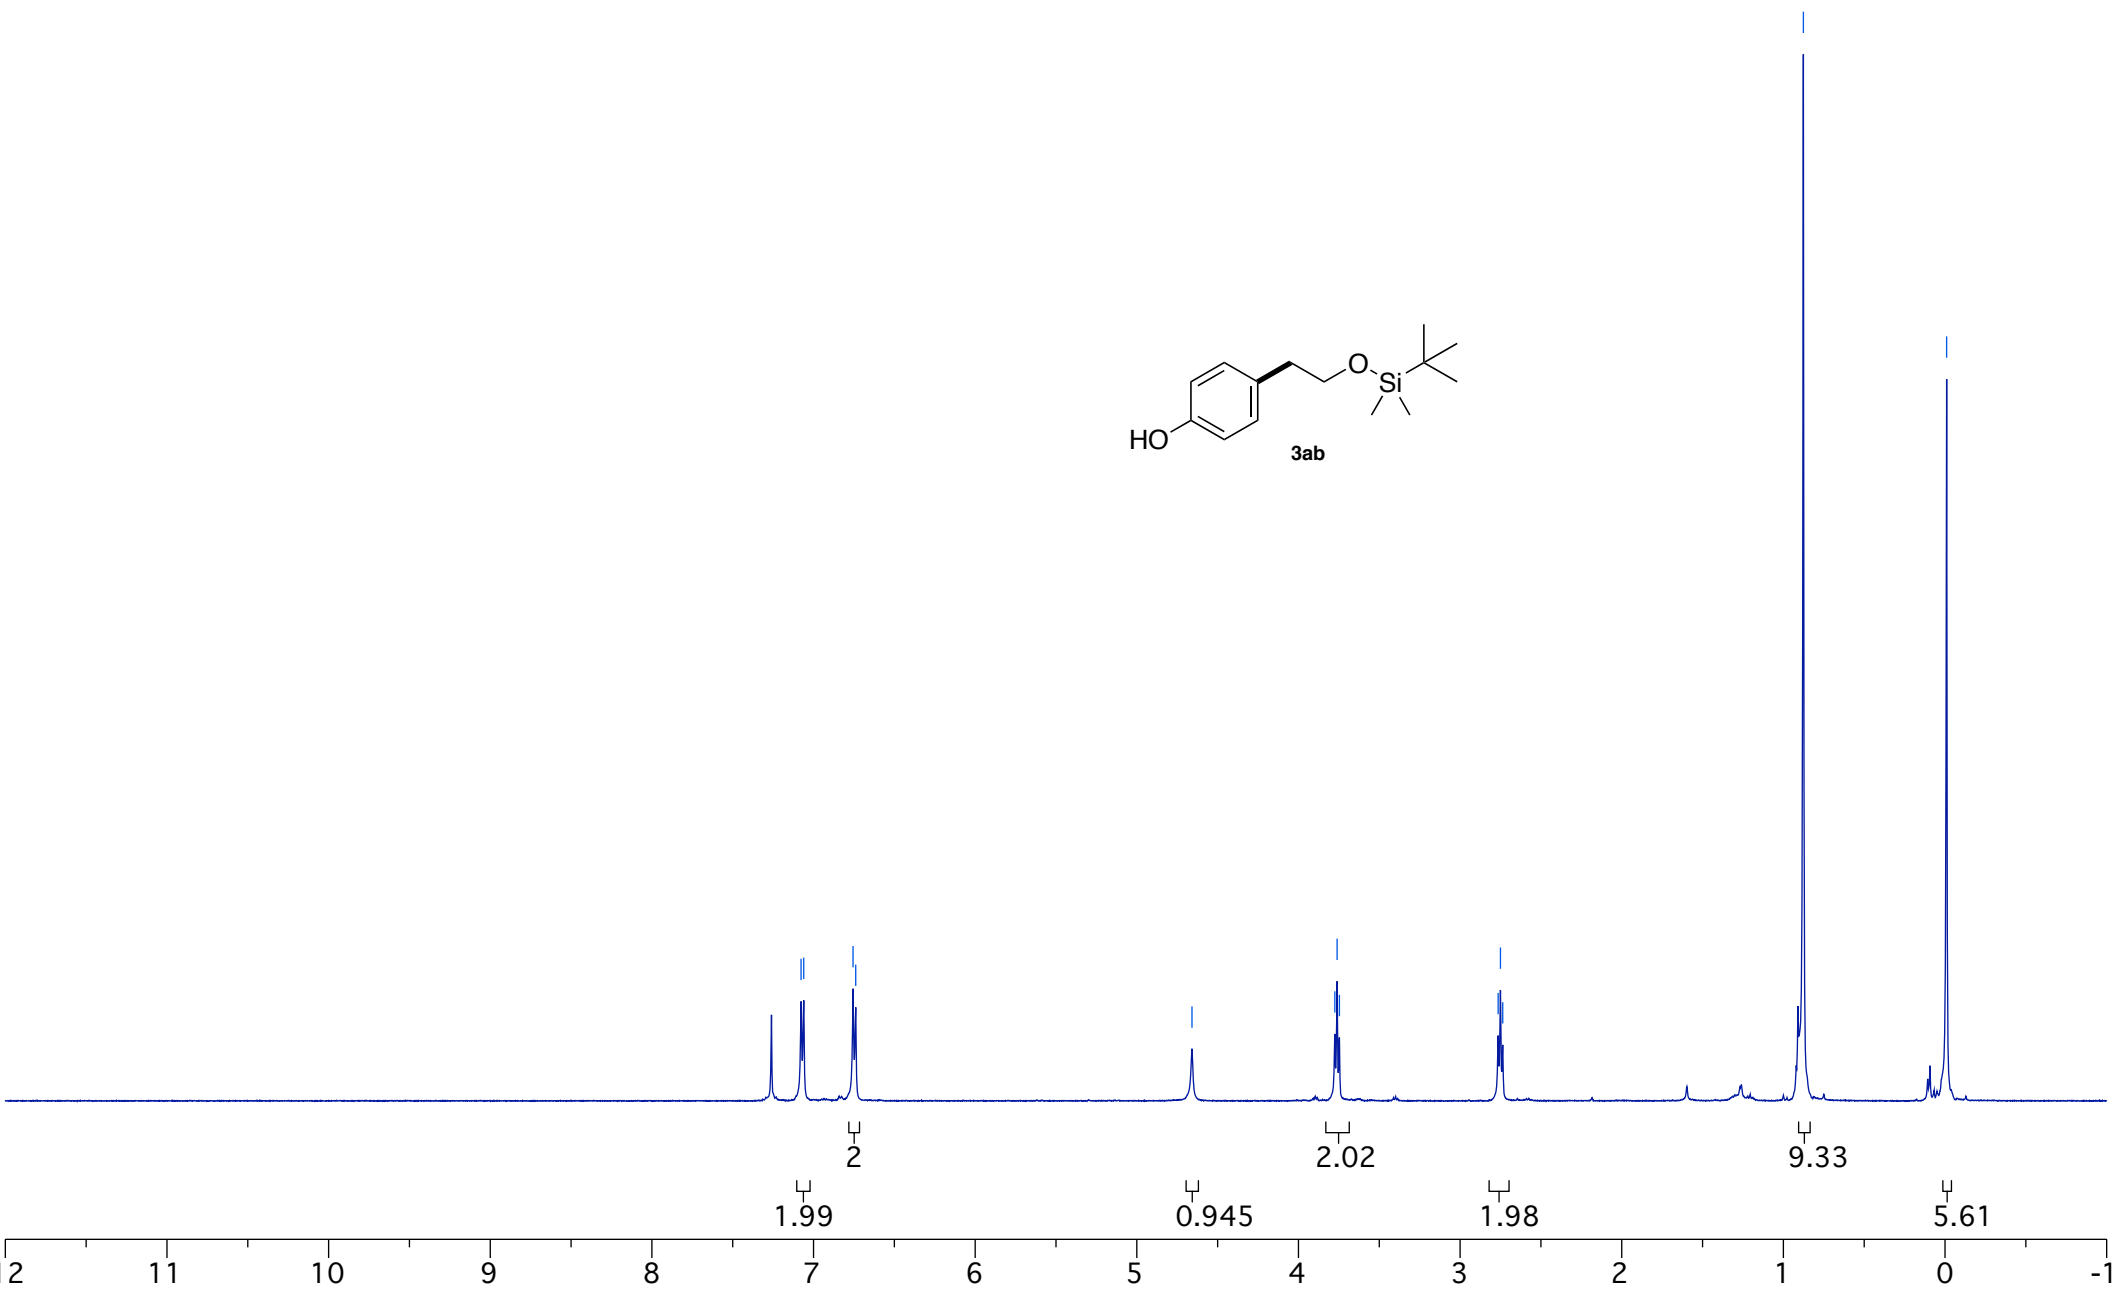

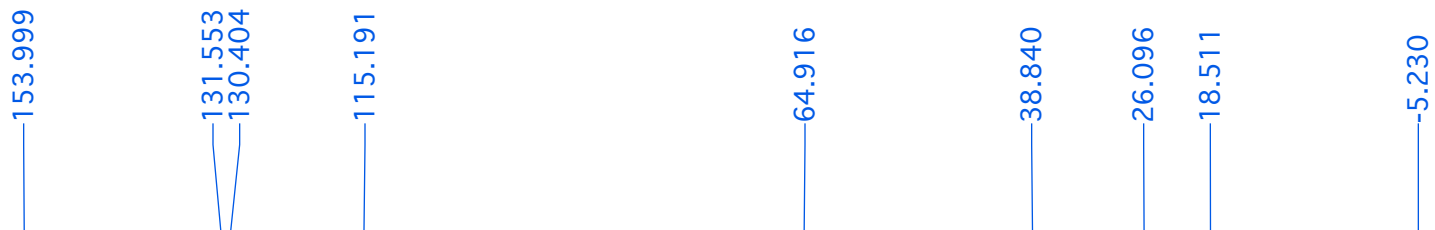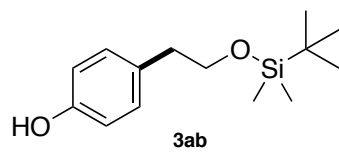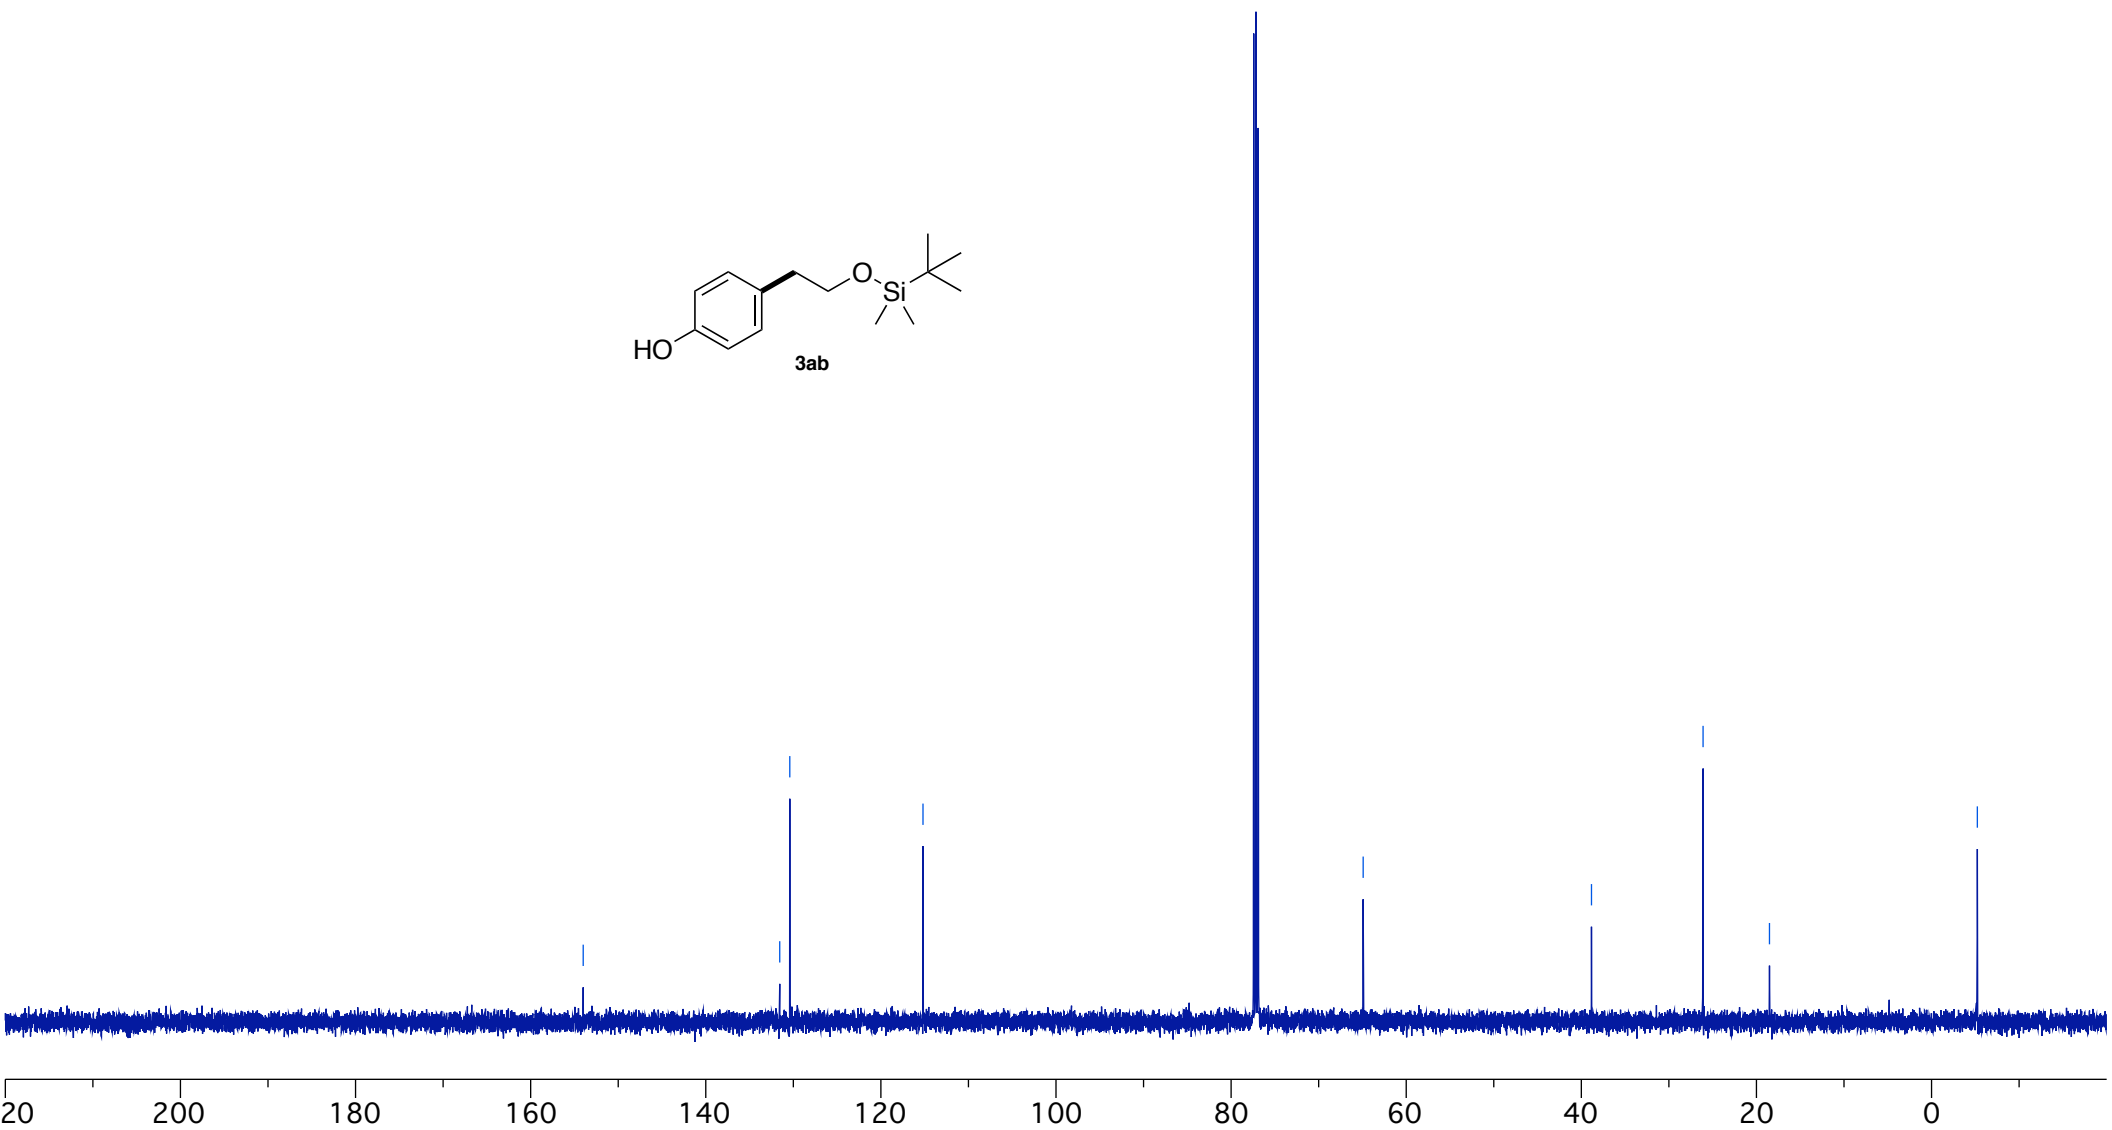

S-115

7.948  
7.925  
7.909  
7.476  
7.461  
7.382  
7.367  
7.352

5.096  
5.086  
5.077  
4.389  
4.375  
4.361  
4.346  
3.940  
3.926  
3.919  
3.912  
3.892  
3.870  
3.850  
3.843  
3.836  
3.822  
3.018  
3.009

1.402  
1.388  
1.374

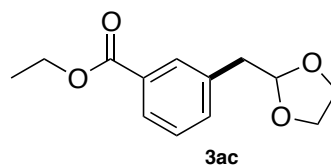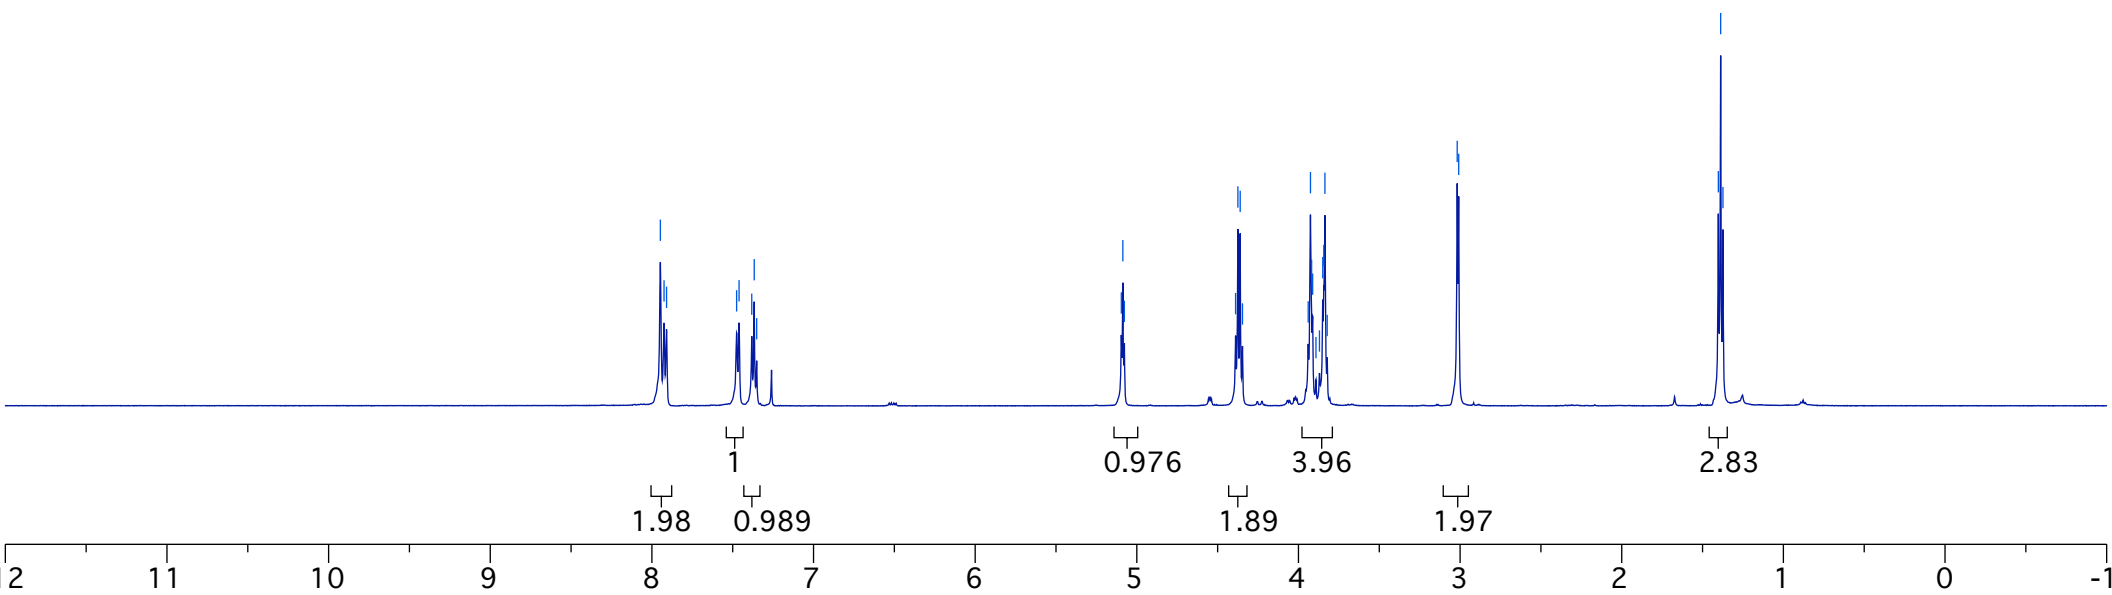

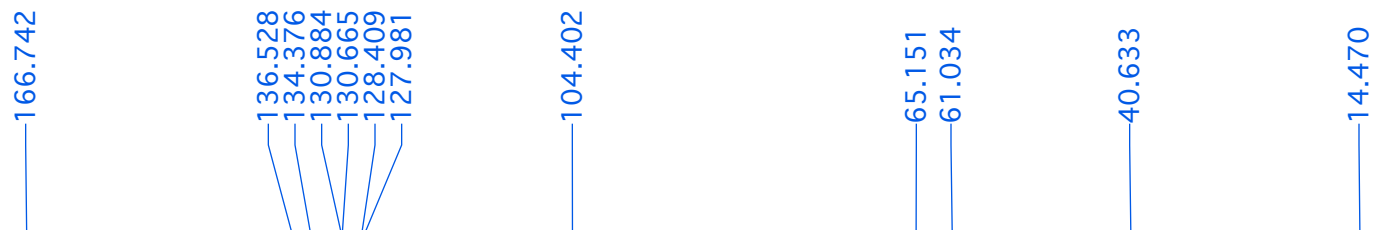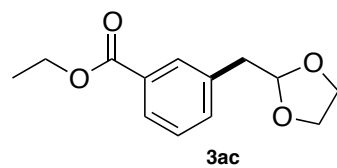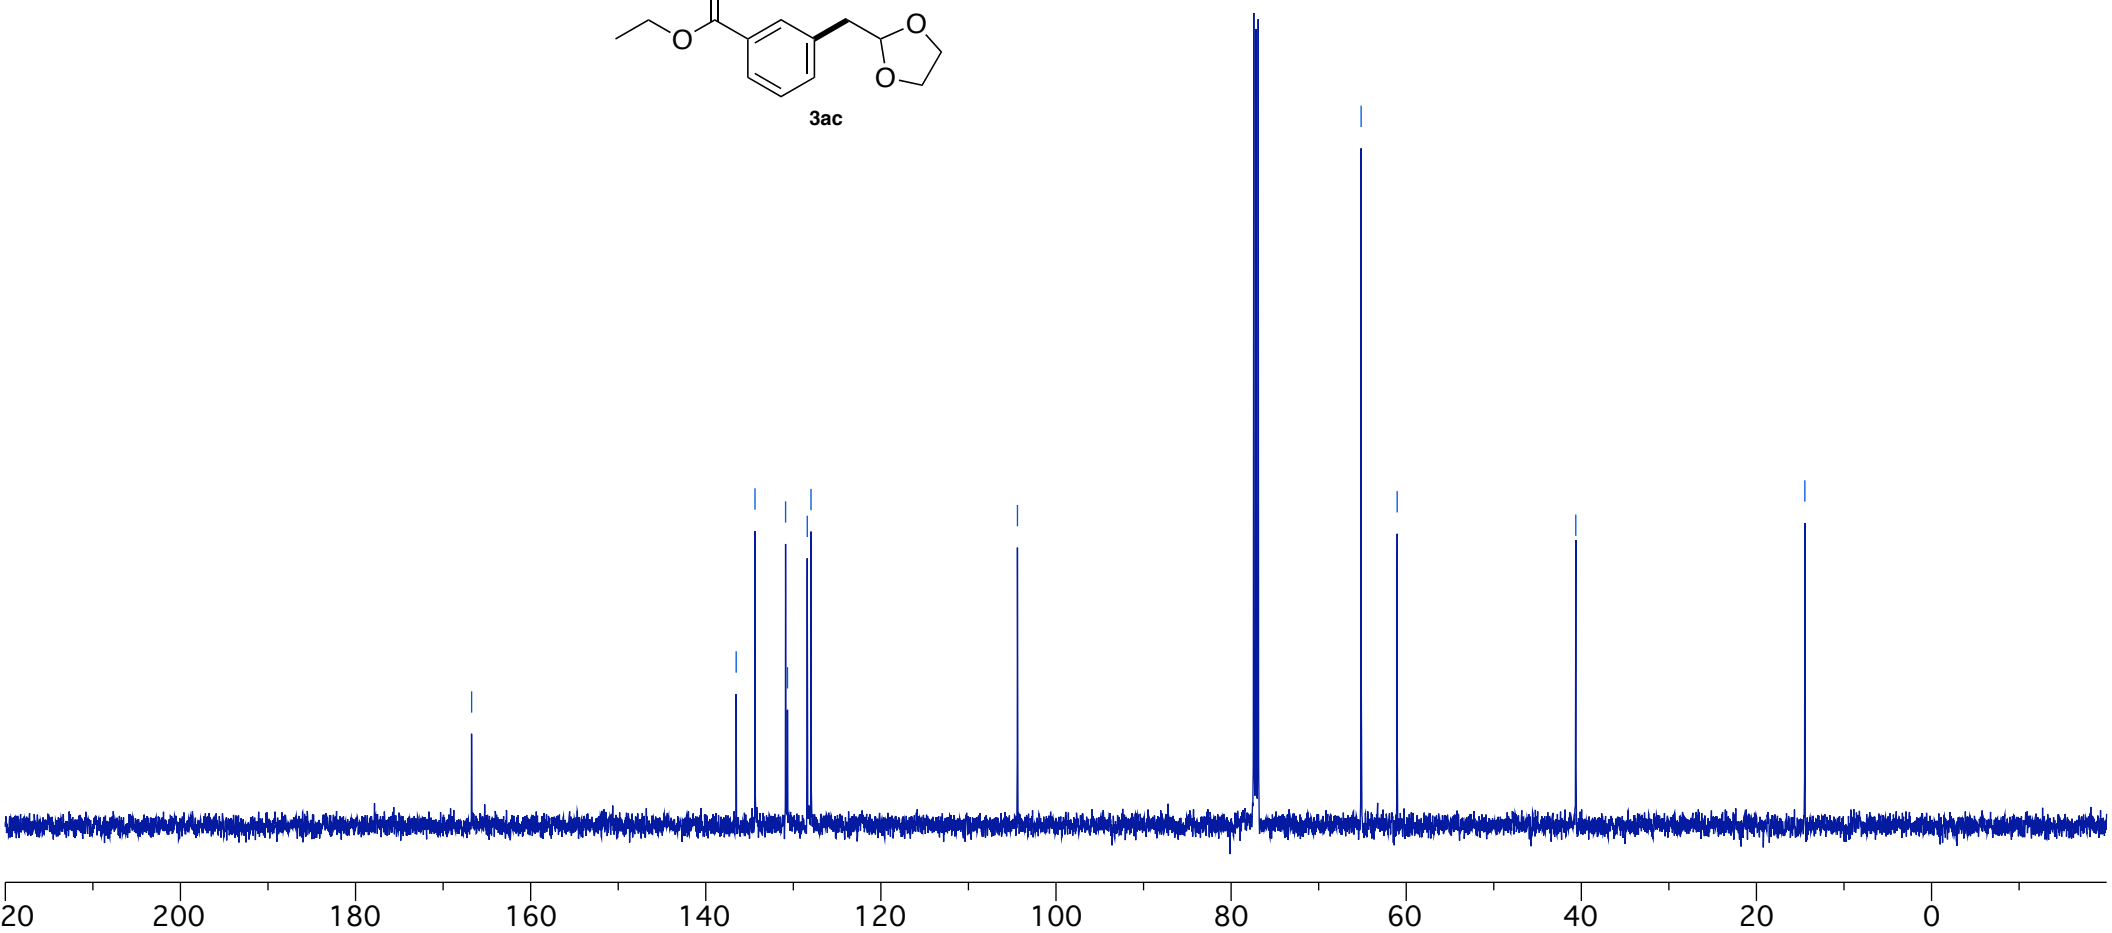

S-117

7.709  
7.688  
7.315  
7.294  
7.087  
7.066  
6.889  
6.868

4.142  
4.125  
4.107  
4.089

2.621  
2.602  
2.583  
2.301  
2.283  
2.264  
1.938  
1.919  
1.900  
1.881  
1.863  
1.266  
1.248  
1.230

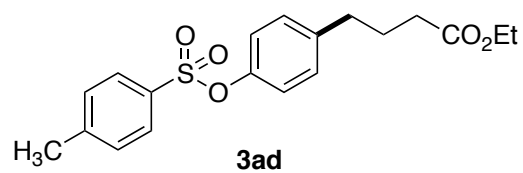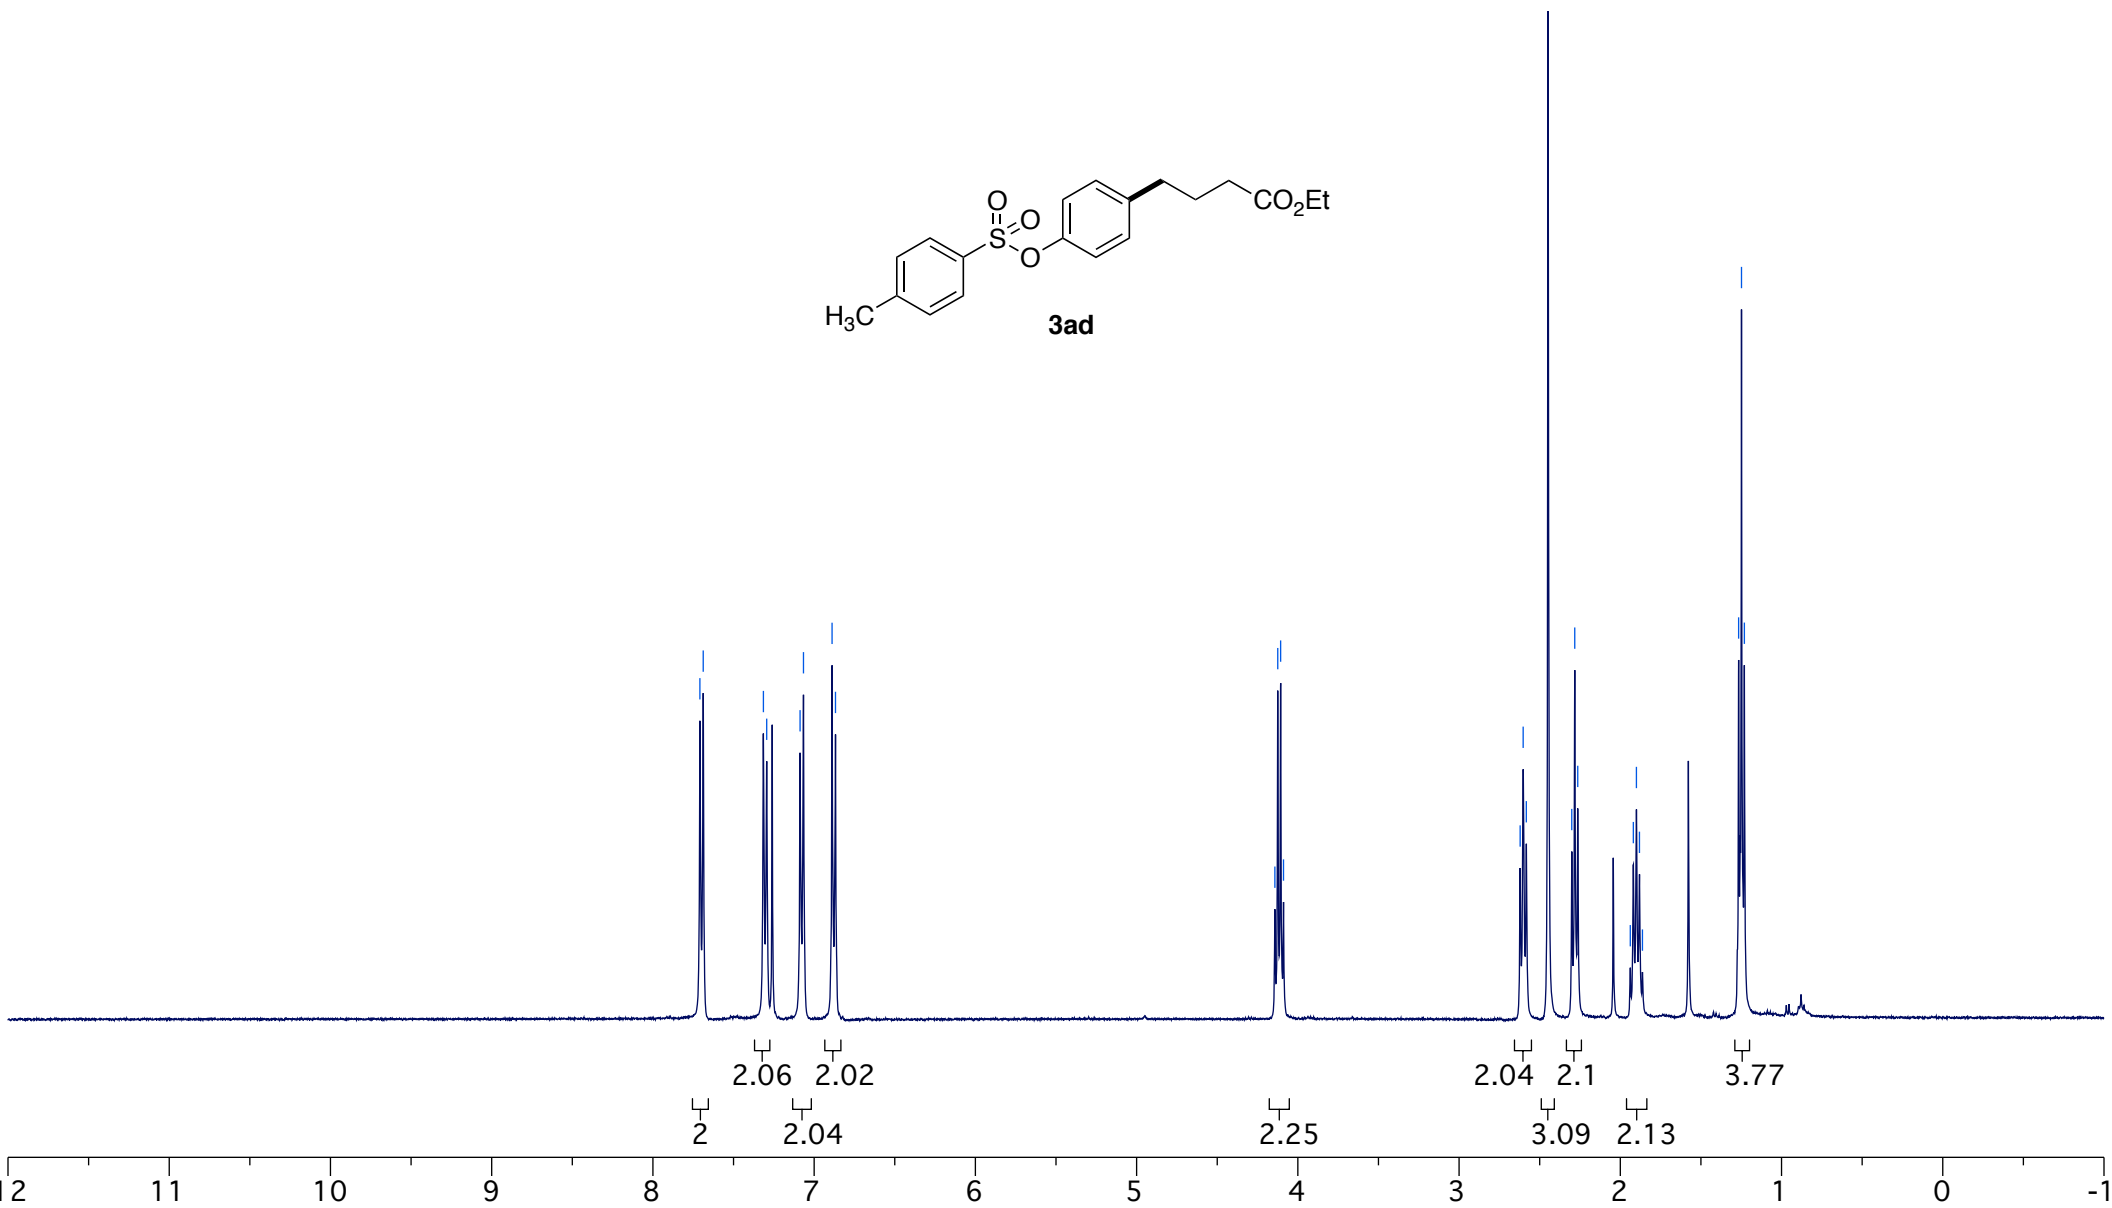

S-118

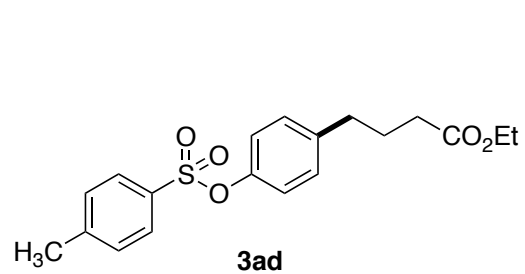

173.320

147.907

145.333

140.552

132.515

129.776

129.580

128.538

122.268

60.377

34.493

33.562

26.396

21.746

14.300

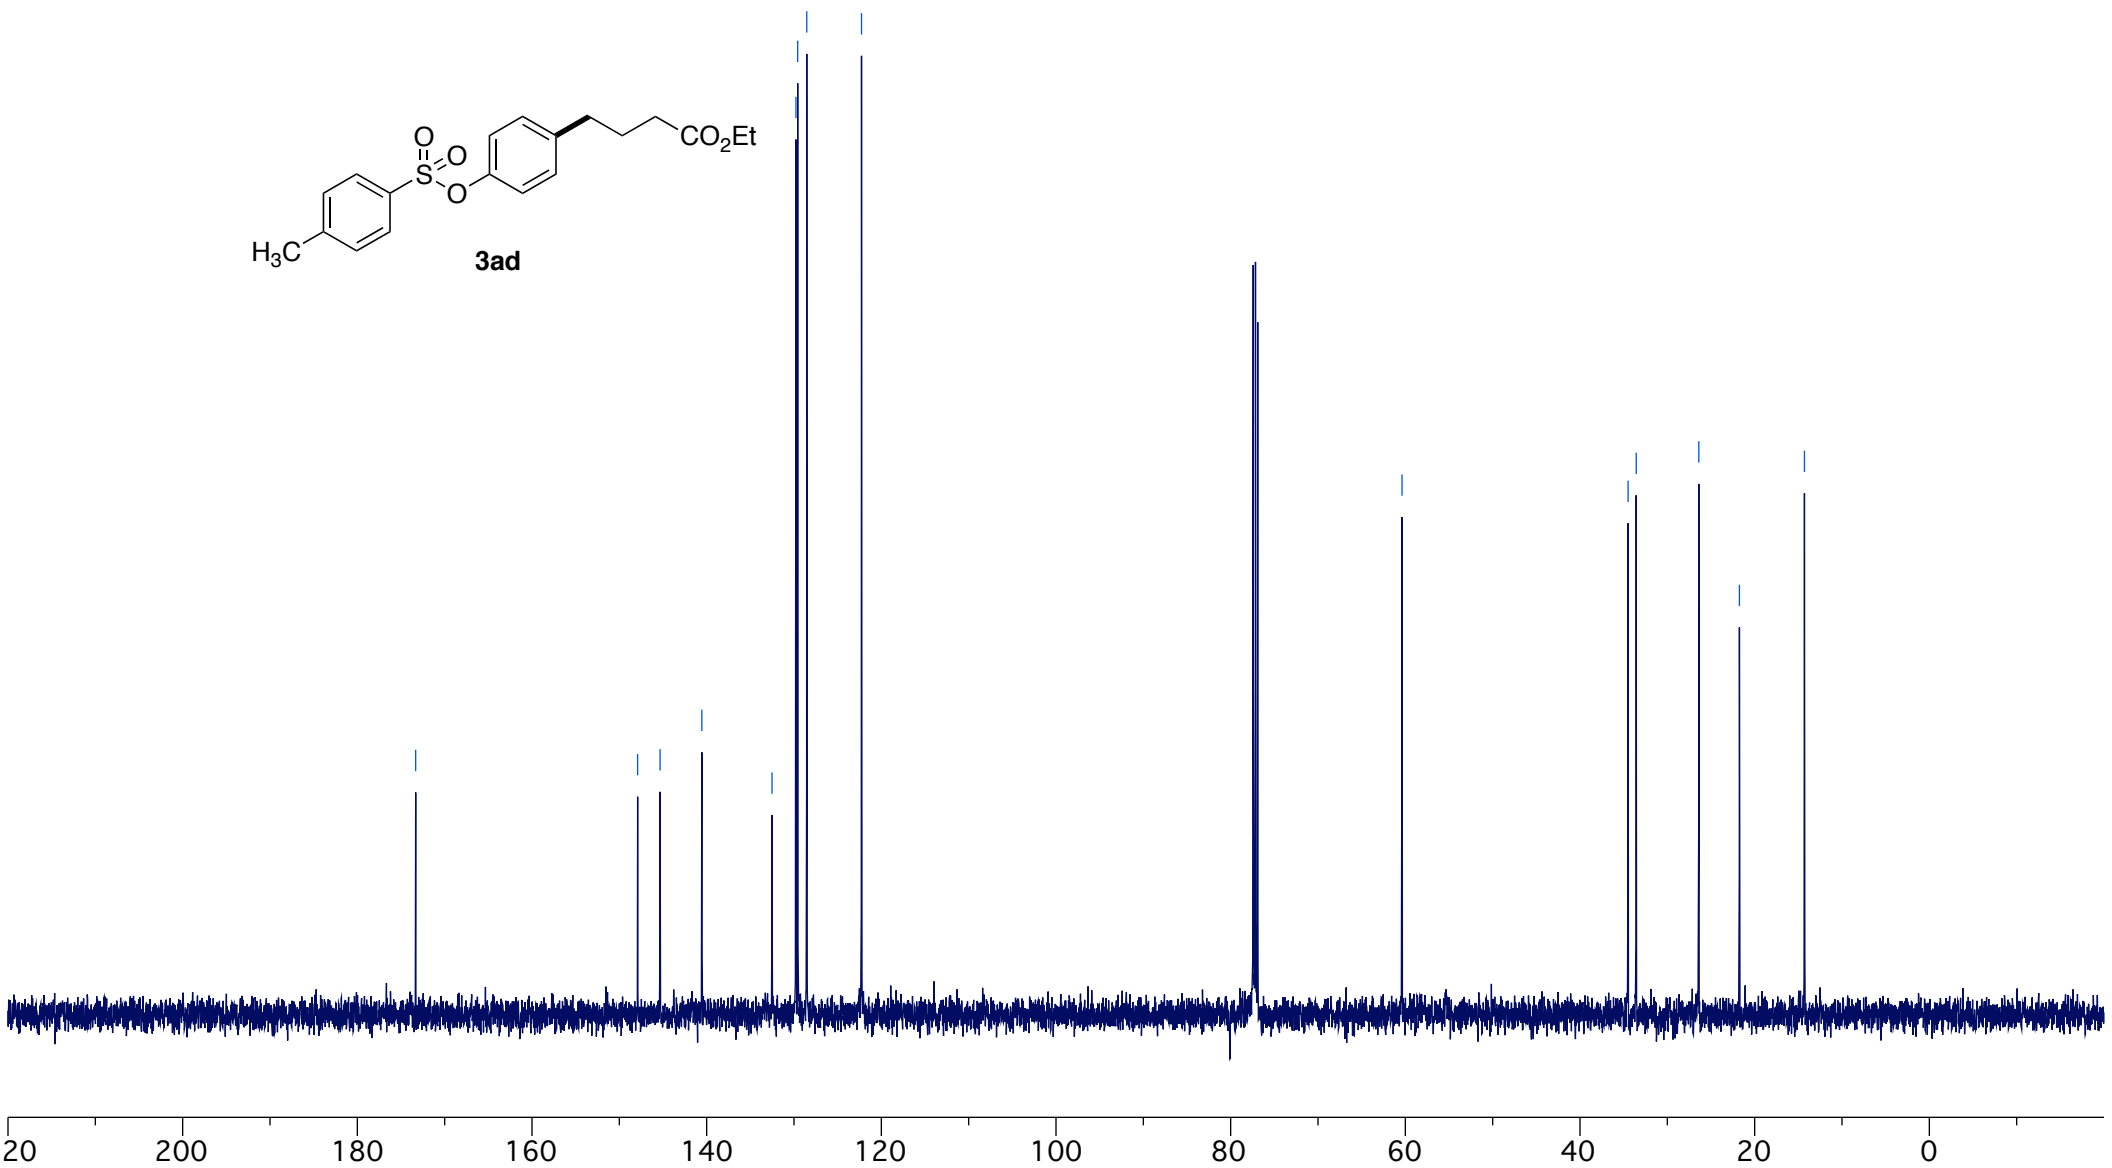

S-119

7.260  
7.243  
7.194  
7.173

4.154  
4.137  
4.130  
4.119  
4.101

2.698  
2.679  
2.659  
2.342  
2.324  
2.305  
1.988  
1.970  
1.950  
1.932  
1.913  
1.275  
1.257  
1.239

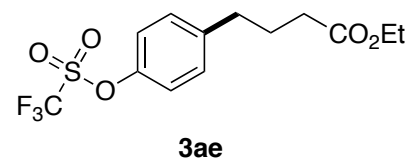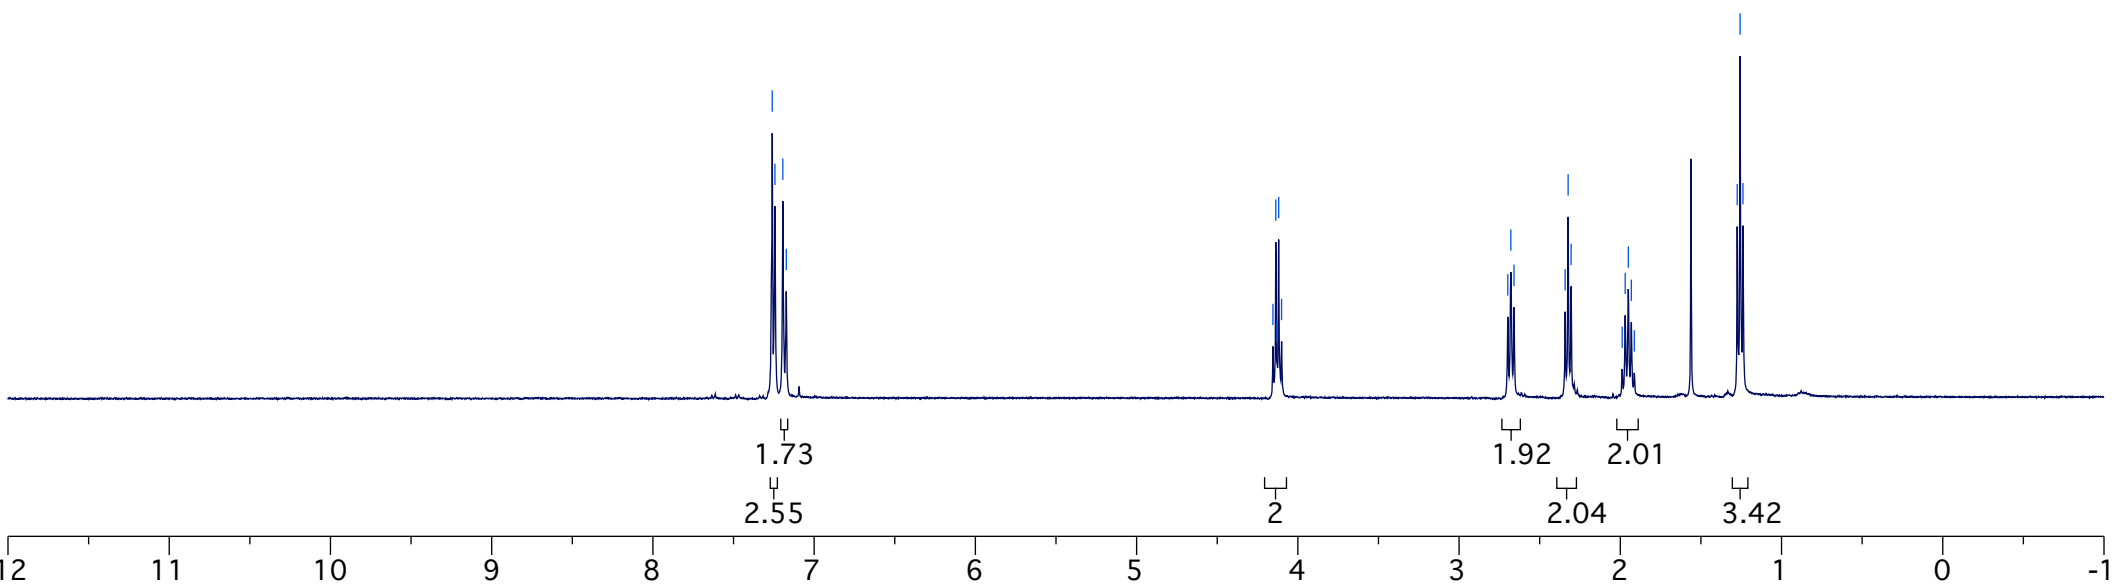

S-120

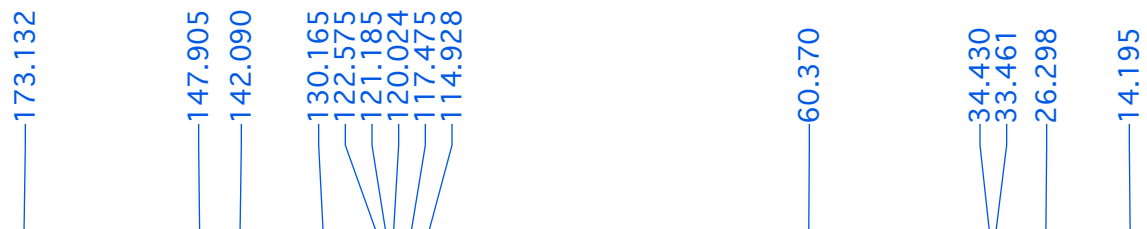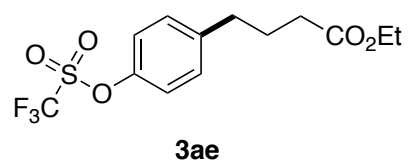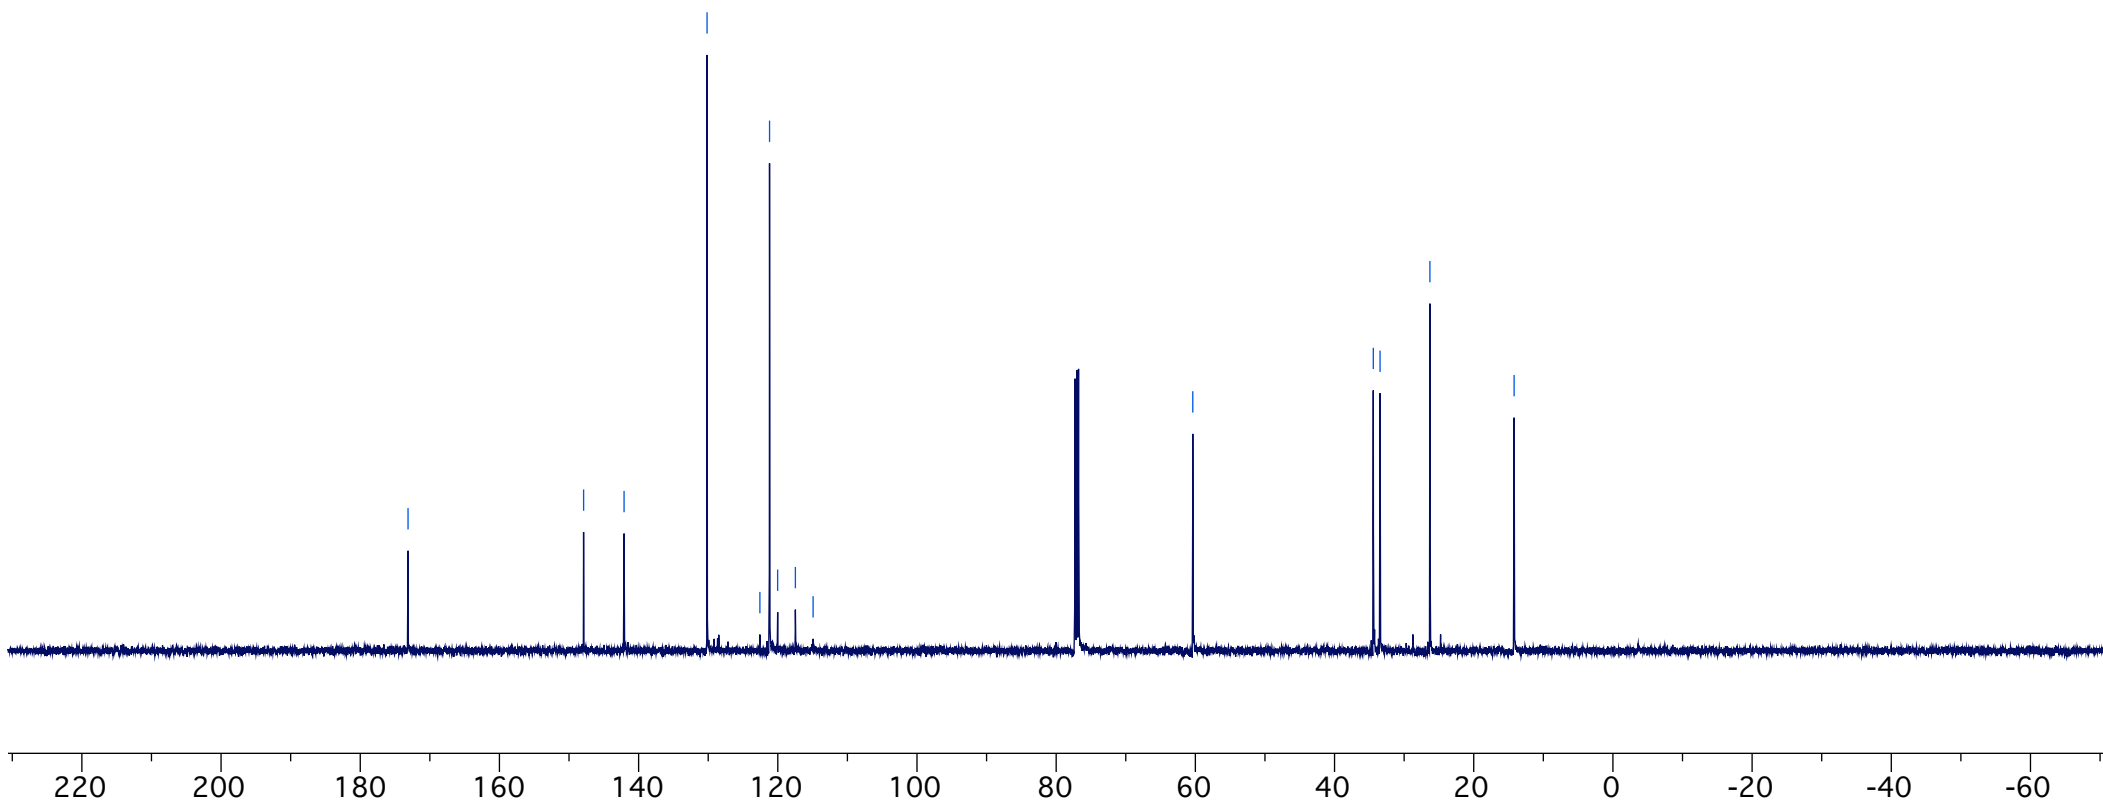



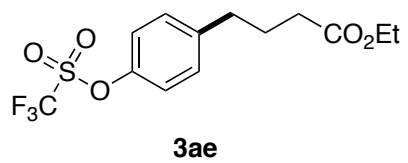

10.038



7.185  
7.168  
7.000  
6.9844.144  
4.130  
4.115  
4.1012.654  
2.639  
2.624  
2.331  
2.316  
2.301  
1.971  
1.956  
1.941  
1.926  
1.911  
1.264  
1.250  
1.236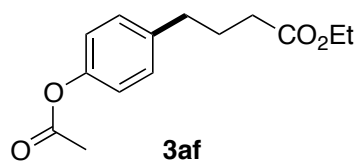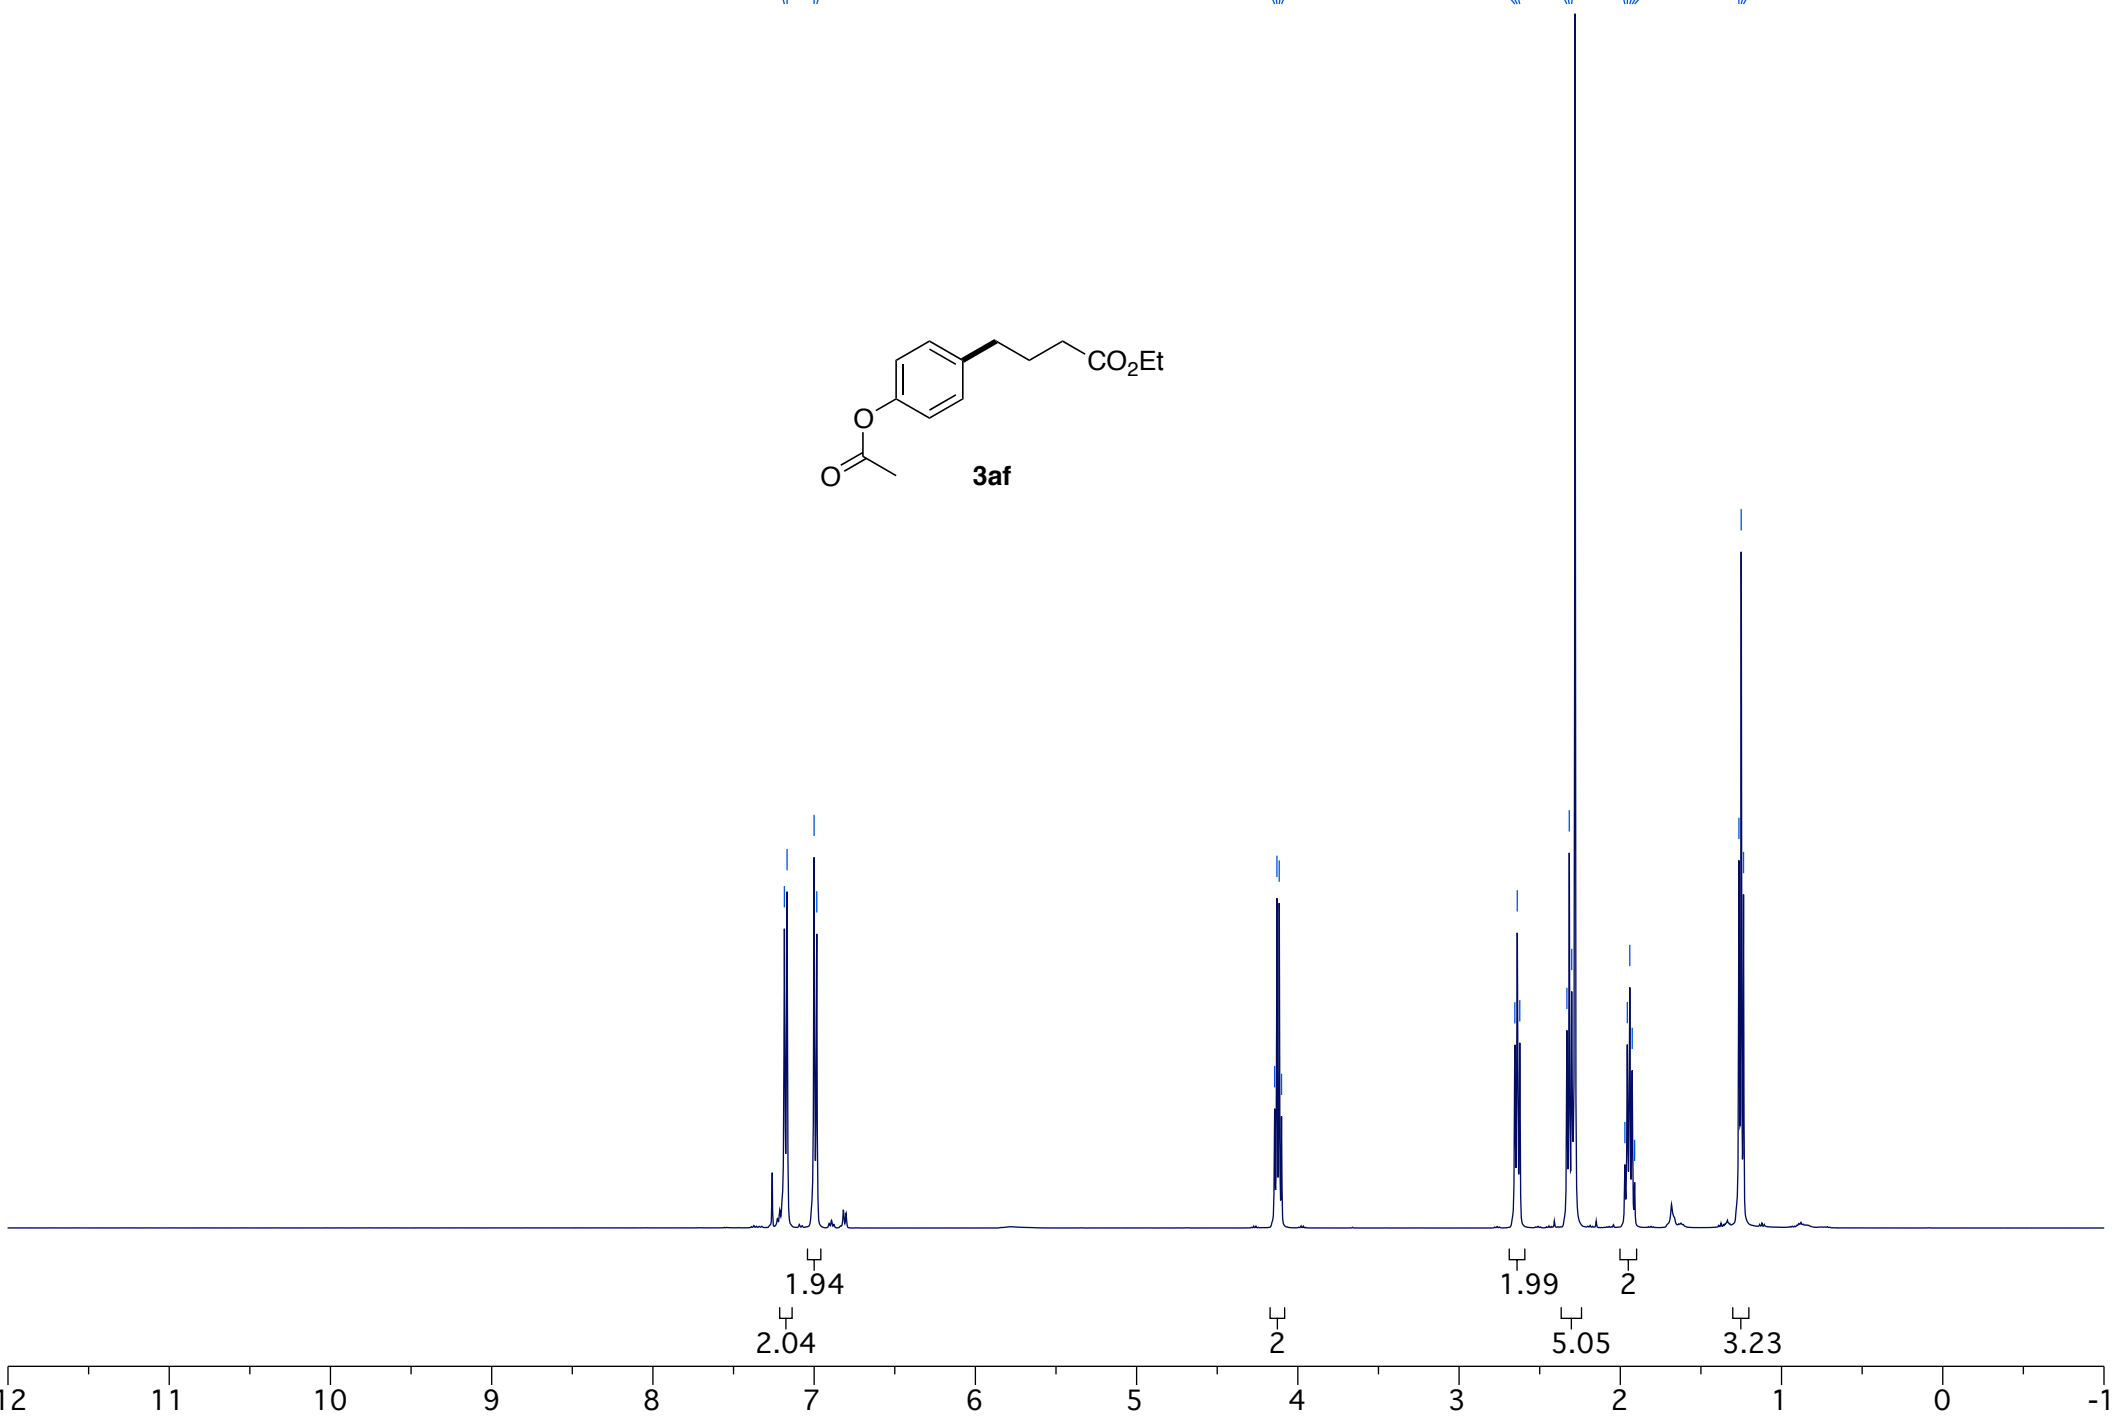

S-123

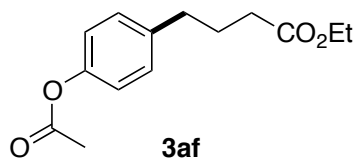

173.534  
169.745

148.982

139.110

129.495

121.492

60.413

34.612  
33.717

26.586

21.228

14.353

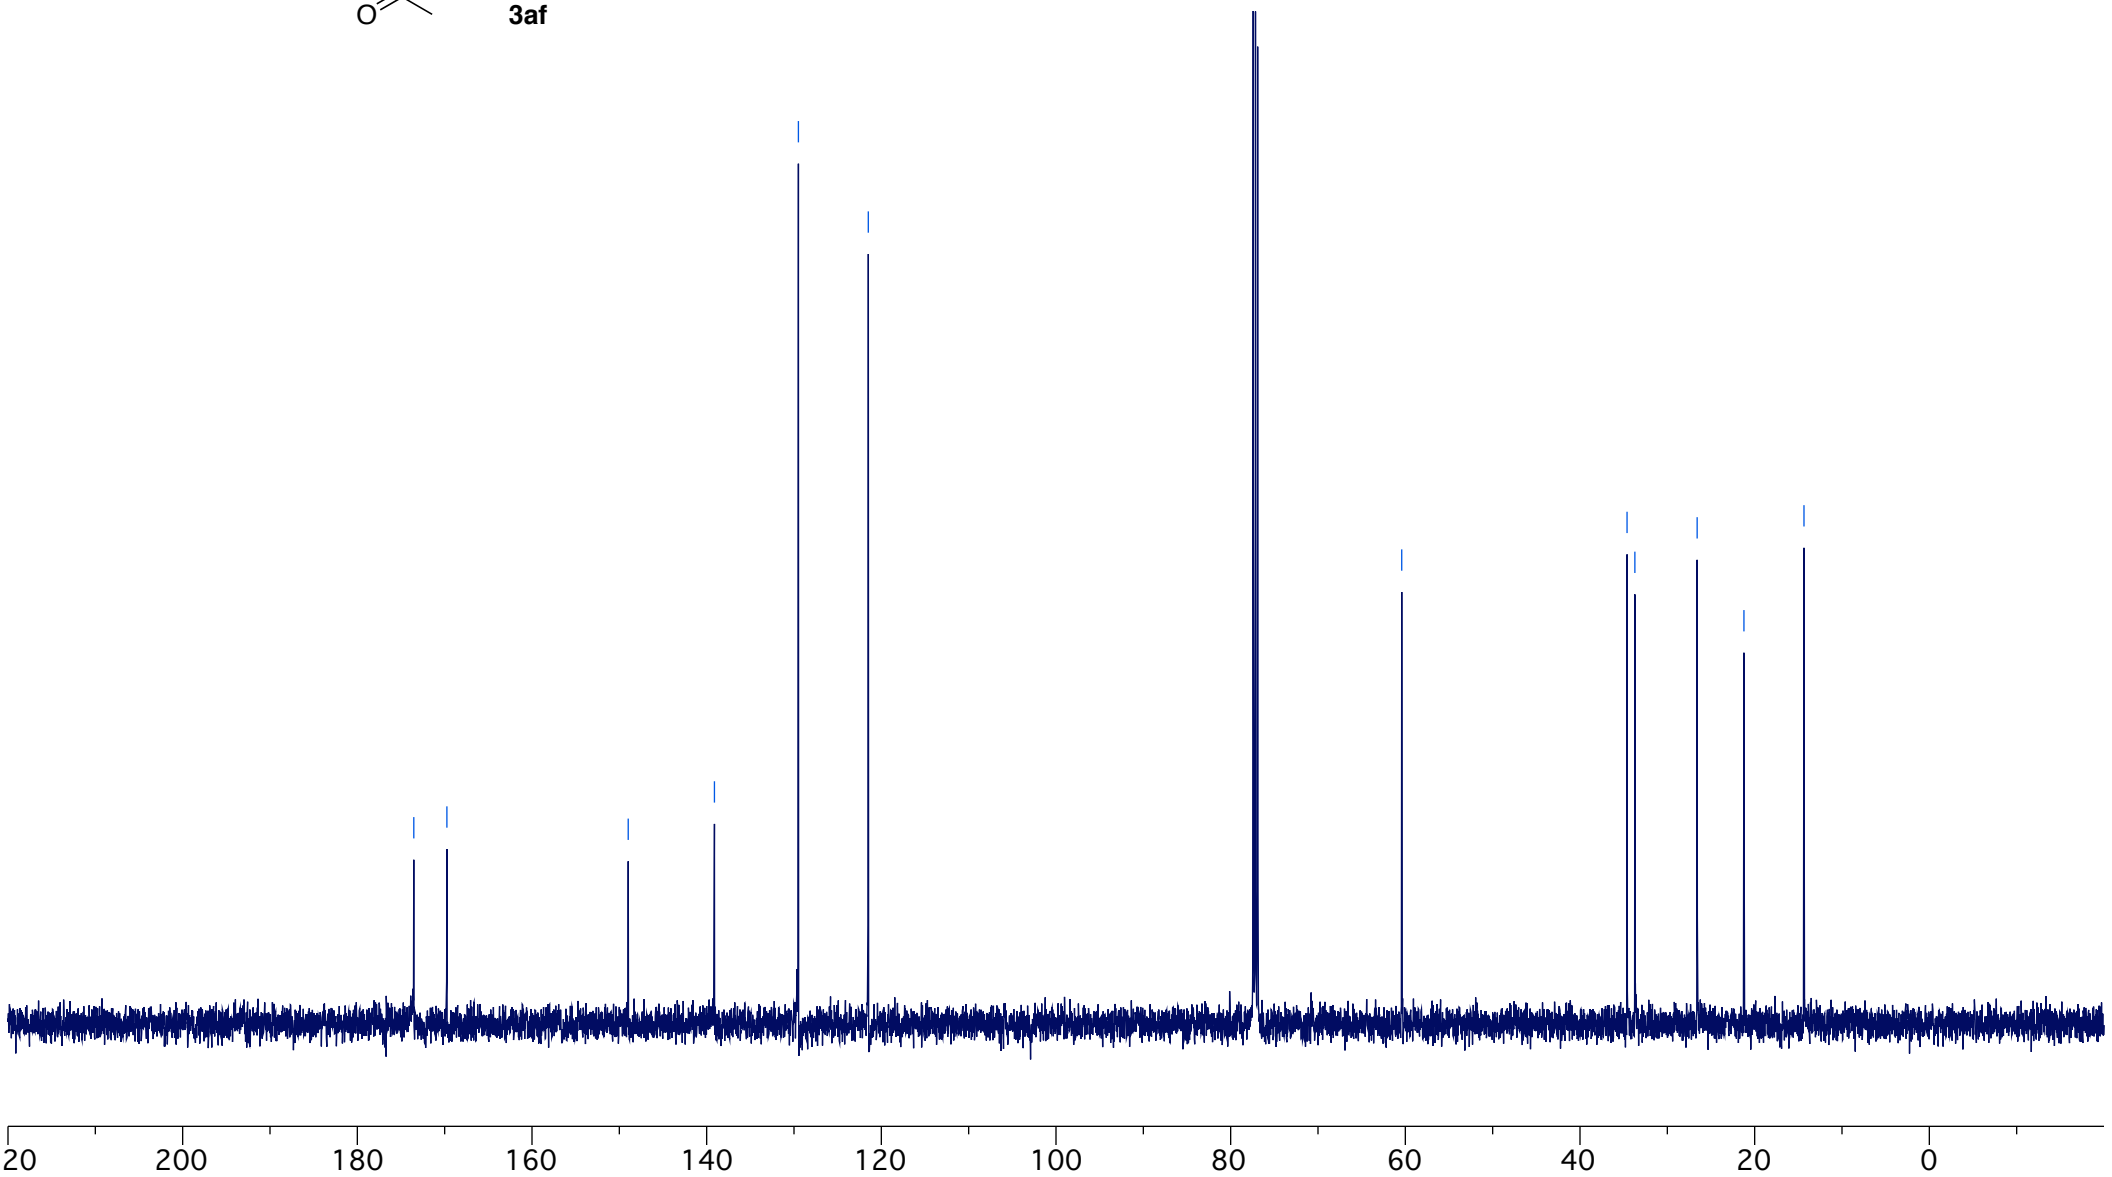

S-124

7.750  
7.735

7.203  
7.187

4.141  
4.127  
4.113  
4.099

2.680  
2.665  
2.649  
2.316  
2.301  
2.287  
1.984  
1.969  
1.954  
1.939  
1.924  
1.335  
1.260  
1.246  
1.232

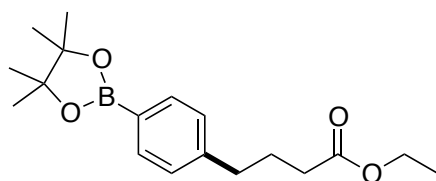

**3ag**

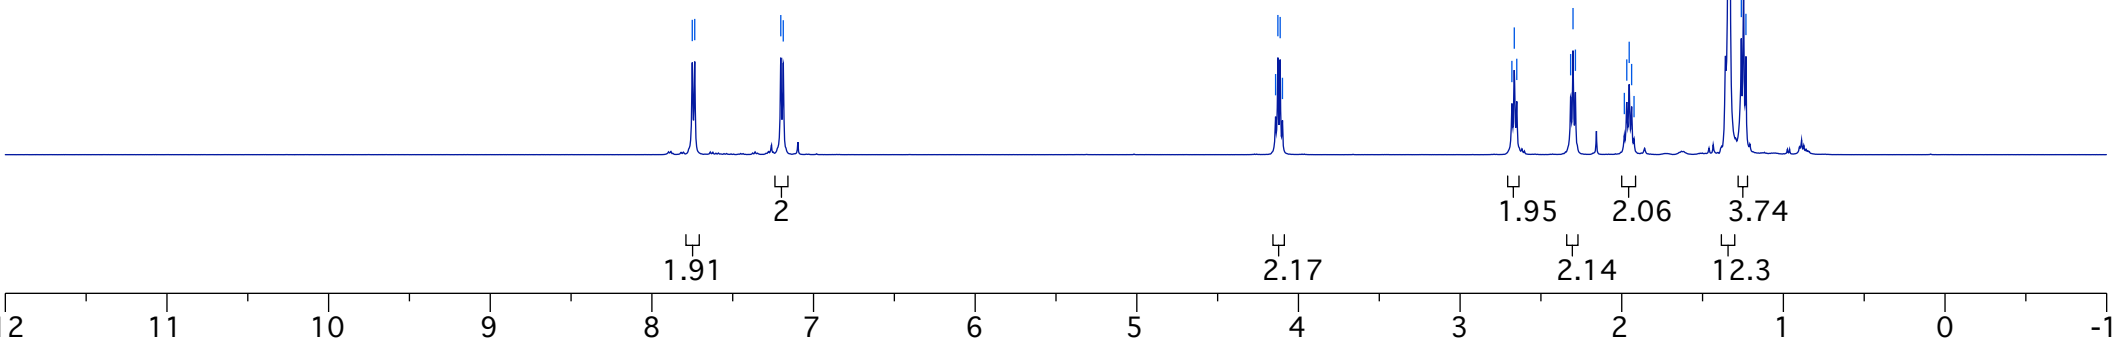

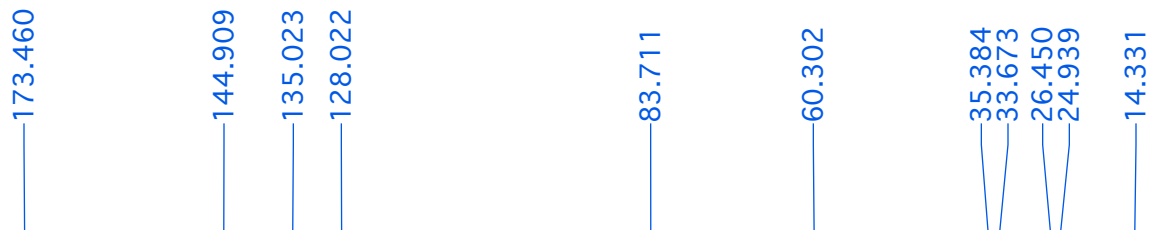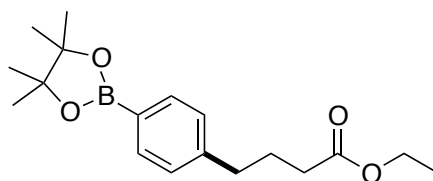

3ag

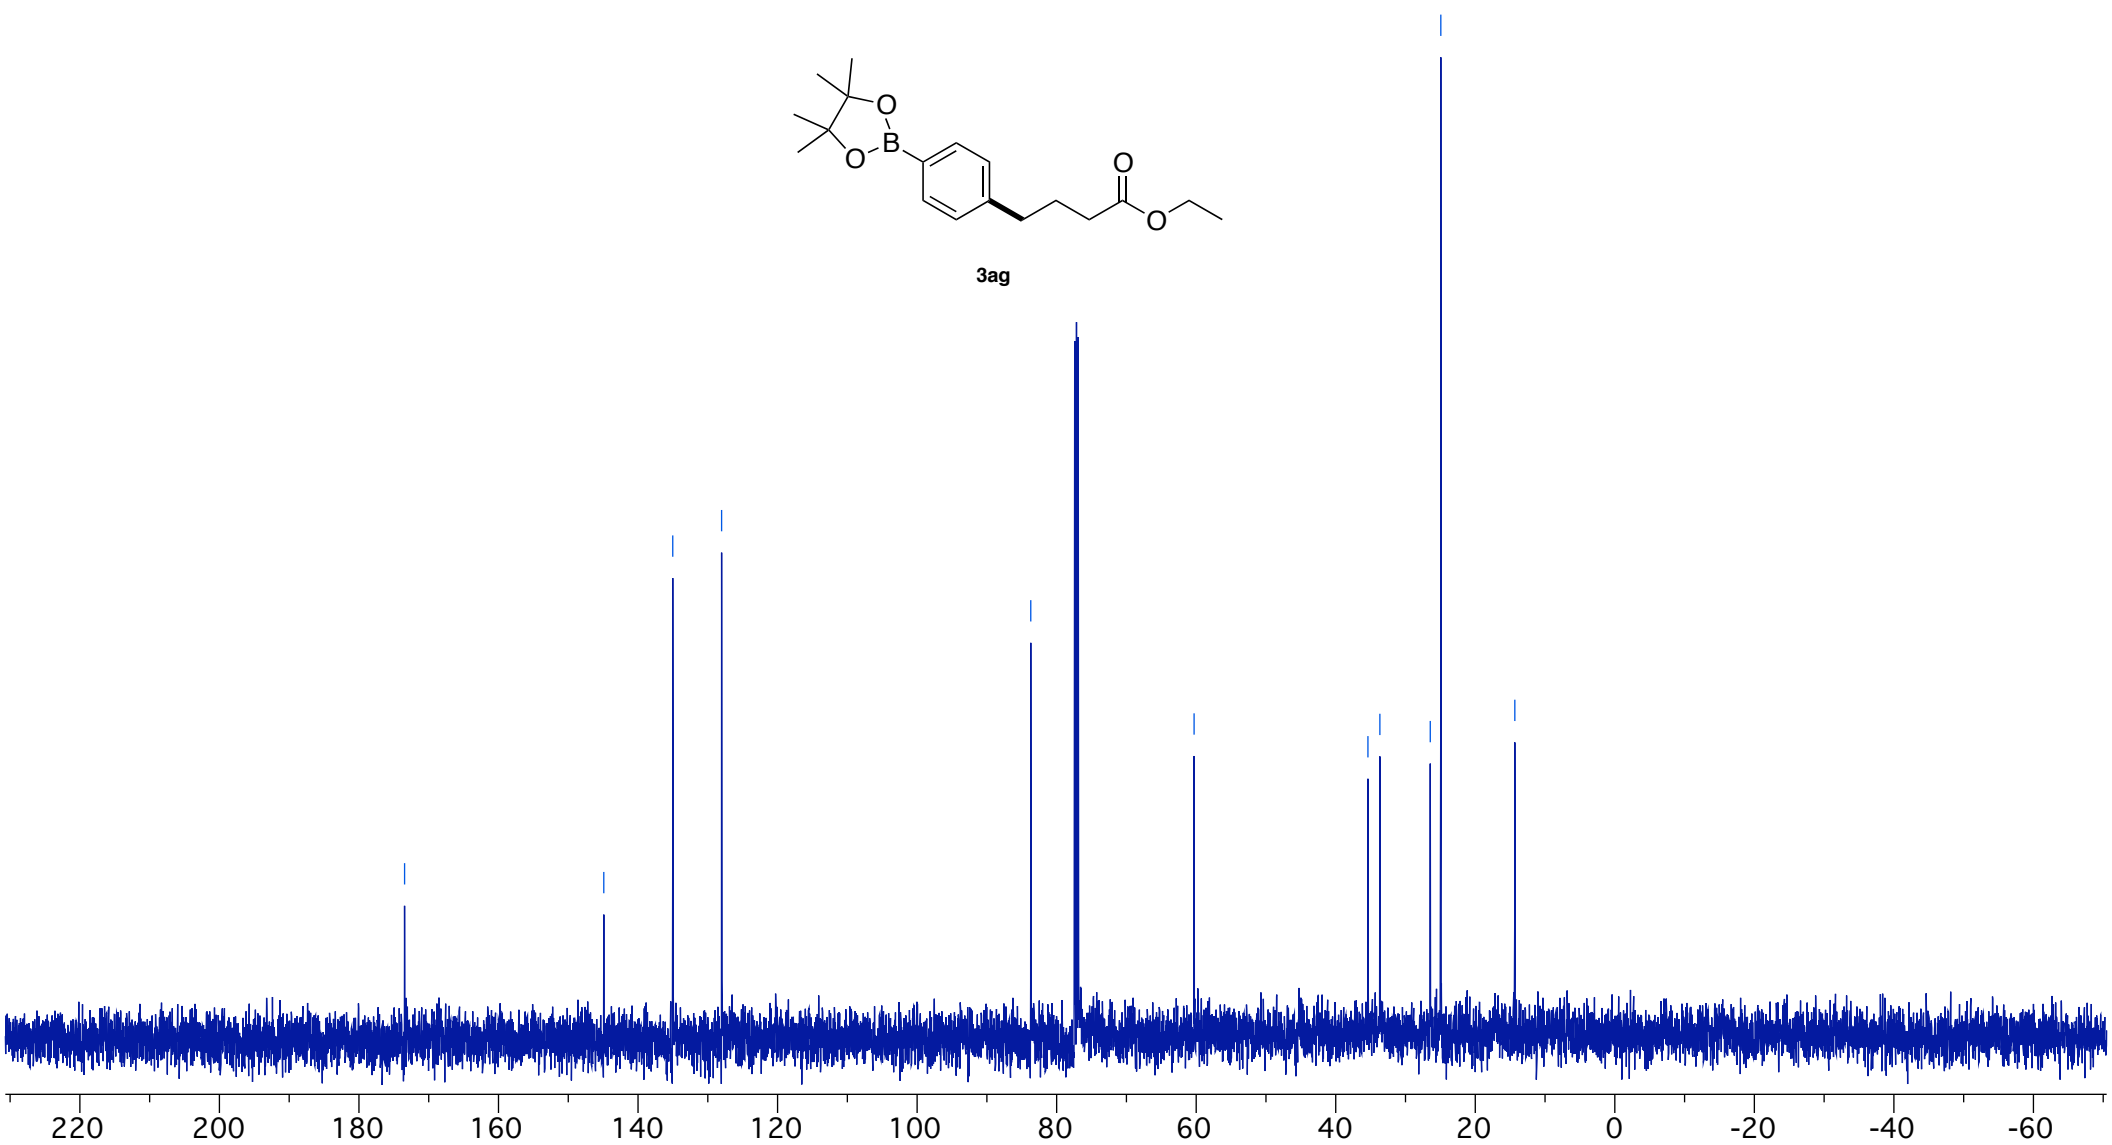

S-126

7.290  
7.275  
7.260  
7.198  
7.184  
7.175  
7.160

2.642  
2.627  
2.611

1.784  
1.768  
1.753  
1.737  
1.722

0.862  
0.846  
0.830

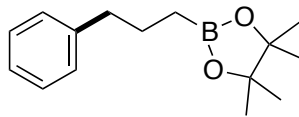

3ah

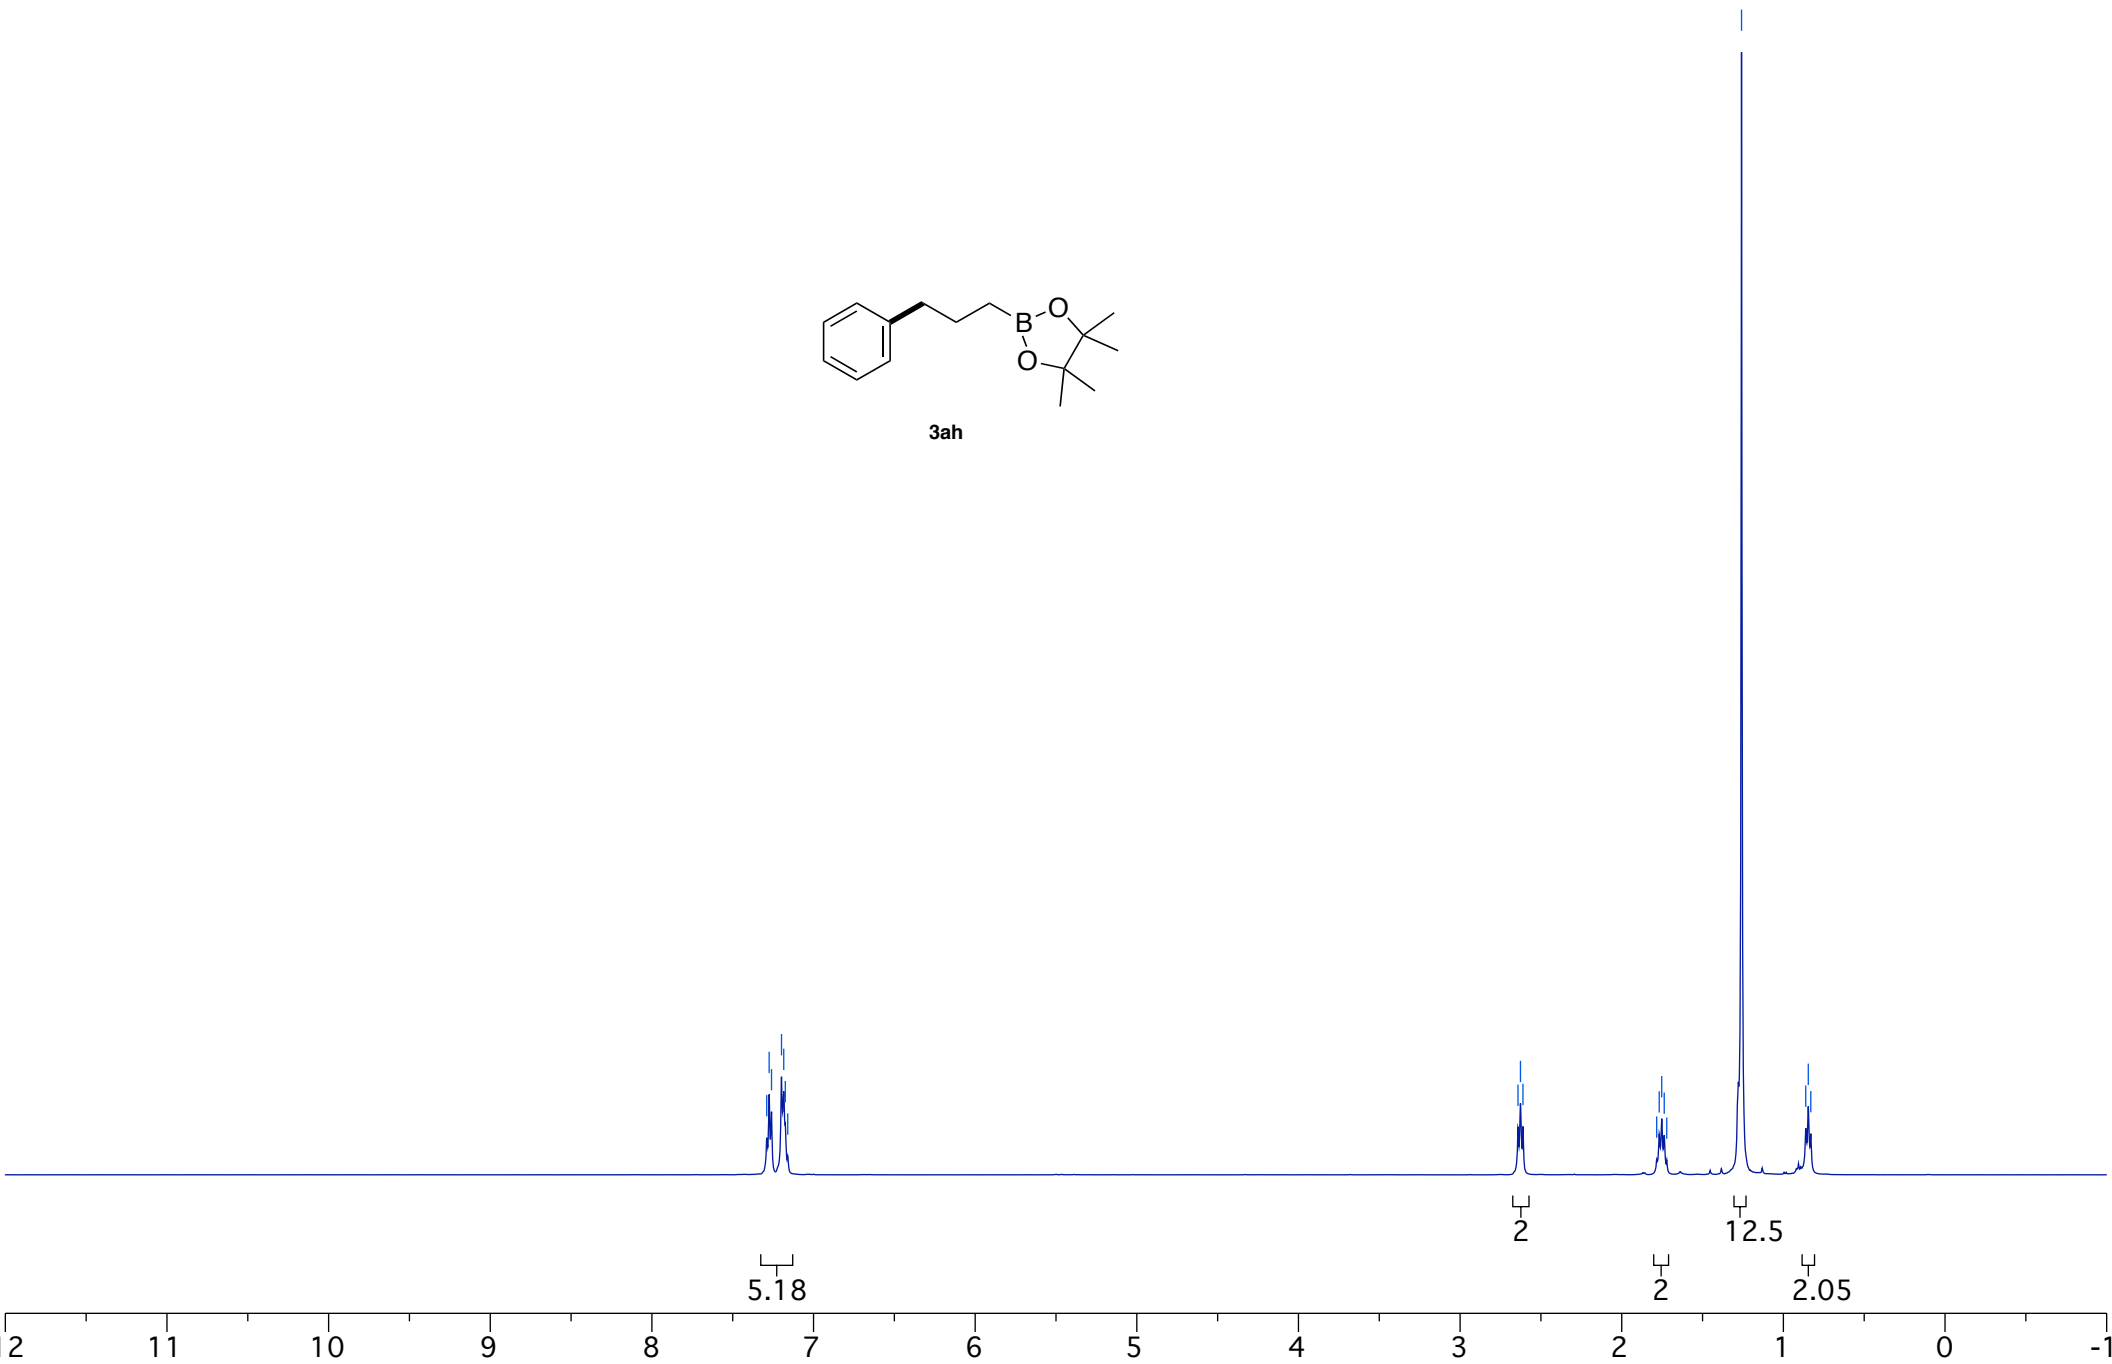

142.816  
128.670  
128.282  
125.679  
83.045  
38.726  
26.240  
24.968

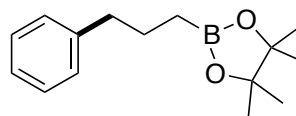

3ah

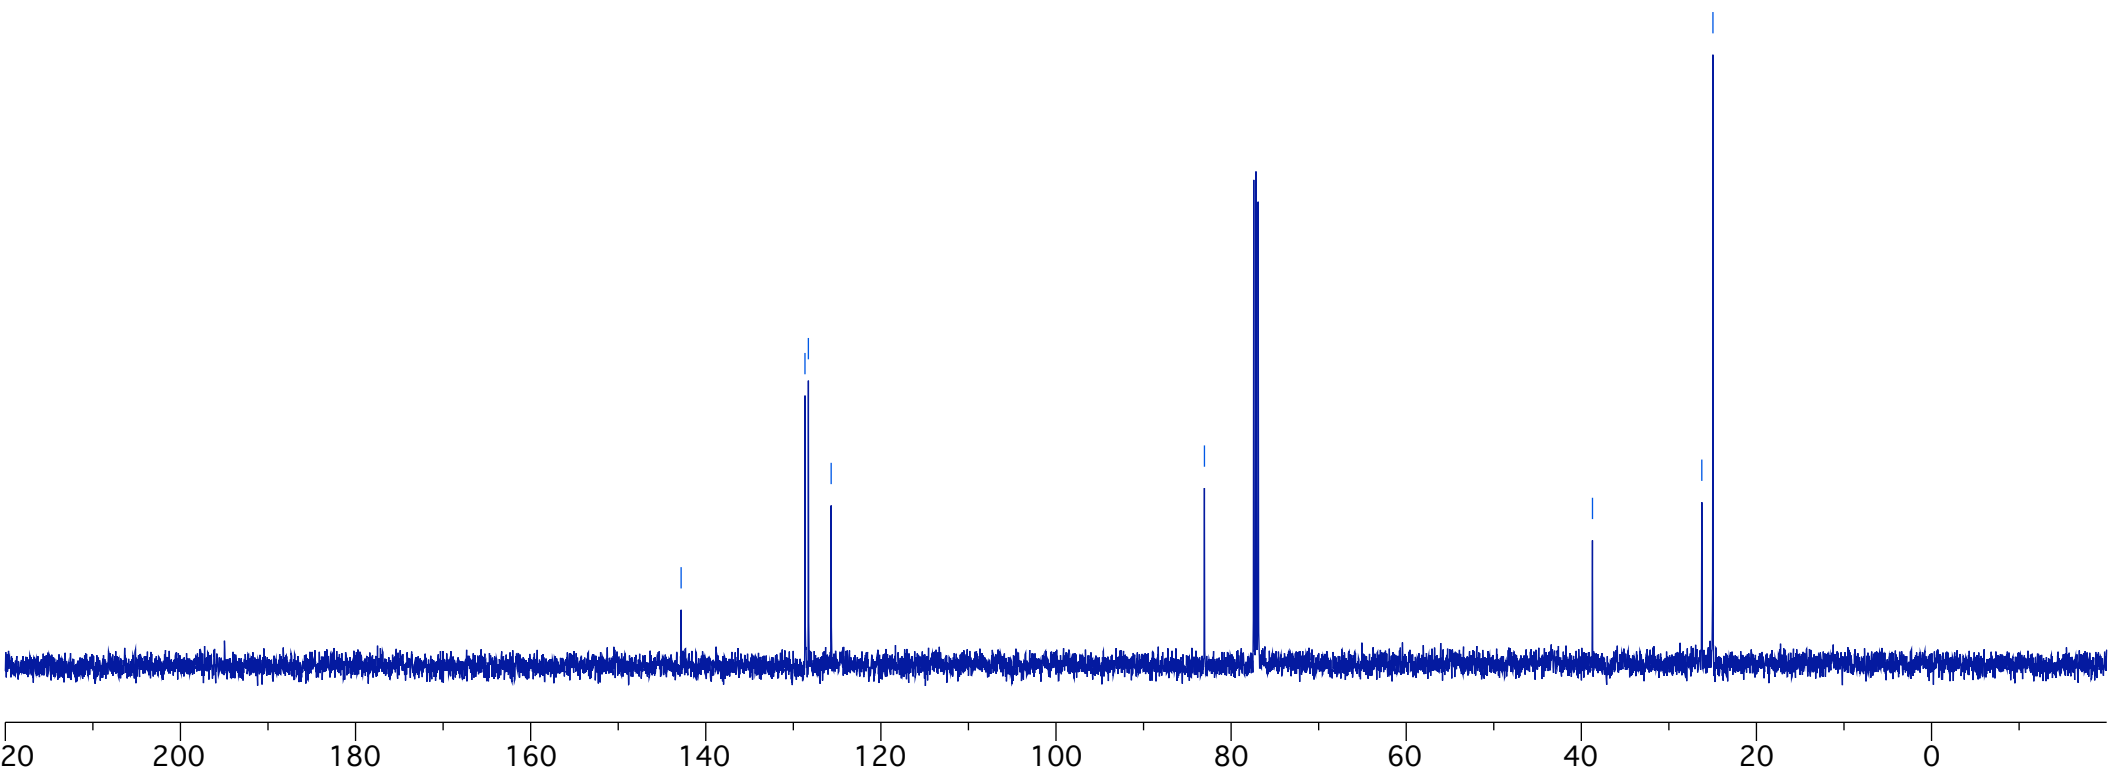

S-128

7.533  
7.514  
7.222  
7.203

4.150  
4.132  
4.114  
4.097

2.675  
2.657  
2.637  
2.339  
2.321  
2.302  
1.996  
1.976  
1.958  
1.939  
1.920  
1.765  
1.270  
1.252  
1.234

0.399

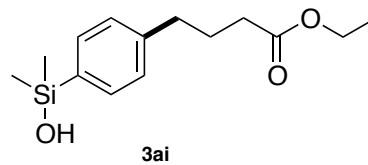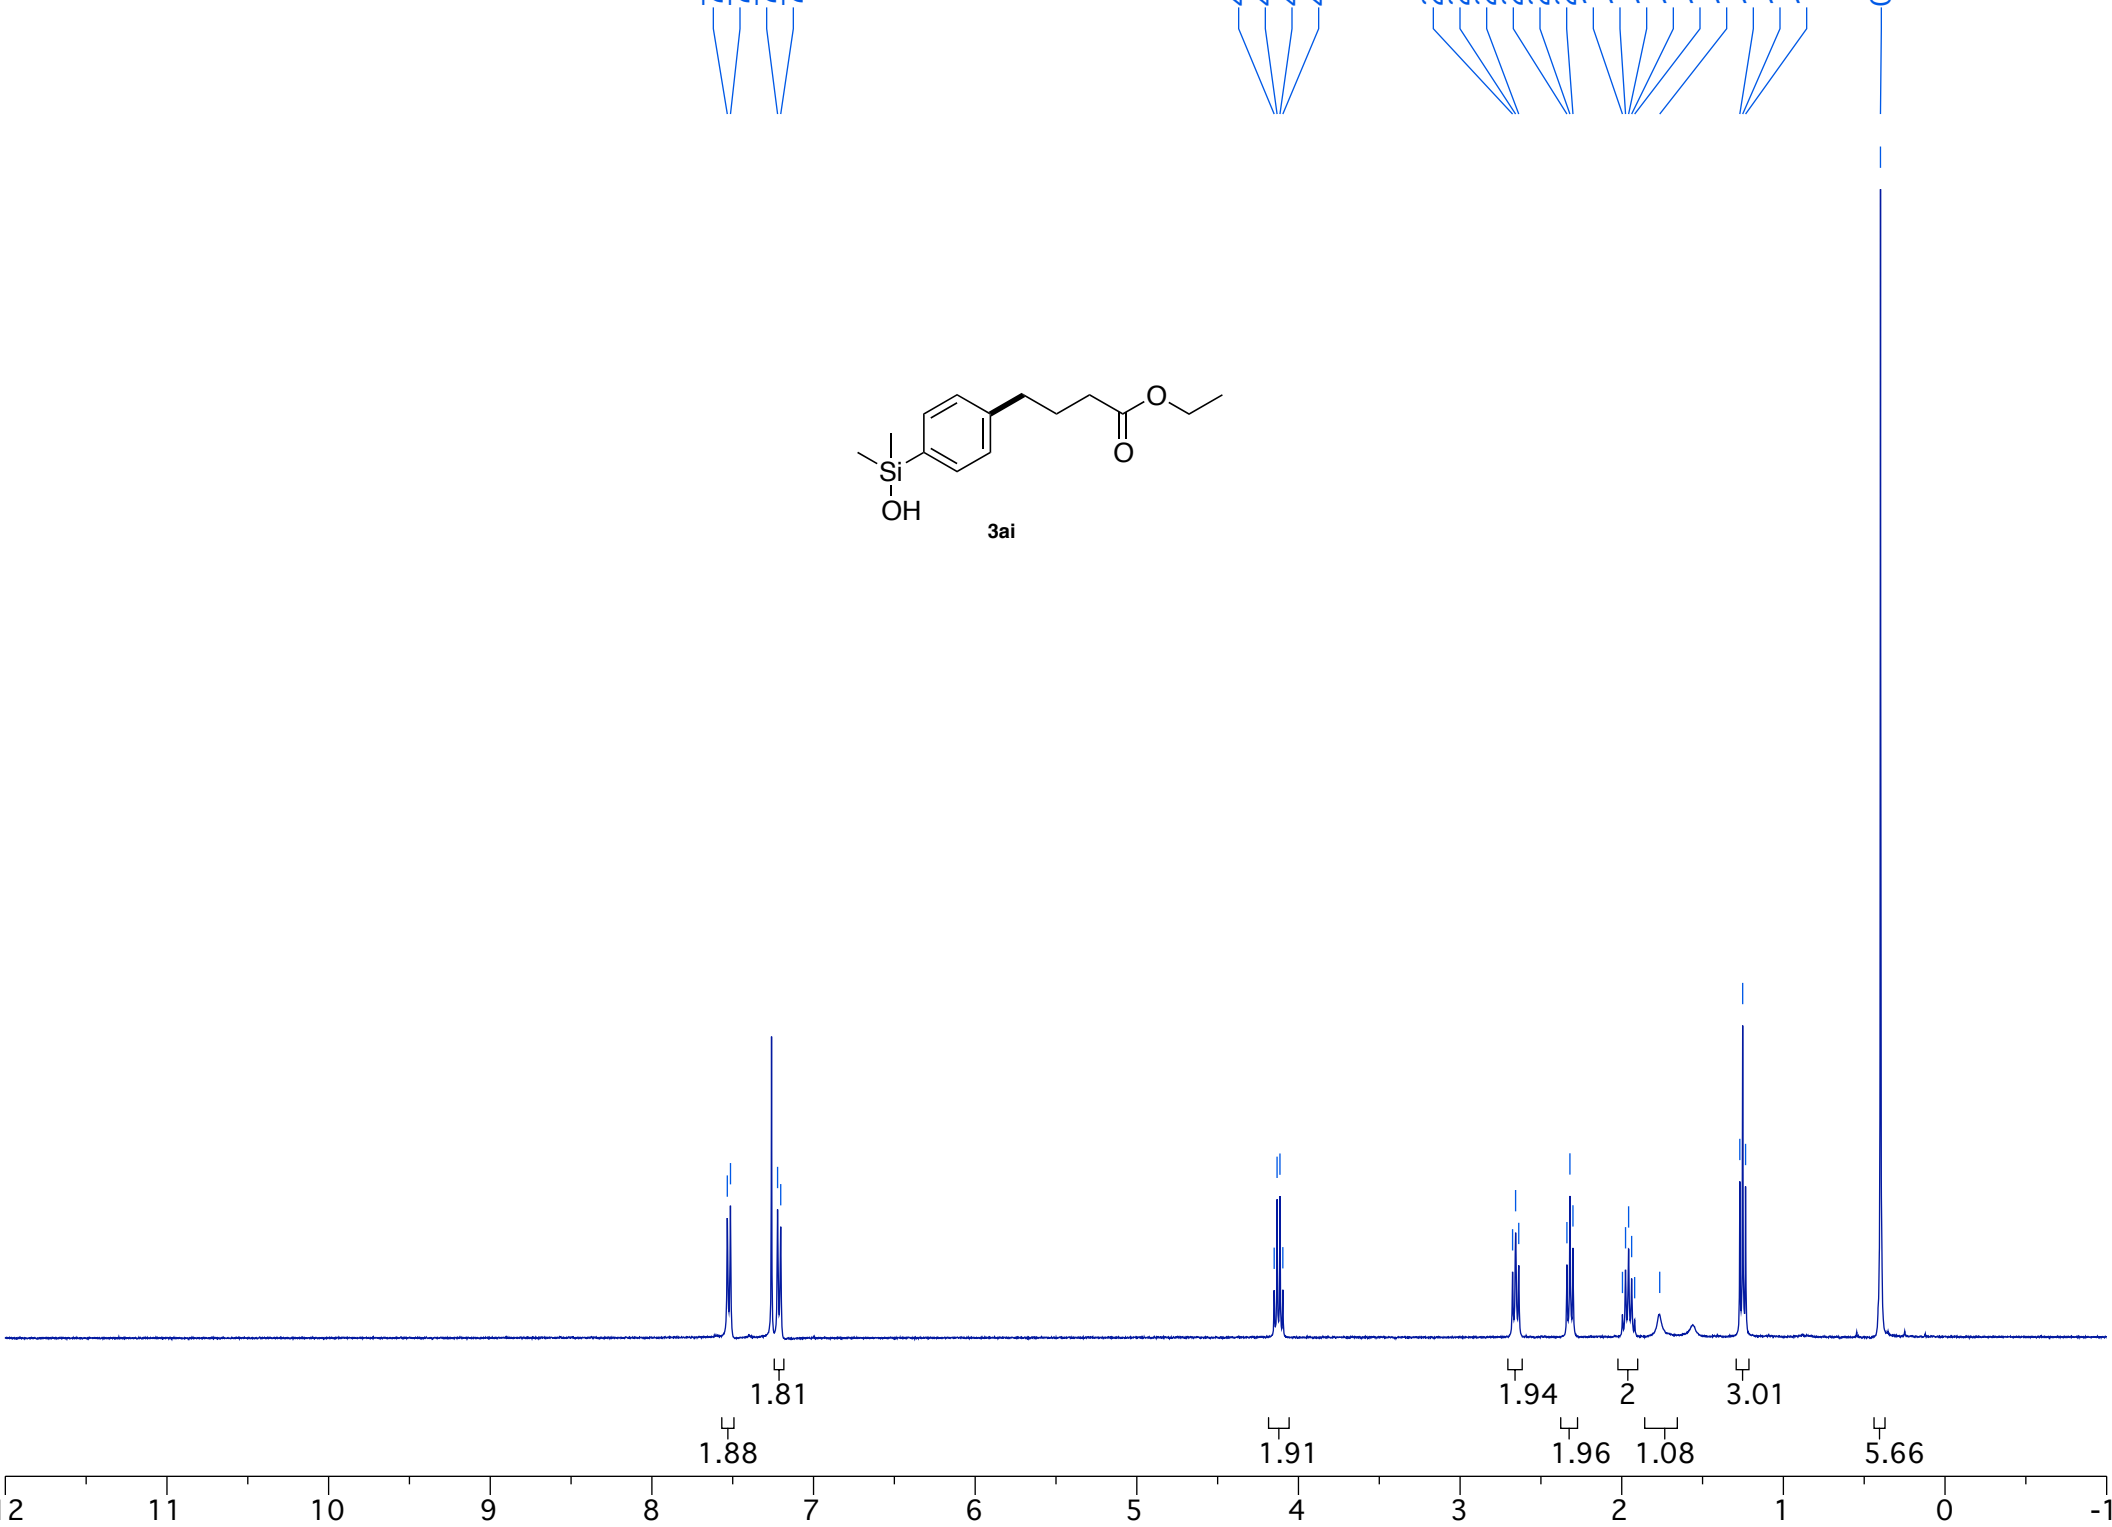



S-129

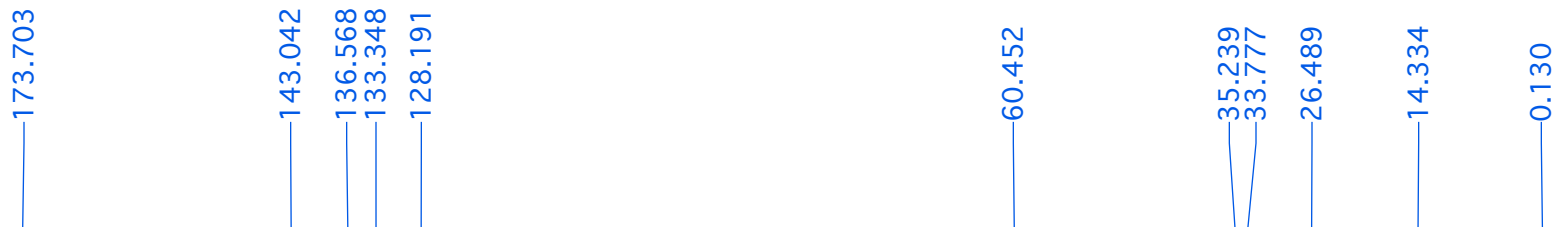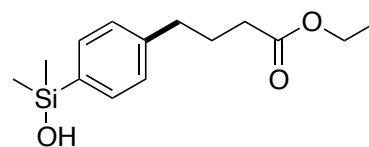

3ai

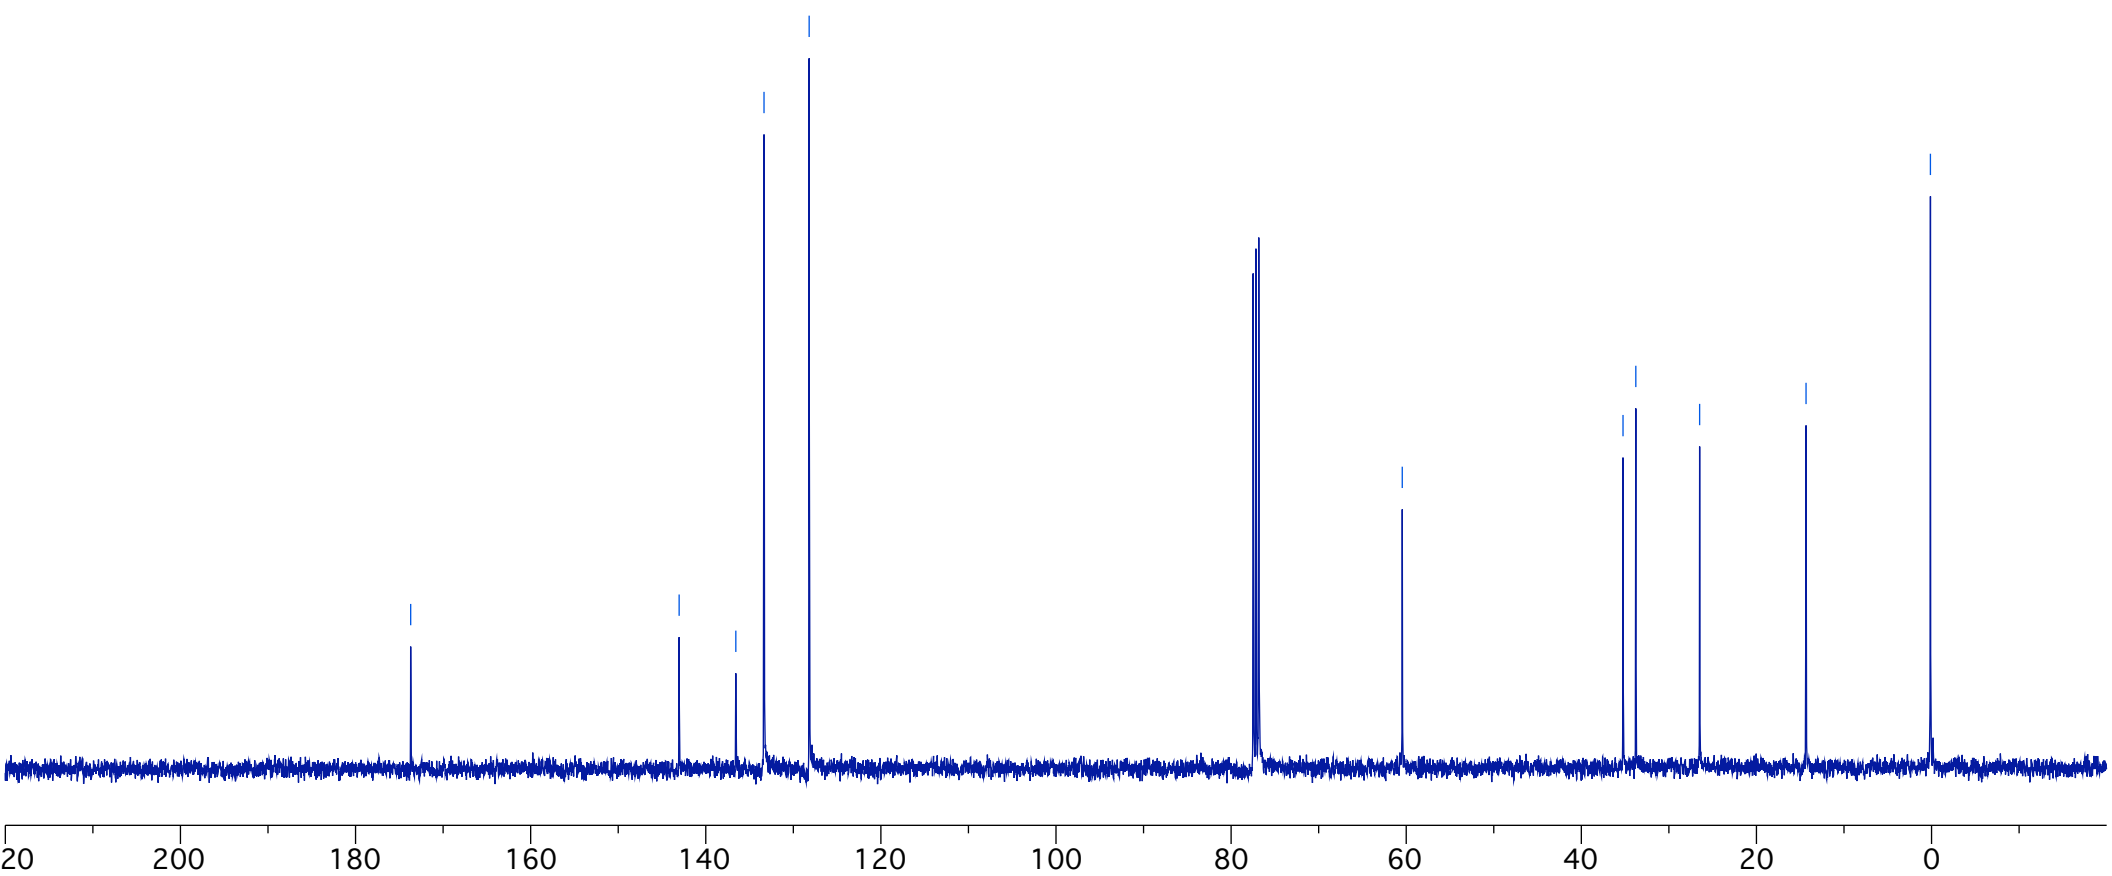

7.481  
7.463  
7.426  
7.407  
7.371  
7.353  
7.183  
7.164

4.149  
4.131  
4.113  
4.095

2.651  
2.633  
2.613  
2.342  
2.324  
2.305  
1.989  
1.970  
1.951  
1.932  
1.914  
1.268  
1.251  
1.233

0.340  
0.338  
0.272  
0.203

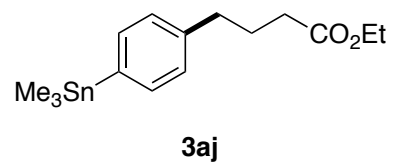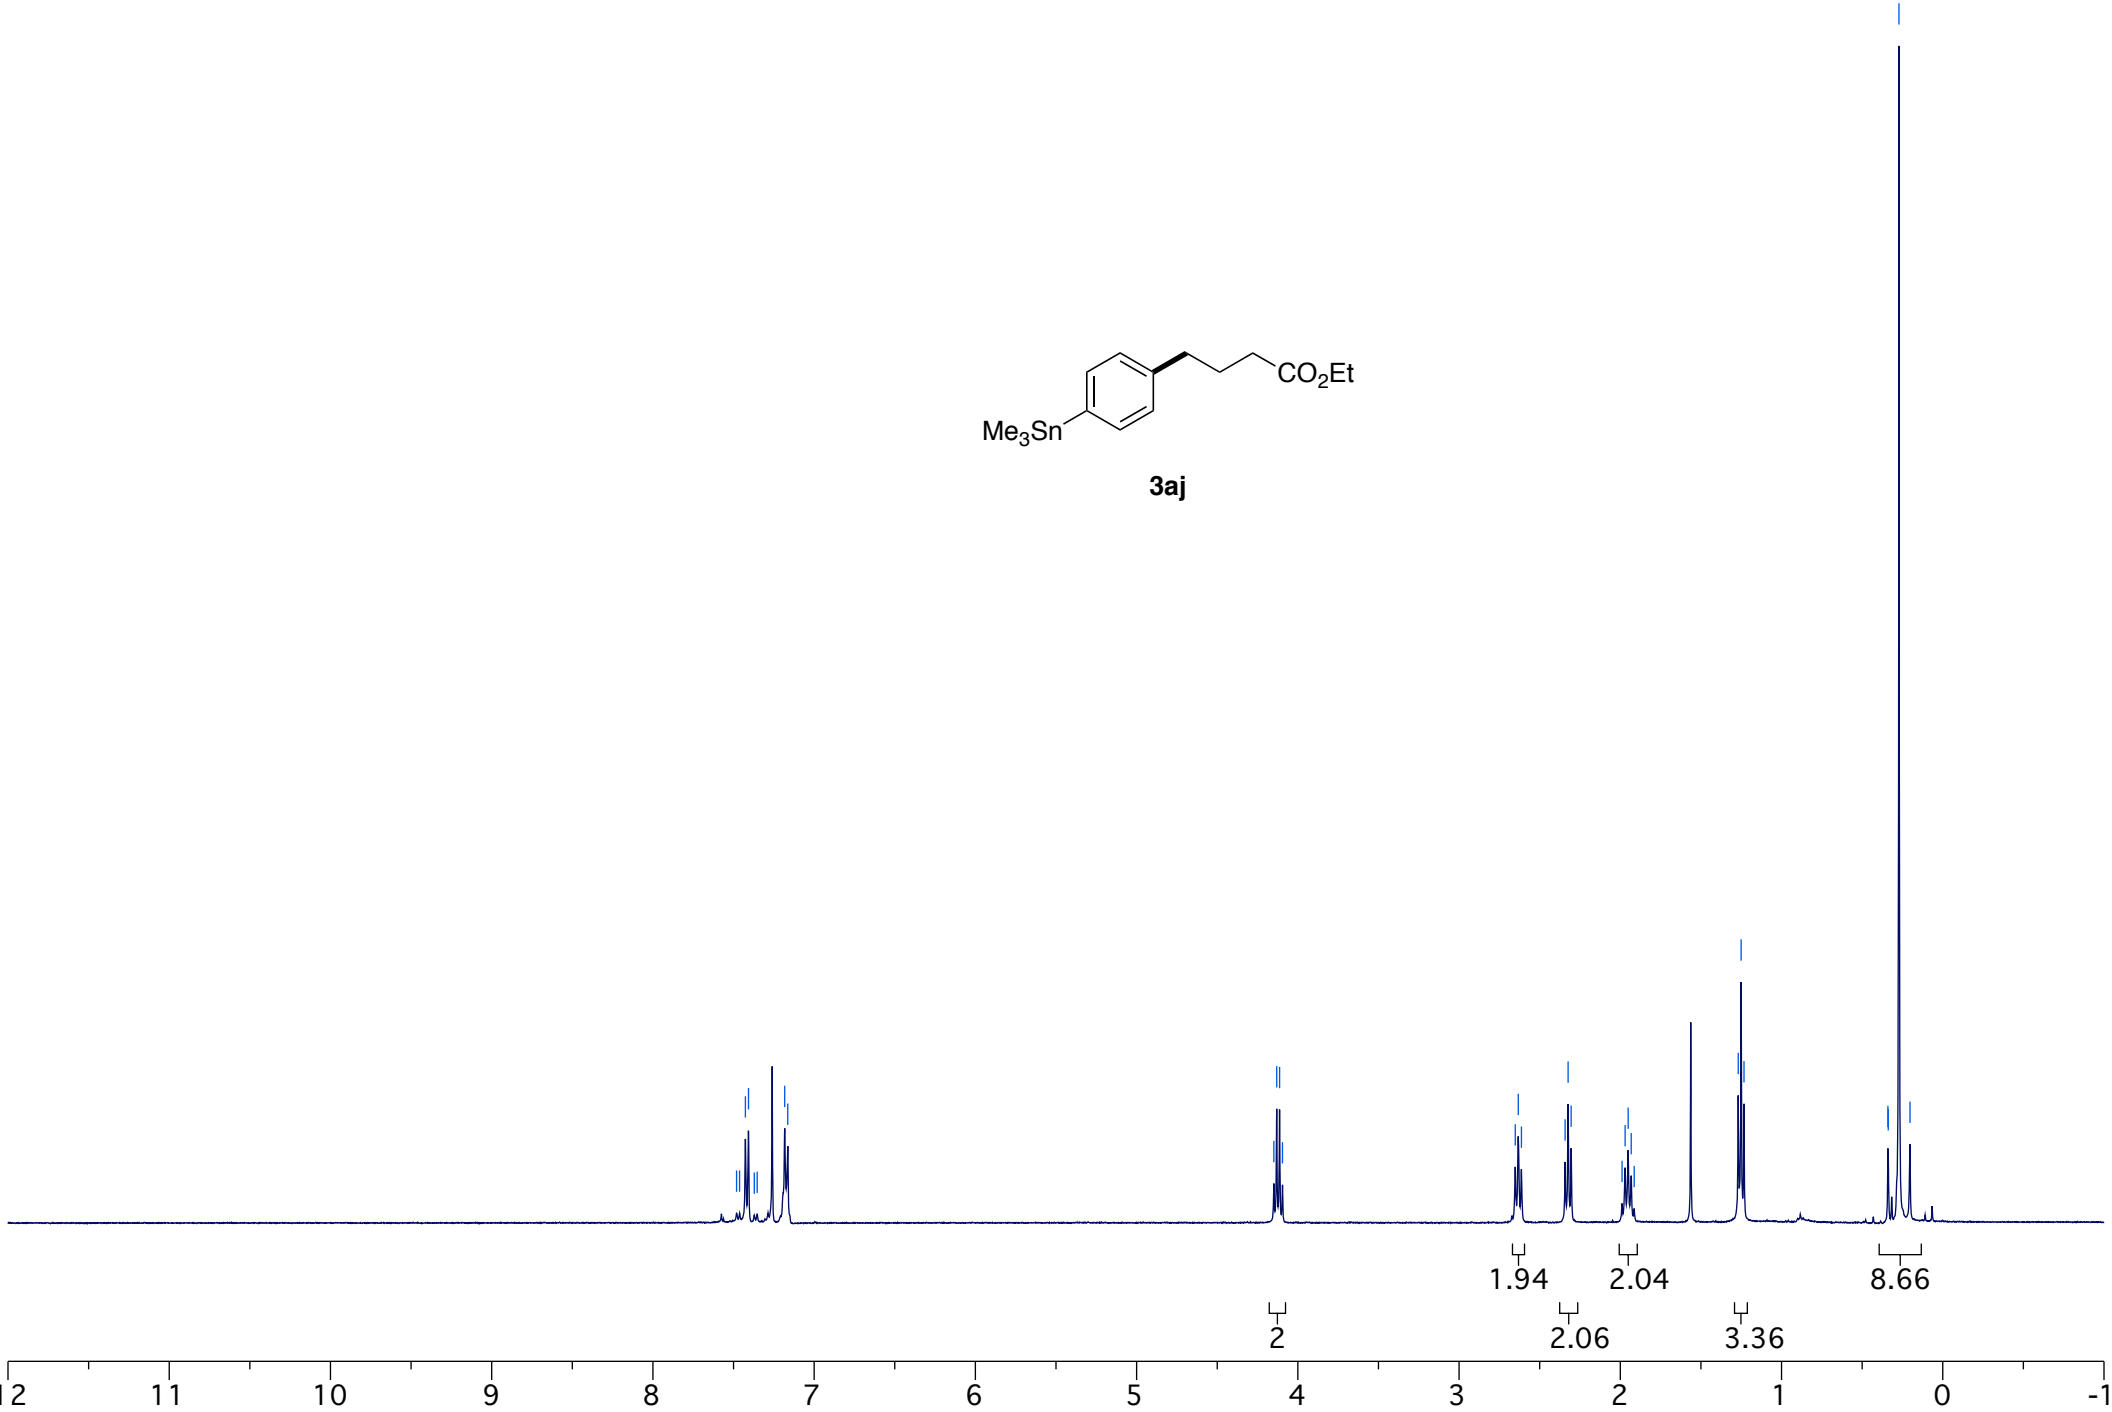

S-131

173.533

141.585

139.240

136.006

128.439

60.318

35.213

33.814

26.636

14.365

9.487

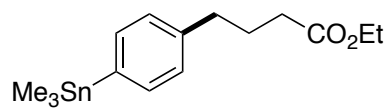

**3aj**

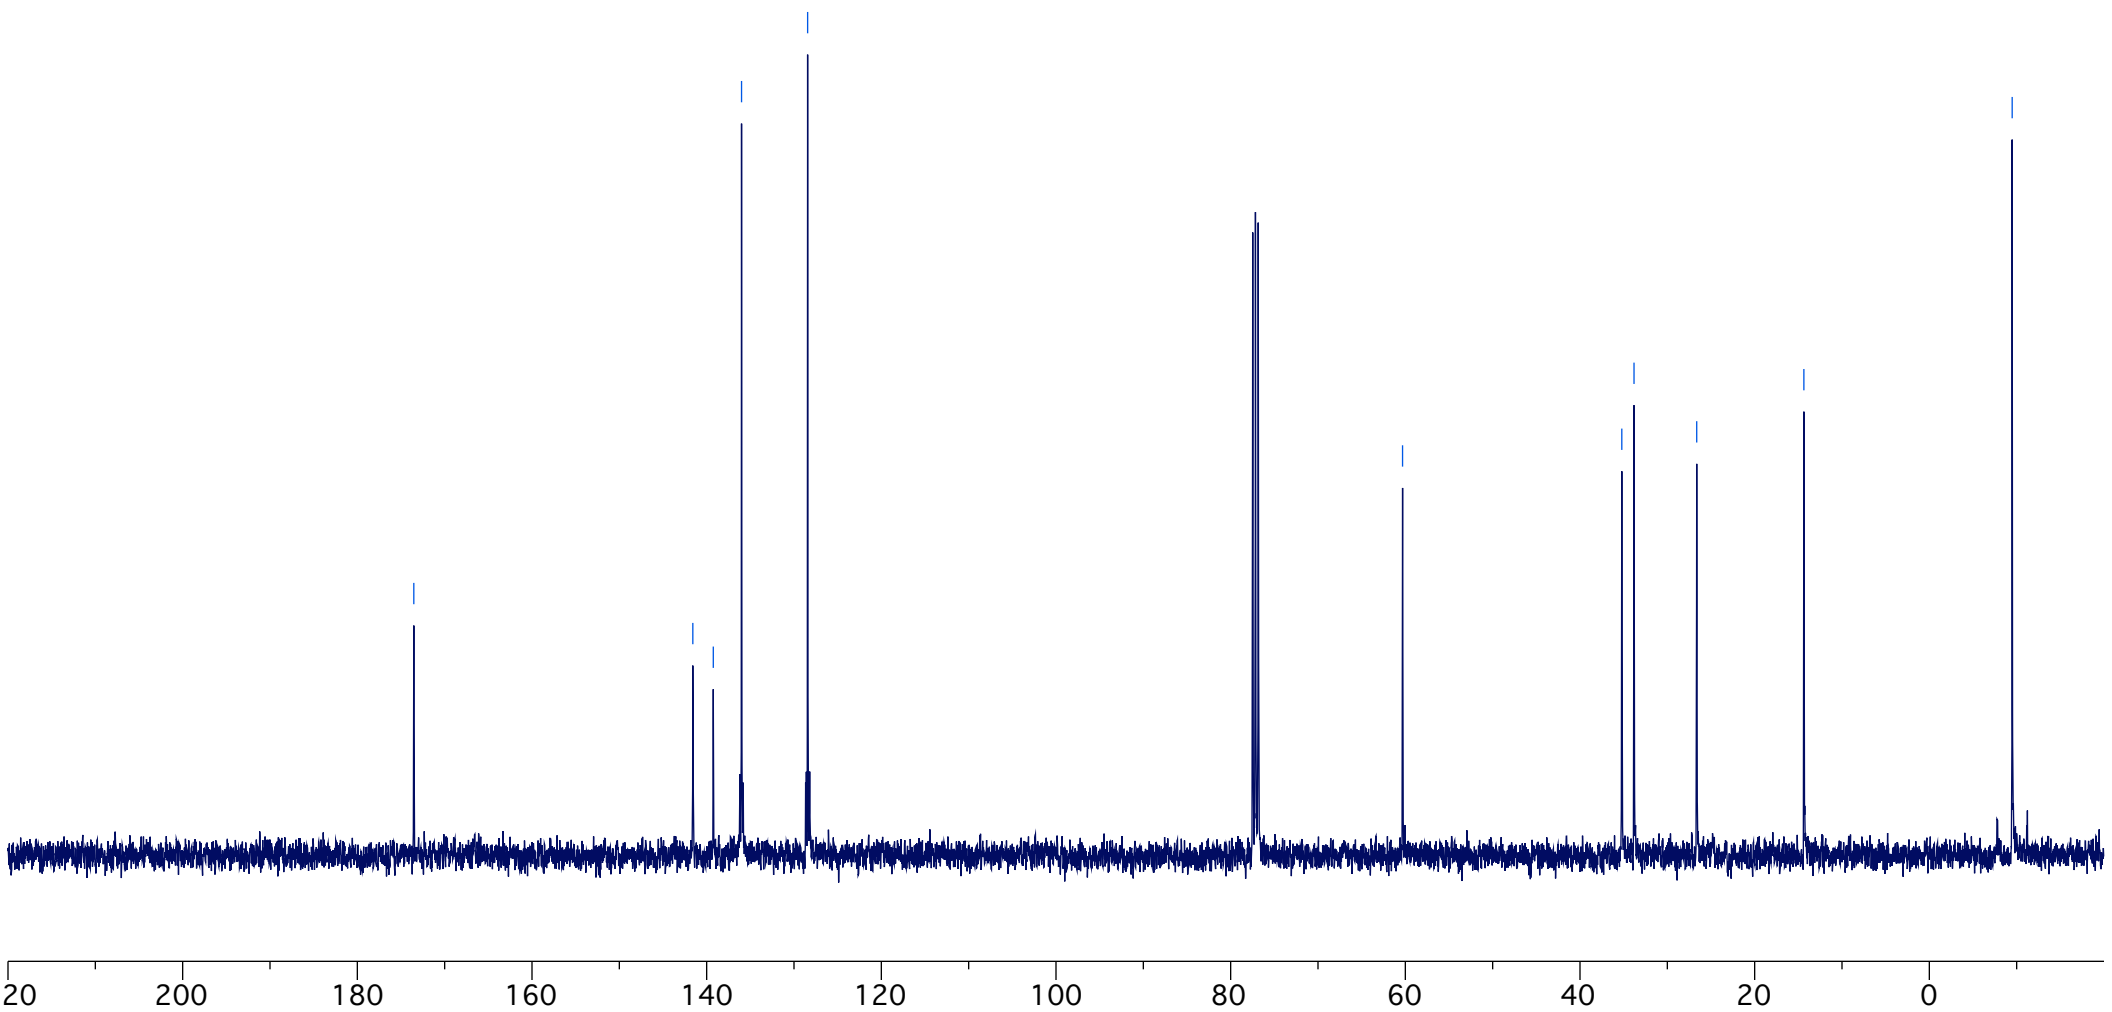

S-132

8.336  
8.322  
7.389  
7.384  
7.359  
7.181  
7.179  
7.165  
7.162  
6.581  
6.574  
4.142  
4.128  
4.113  
4.099  
2.757  
2.742  
2.727  
2.613  
2.337  
2.322  
2.307  
2.022  
2.007  
1.992  
1.977  
1.962  
1.262  
1.248  
1.234

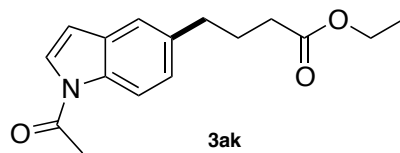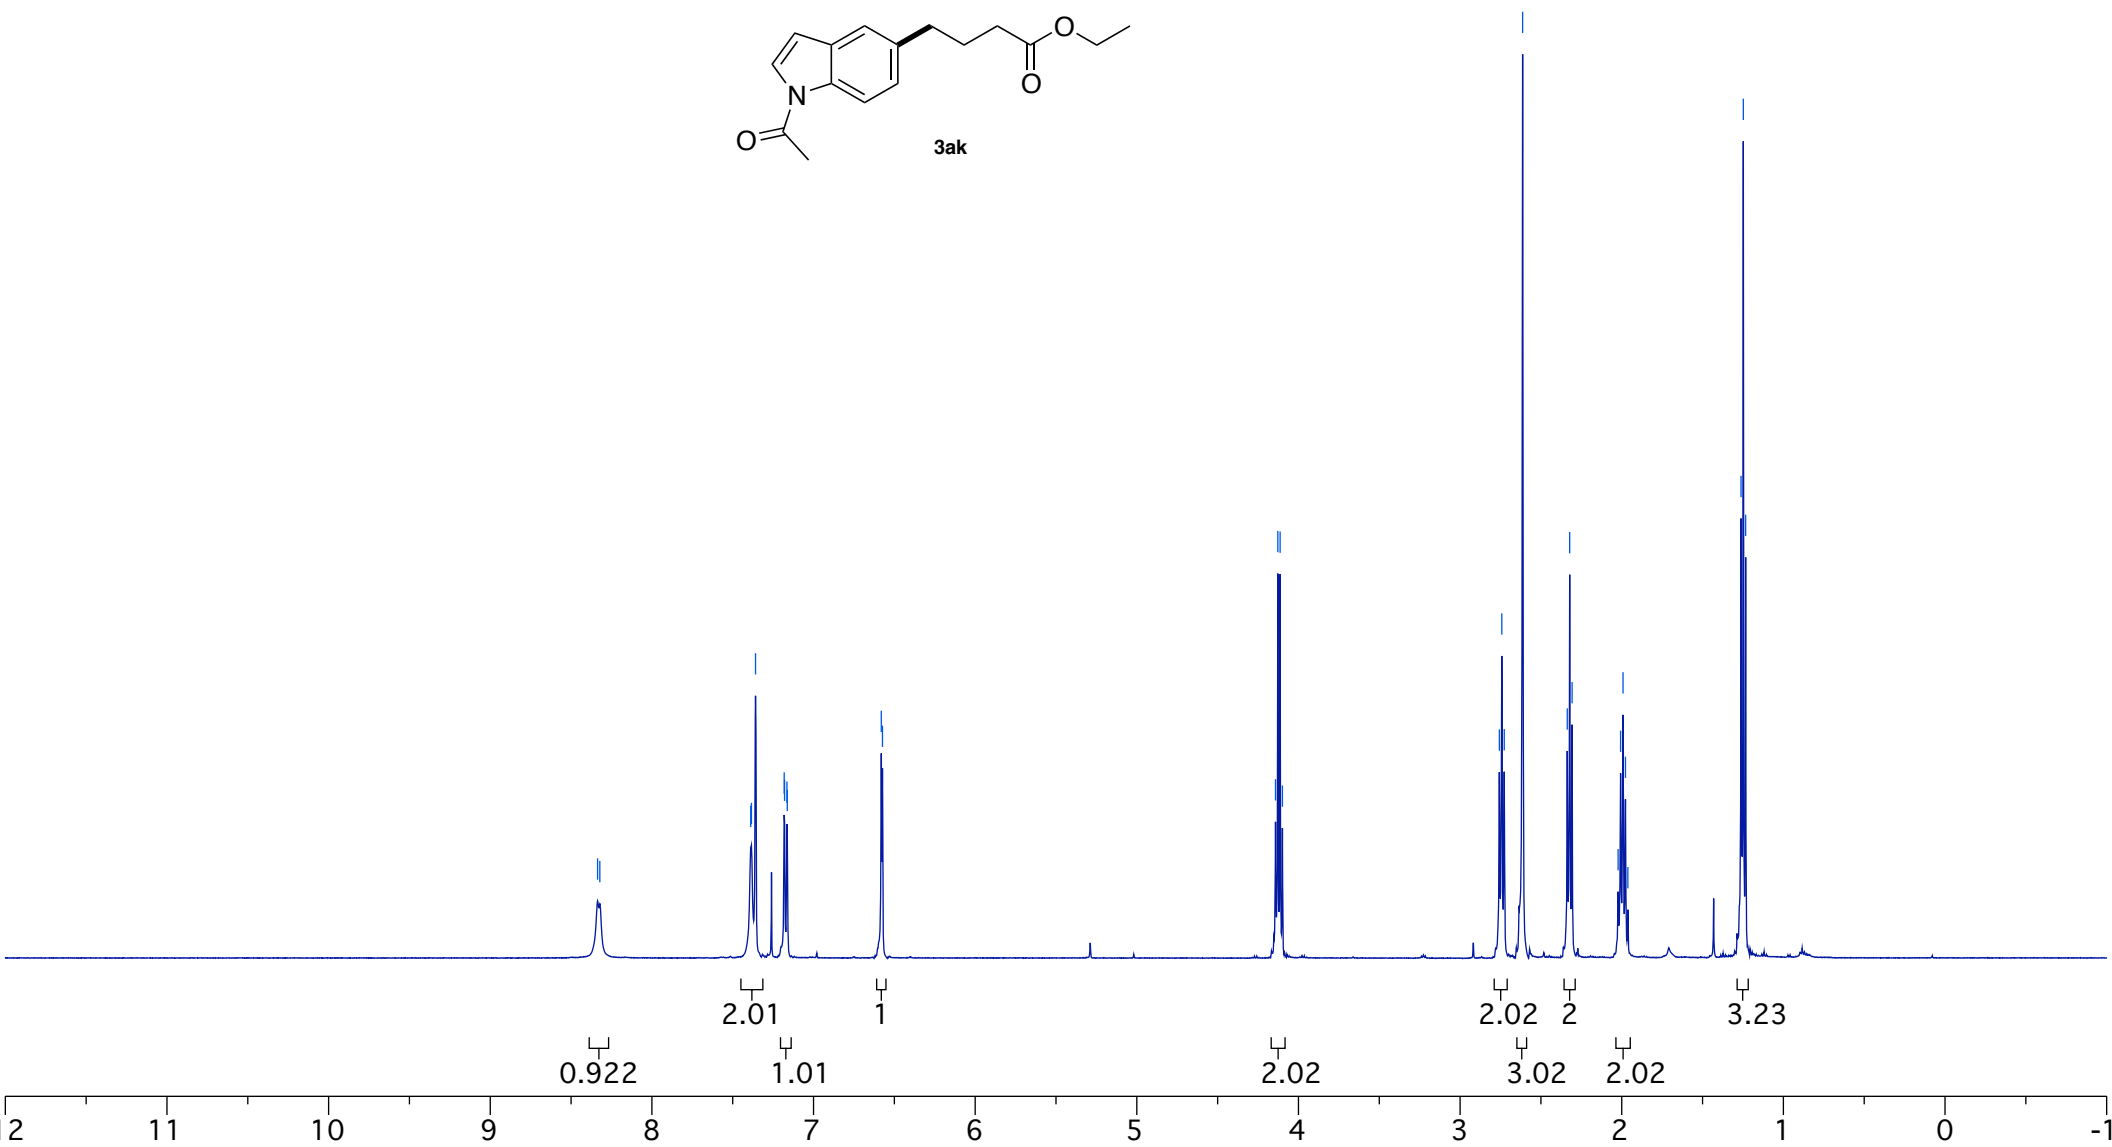

S-133

173.640  
168.567

137.003  
134.201  
130.778  
125.950  
125.496  
120.451  
116.433  
109.109

60.354

35.145  
33.738  
27.046  
23.986

14.367

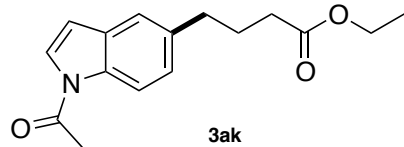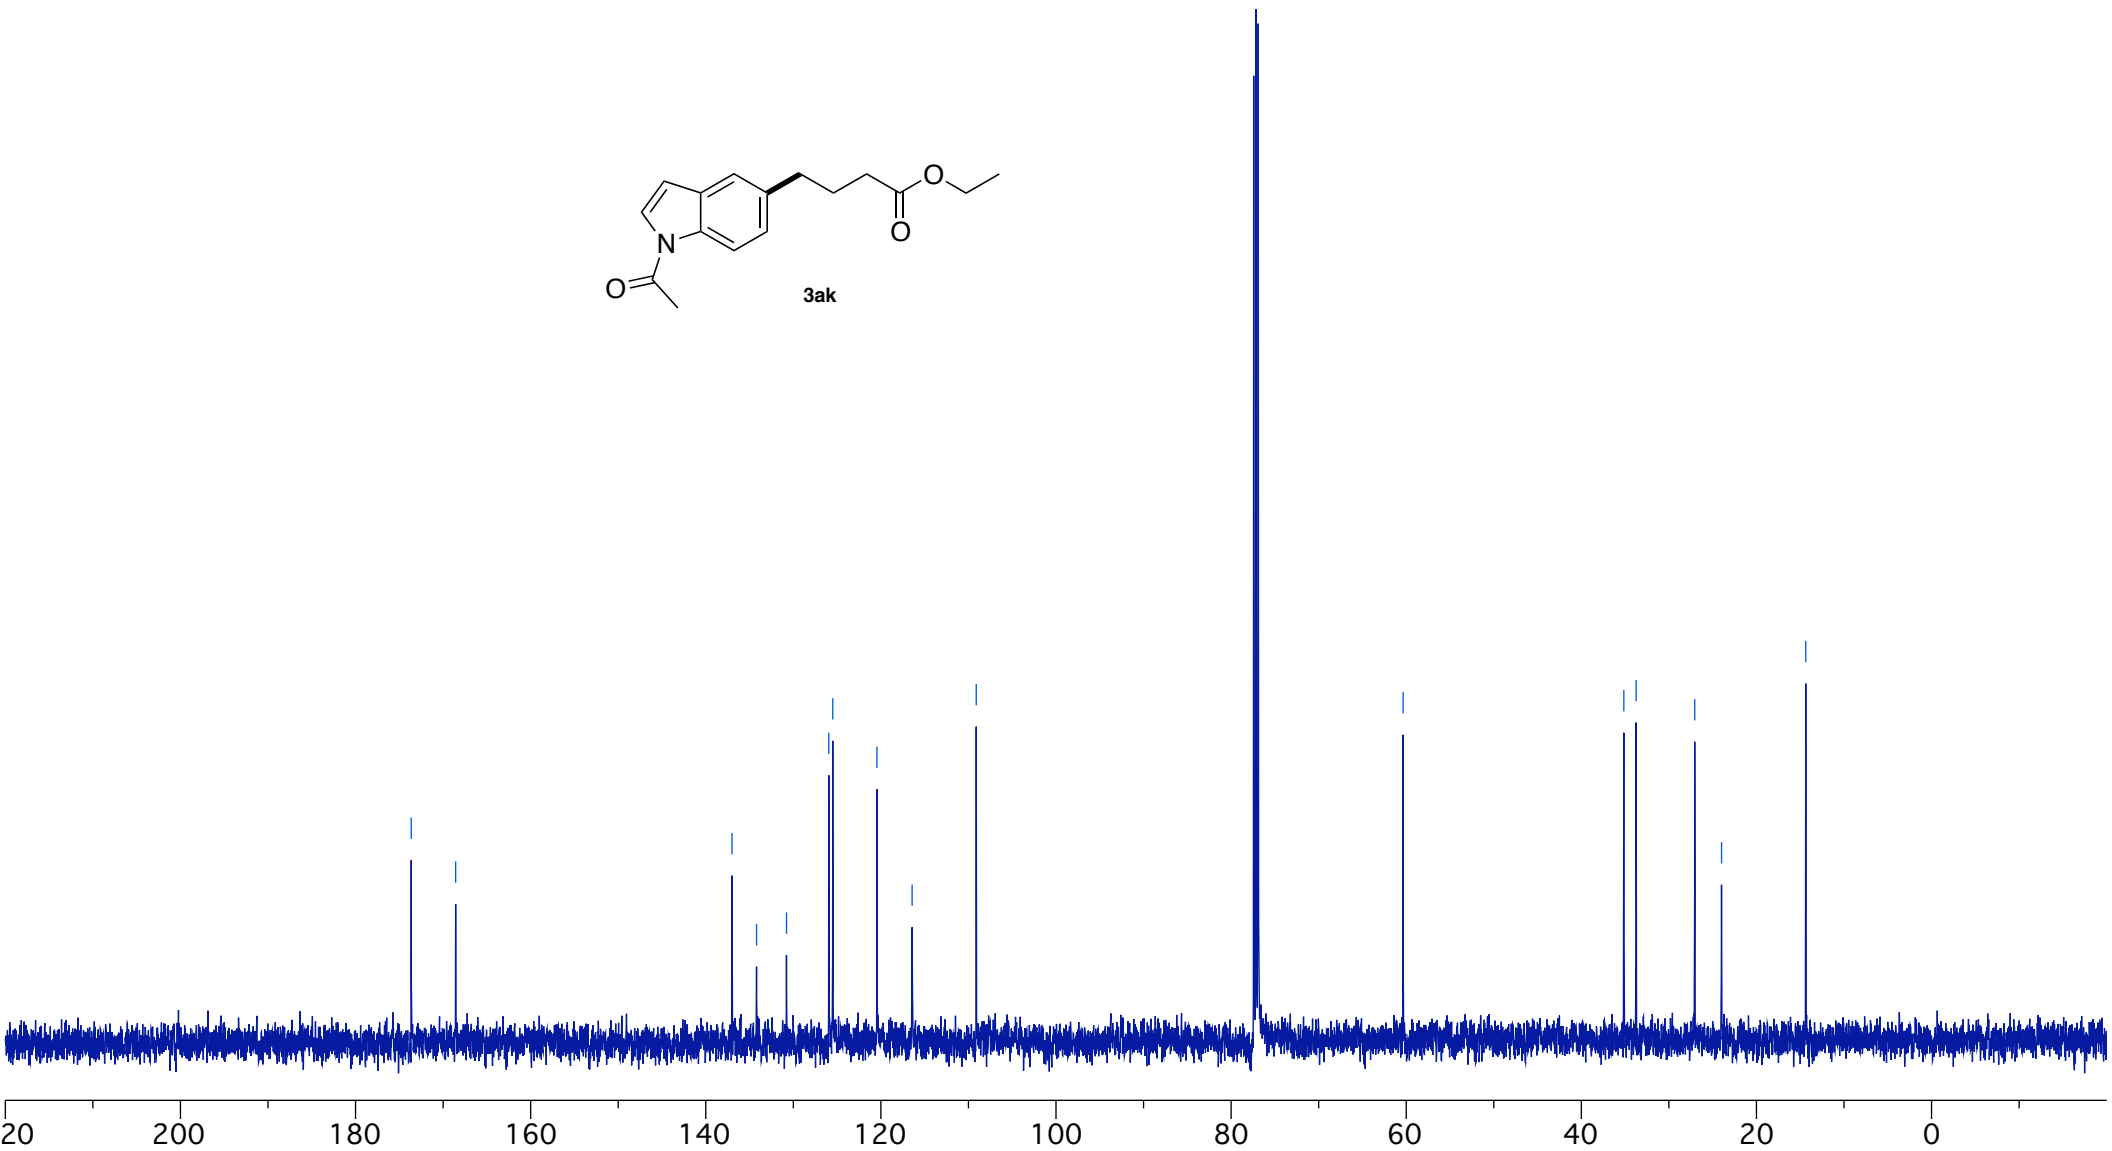

S-134

7.497  
7.482  
7.467  
6.978  
6.963  
6.949

4.142  
4.128  
4.114  
4.100

2.806  
2.791  
2.776  
2.527  
2.370  
2.355  
2.340  
2.079  
2.064  
2.048  
2.042  
2.034  
2.019  
1.263  
1.249  
1.235

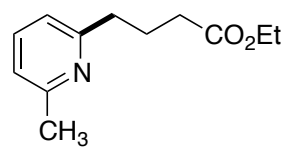

3al

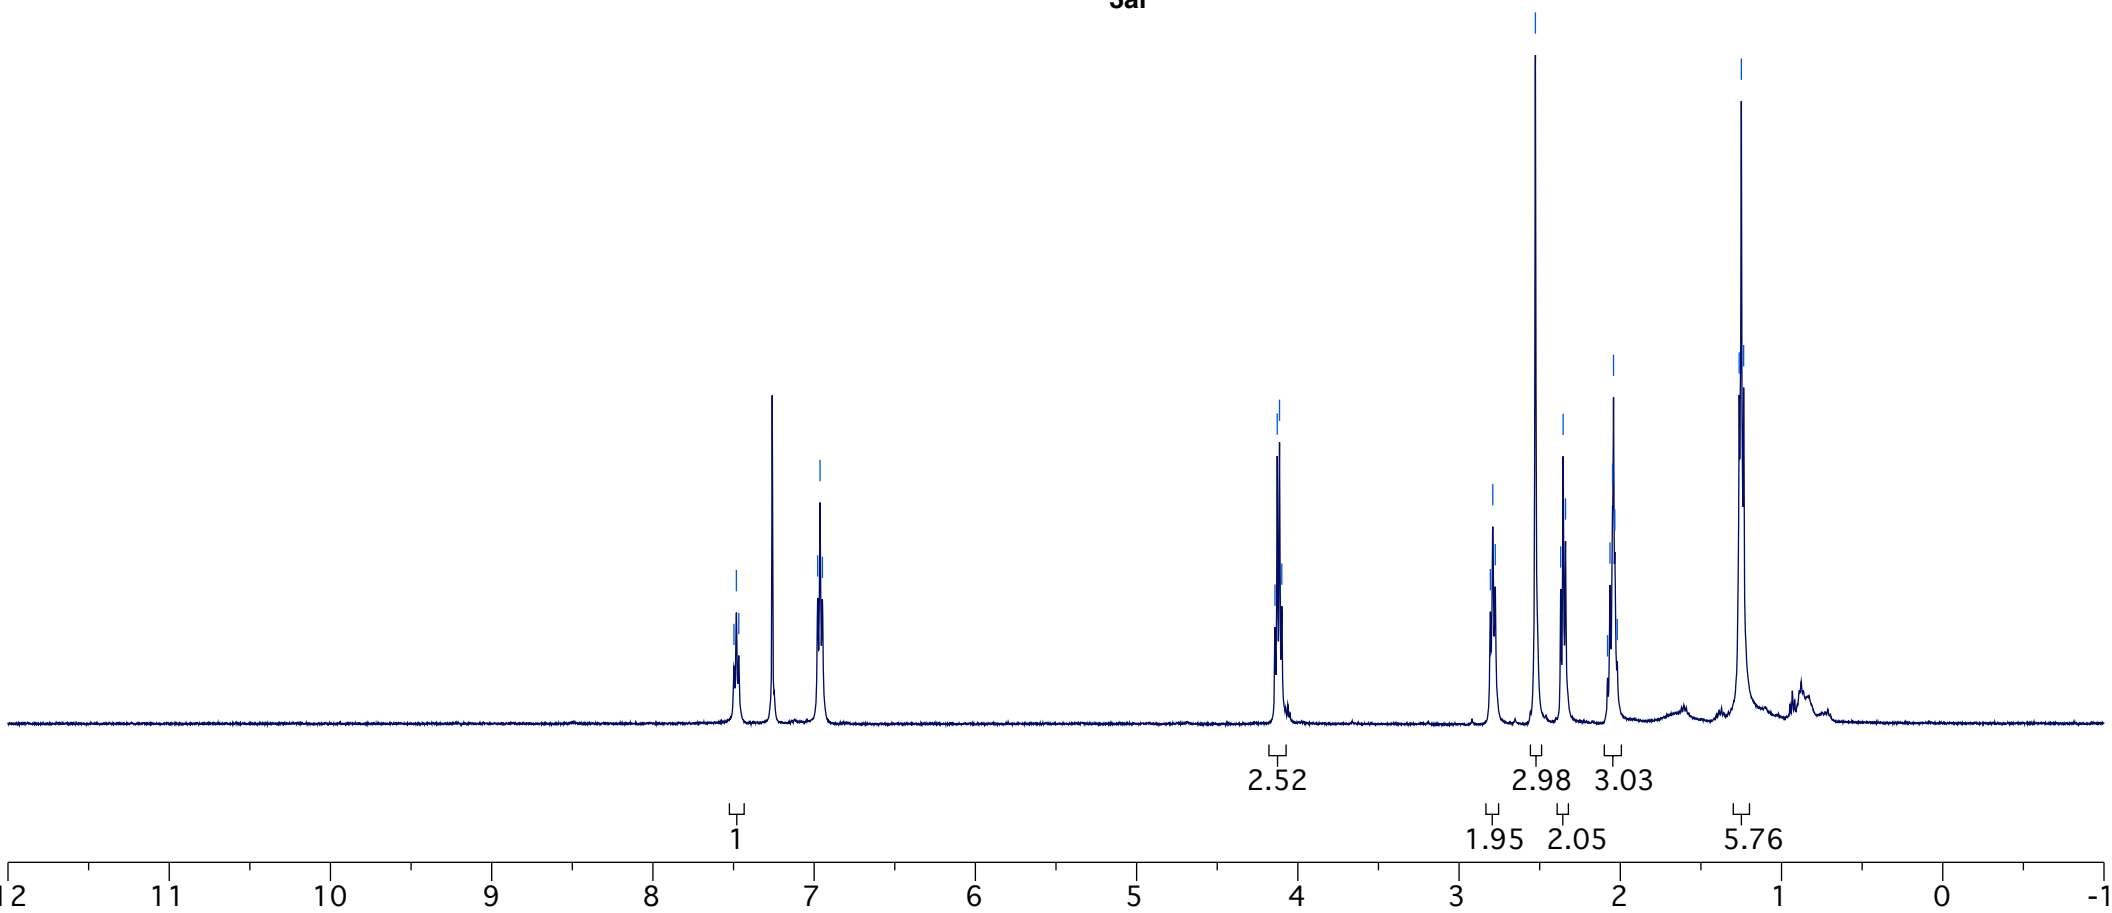

S-135

173.600

160.666

157.987

136.725

120.812

119.775

60.398

37.710

33.930

25.318

24.625

14.376

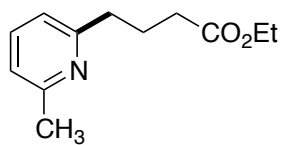

3al

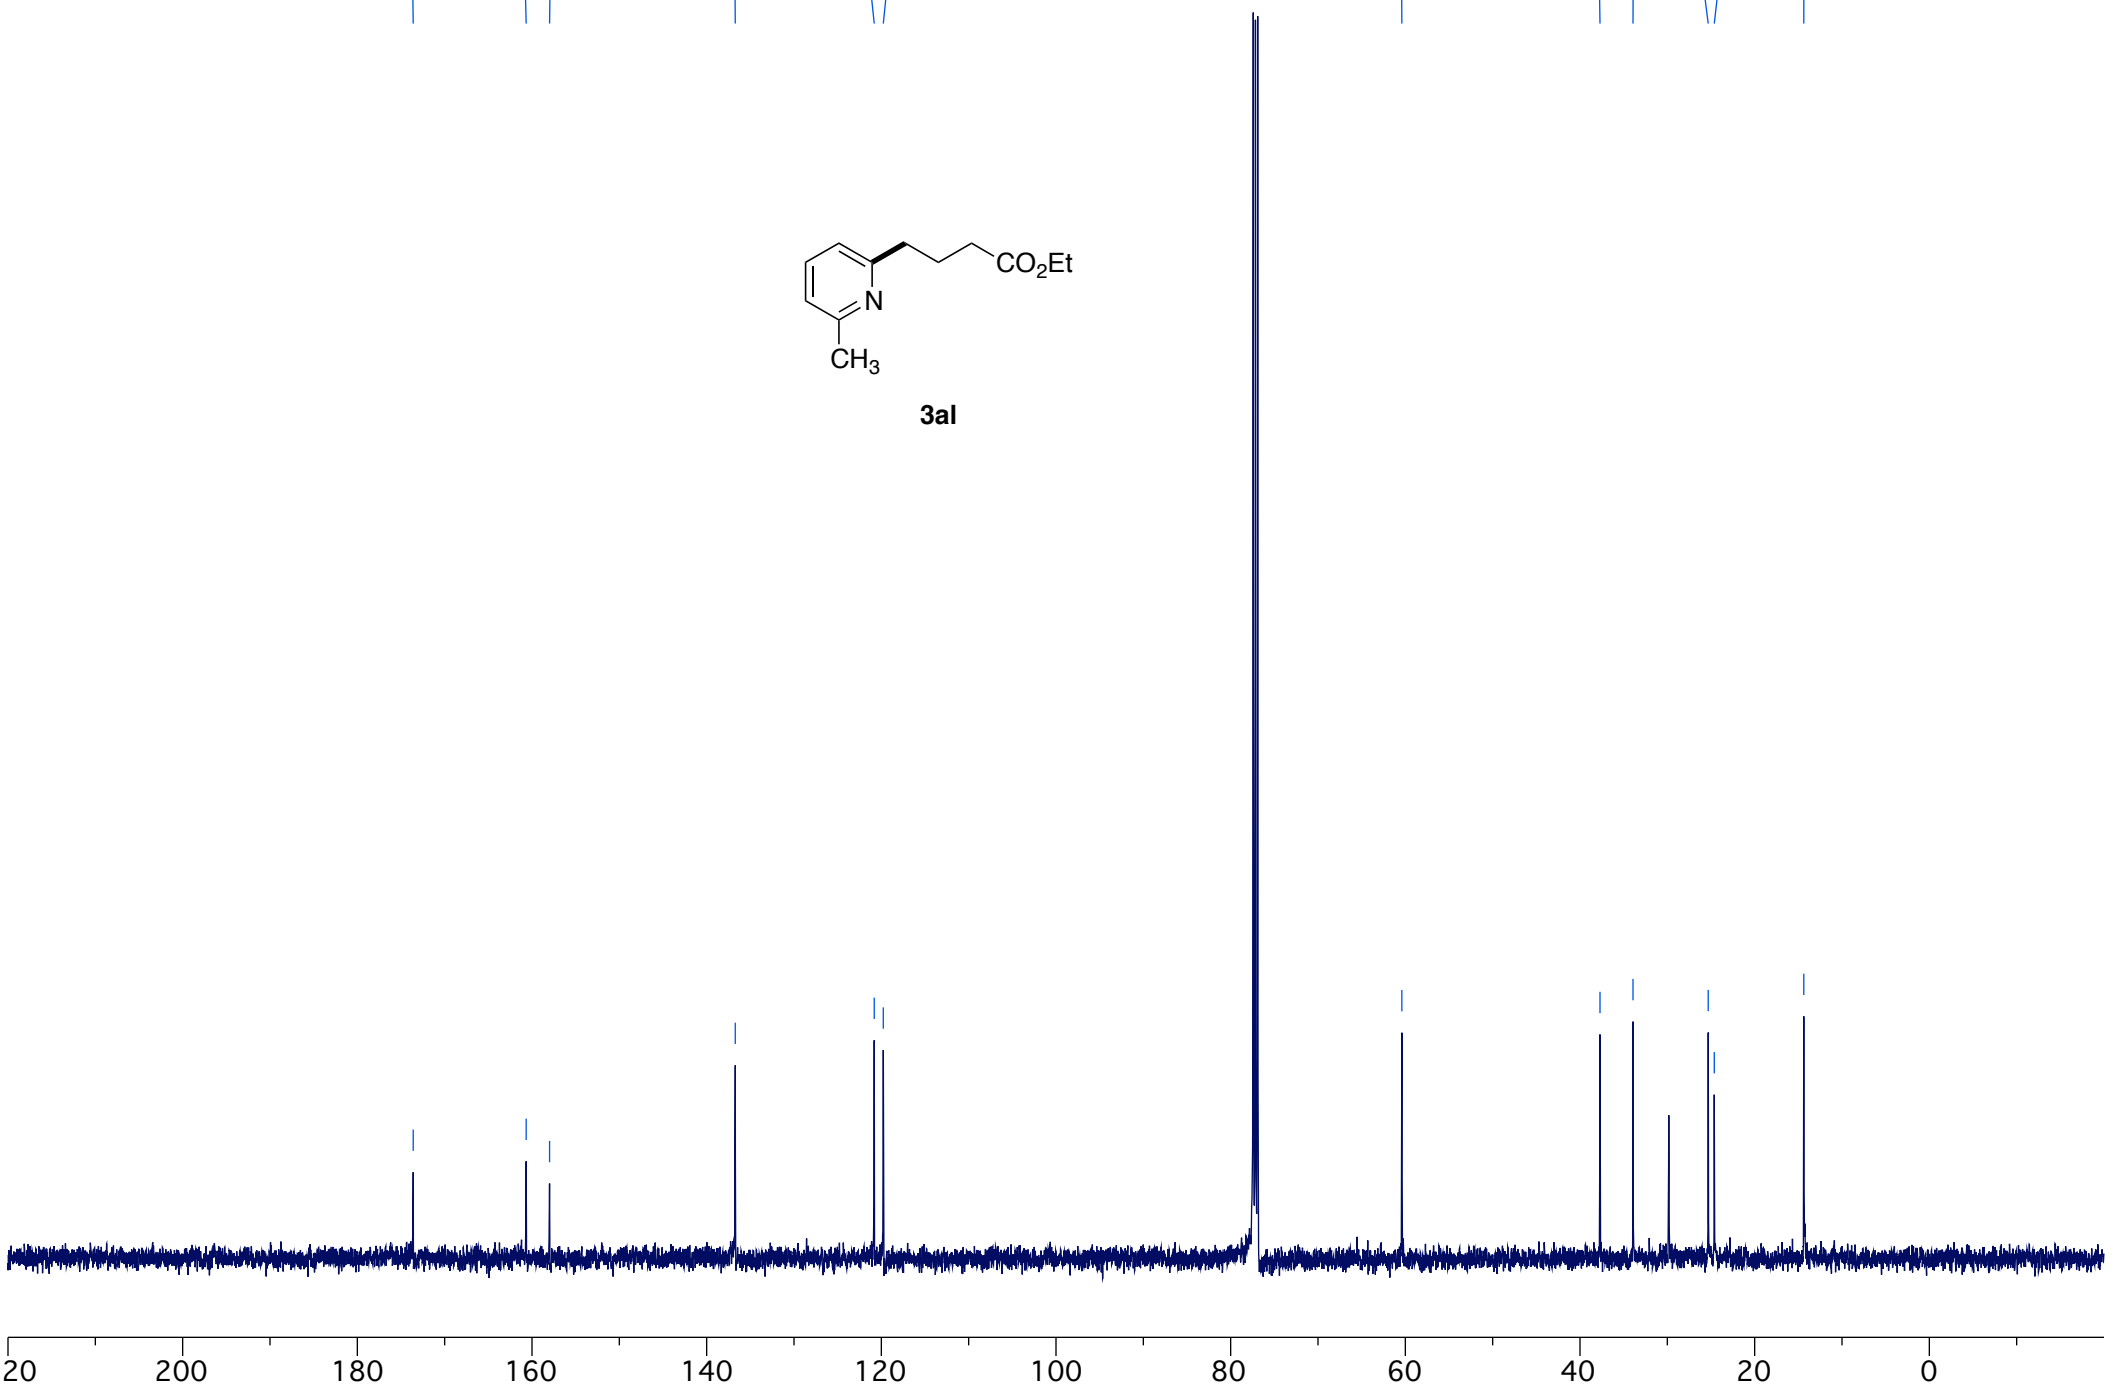

Supplement: ja301769r_si_001.pdf [file ja301769r_si_001.pdf]
